# Supplementary material for: Clinical evaluation of long-read sequencing-based episignature detection in developmental disorders
Source: PubMed Central journal article supplement — Genome Med. 2025 Jan 10;17:1. doi: 10.1186/s13073-024-01419-z (PMC11721592; doi:10.1186/s13073-024-01419-z), 2025-01-10

**Additional file 4: Fig. S1.**

**Differentially methylated regions : visualization.**

Phased nanopore sequencing methylation levels at the same 6 imprinted loci in blood of all patients, as well as the *AR*, *RP2*, and *PHF6* genes, in blood of all female patients (including the urine and buccal swab samples of EPI\_13 for the loci on chromosome X). Orange and blue represent the two different haplotypes of each sample. In the upper part of each Methylartist plot [18], the genome coordinates, genes and reads are illustrated. On each read, modified bases are represented by full, dark circles, unmodified bases by open circles. In the lower part of the plot, after translation from genome to CpG-only coordinate space, raw log-likelihood ratios are plotted above a smoothed graph of methylation fraction.

# EPI\_01\_hg38\_phased\_chr11\_1997509\_2003349

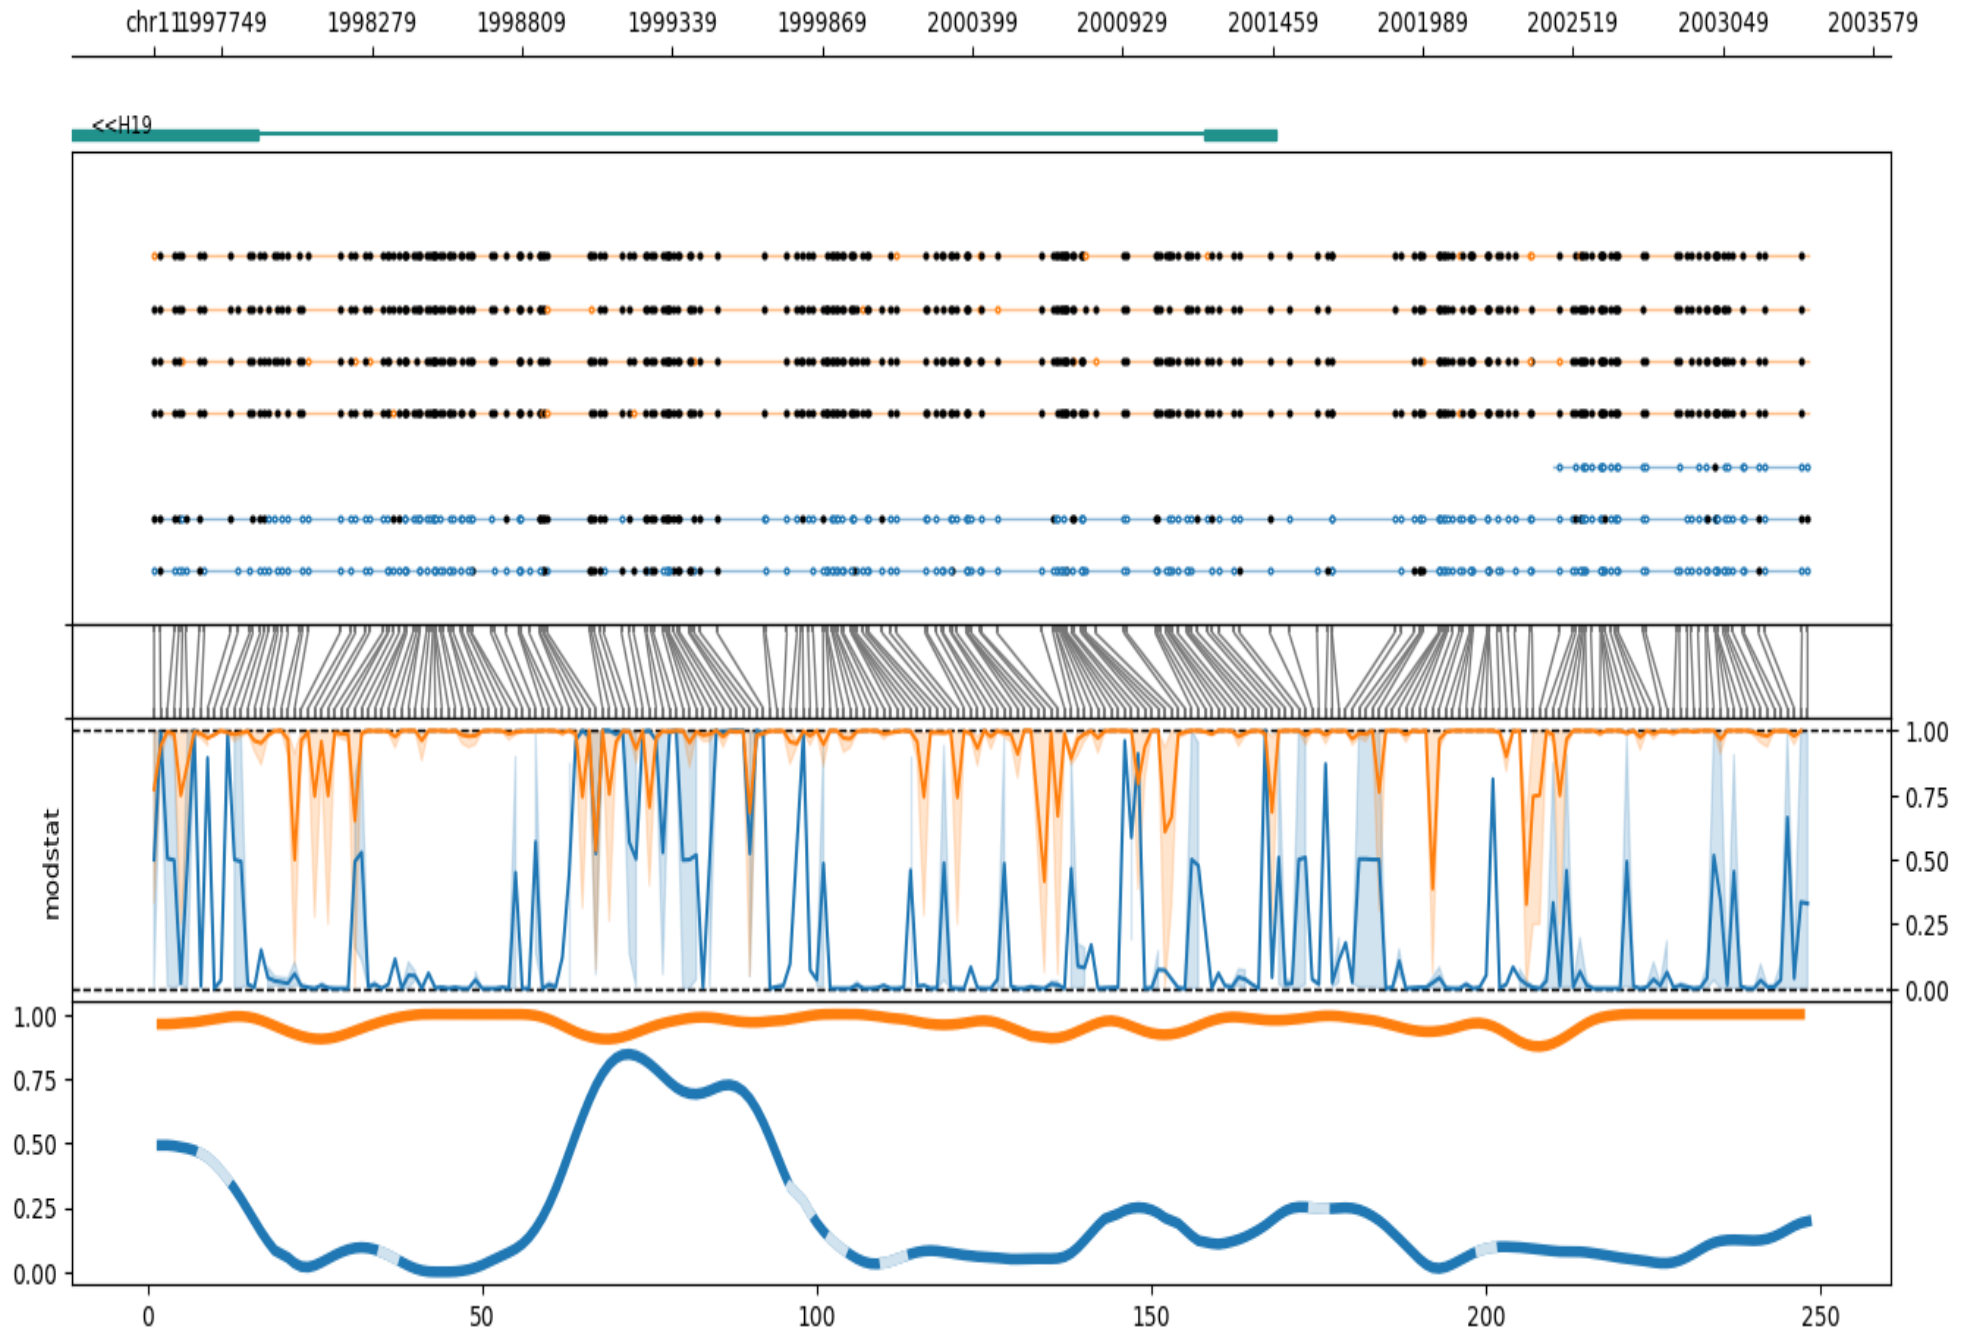

# EPI\_01\_hg38\_phased\_chr11\_2698155\_2701028

chr11 2698274 2698535 2698796 2699057 2699318 2699579 2699840 2700101 2700362 2700623 2700884 2701145

KCNQ1>>

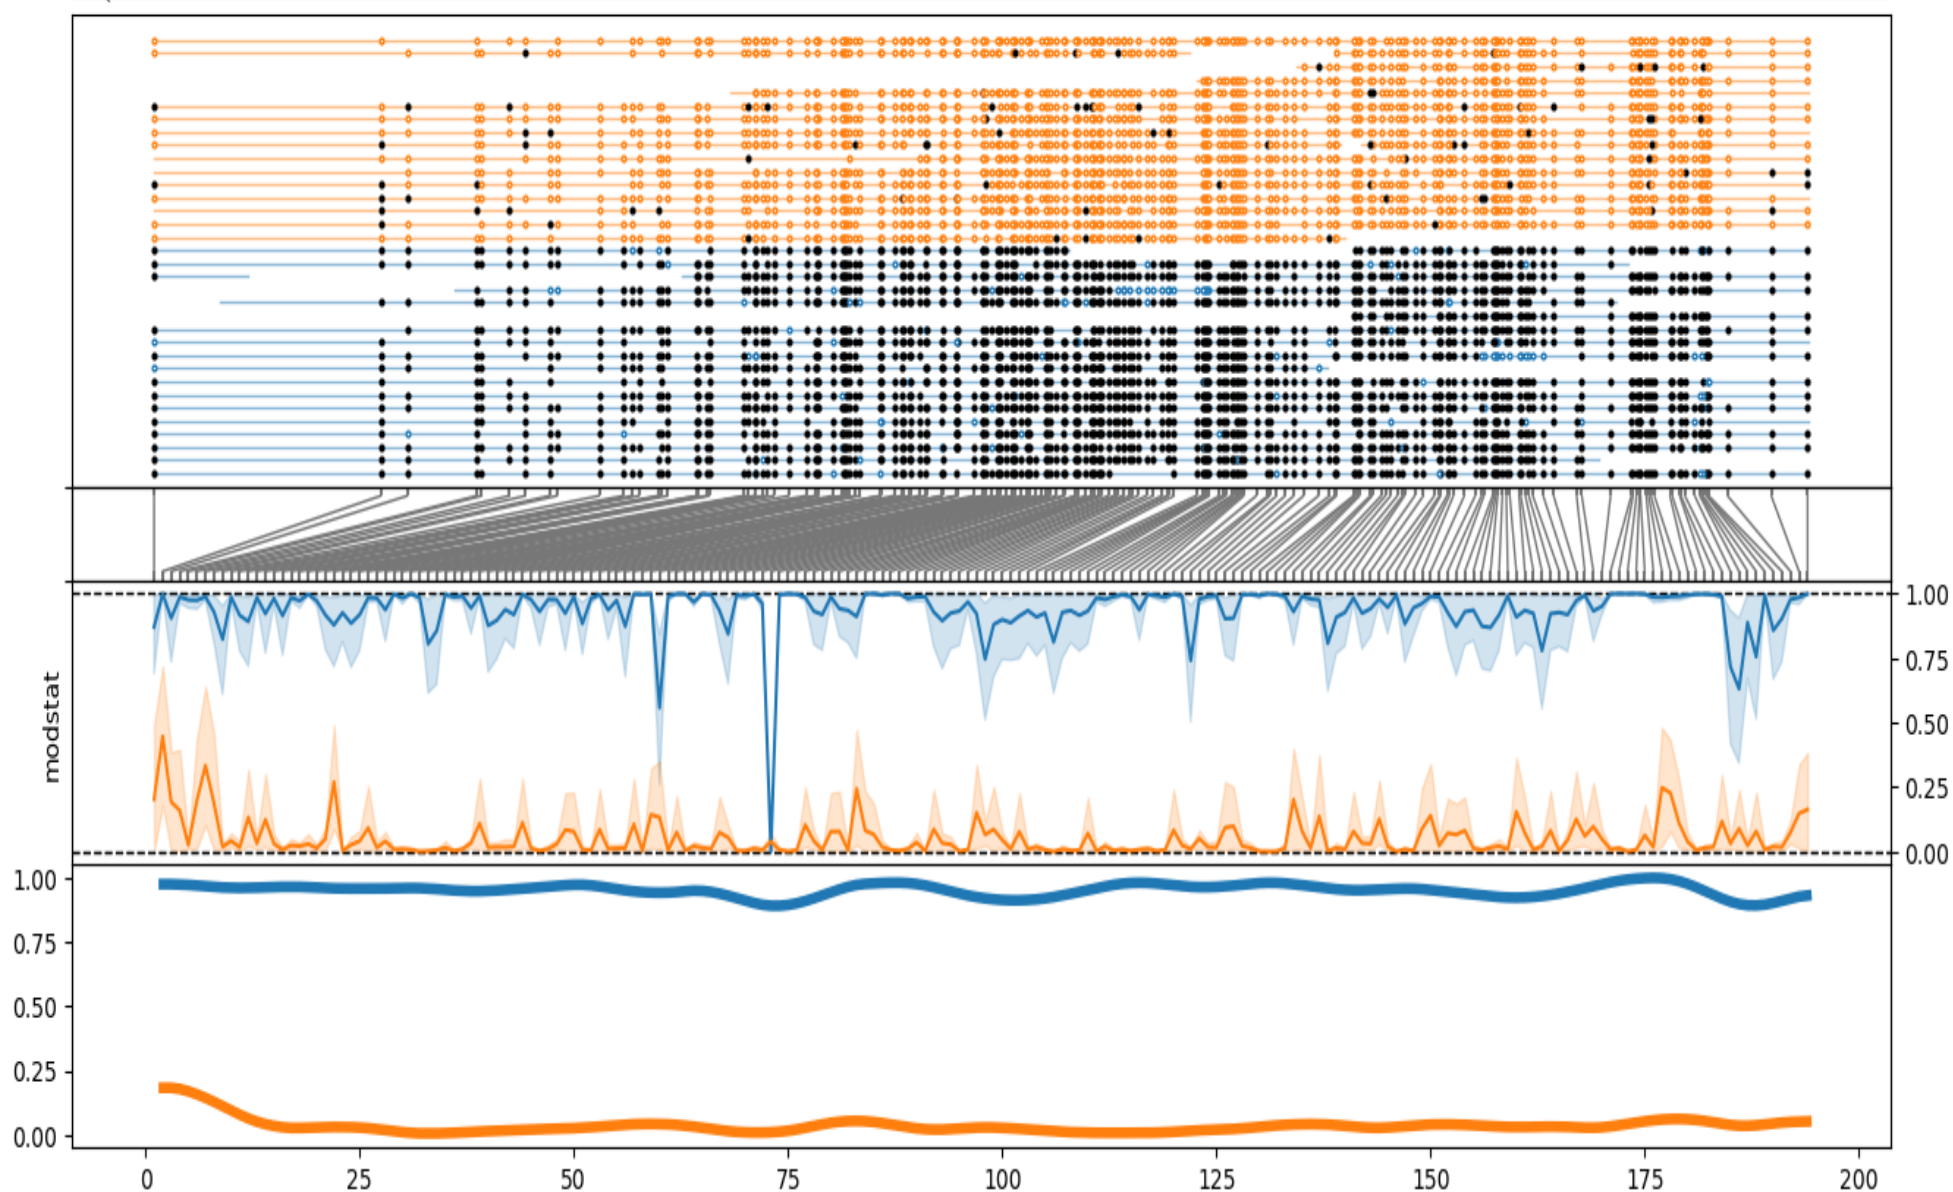

# EPI\_01\_hg38\_phased\_chr14\_100824185\_100827640

chr14 100824328 100824642 100824956 100825270 100825584 100825898 100826212 100826526 100826840 100827154 100827468 100827782

MEG3>>

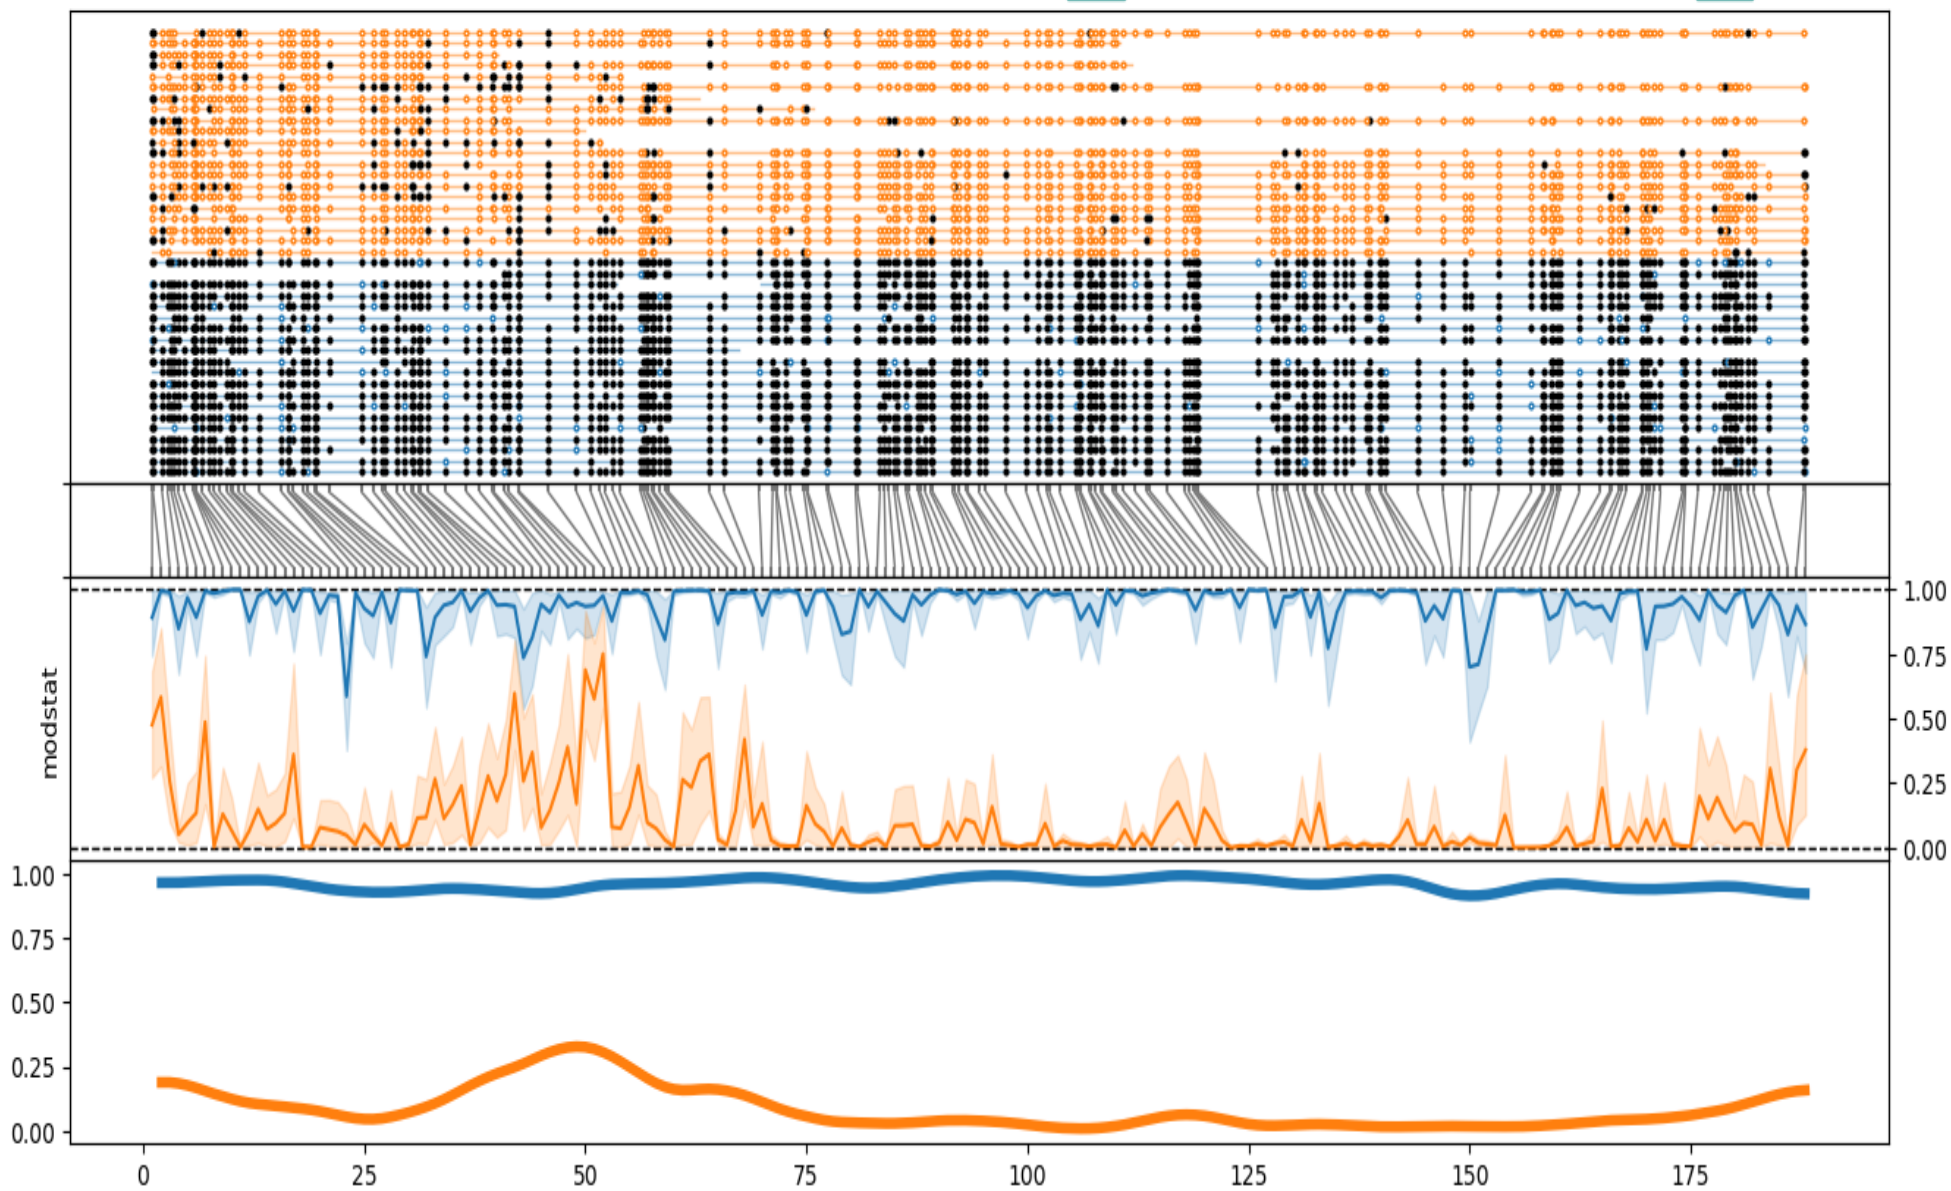



# EPI\_01\_hg38\_phased\_chr14\_100904325\_100905081

chr14 100904356 100904424 100904492 100904560 100904628 100904696 100904764 100904832 100904900 100904968 100905036 100905104

MEG8>>

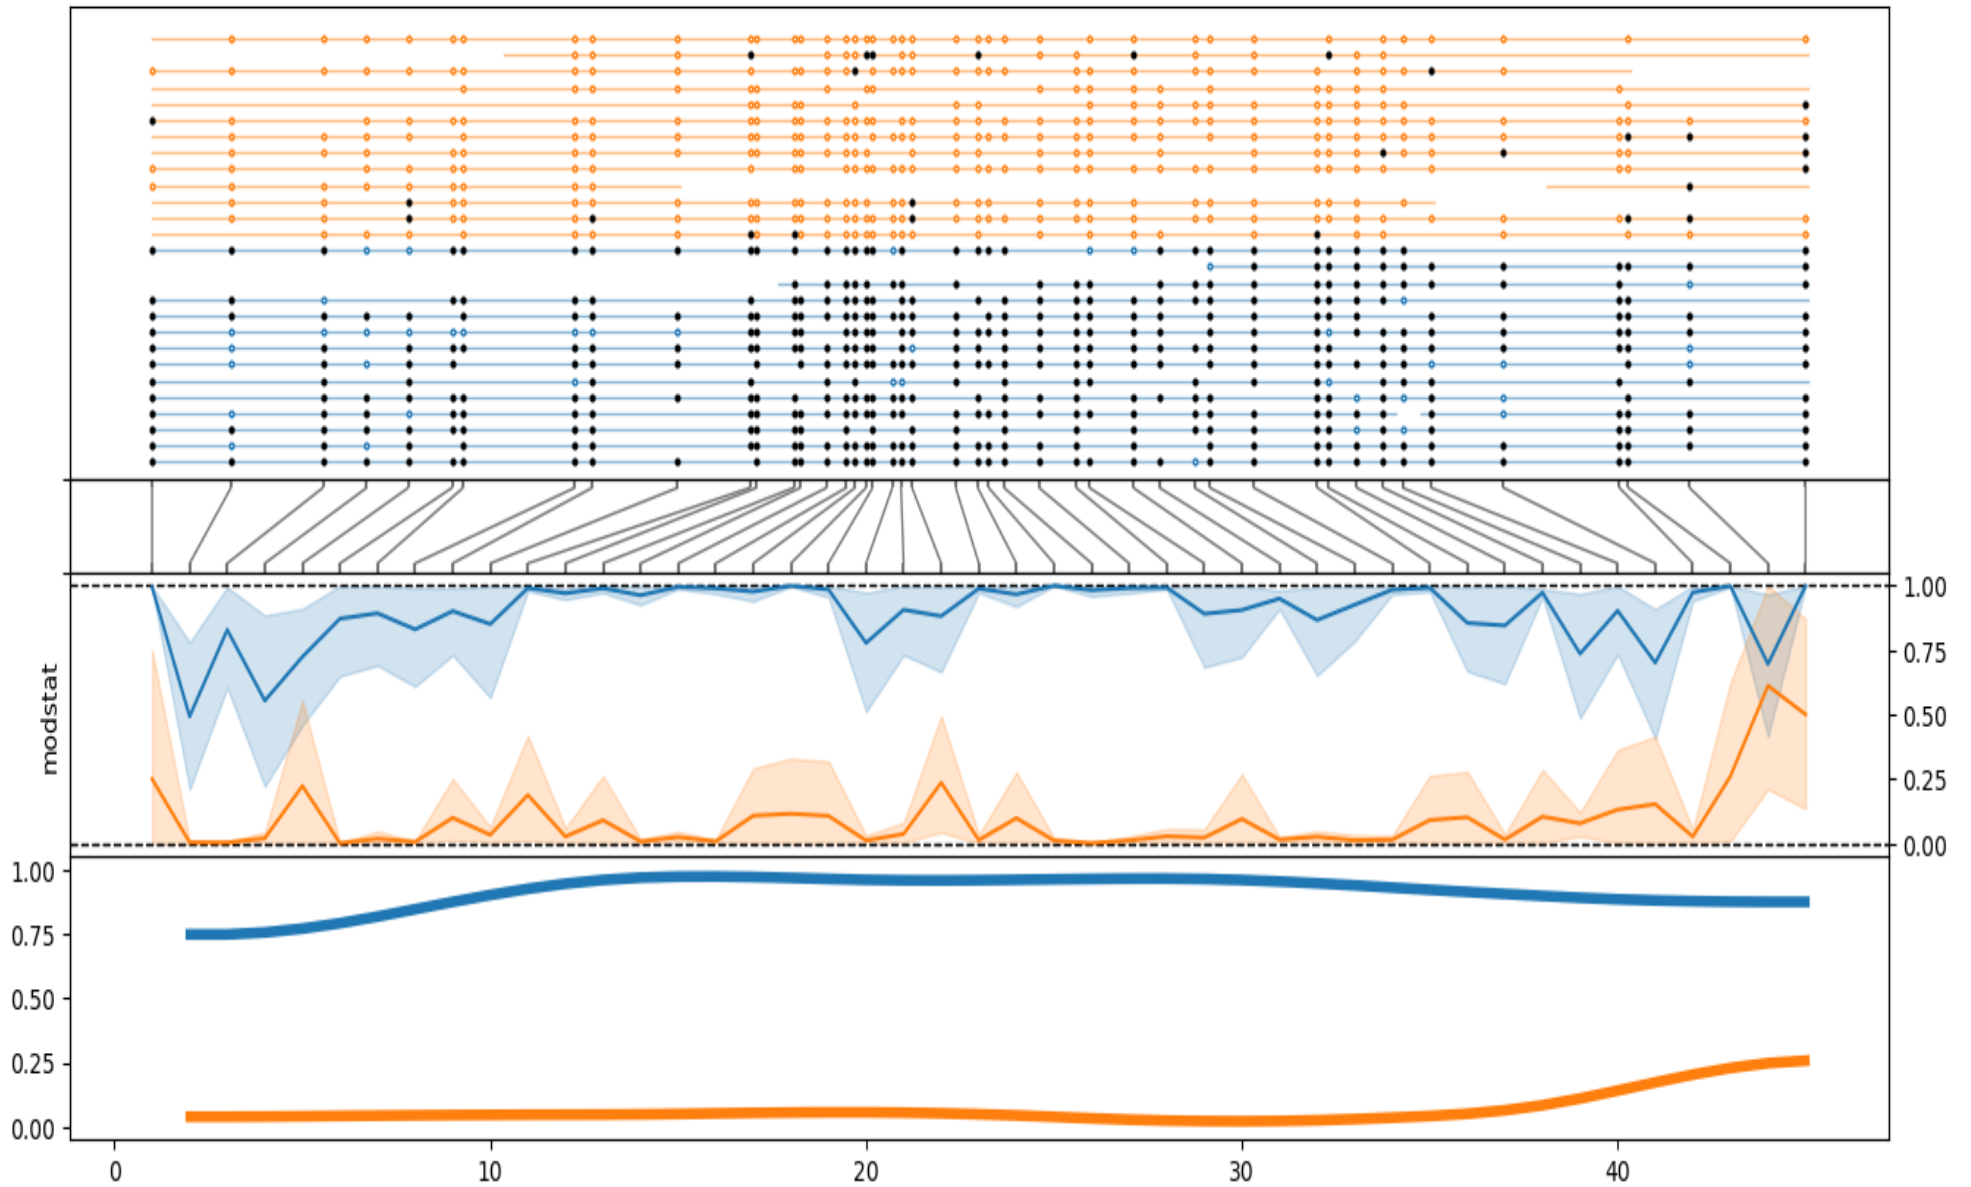

# EPI\_01\_hg38\_phased\_chr15\_23647178\_23648424

chr15 23647229 23647342 23647455 23647568 23647681 23647794 23647907 23648020 23648133 23648246 23648359 23648472

<<MAGEL2

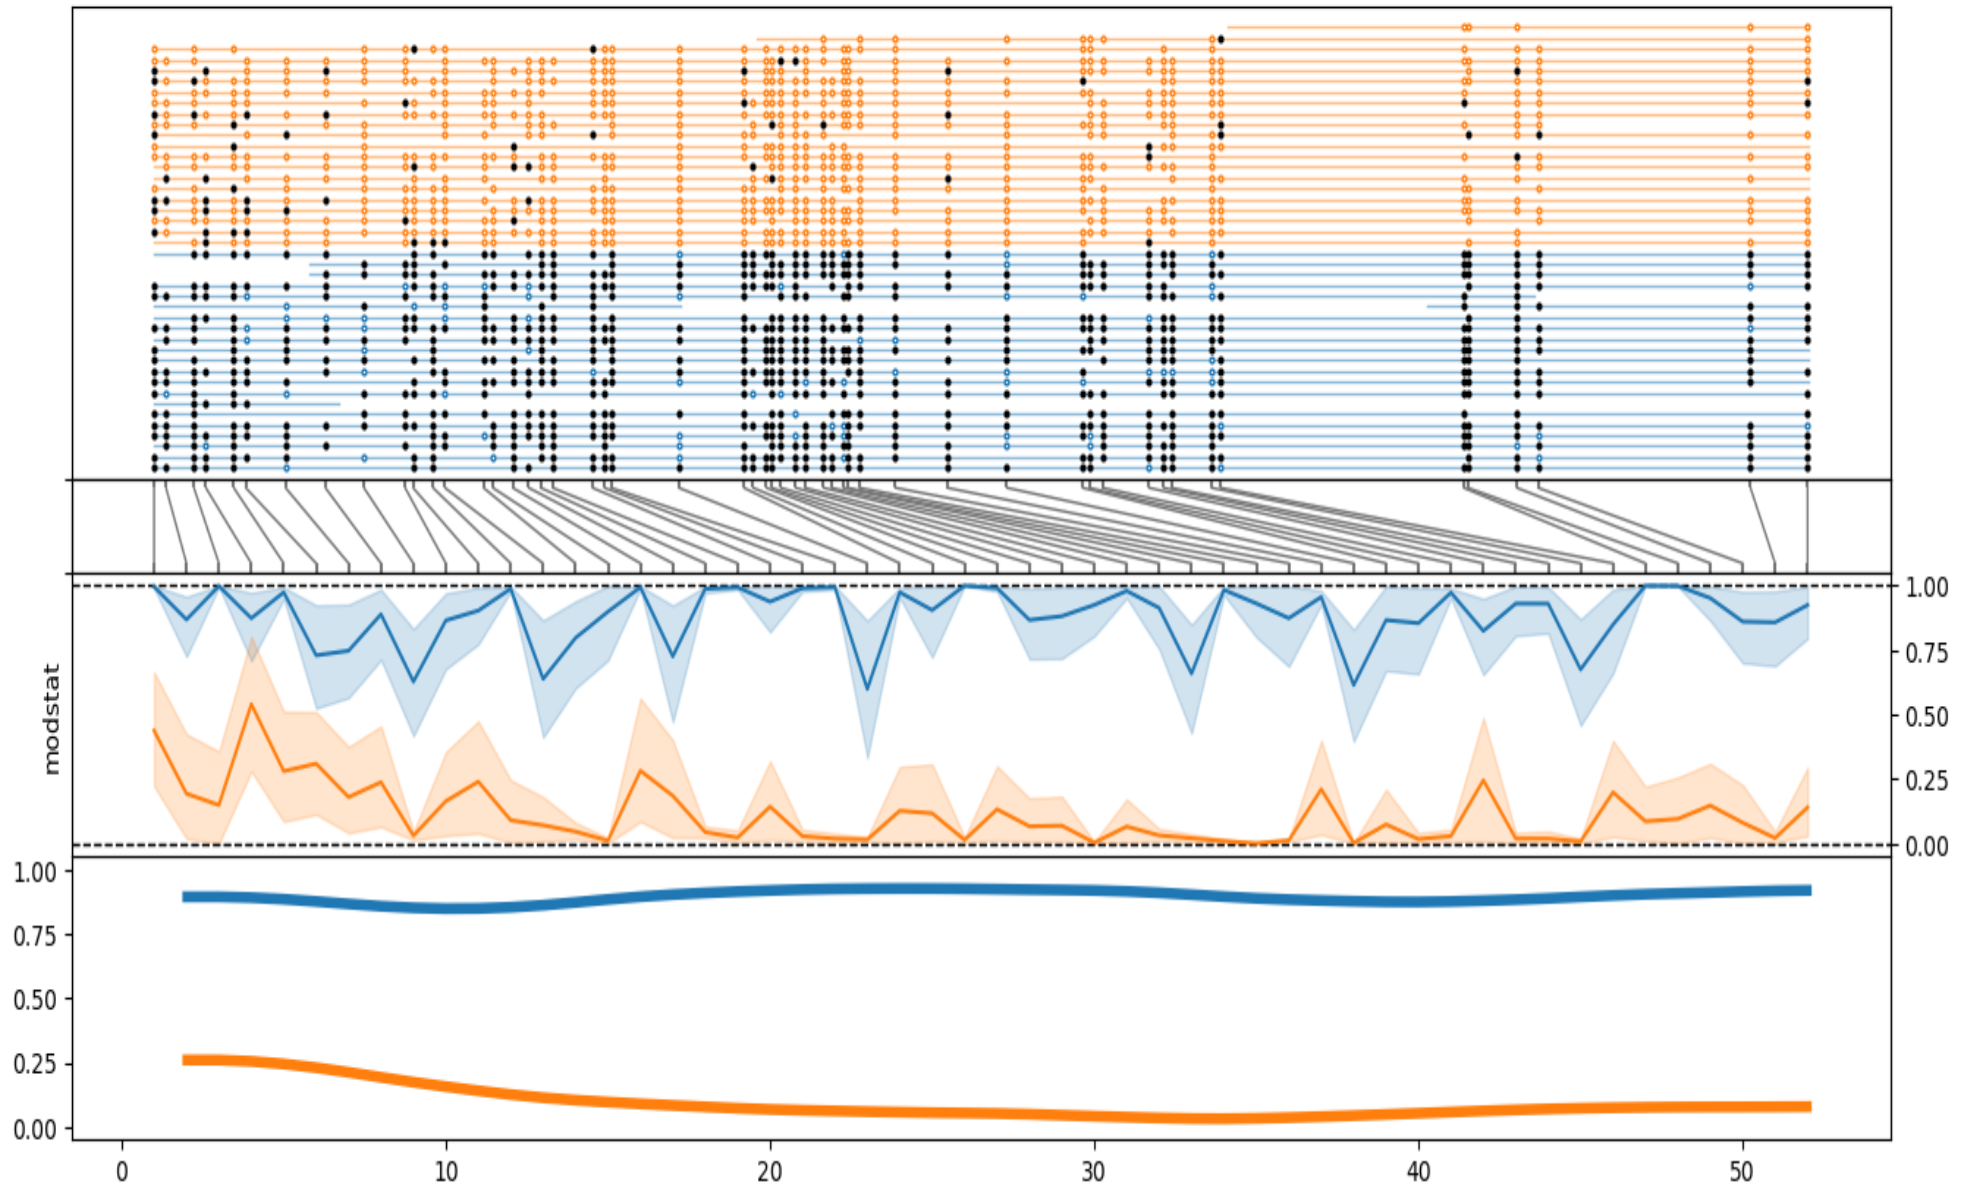

# EPI\_01\_hg38\_phased\_chr15\_24954564\_24956828

chr15:24954564 24954862 24955067 24955272 24955477 24955682 24955887 24956092 24956297 24956502 24956707 24956912

SNRPN>>

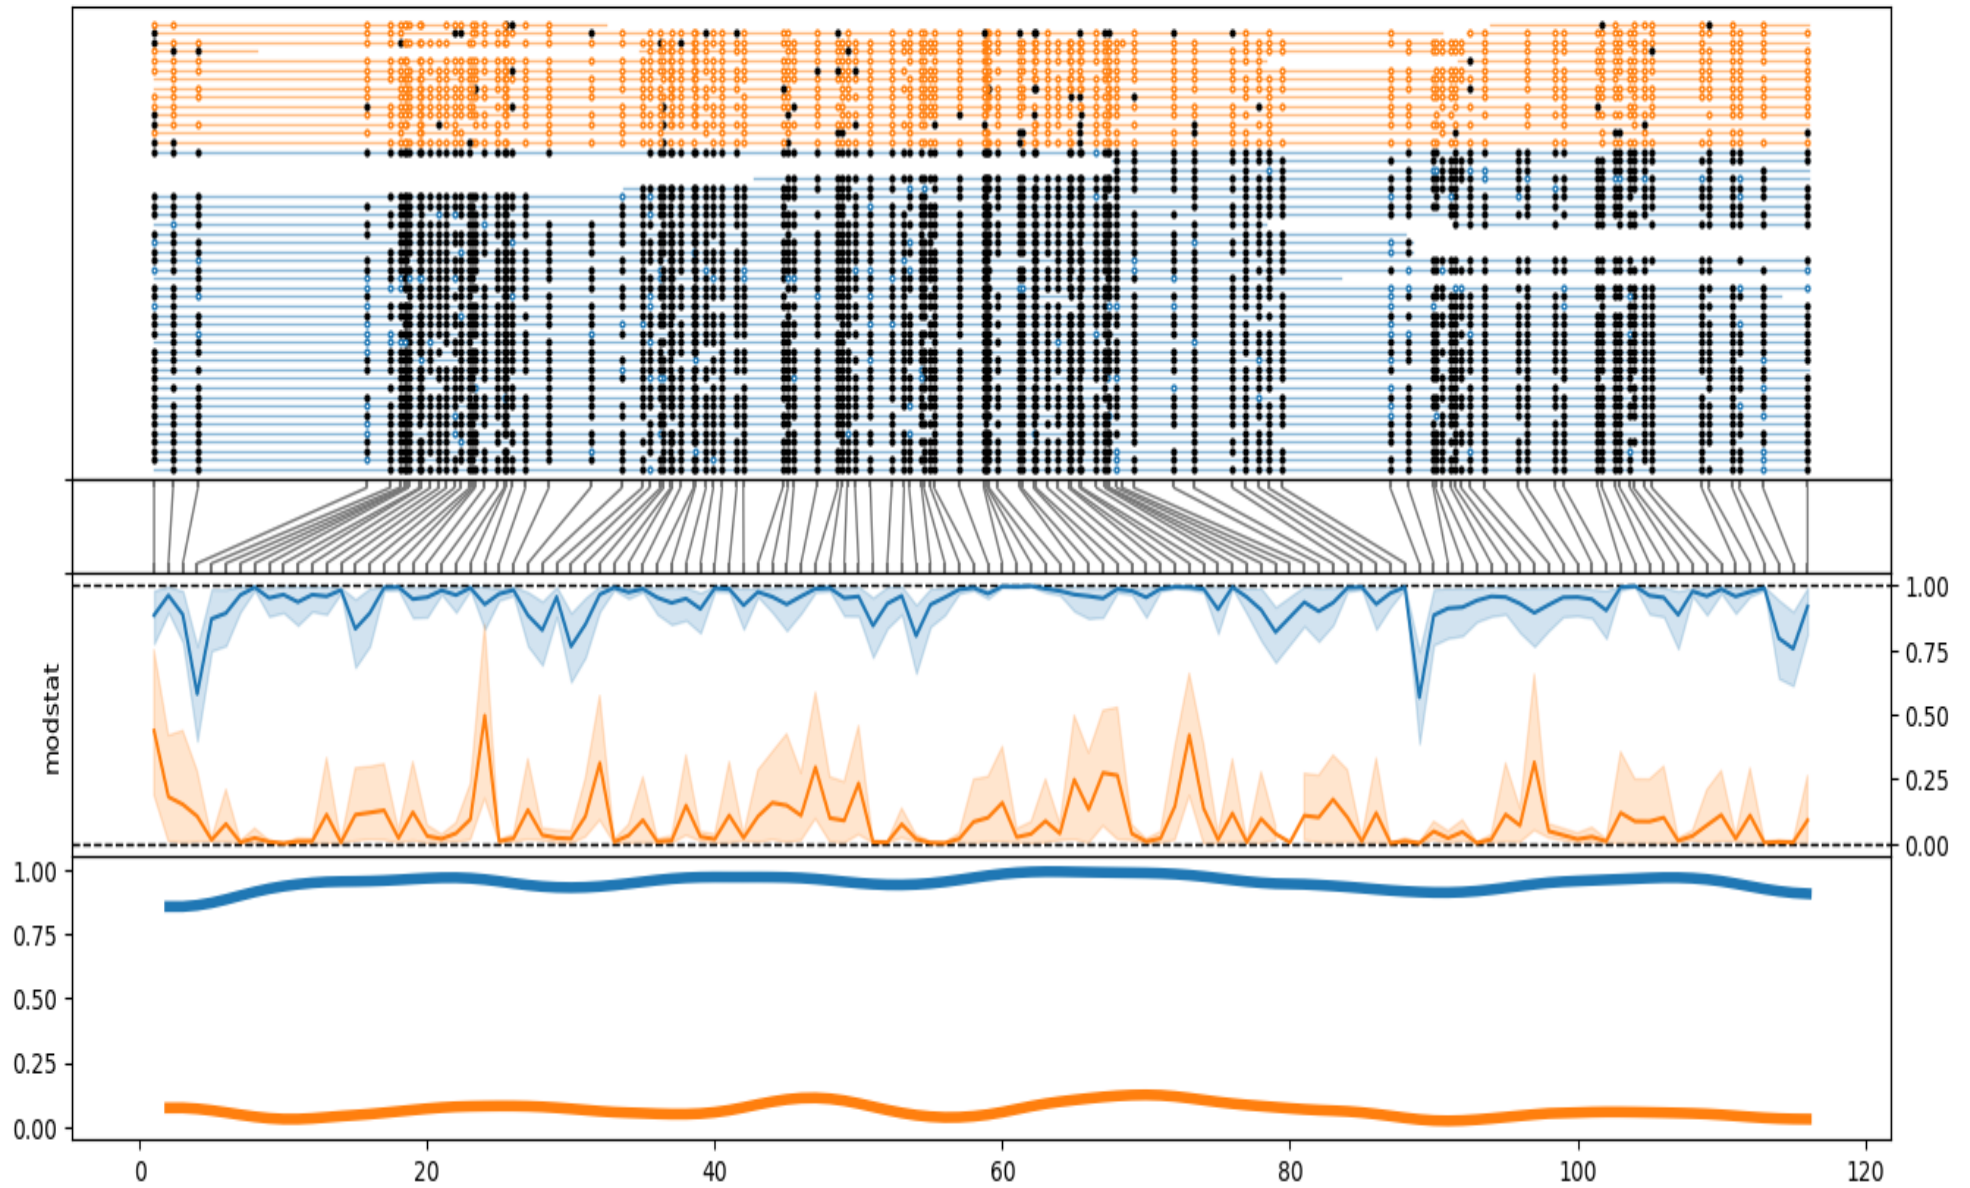

# EPI\_01\_hg38\_phased\_chrX\_134372110\_134374891

chrX 134372223 134372475 134372727 134372979 134373231 134373483 134373735 134373987 134374239 134374491 134374743 134374995

PHF6>>

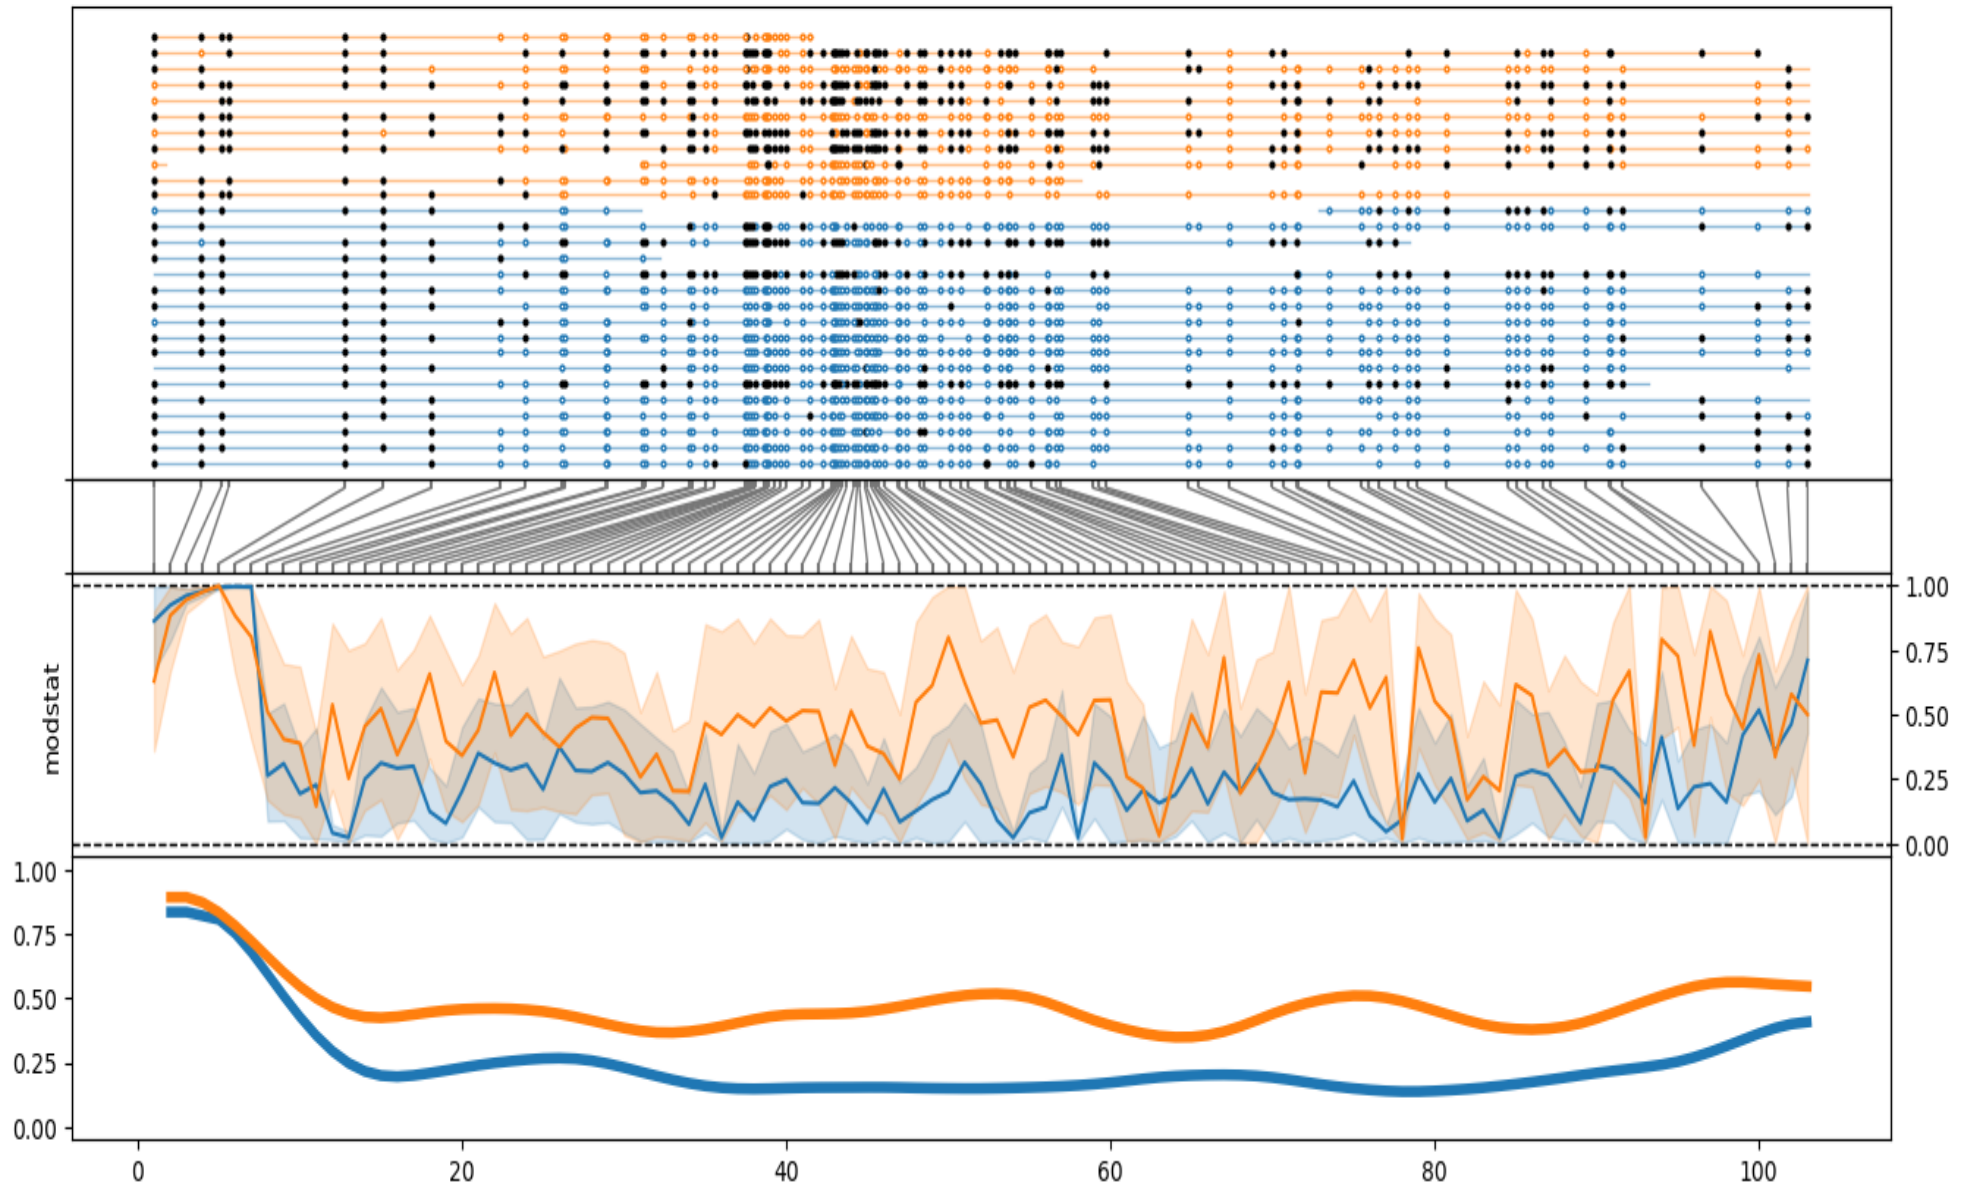



# EPI\_01\_hg38\_phased\_chrX\_46836539\_46837273

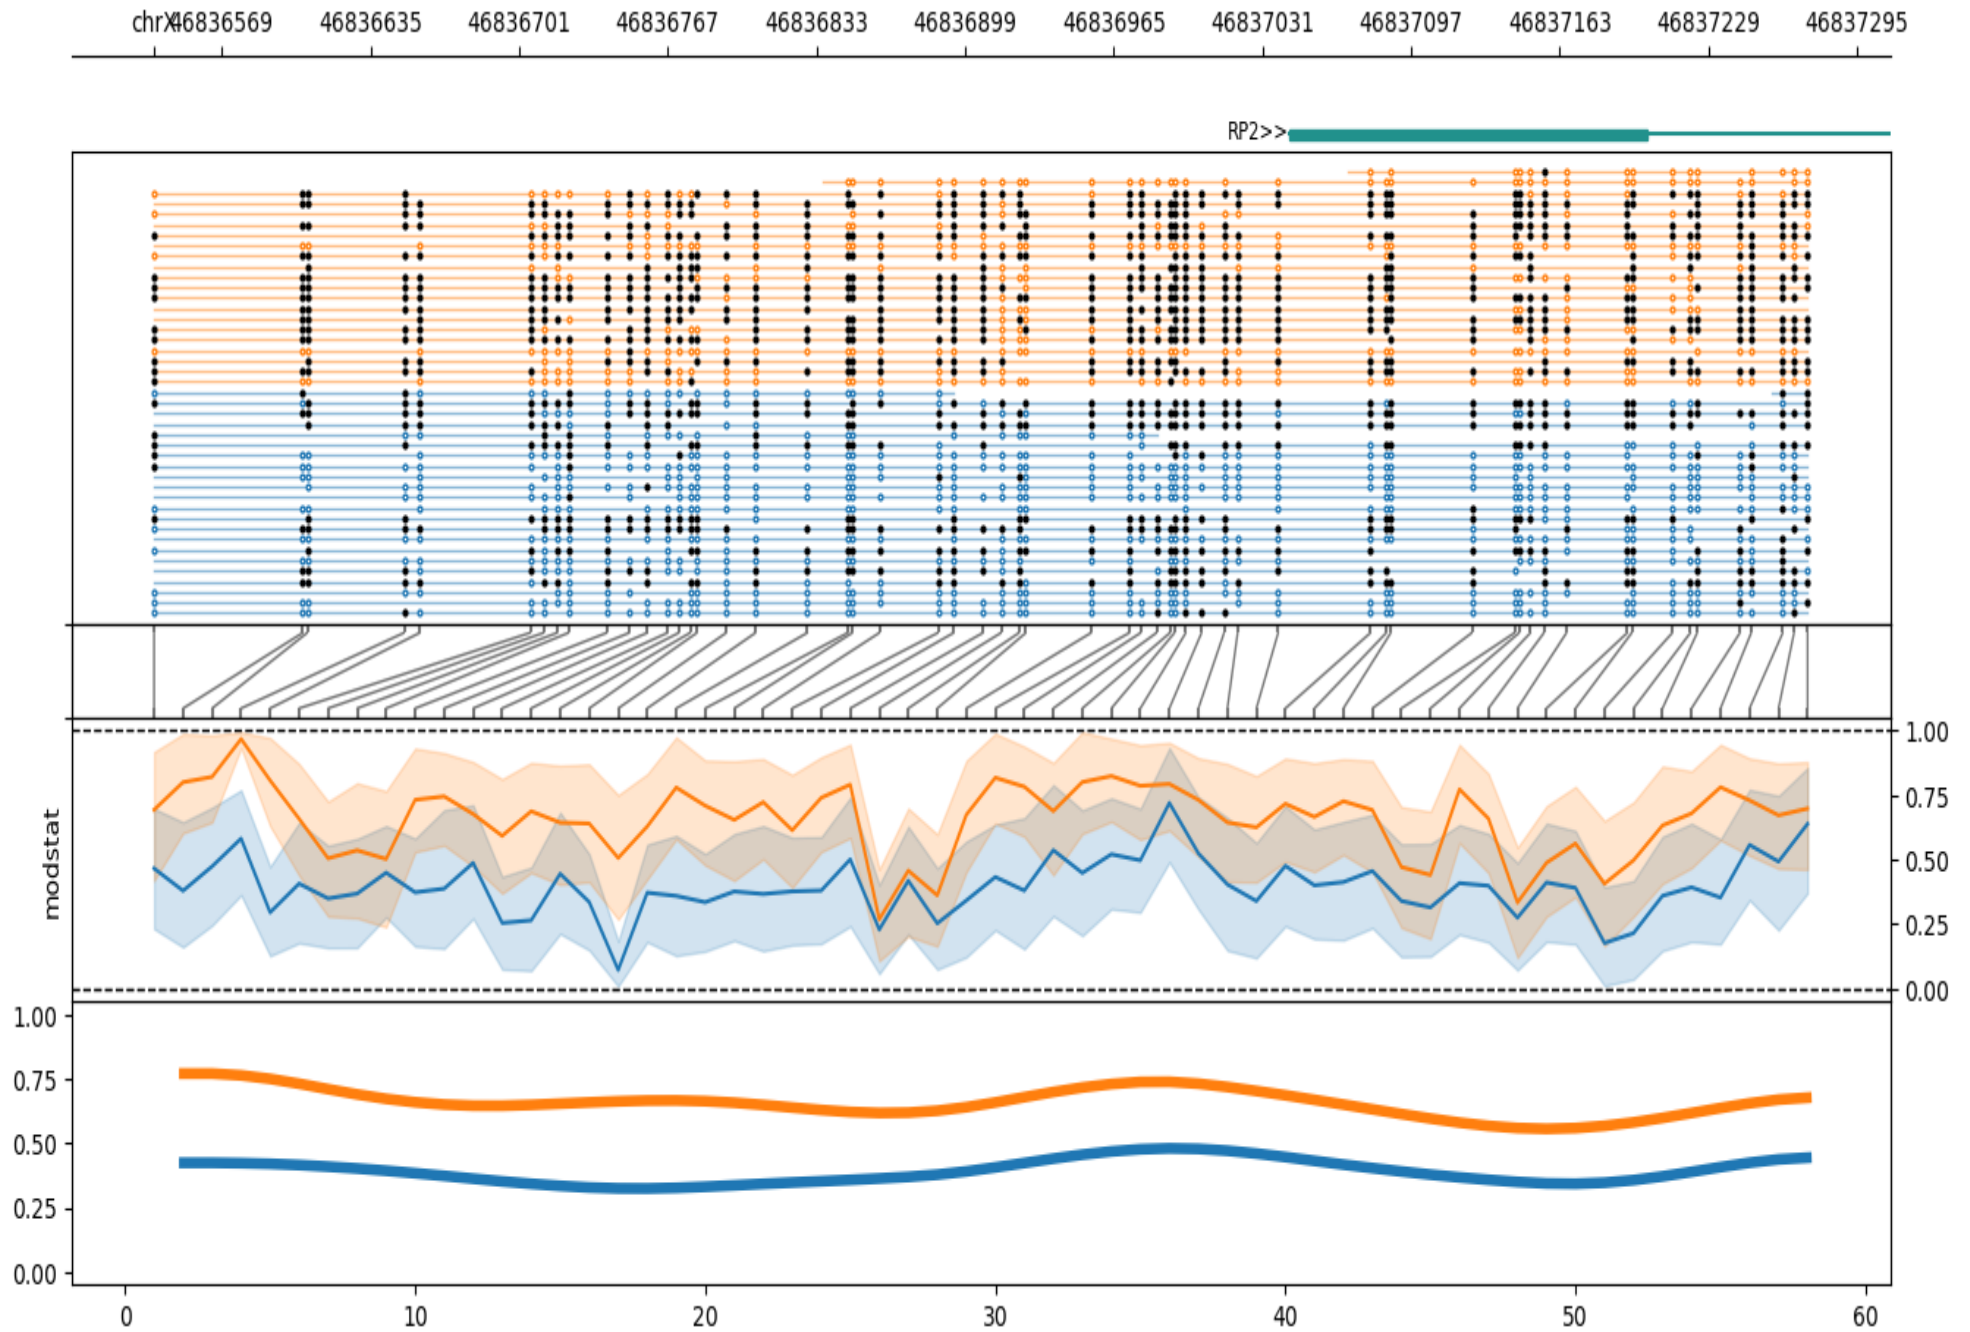



# EPI\_01\_hg38\_phased\_chrX\_67543761\_67546170

chr67543860 67544079 67544298 67544517 67544736 67544955 67545174 67545393 67545612 67545831 67546050 67546269

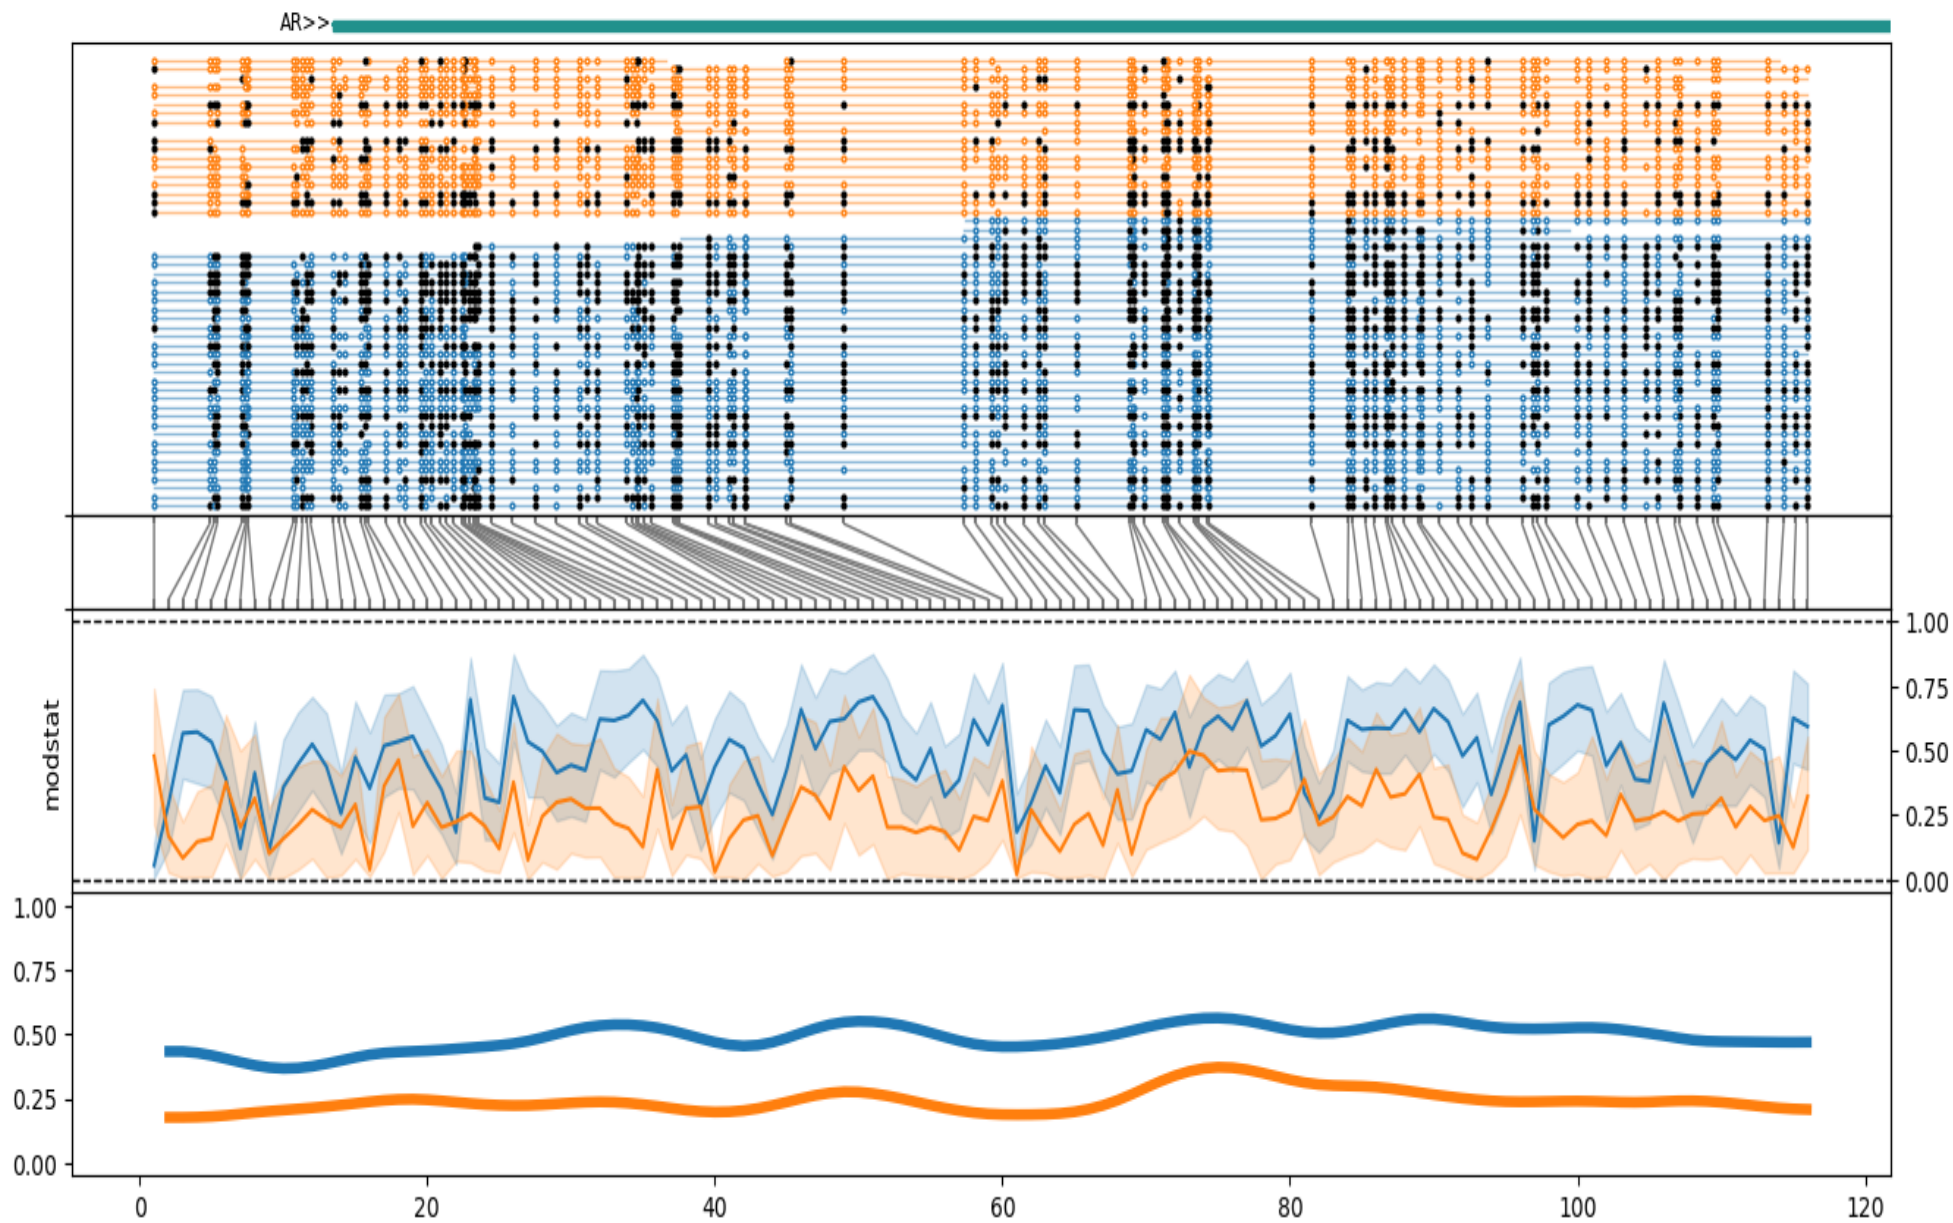

# EPI\_02\_hg38\_phased\_chr11\_1997509\_2003349

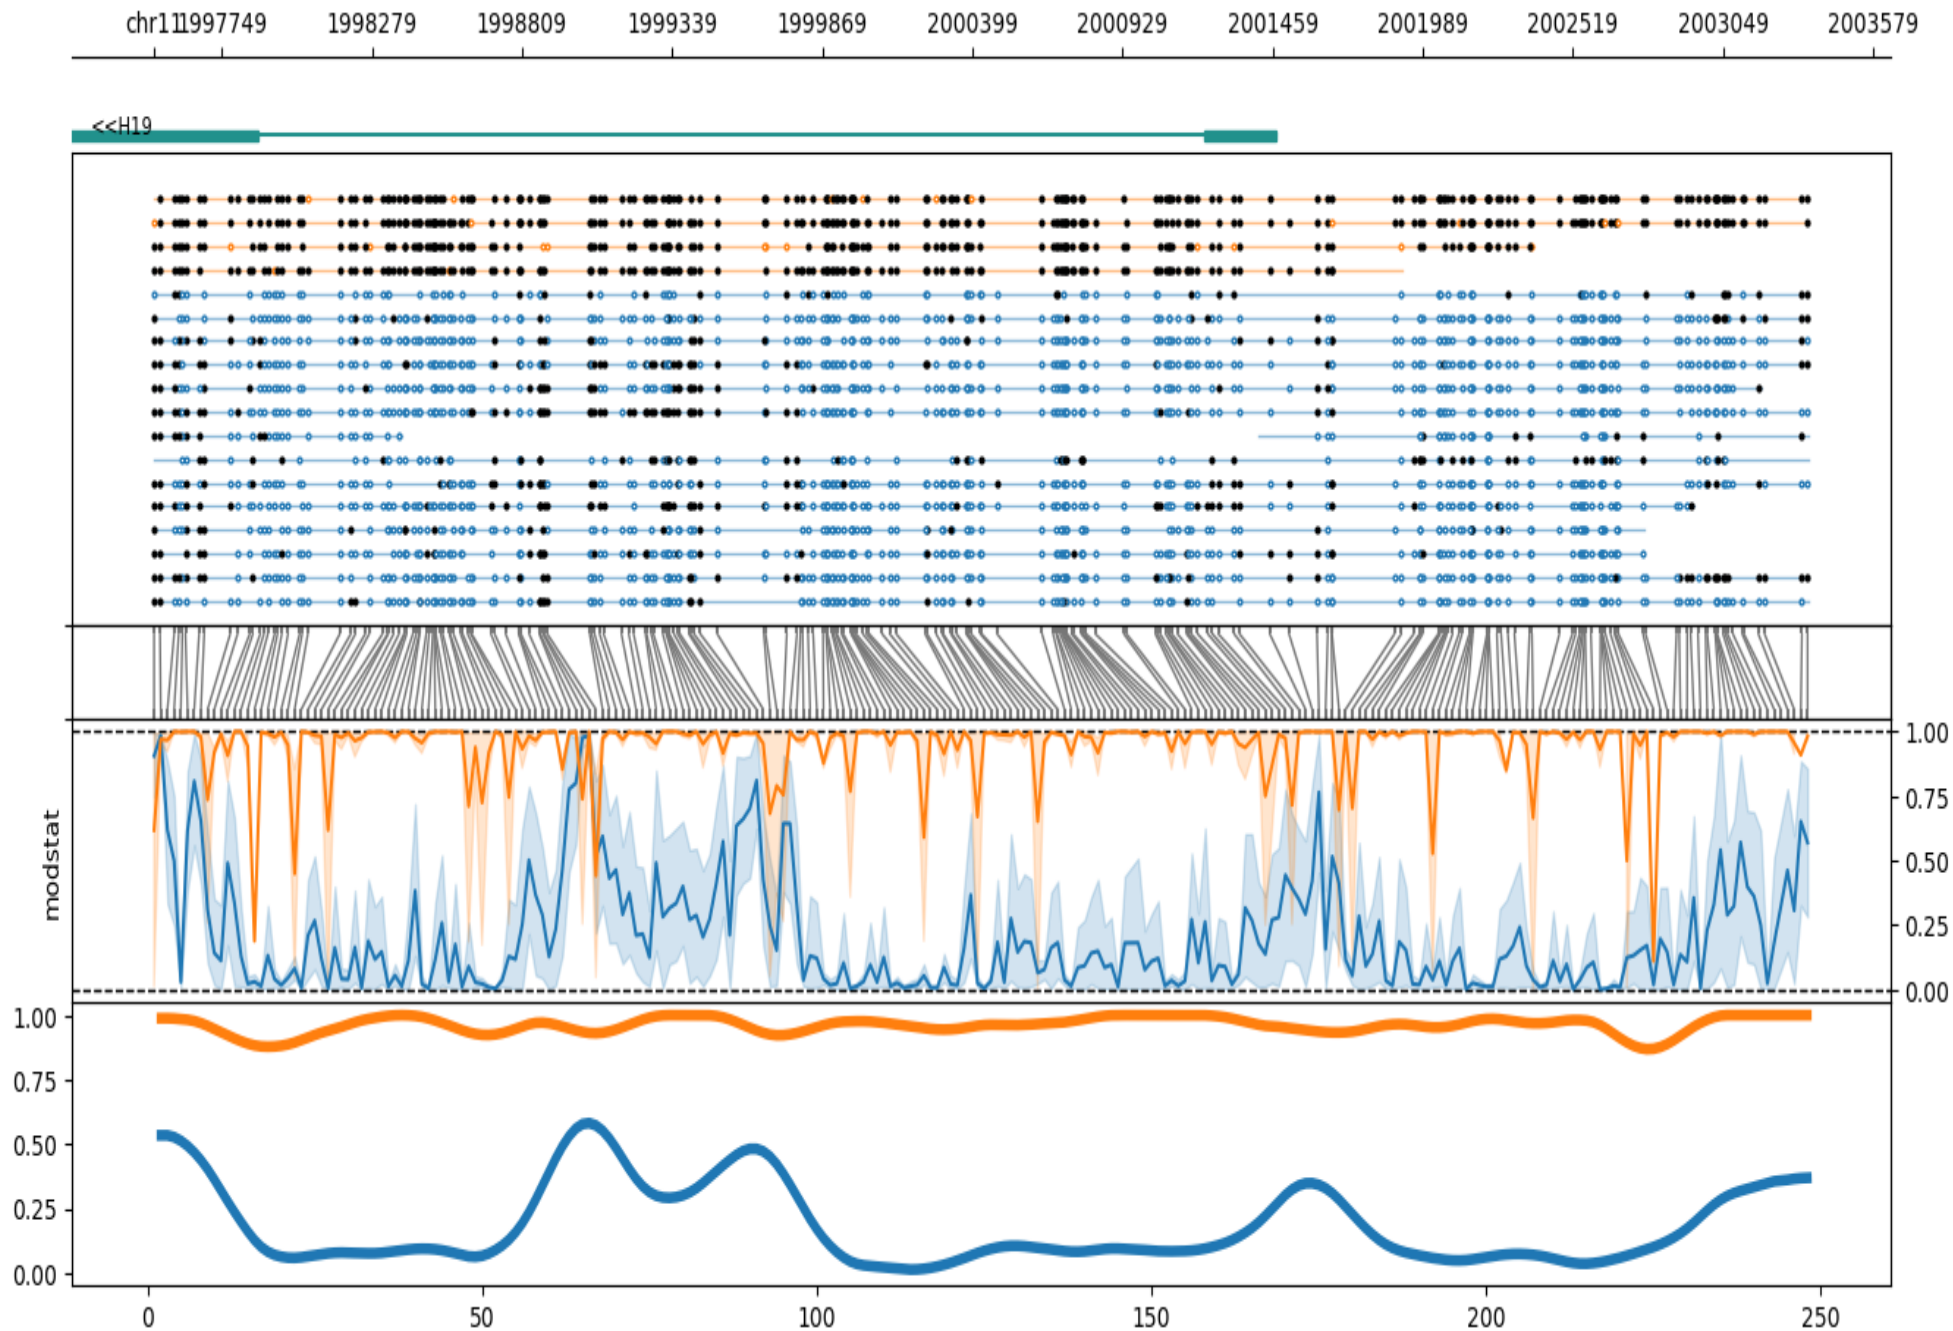

# EPI\_02\_hg38\_phased\_chr11\_2698155\_2701028

chr11 2698274 2698535 2698796 2699057 2699318 2699579 2699840 2700101 2700362 2700623 2700884 2701145

KCNQ1>>

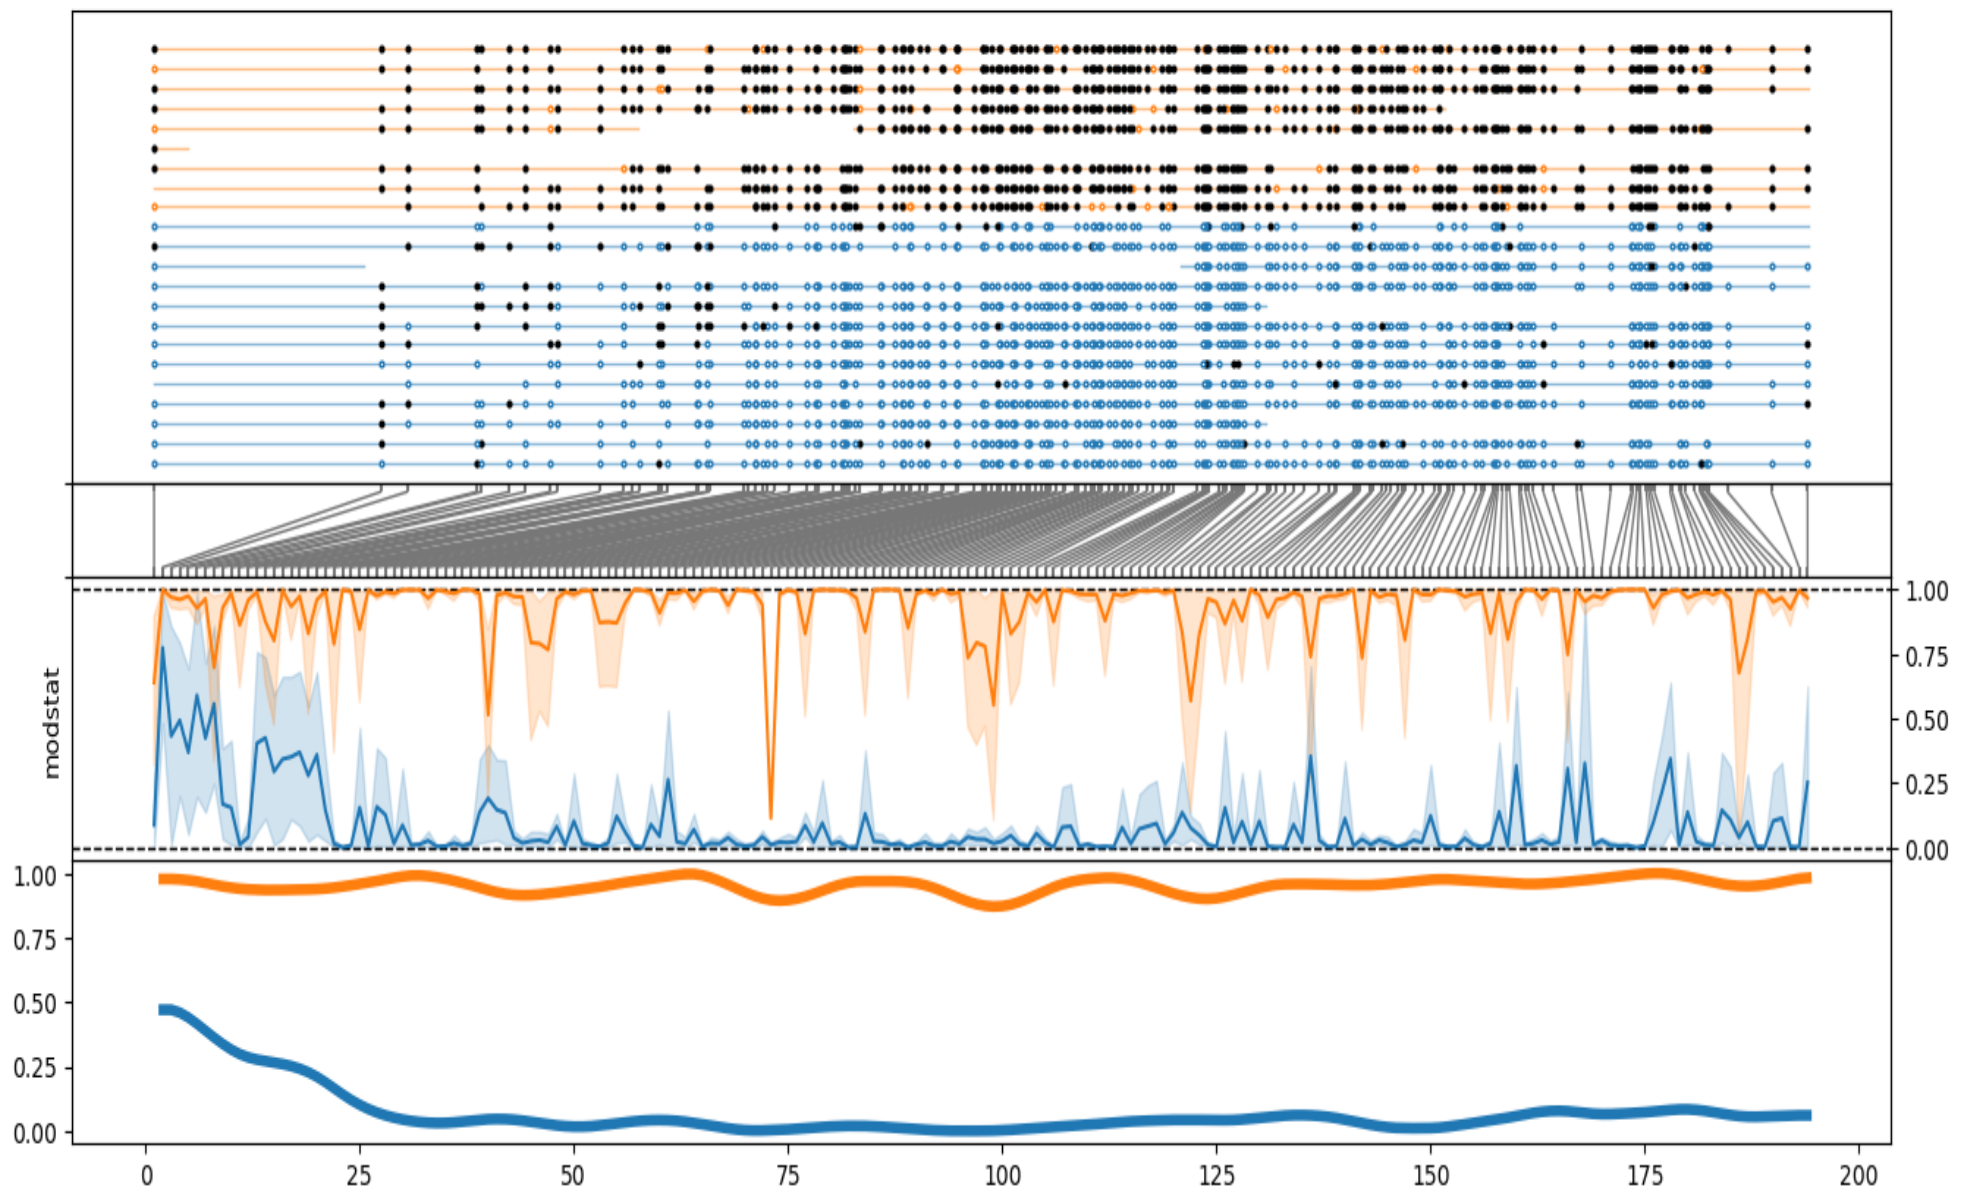



# EPI\_02\_hg38\_phased\_chr14\_100824185\_100827640

chr14 100824328 100824642 100824956 100825270 100825584 100825898 100826212 100826526 100826840 100827154 100827468 100827782

MEG3>>

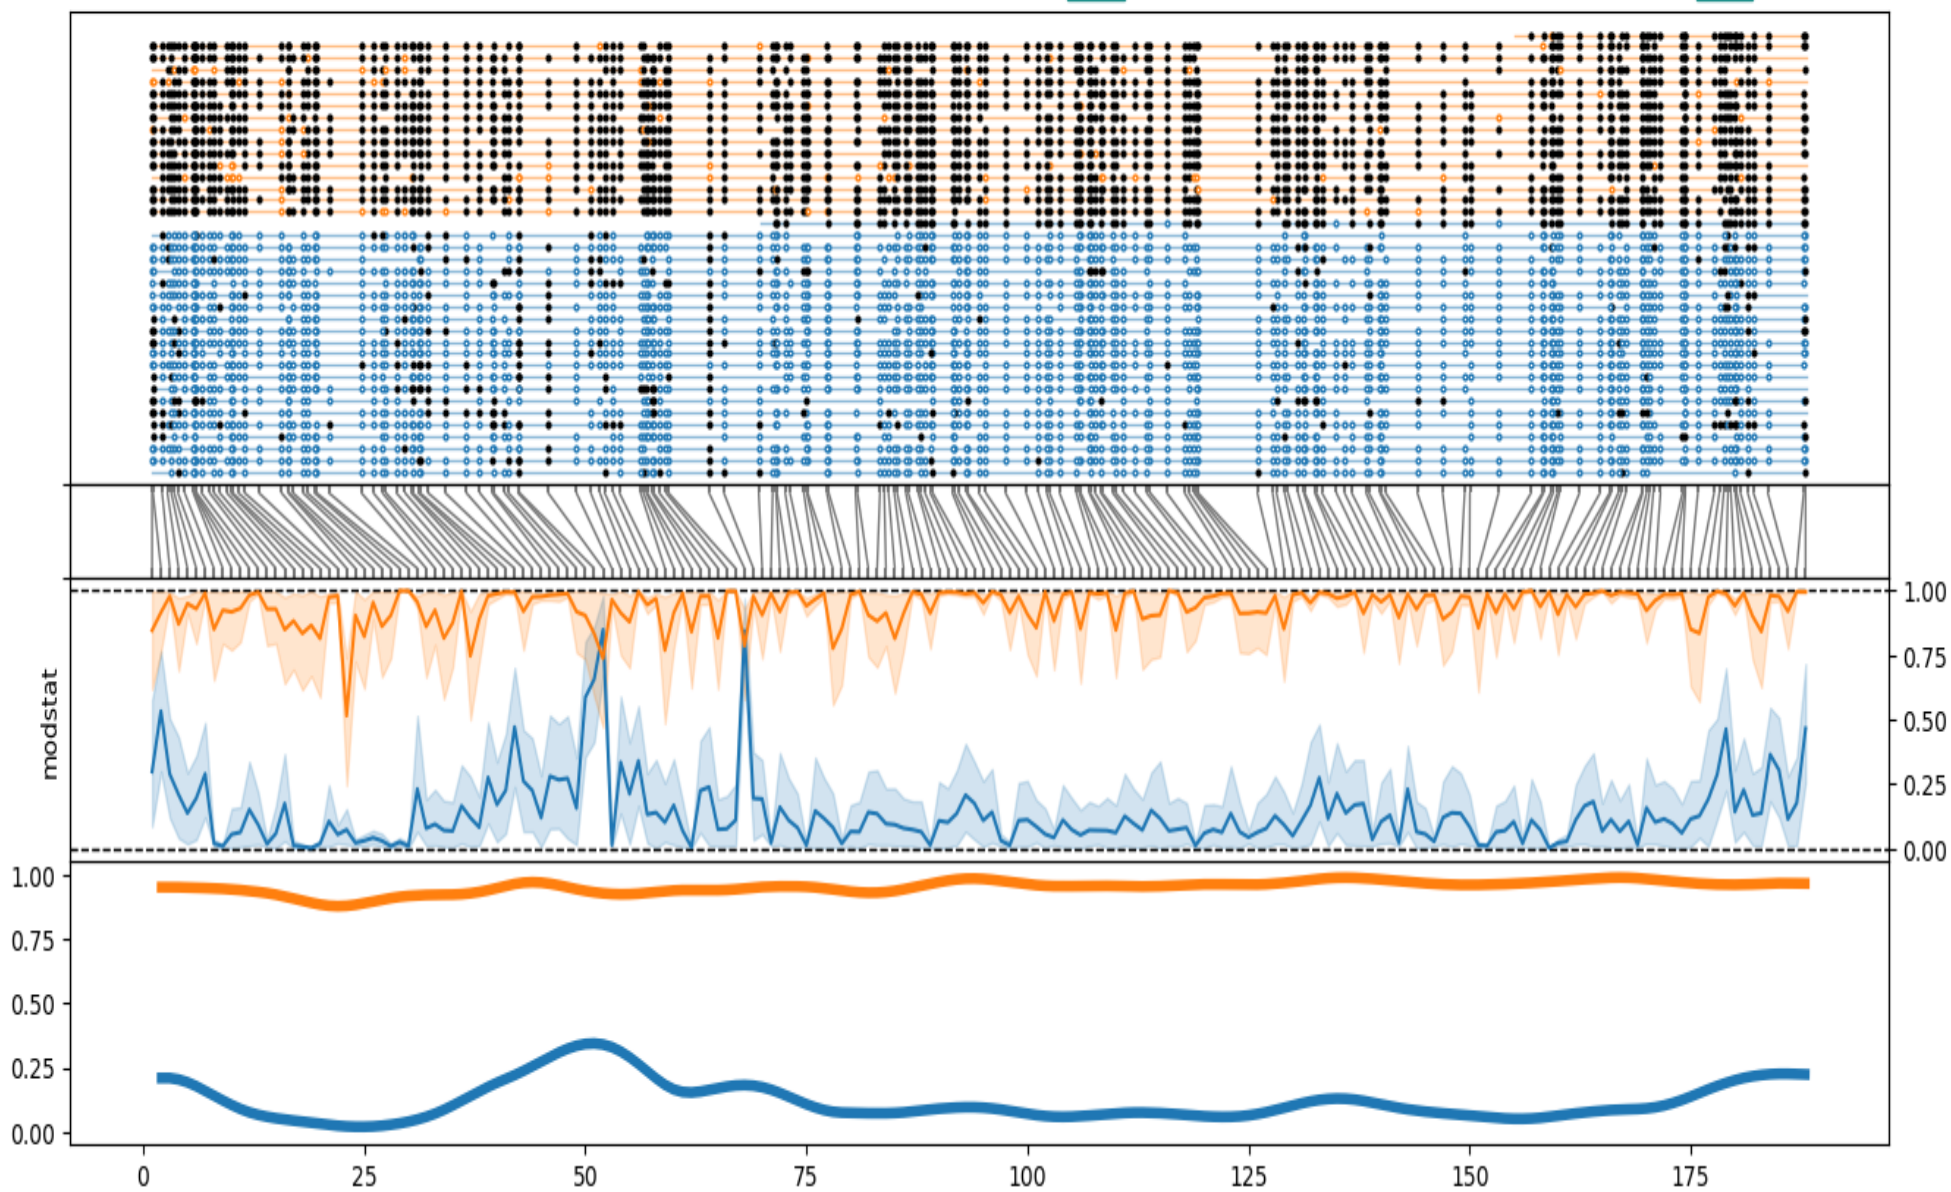

# EPI\_02\_hg38\_phased\_chr14\_100904325\_100905081

chr14 100904356 100904424 100904492 100904560 100904628 100904696 100904764 100904832 100904900 100904968 100905036 100905104

MEG8>>

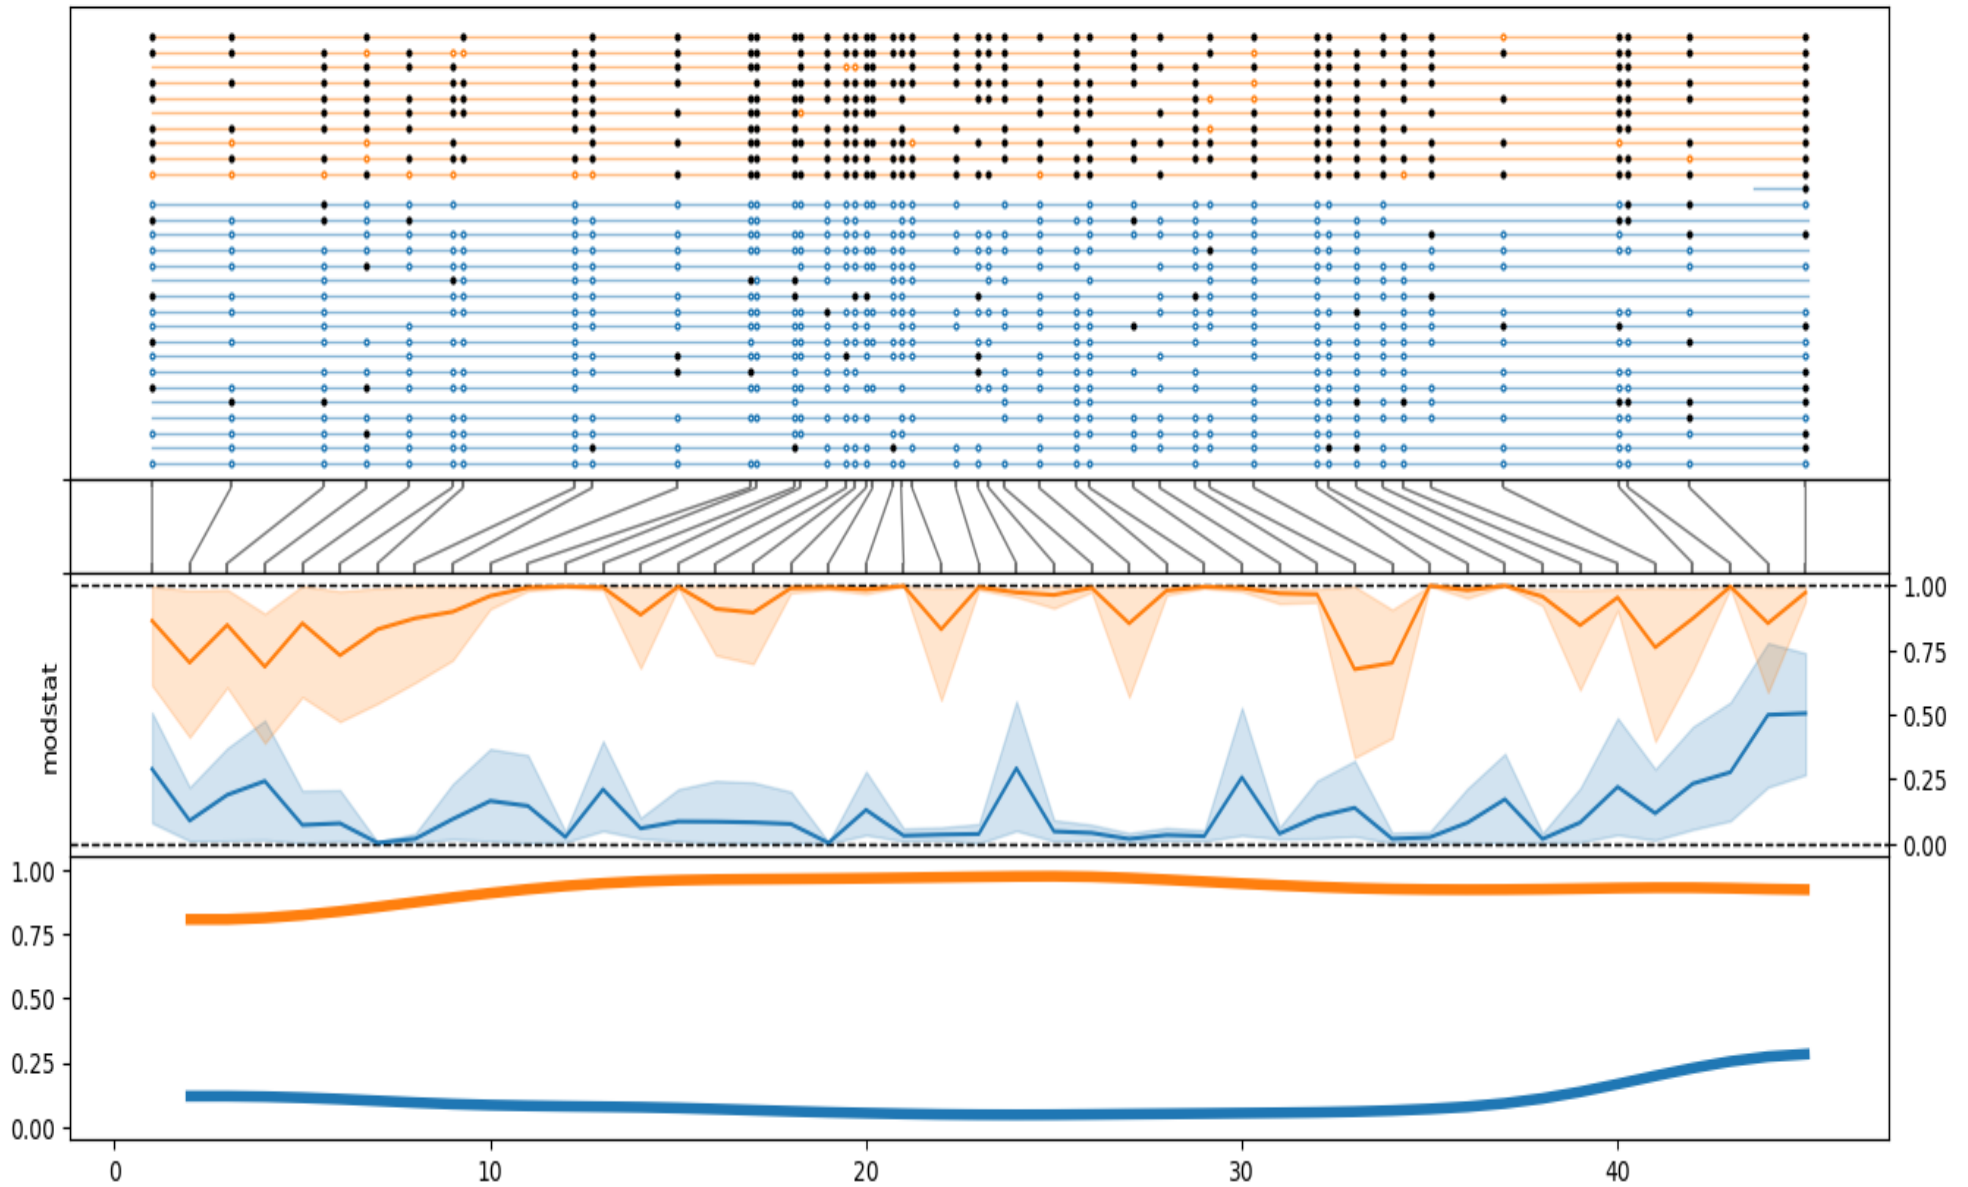



# EPI\_02\_hg38\_phased\_chr15\_23647178\_23648424

chr15:23647229 23647342 23647455 23647568 23647681 23647794 23647907 23648020 23648133 23648246 23648359 23648472

<<MAGEL2

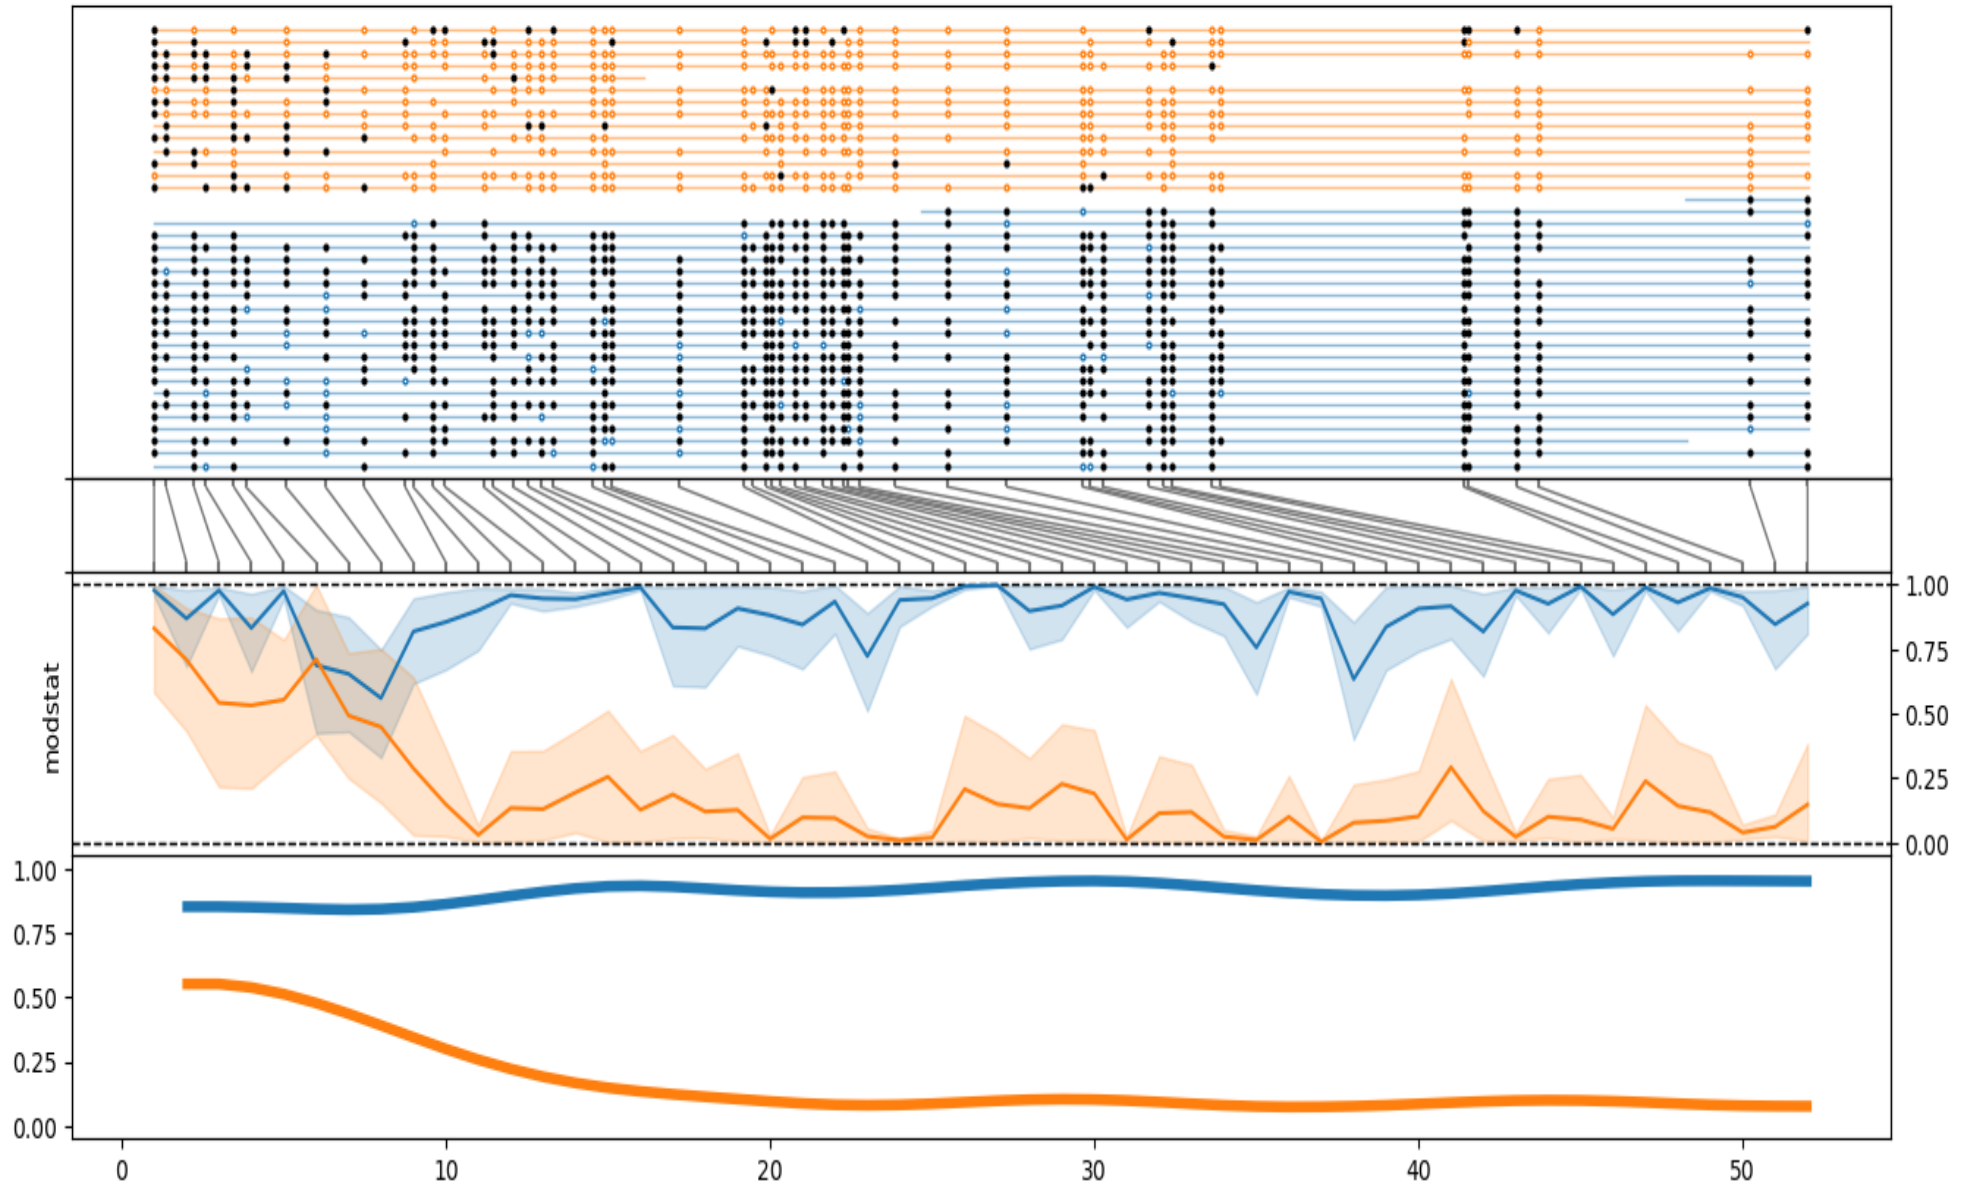

# EPI\_02\_hg38\_phased\_chr15\_24954564\_24956828

chr15:24954657 24954862 24955067 24955272 24955477 24955682 24955887 24956092 24956297 24956502 24956707 24956912

SNRPN>>

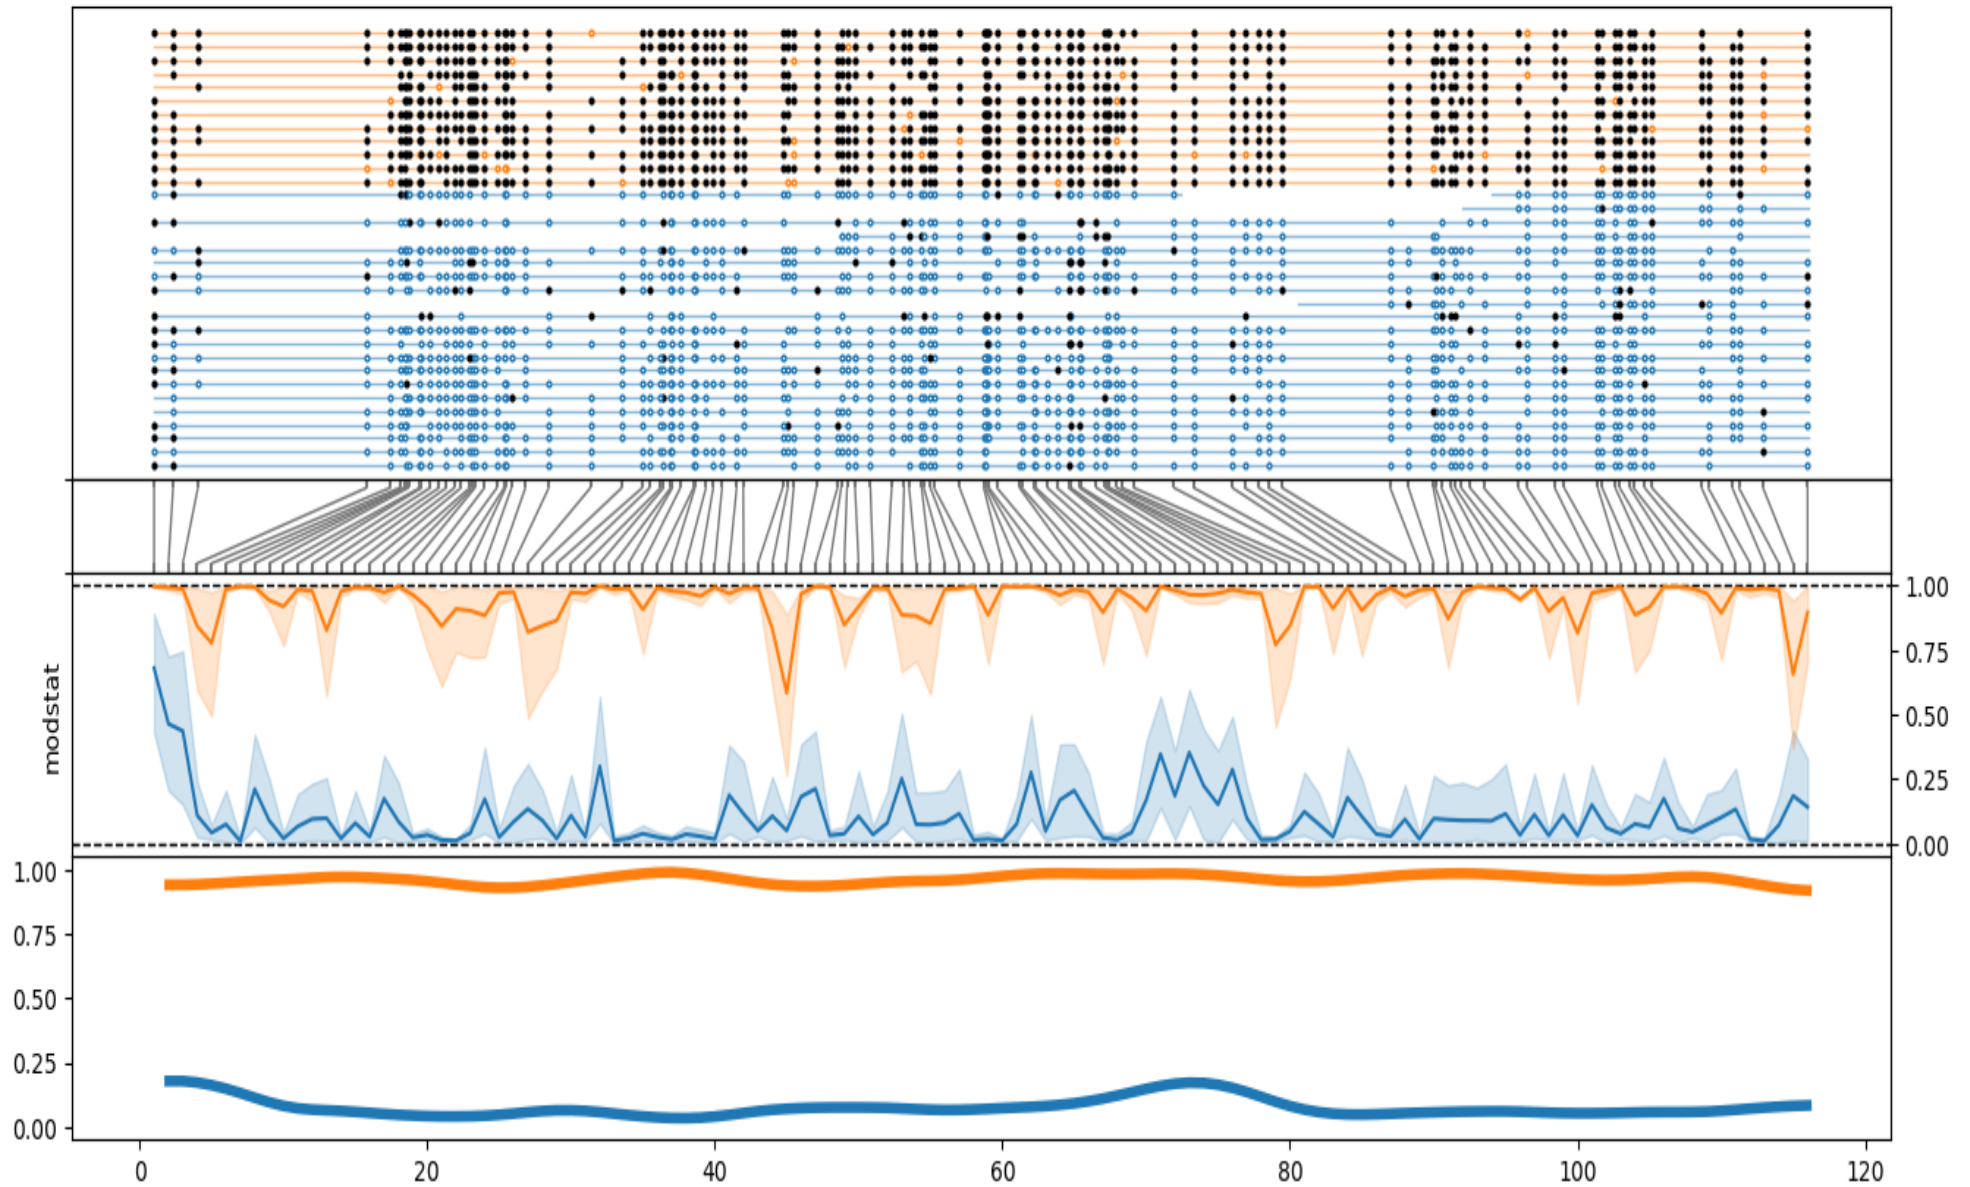

# EPI\_02\_hg38\_phased\_chrX\_134372110\_134374891

chrX 134372223 134372475 134372727 134372979 134373231 134373483 134373735 134373987 134374239 134374491 134374743 134374995

PHF6>>

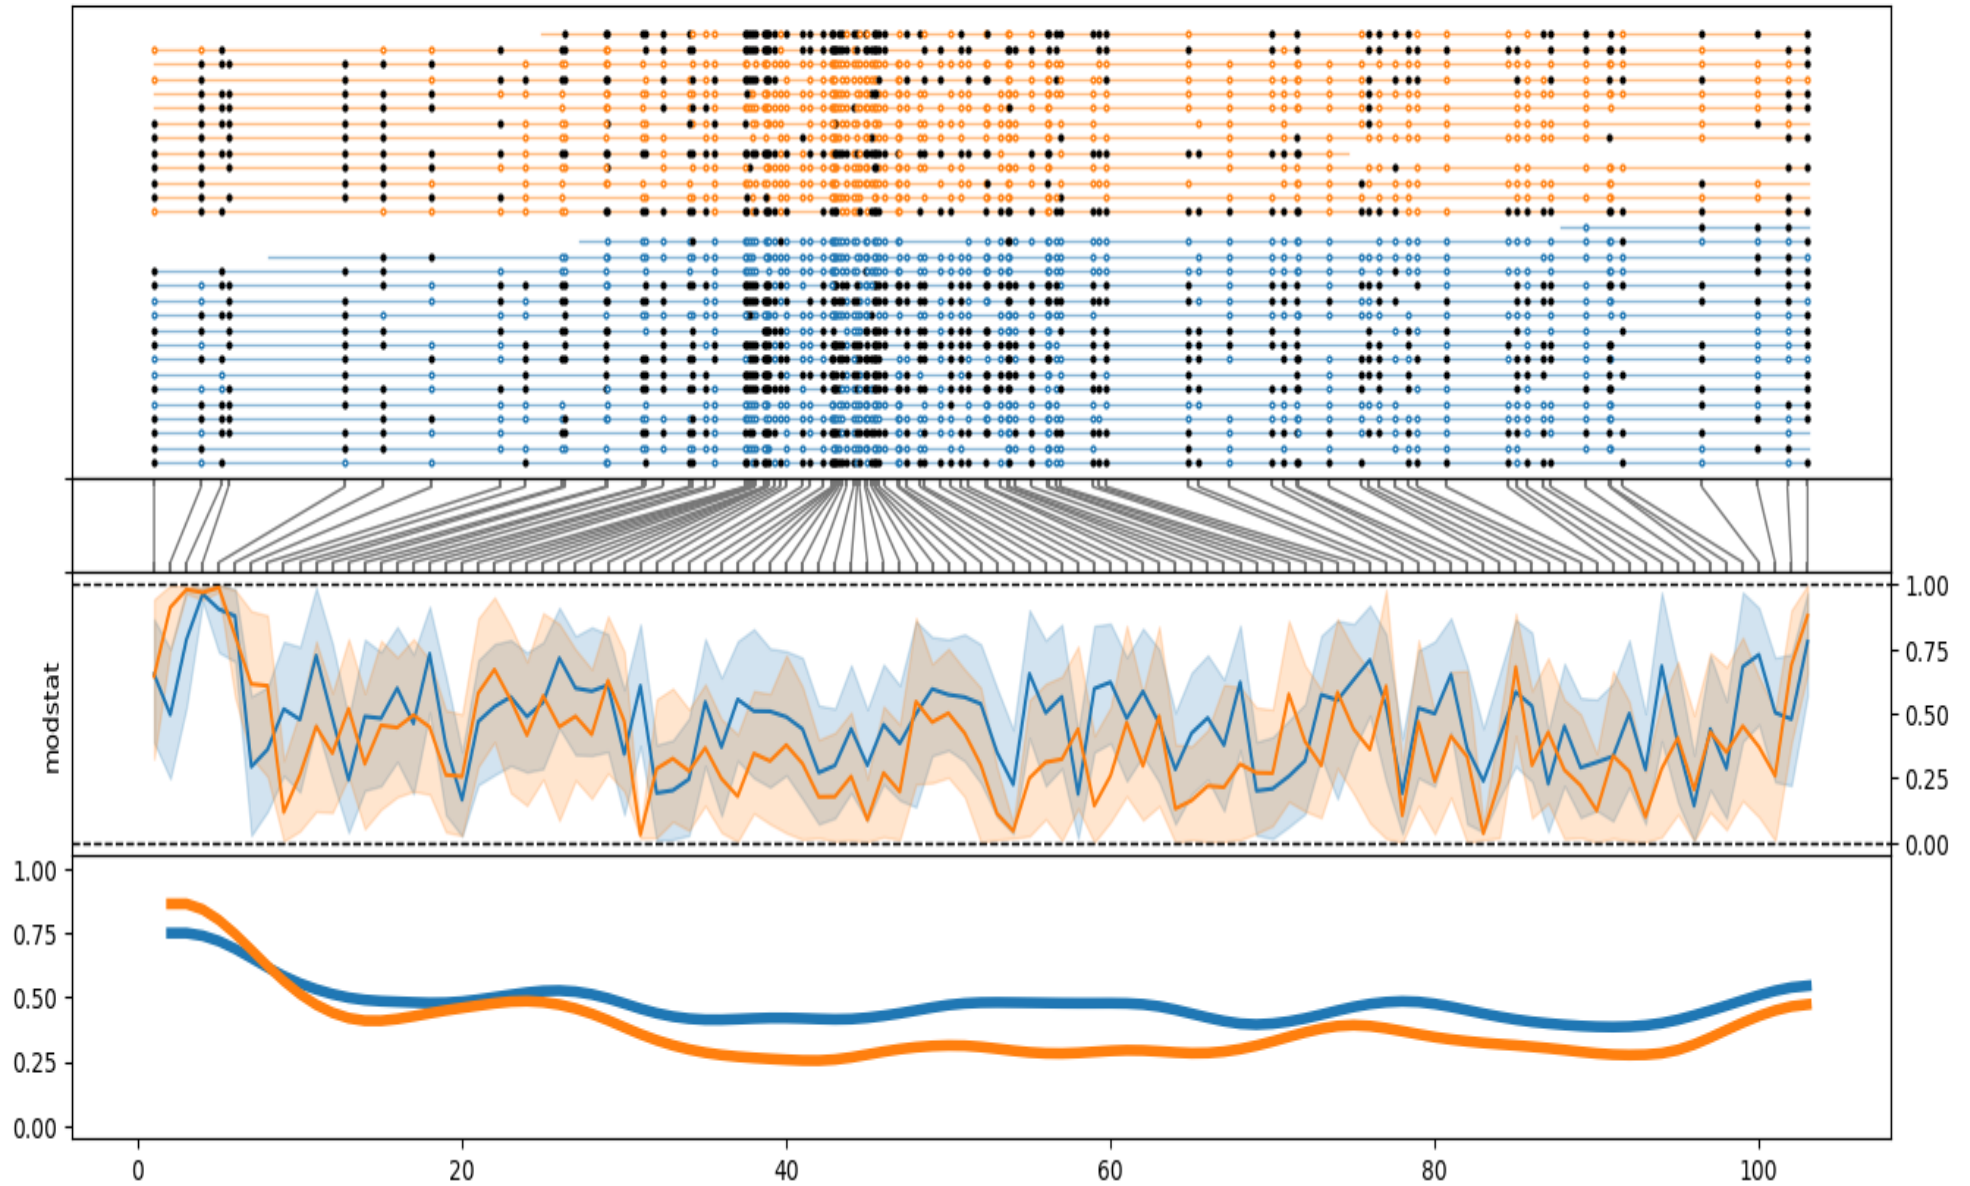

# EPI\_02\_hg38\_phased\_chrX\_46836539\_46837273

chrX:46836569 46836635 46836701 46836767 46836833 46836899 46836965 46837031 46837097 46837163 46837229 46837295

RP2>>

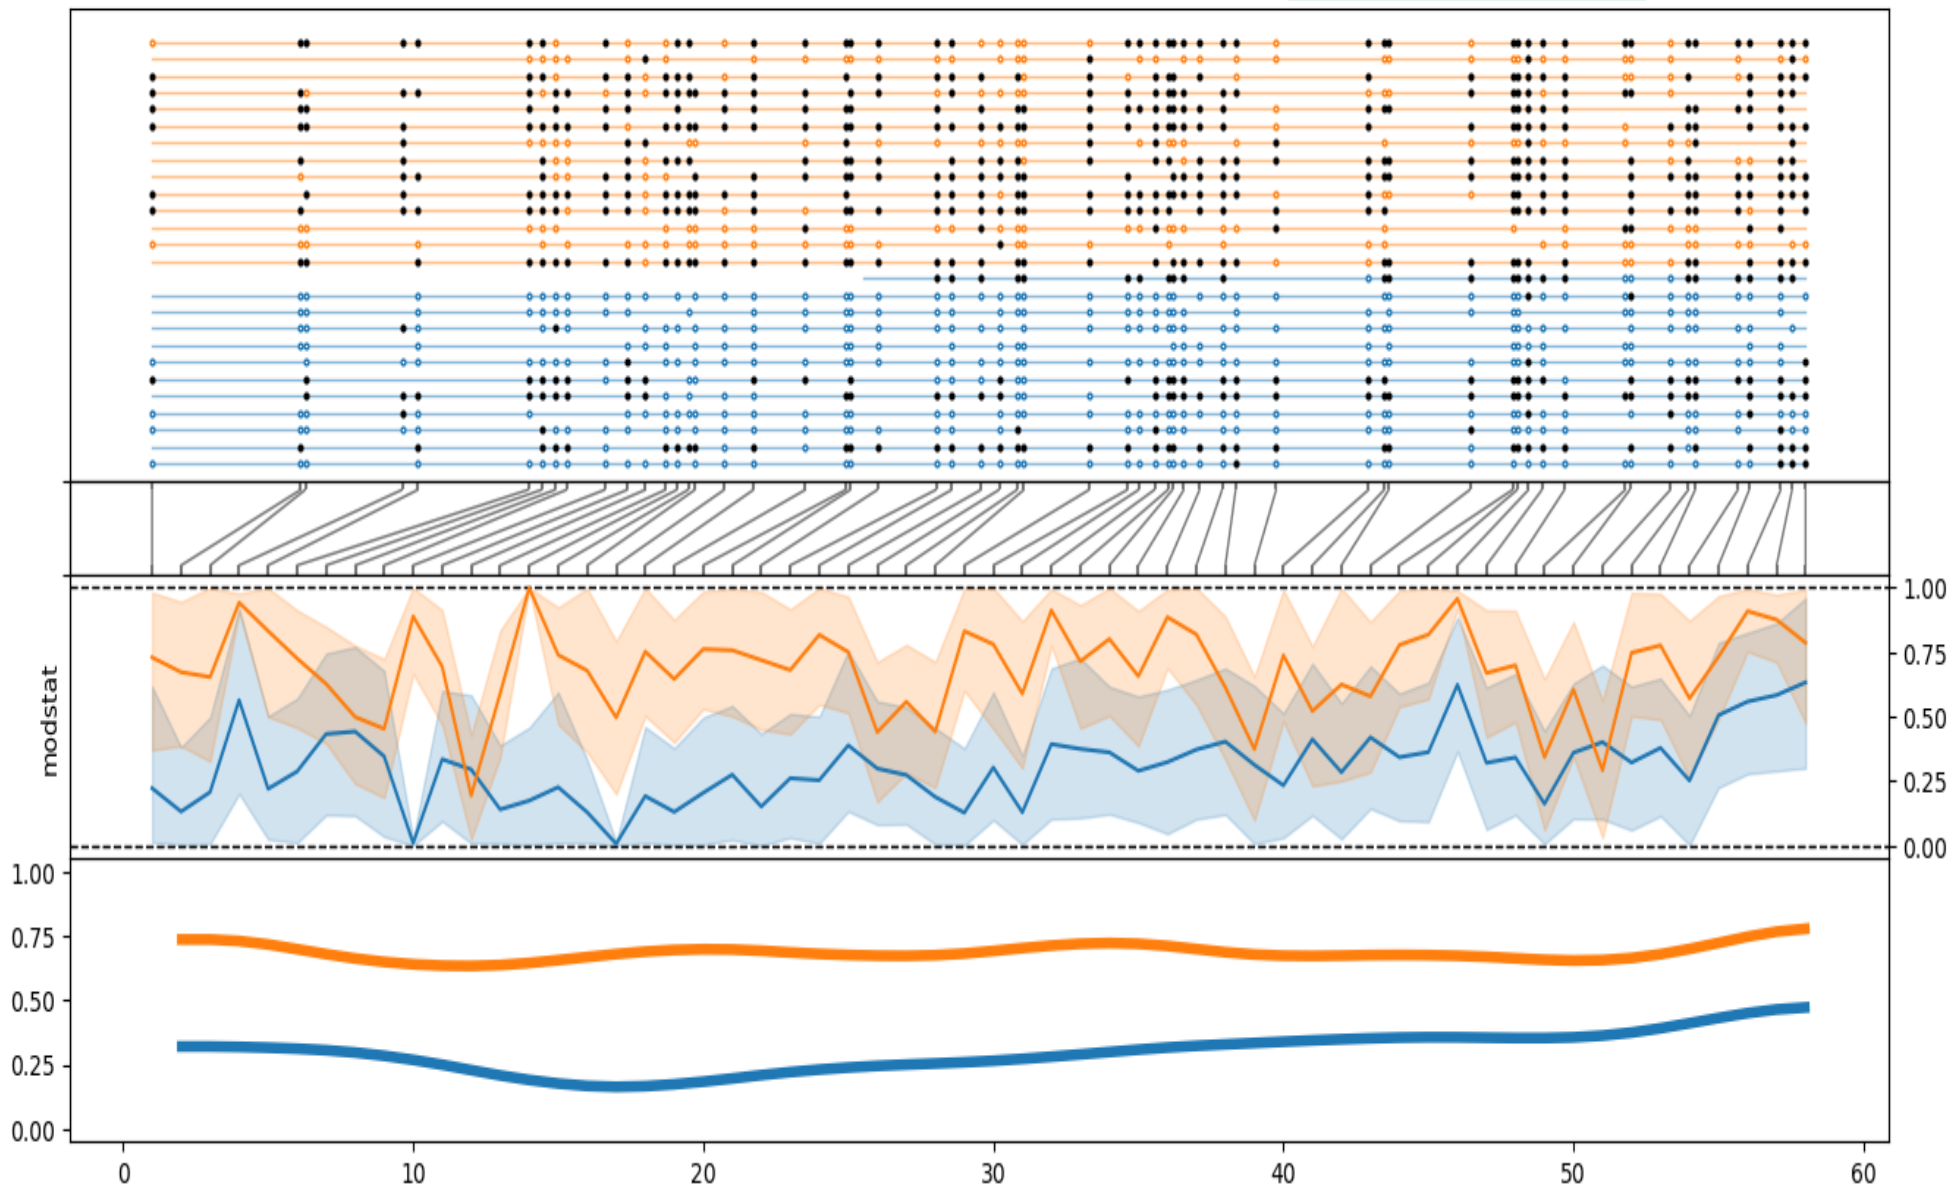



# EPI\_02\_hg38\_phased\_chrX\_67543761\_67546170

chr67543860 67544079 67544298 67544517 67544736 67544955 67545174 67545393 67545612 67545831 67546050 67546269

AR>>

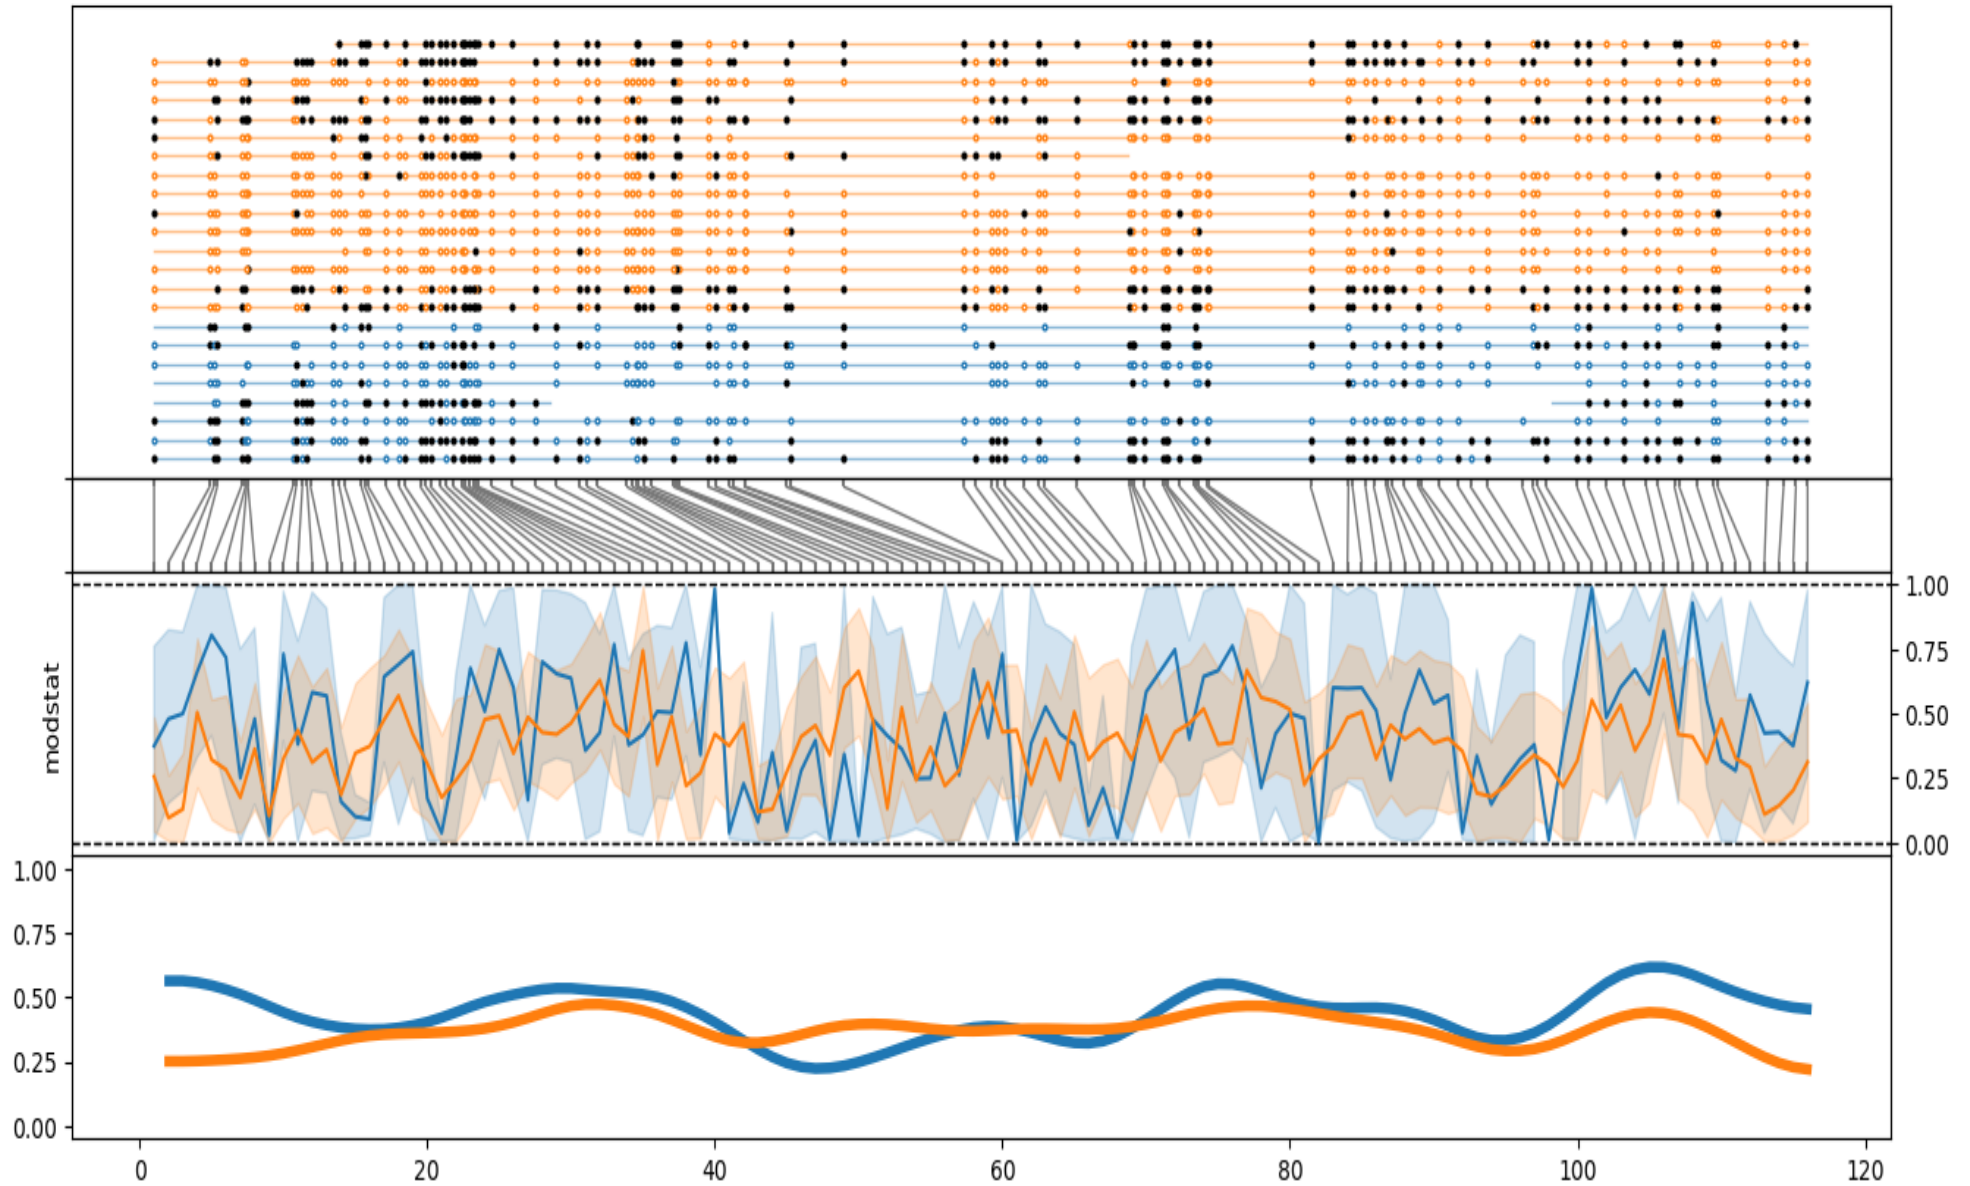



# EPI\_03\_hg38\_phased\_chr11\_1997509\_2003349

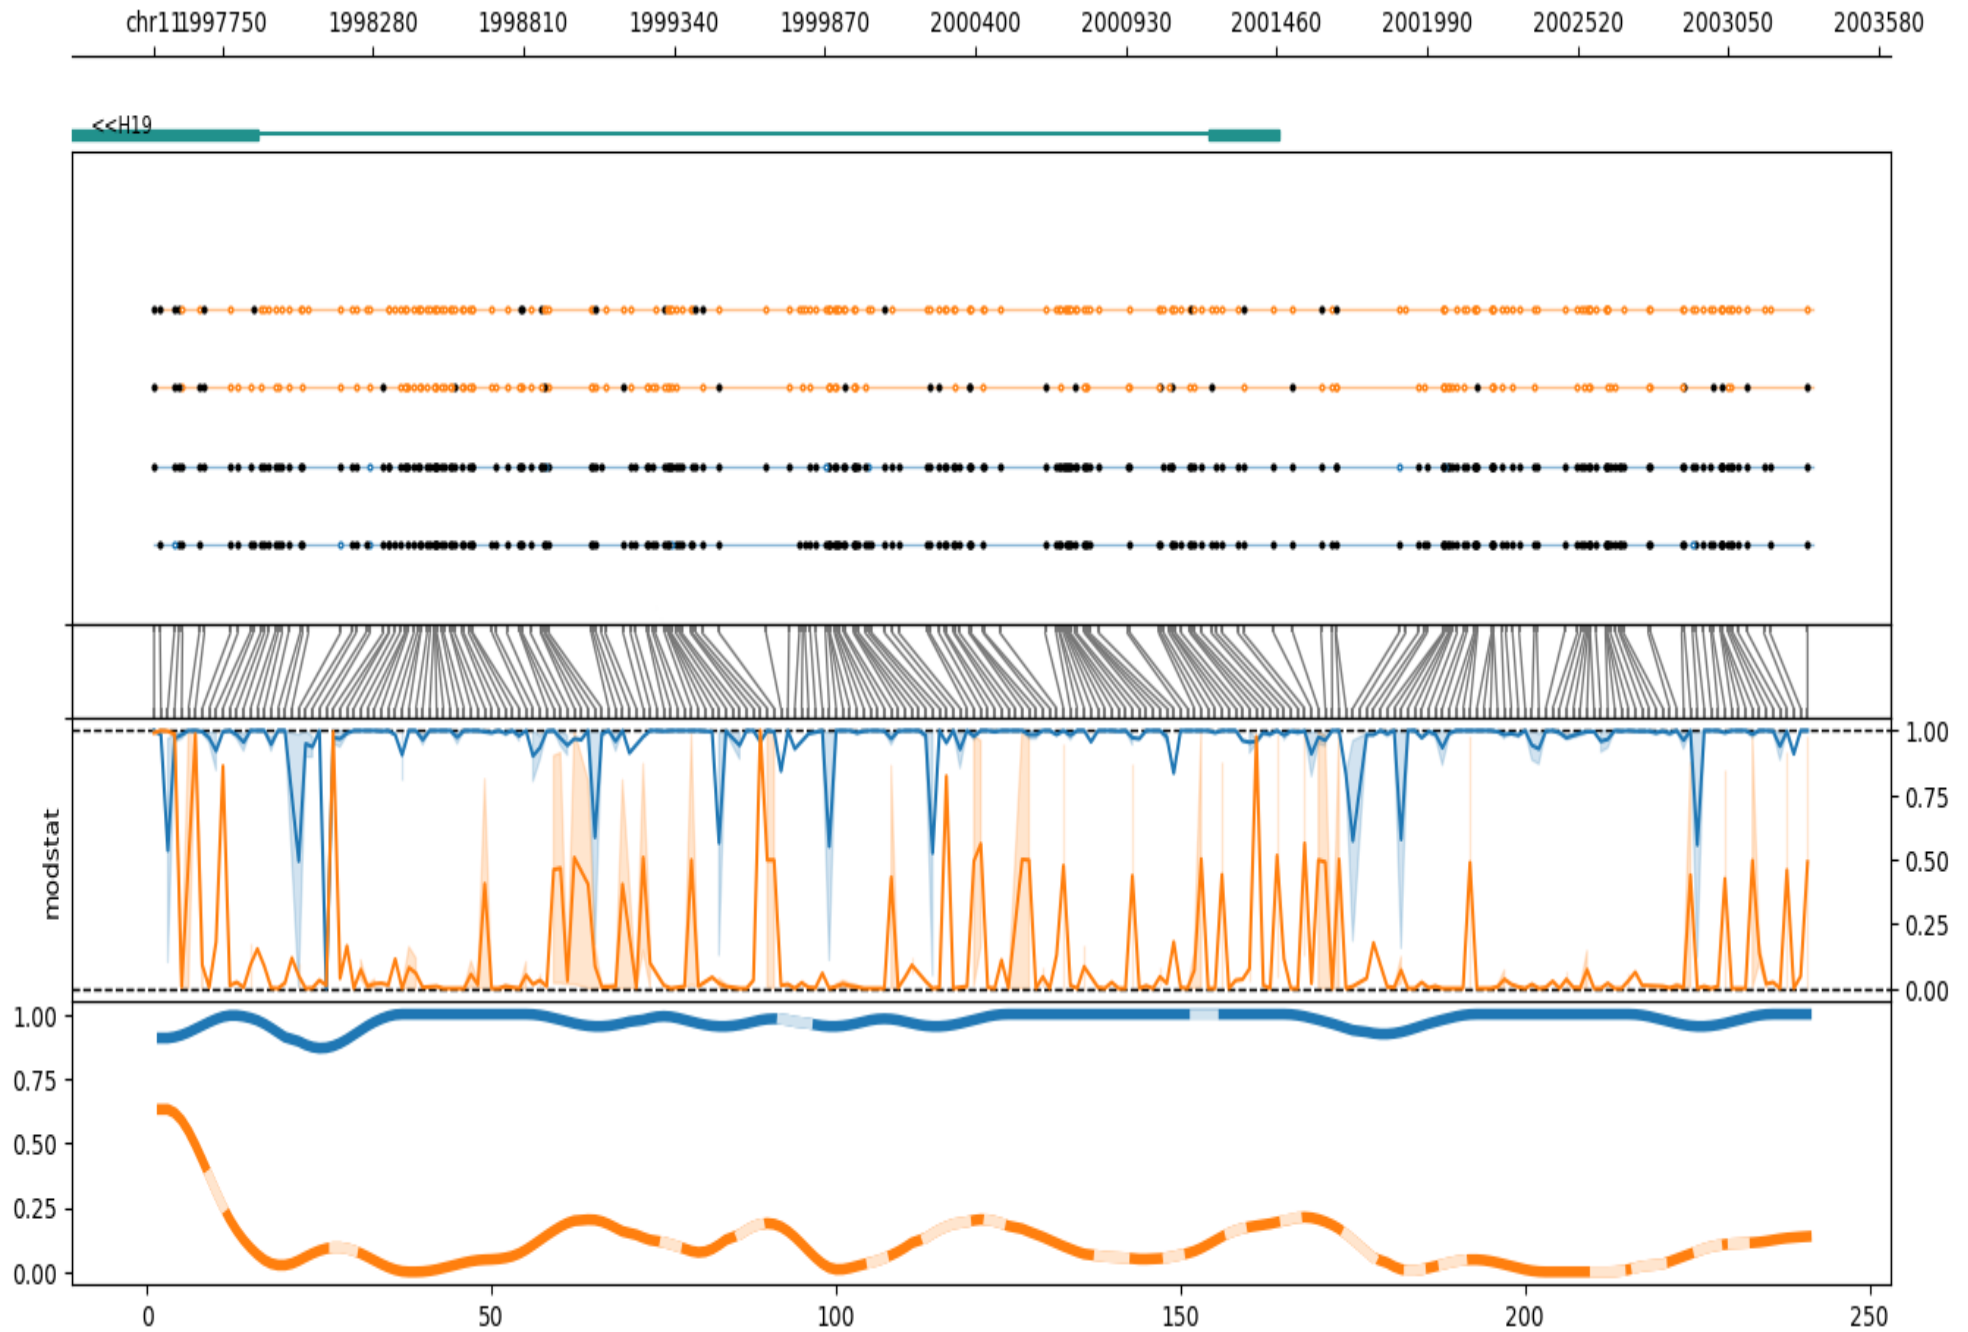

# EPI\_03\_hg38\_phased\_chr11\_2698155\_2701028

chr11:2698274 2698535 2698796 2699057 2699318 2699579 2699840 2700101 2700362 2700623 2700884 2701145

KCNQ1>>

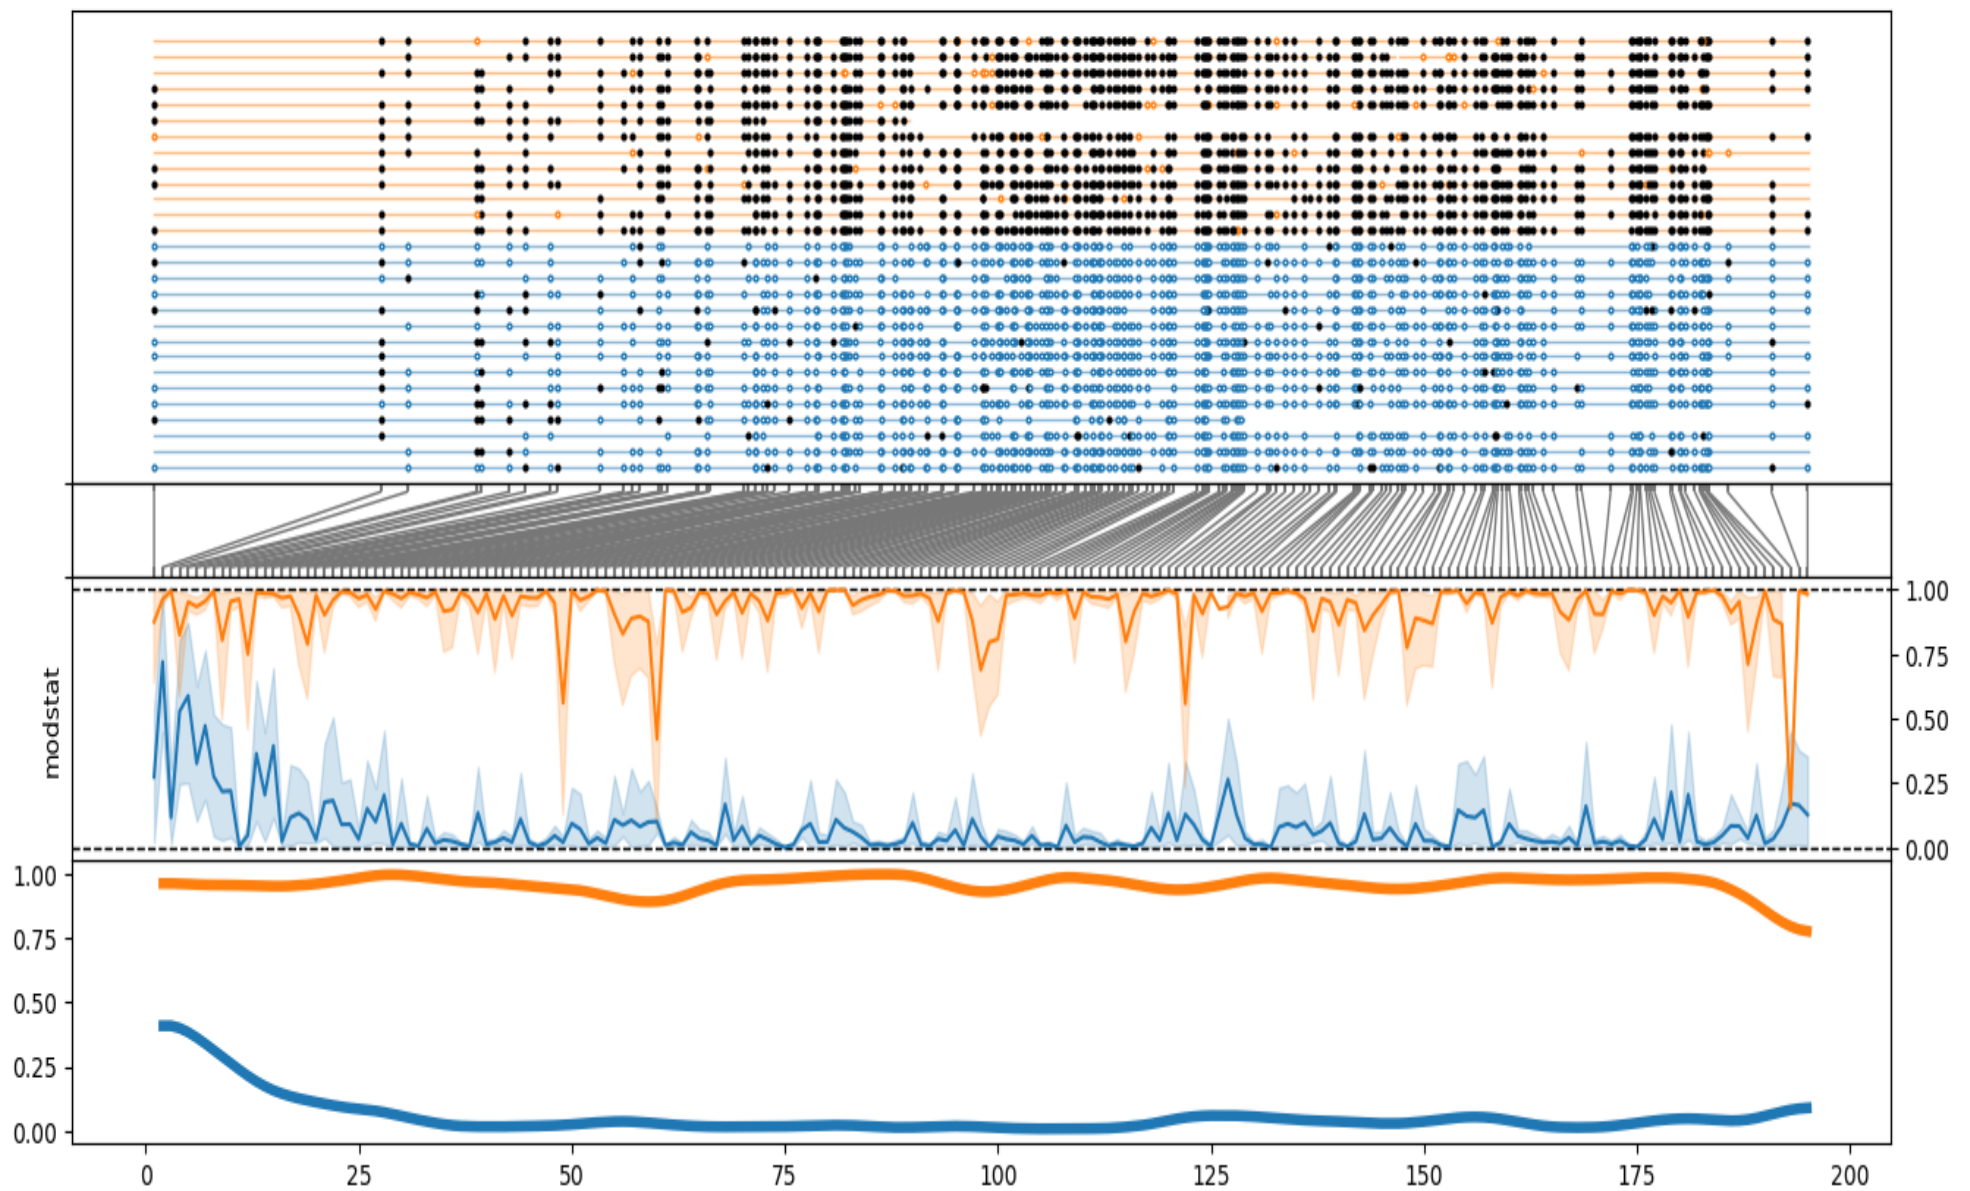

# EPI\_03\_hg38\_phased\_chr14\_100824185\_100827640

chr14 100824328 100824642 100824956 100825270 100825584 100825898 100826212 100826526 100826840 100827154 100827468 100827782

MEG3>>

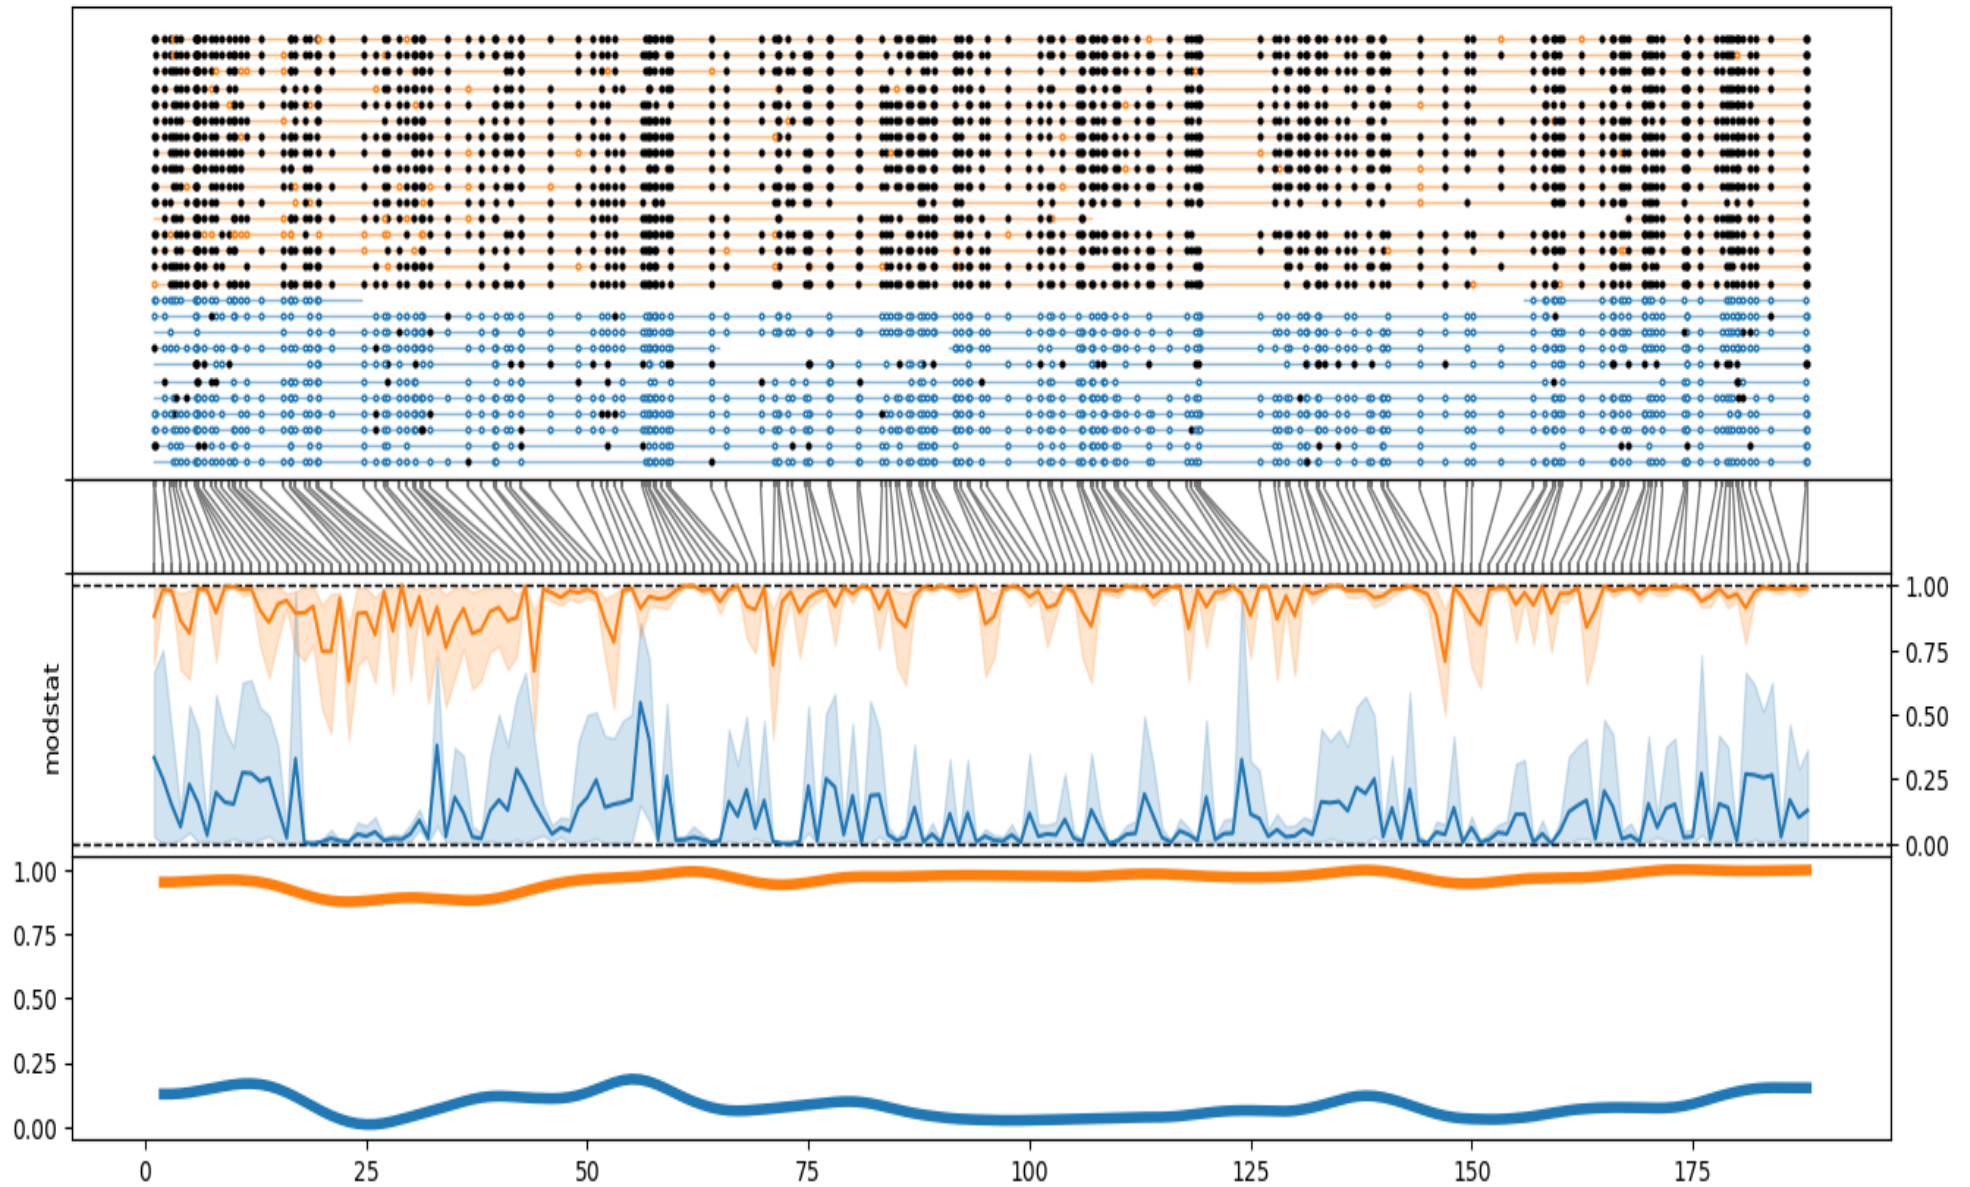

# EPI\_03\_hg38\_phased\_chr14\_100904325\_100905081

chr14 100904356 100904424 100904492 100904560 100904628 100904696 100904764 100904832 100904900 100904968 100905036 100905104

MEG8>>

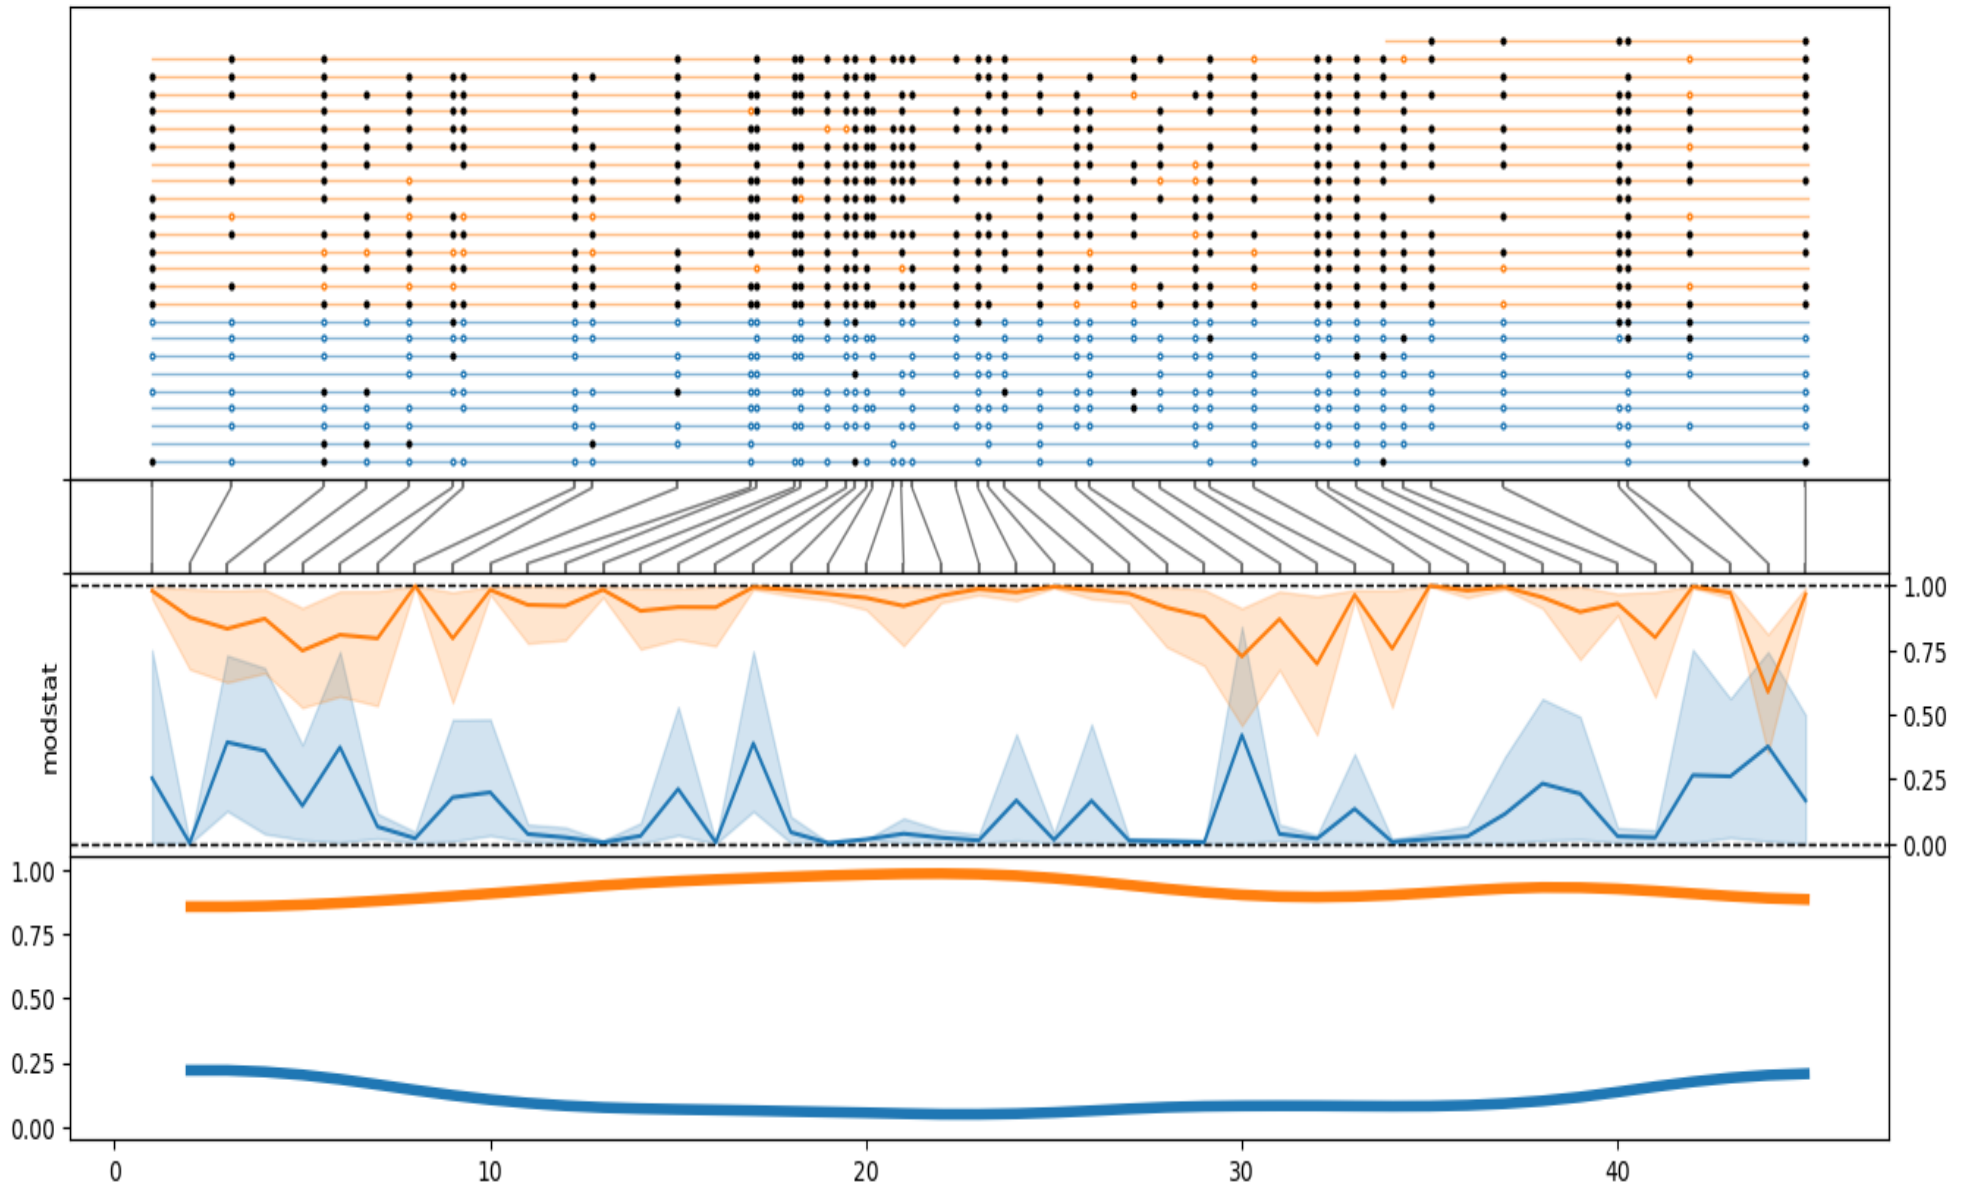



# EPI\_03\_hg38\_phased\_chr15\_23647178\_23648424

chr15 23647229 23647342 23647455 23647568 23647681 23647794 23647907 23648020 23648133 23648246 23648359 23648472

<<MAGEL2

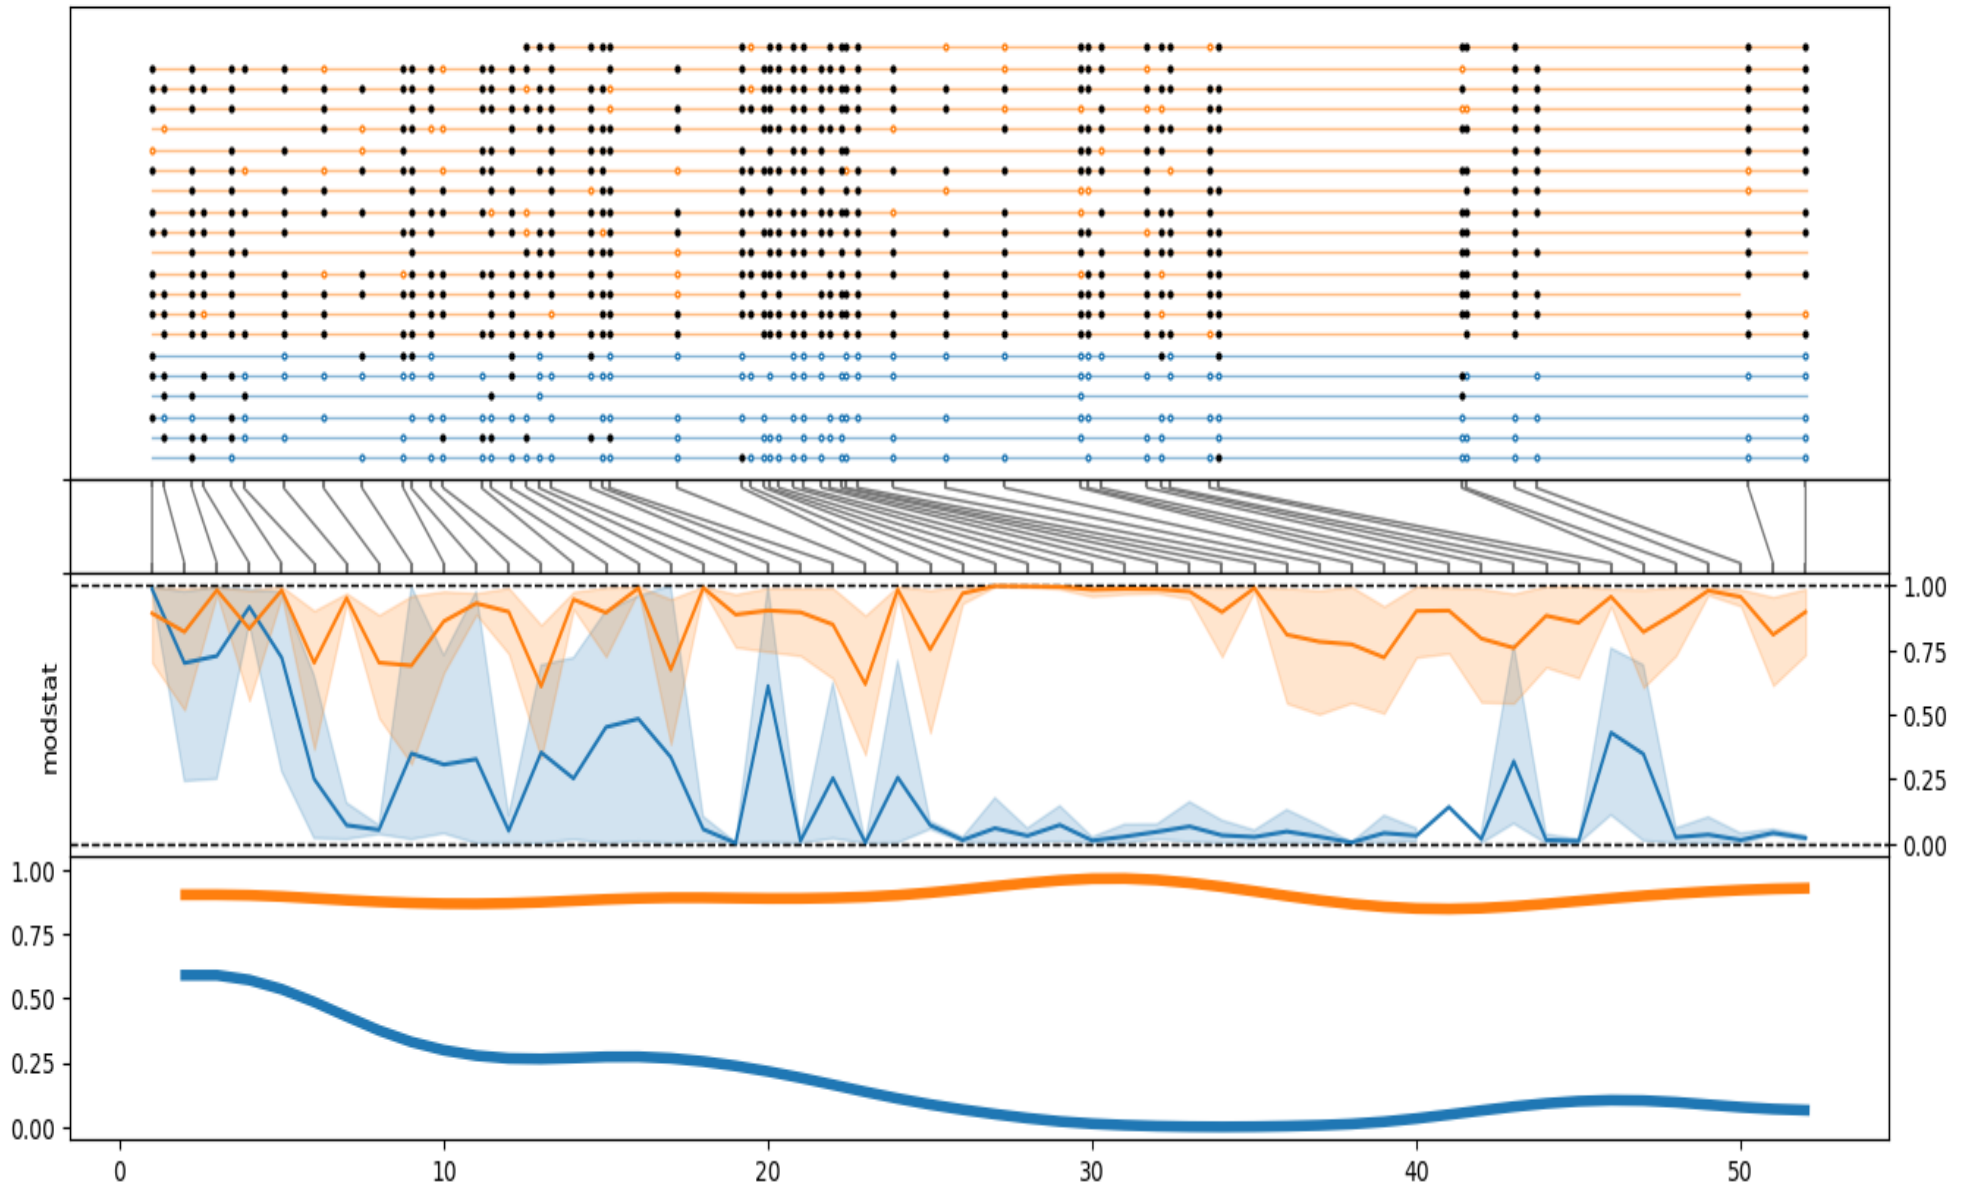



# EPI\_03\_hg38\_phased\_chr15\_24954564\_24956828

chr15 24954657 24954862 24955067 24955272 24955477 24955682 24955887 24956092 24956297 24956502 24956707 24956912

SNRPN>>

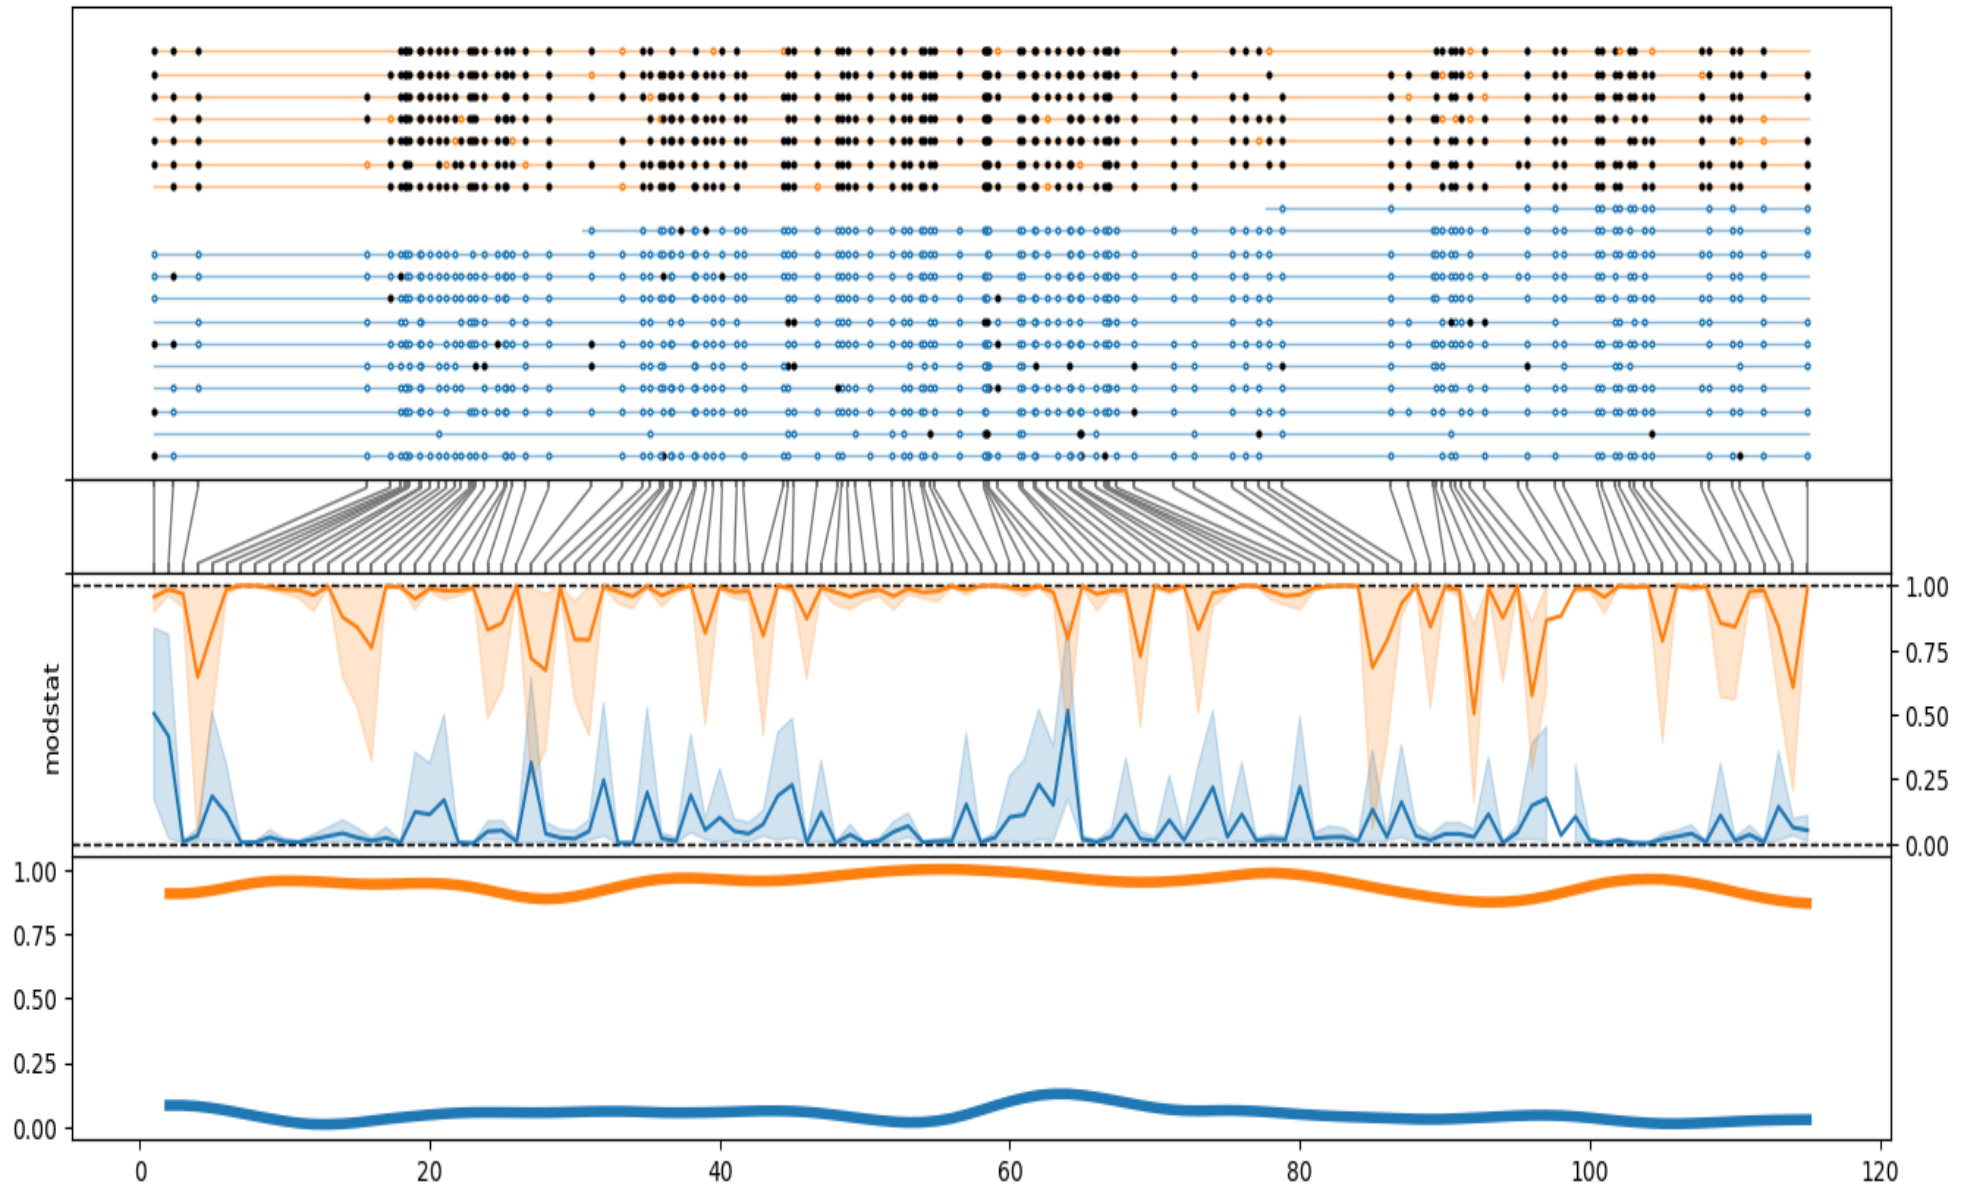

# EPI\_04\_hg38\_phased\_chr11\_1997509\_2003349

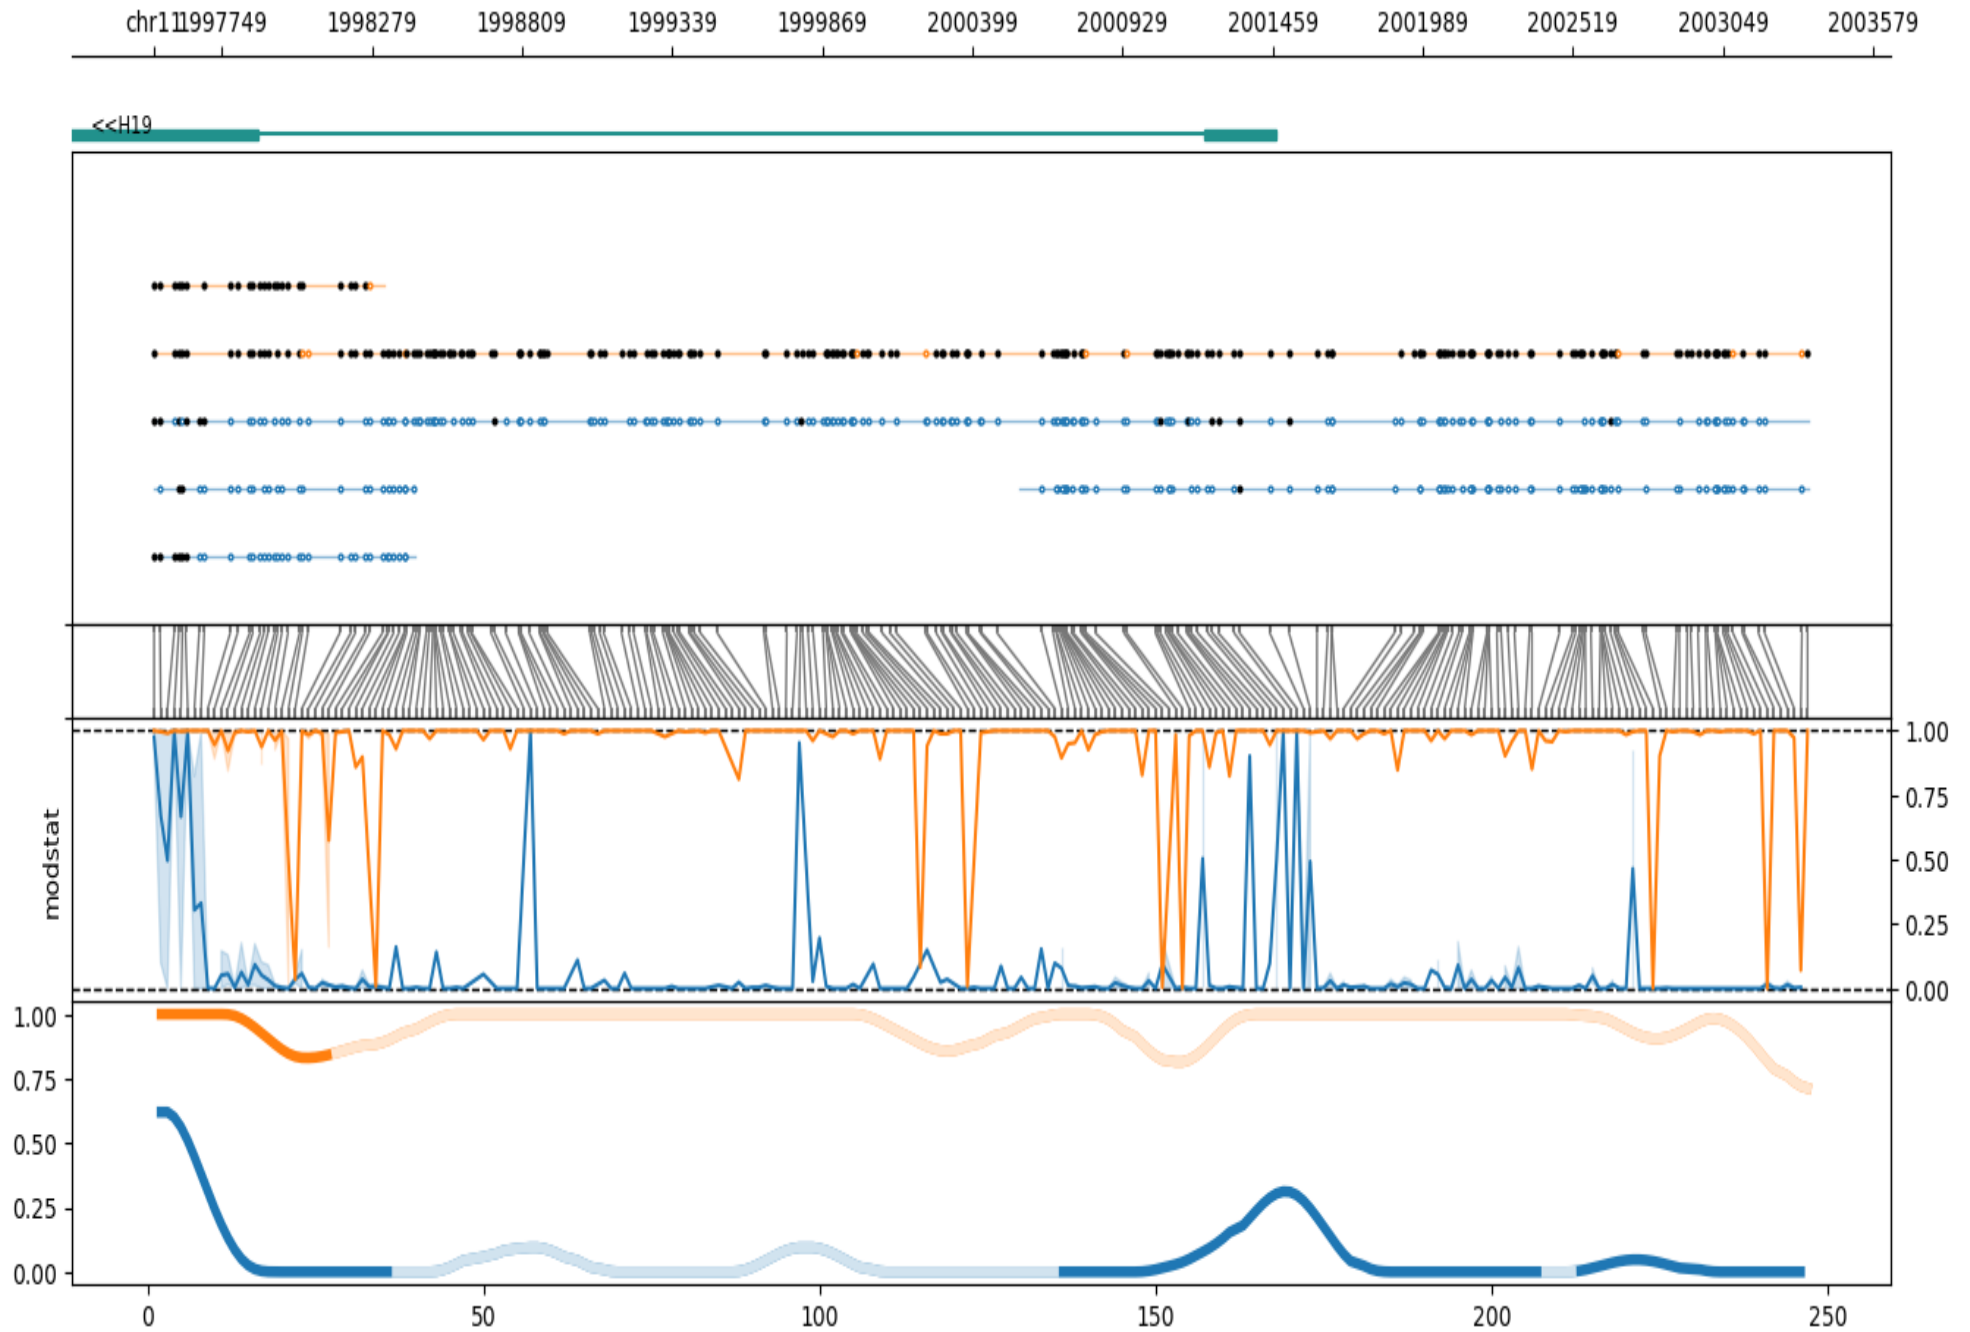

# EPI\_04\_hg38\_phased\_chr11\_2698155\_2701028

chr11:2698274 2698535 2698796 2699057 2699318 2699579 2699840 2700101 2700362 2700623 2700884 2701145

KCNQ1>>

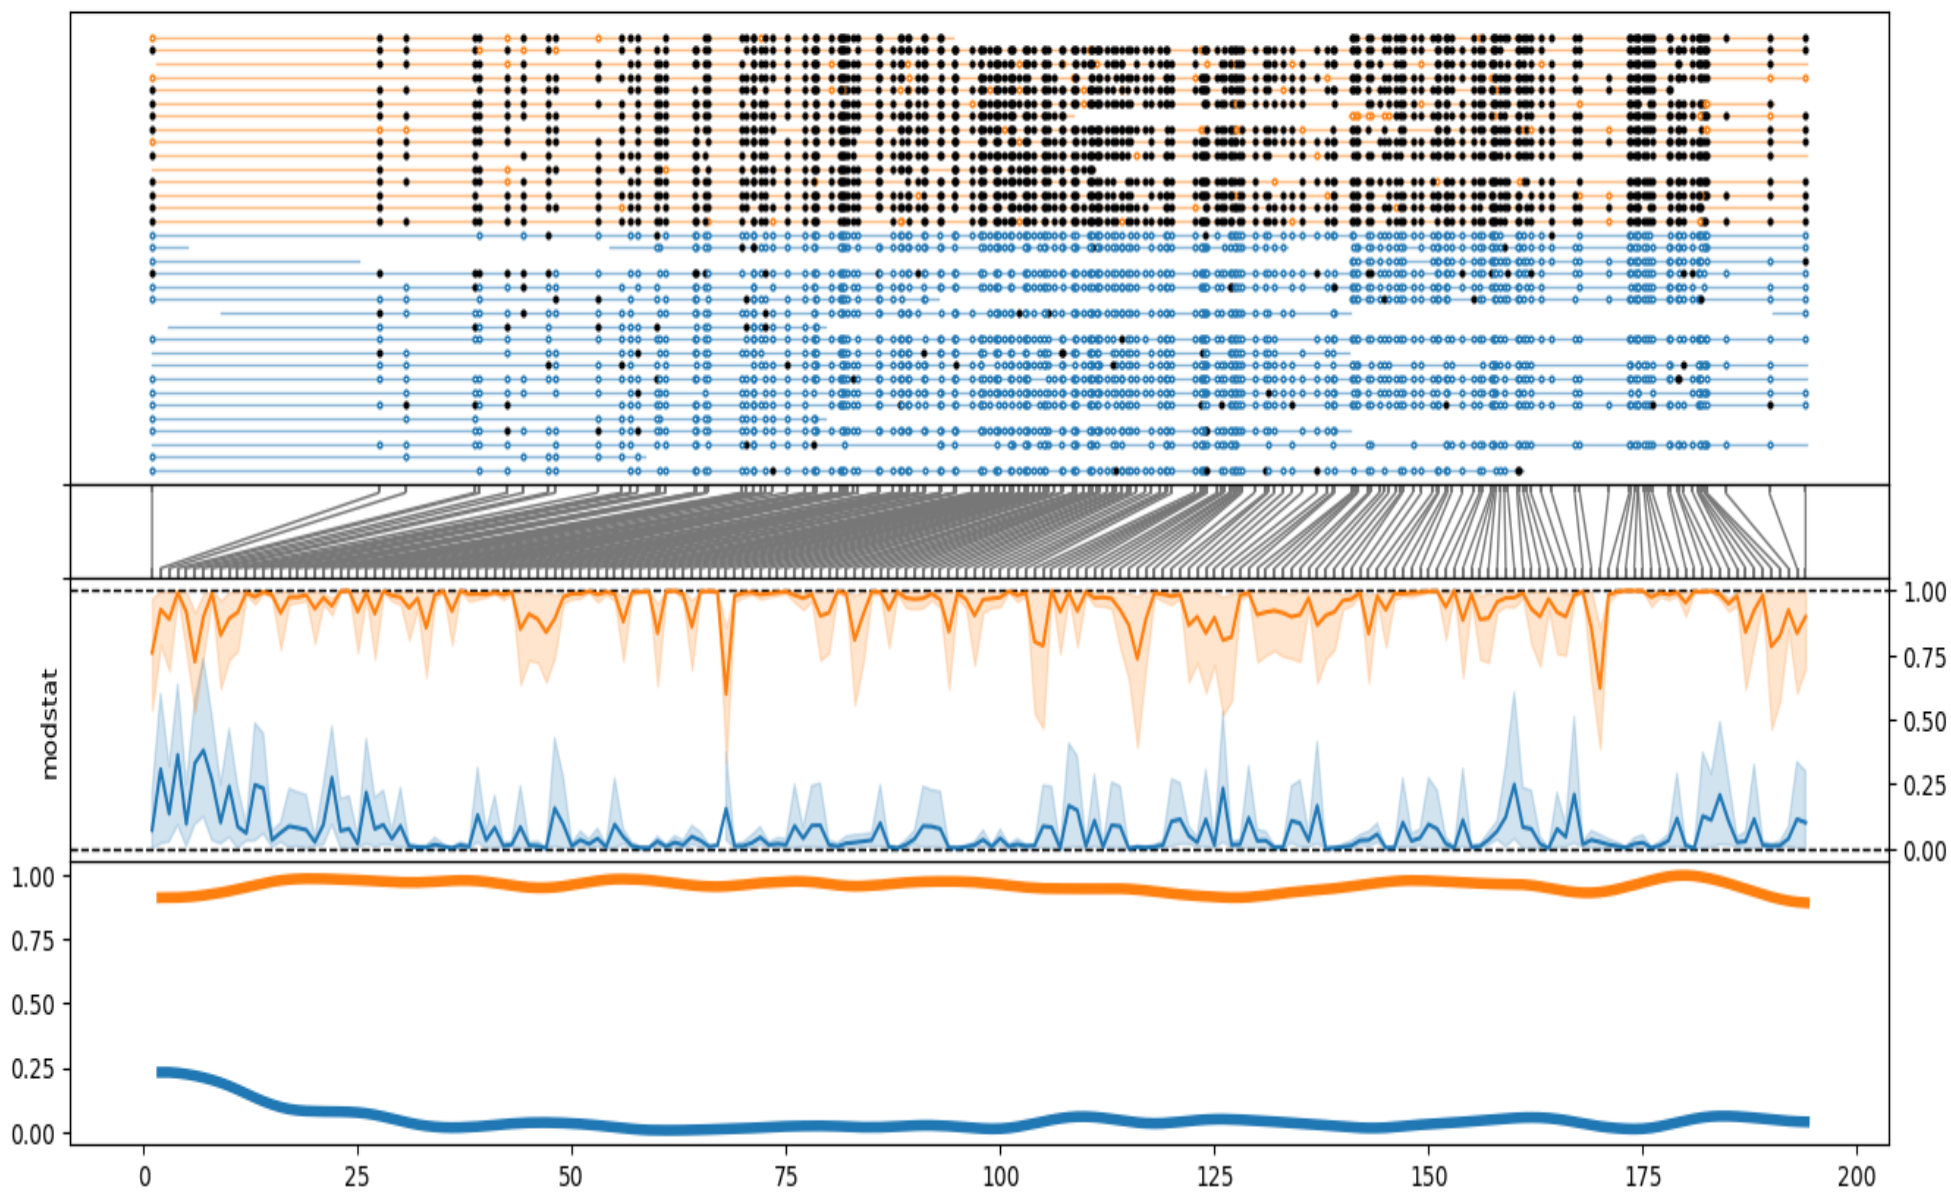

# EPI\_04\_hg38\_phased\_chrom14\_100824185\_100827640

chr14 100824328 100824642 100824956 100825270 100825584 100825898 100826212 100826526 100826840 100827154 100827468 100827782

MEG3>>

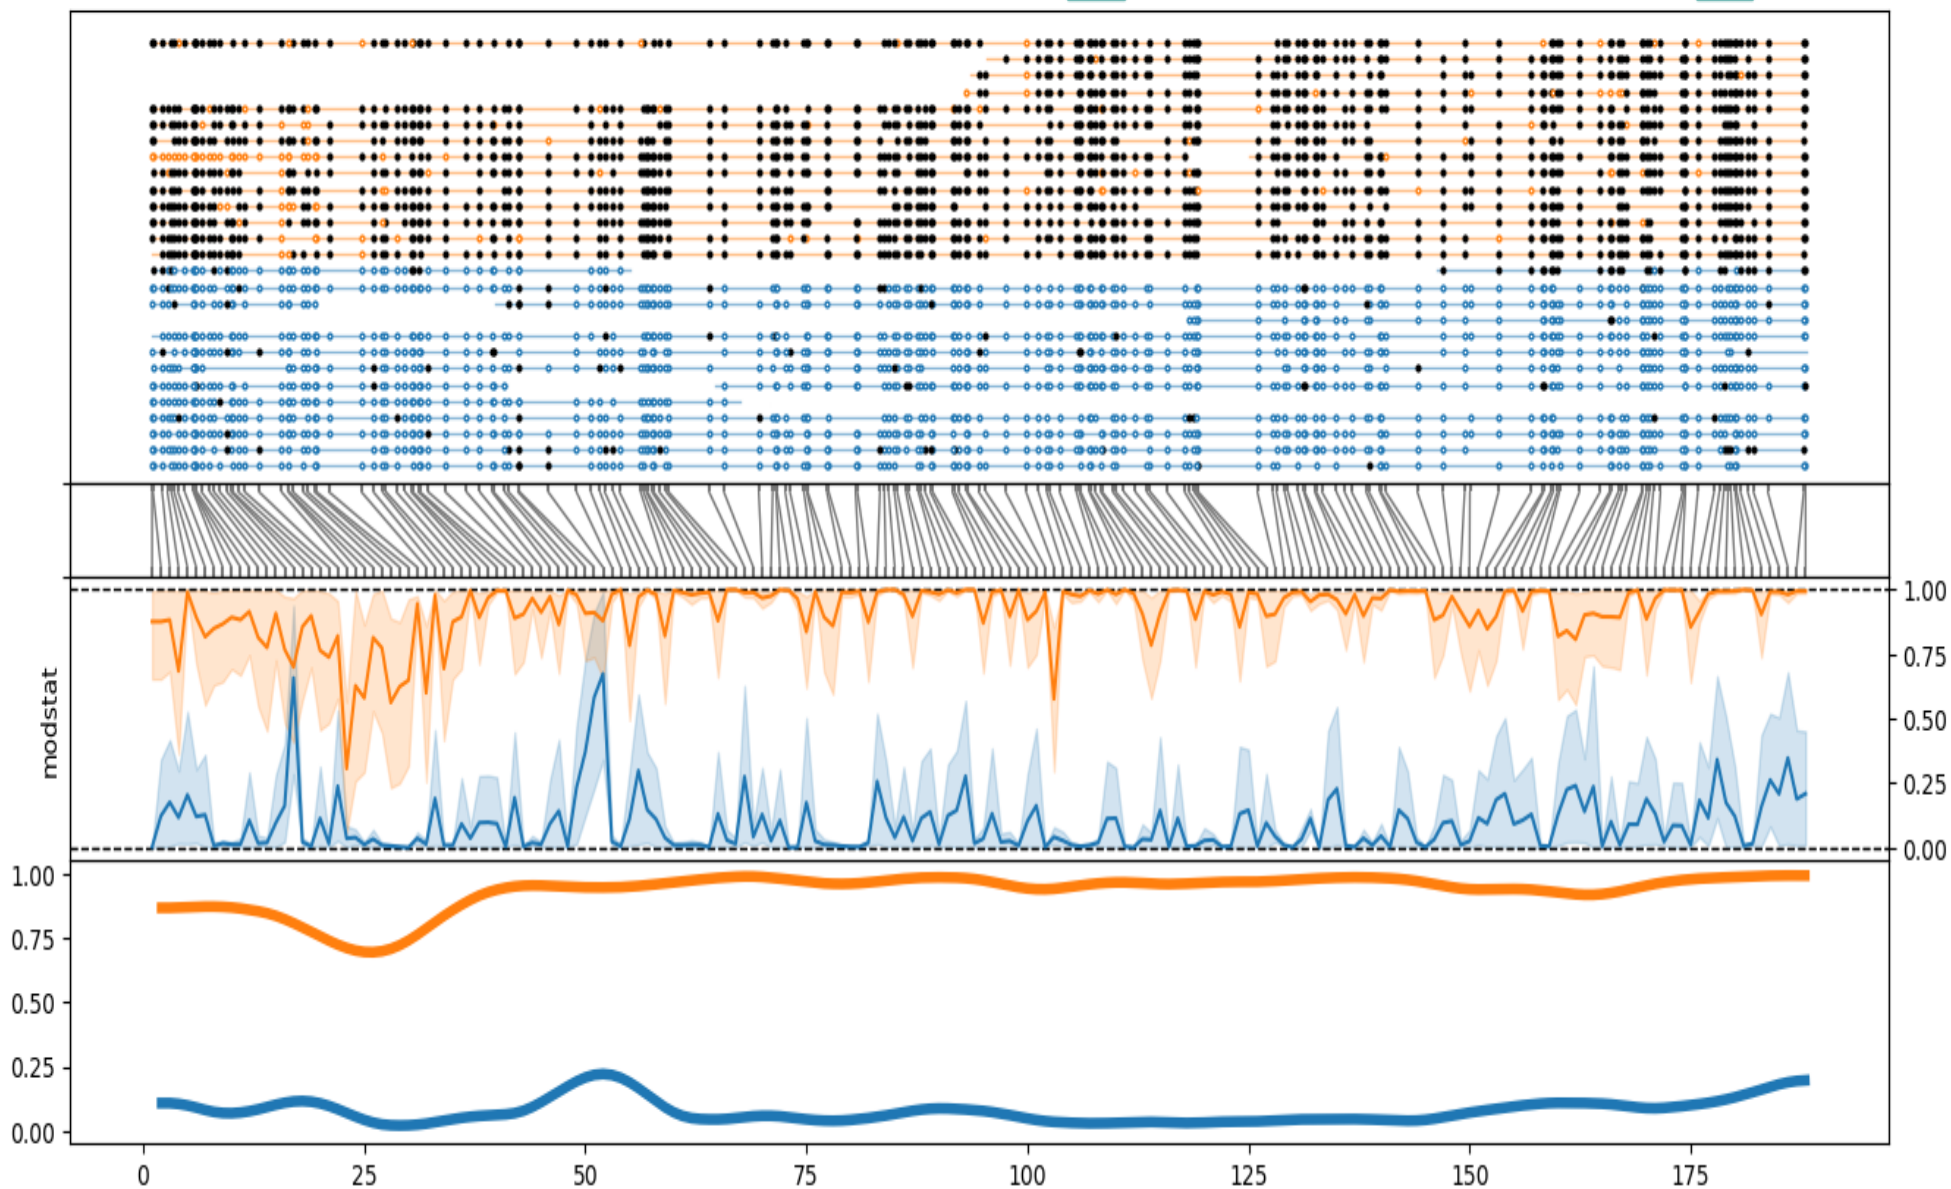



# EPI\_04\_hg38\_phased\_chr14\_100904325\_100905081

chr14 100904356 100904424 100904492 100904560 100904628 100904696 100904764 100904832 100904900 100904968 100905036 100905104

MEG8>>

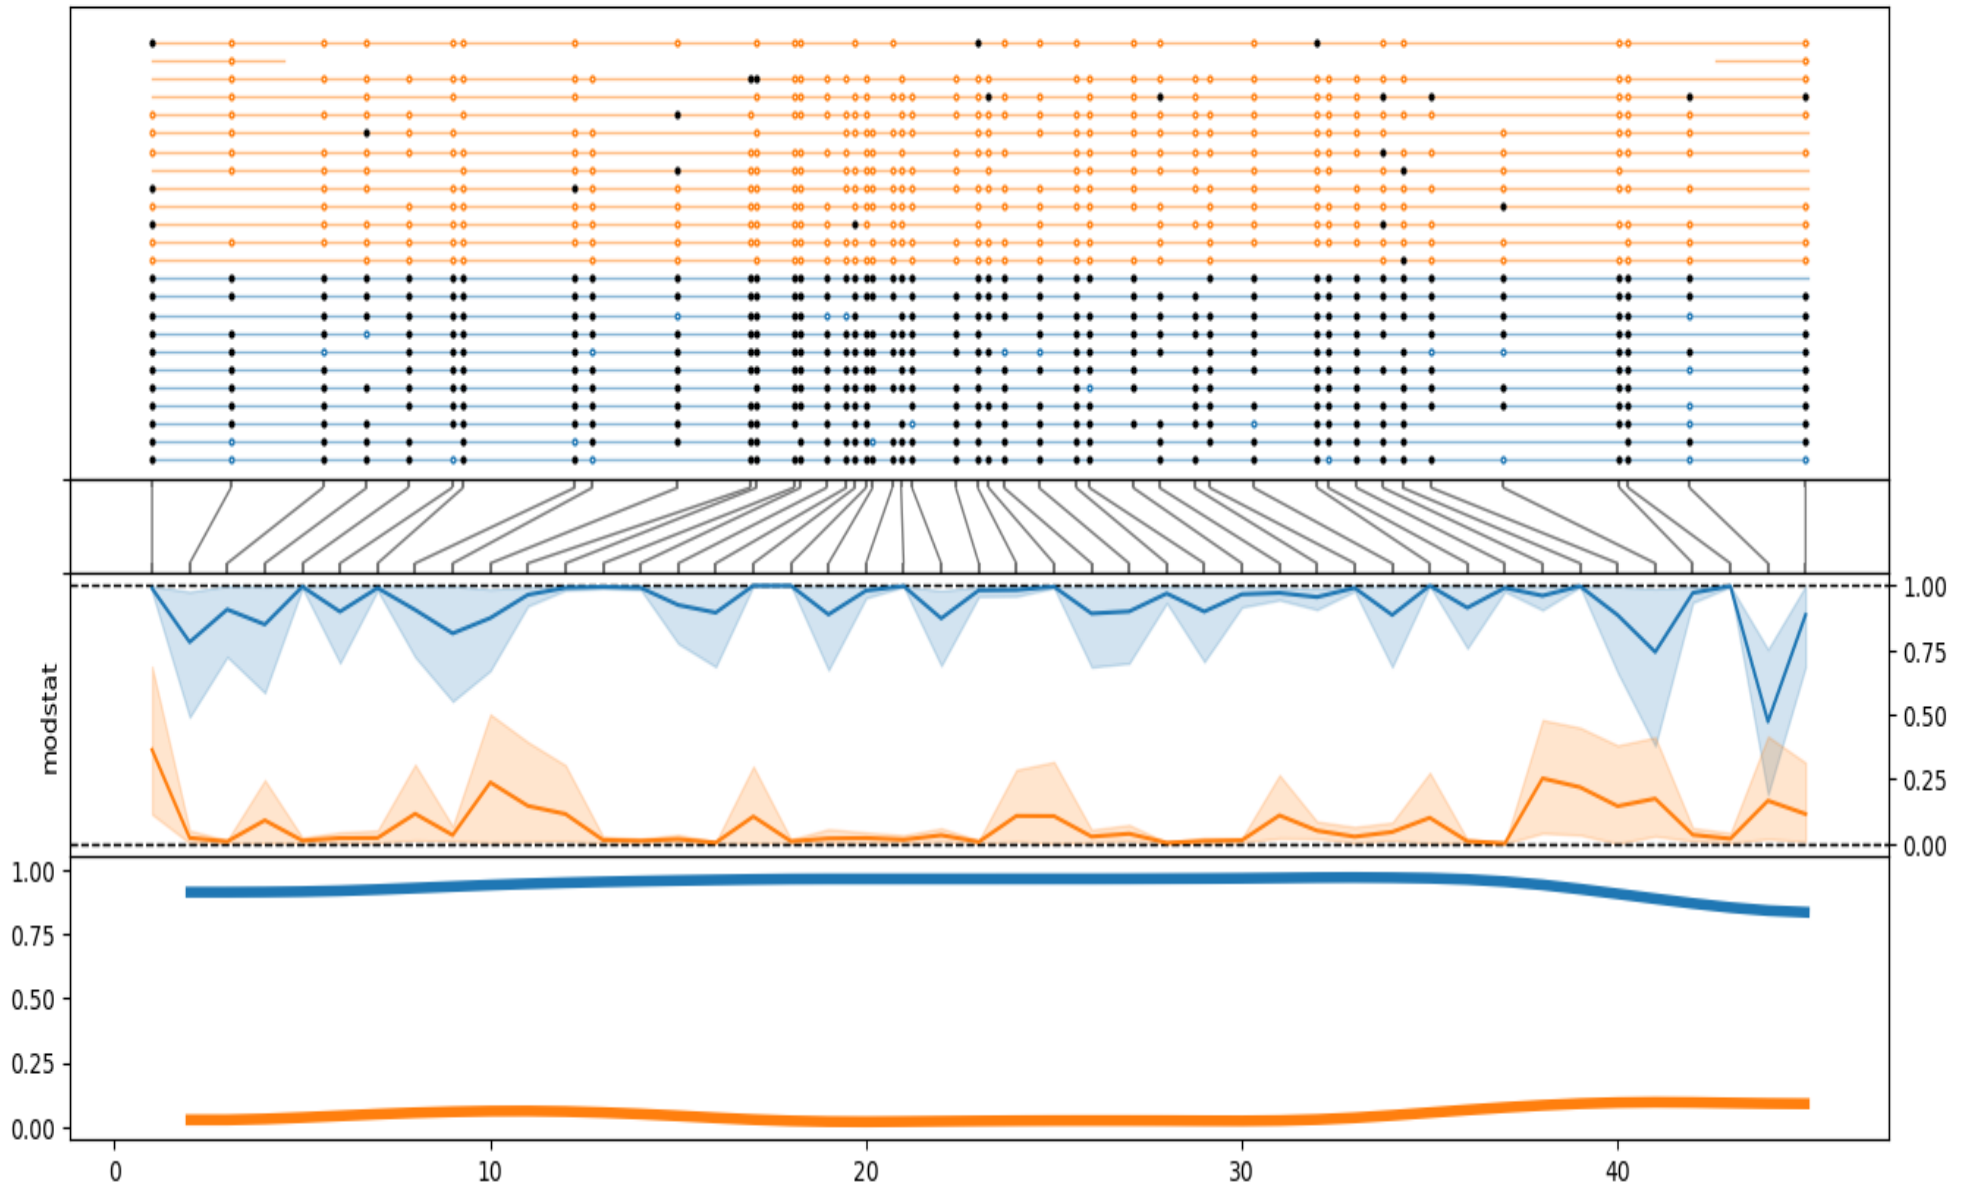

# EPI\_04\_hg38\_phased\_chr15\_23647178\_23648424

chr15:23647229 23647342 23647455 23647568 23647681 23647794 23647907 23648020 23648133 23648246 23648359 23648472

<<MAGEL2

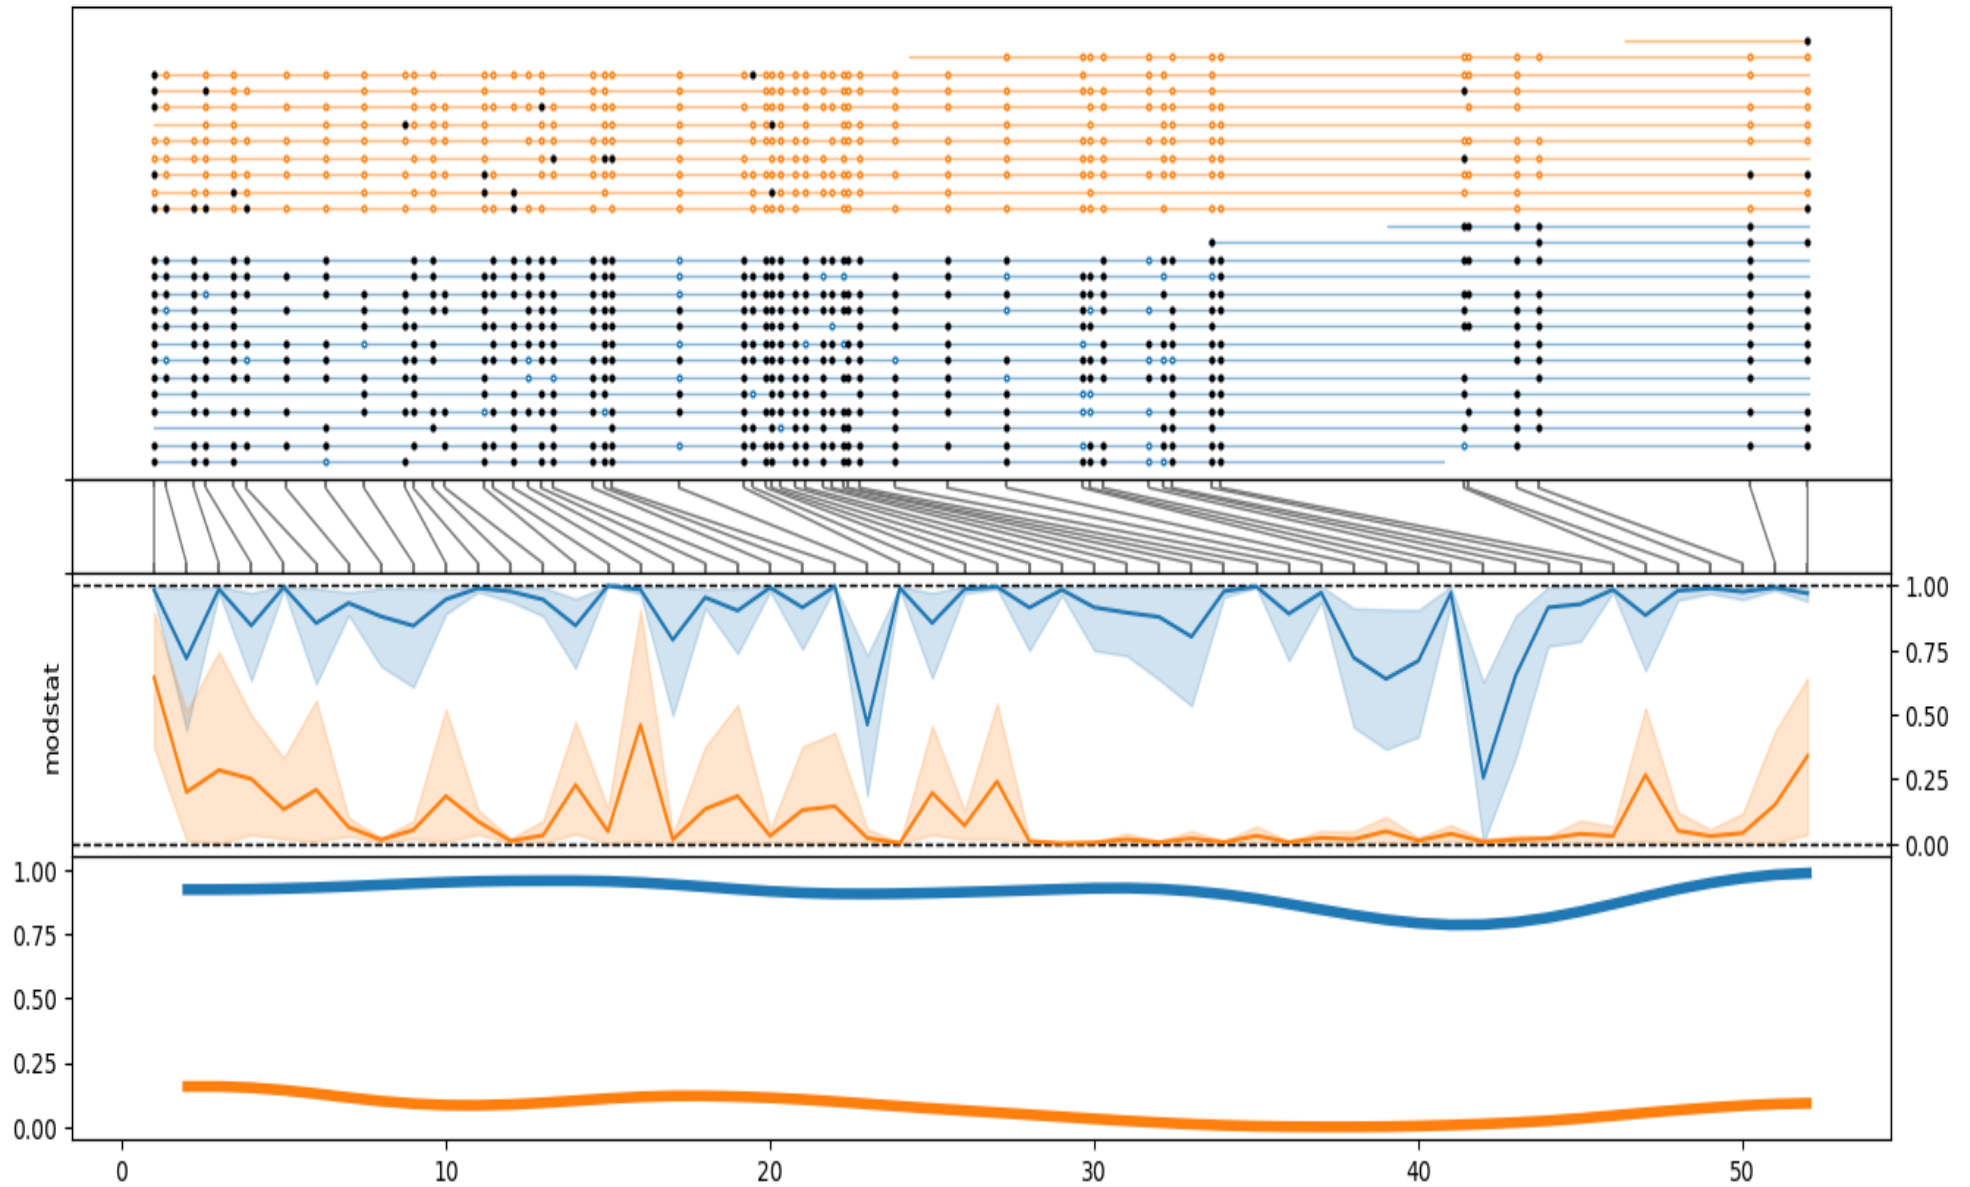

# EPI\_04\_hg38\_phased\_chromosome15\_24954564\_24956828

chr15:24954657 24954862 24955067 24955272 24955477 24955682 24955887 24956092 24956297 24956502 24956707 24956912

SNRPN>>

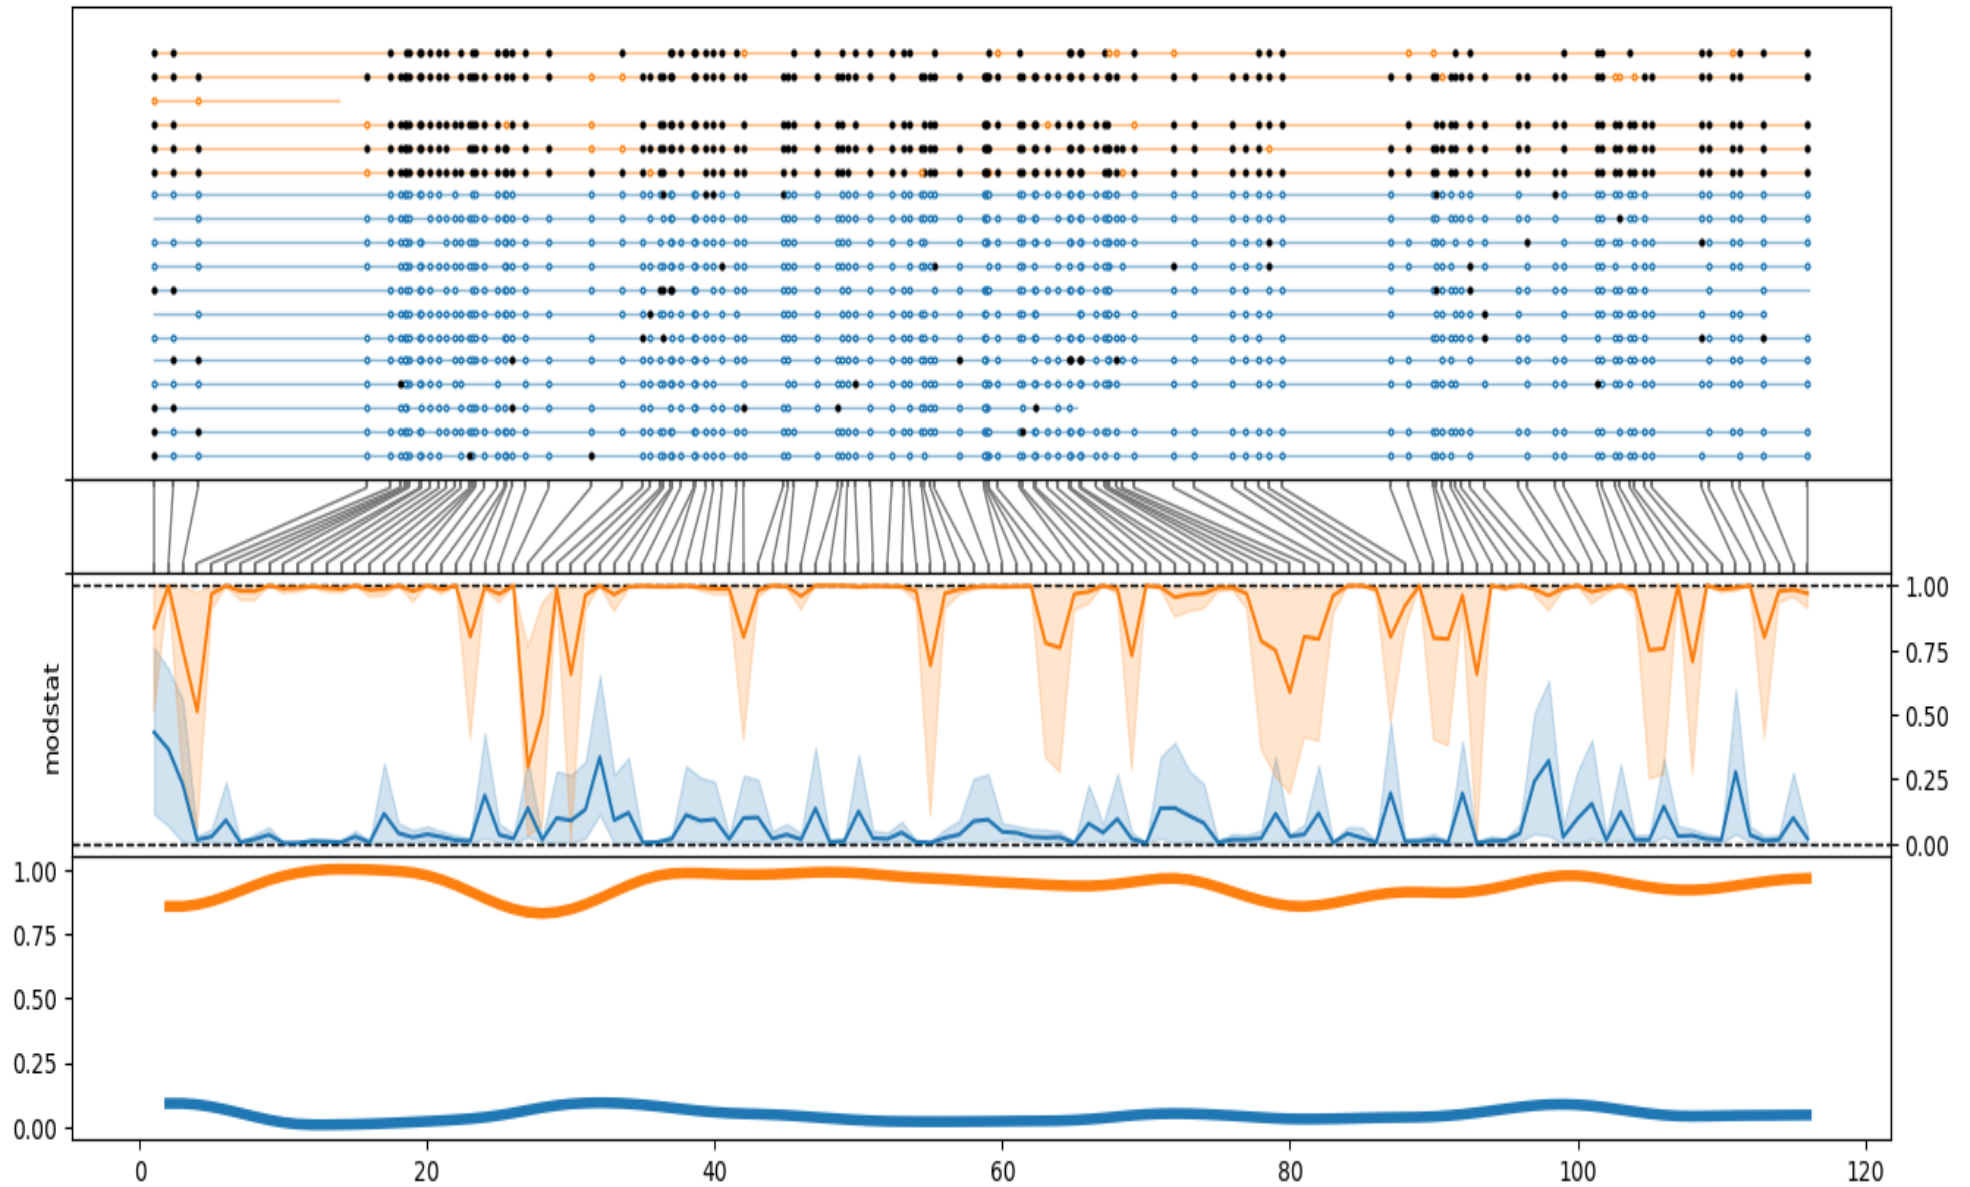

# EPI\_05\_hg38\_phased\_chr11\_1997509\_2003349

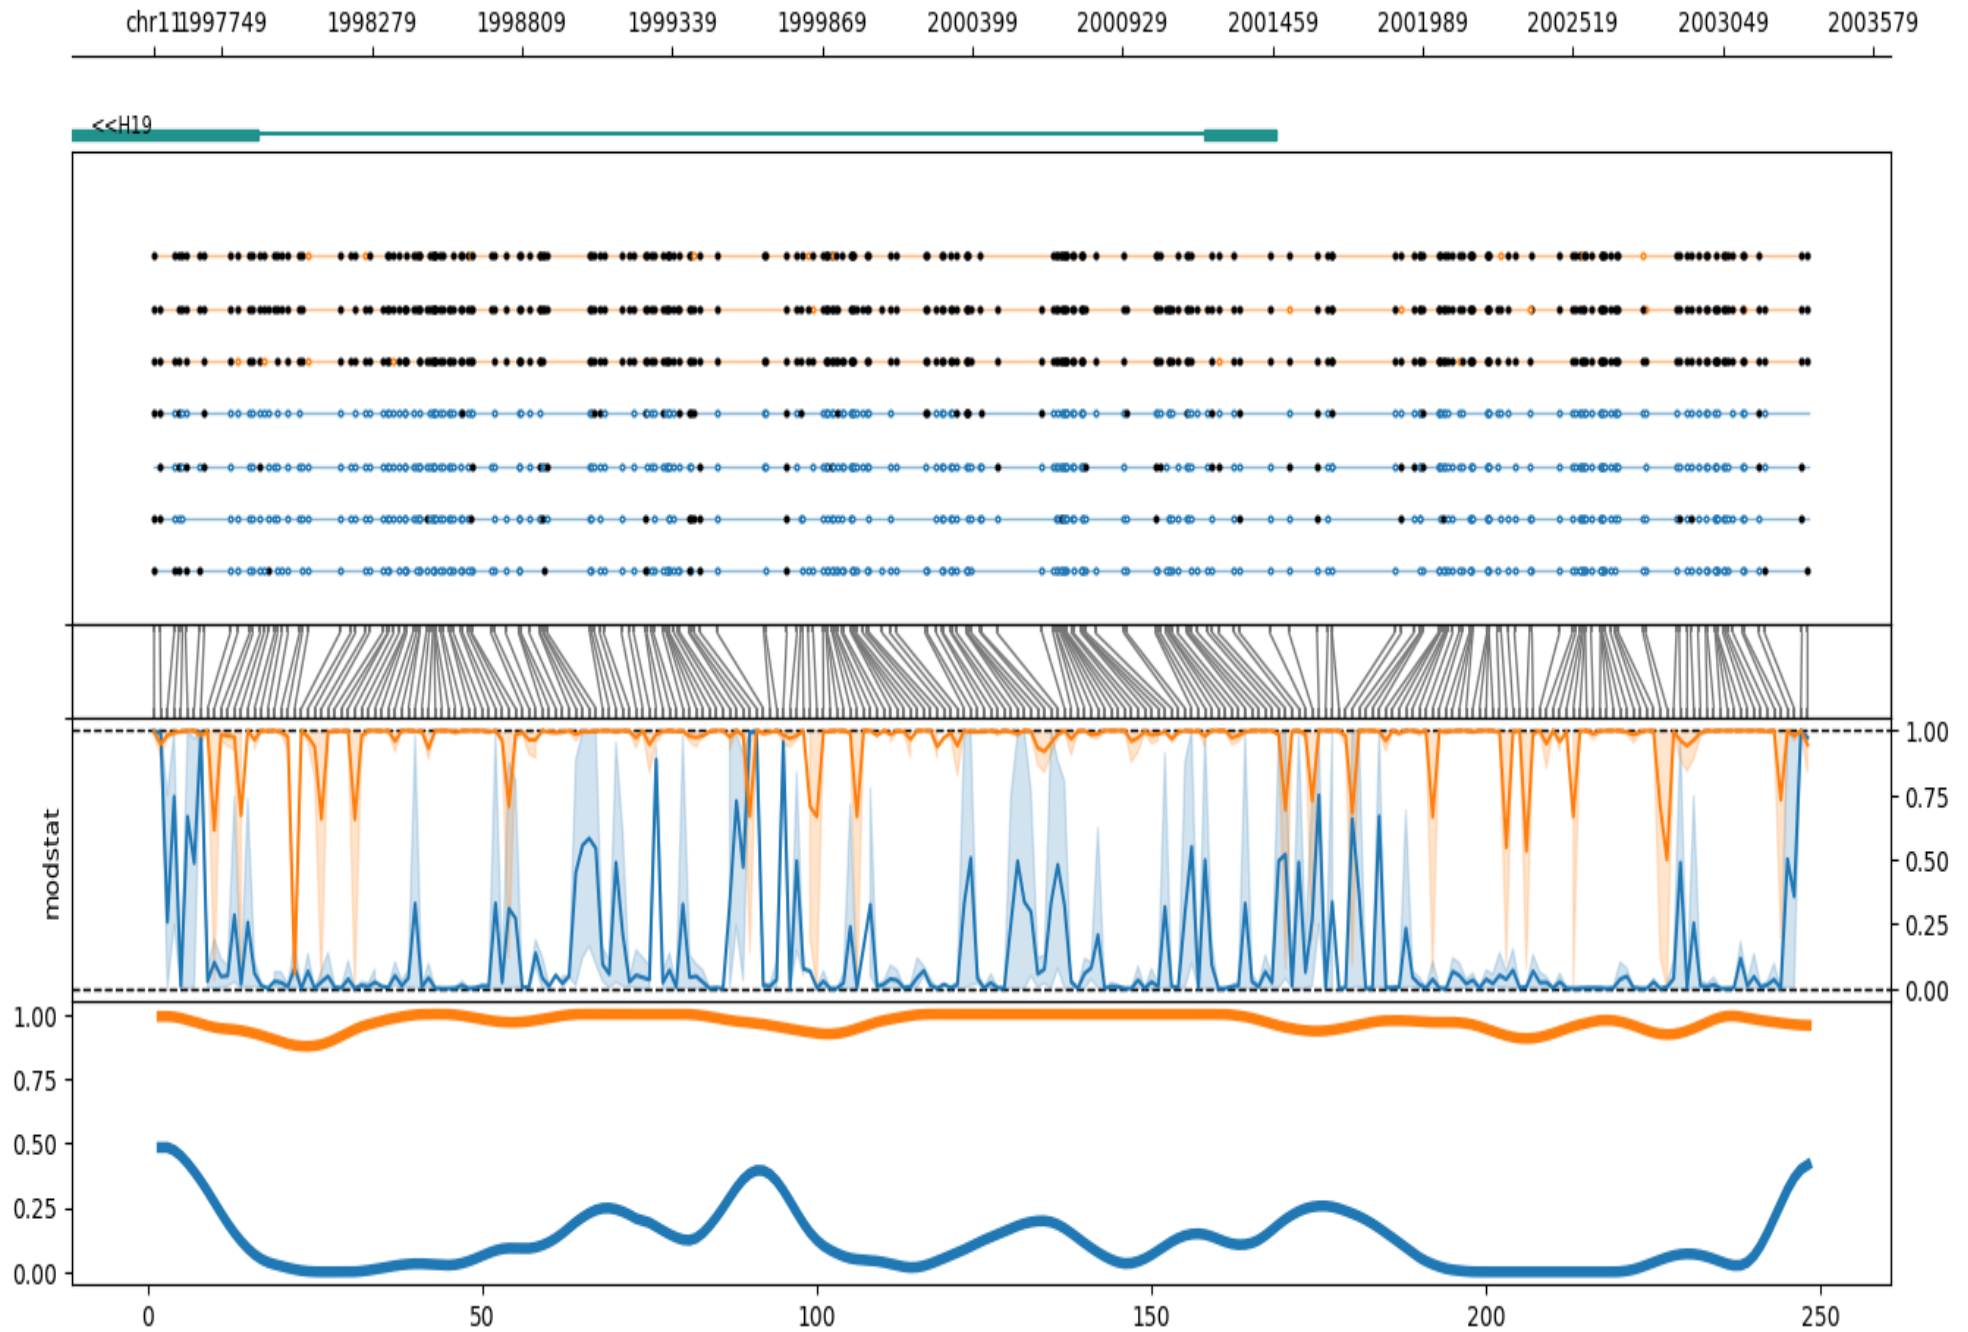



# EPI\_05\_hg38\_phased\_chr11\_2698155\_2701028

chr11 2698274 2698535 2698796 2699057 2699318 2699579 2699840 2700101 2700362 2700623 2700884 2701145

KCNQ1>>

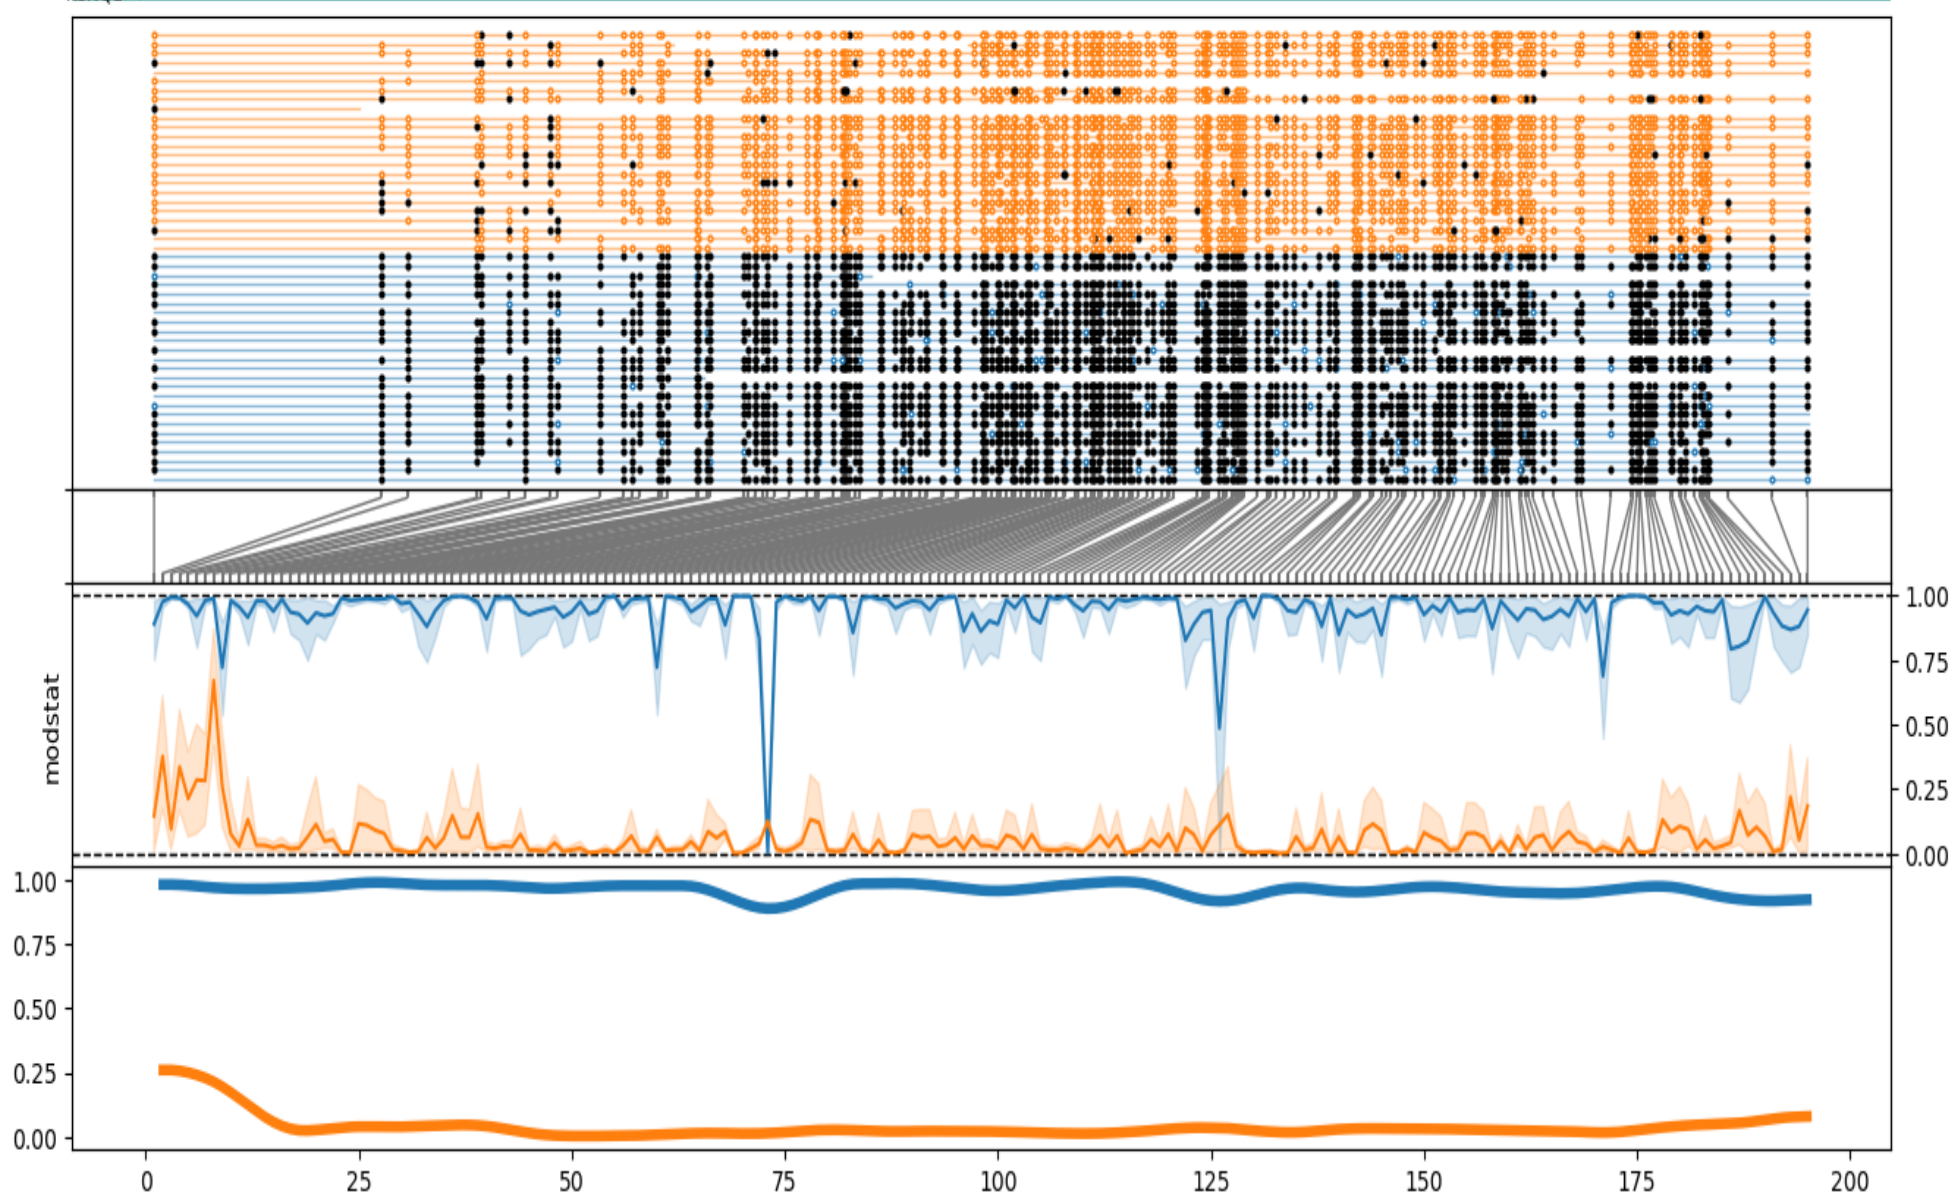

# EPI\_05\_hg38\_phased\_chr14\_100824185\_100827640

chr14 100824328 100824642 100824956 100825270 100825584 100825898 100826212 100826526 100826840 100827154 100827468 100827782

MEG3>>

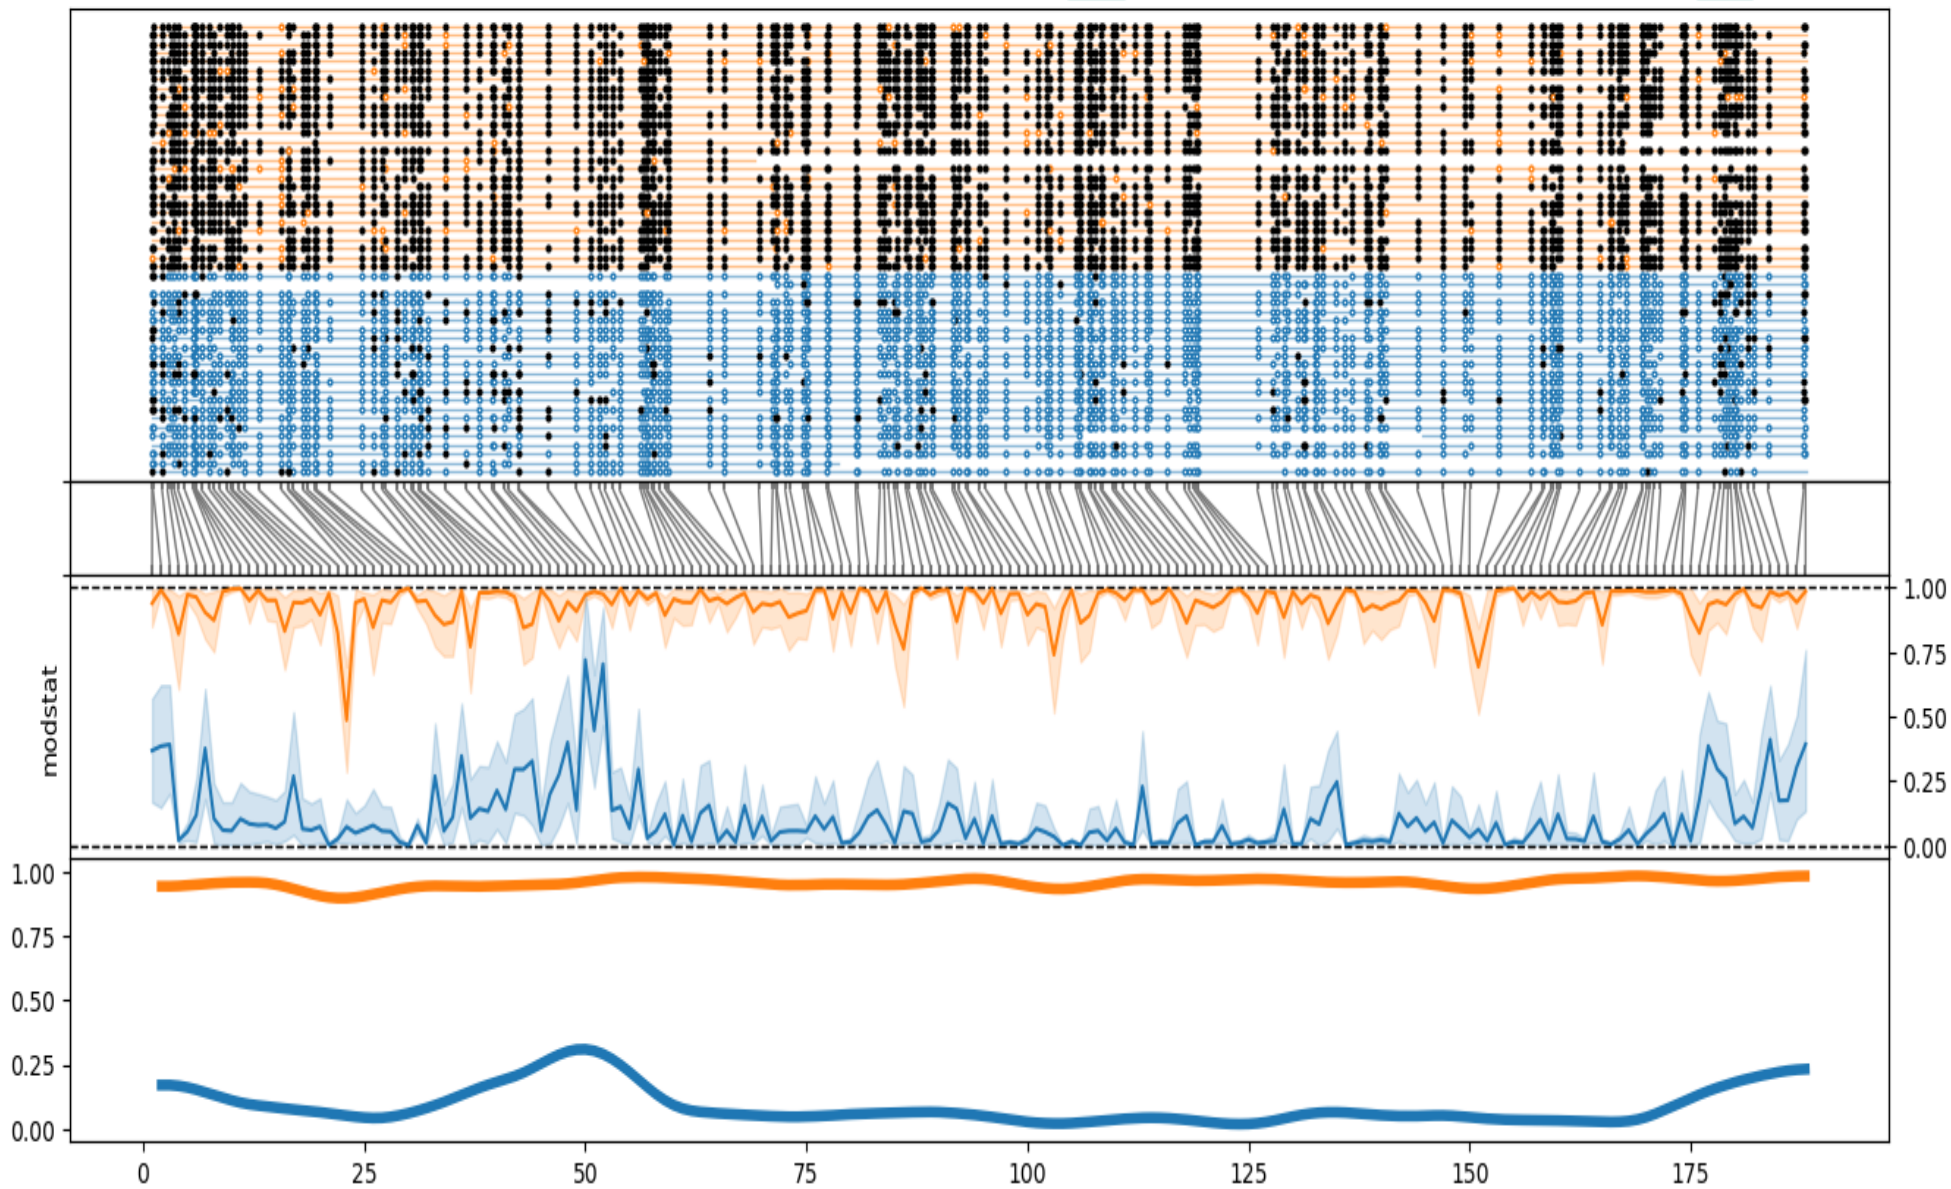

# EPI\_05\_hg38\_phased\_chr14\_100904325\_100905081

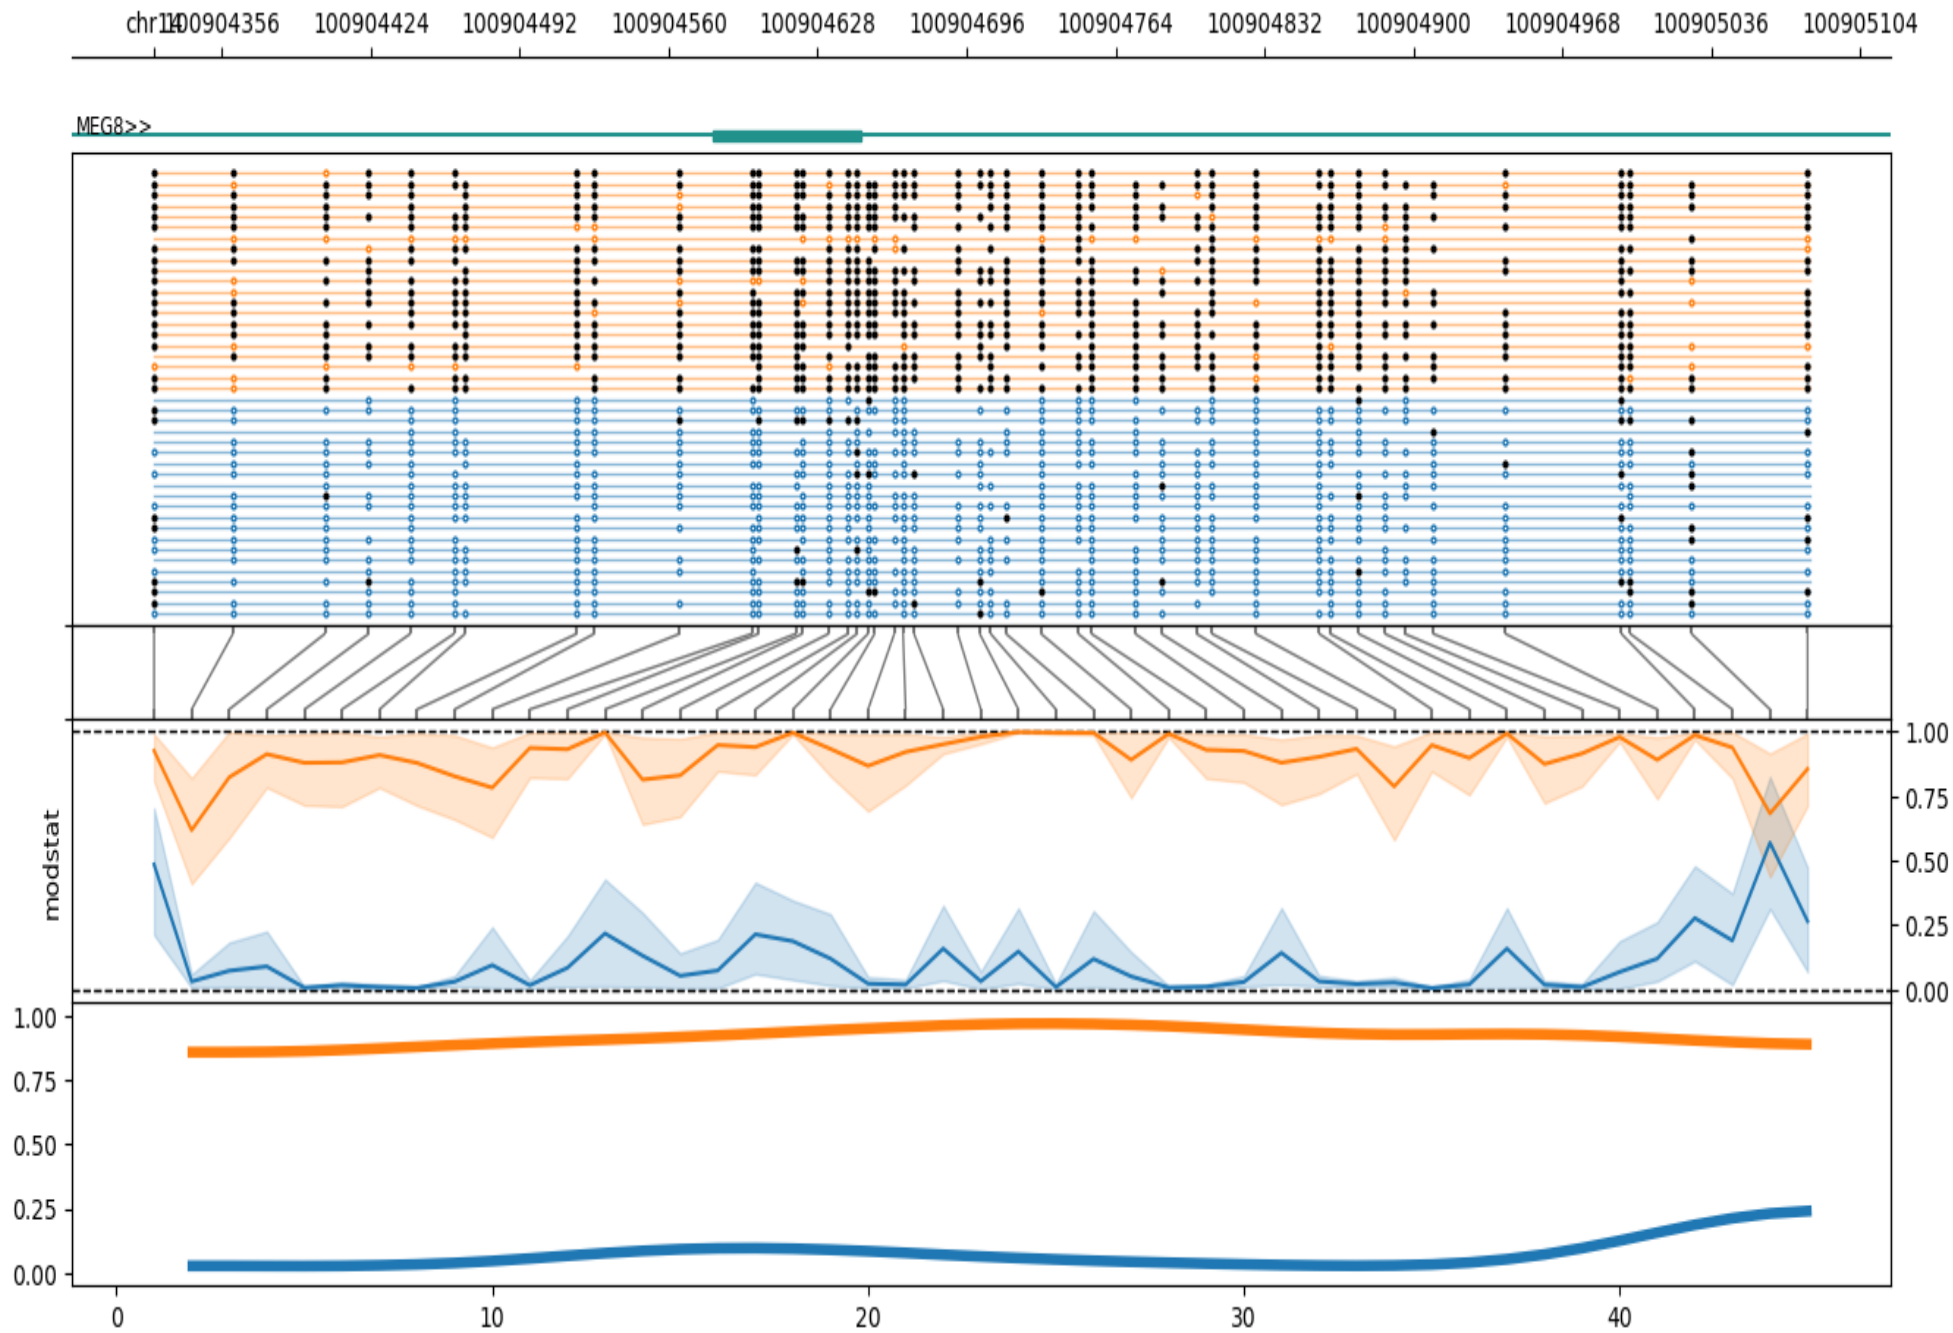



# EPI\_05\_hg38\_phased\_chr15\_23647178\_23648424

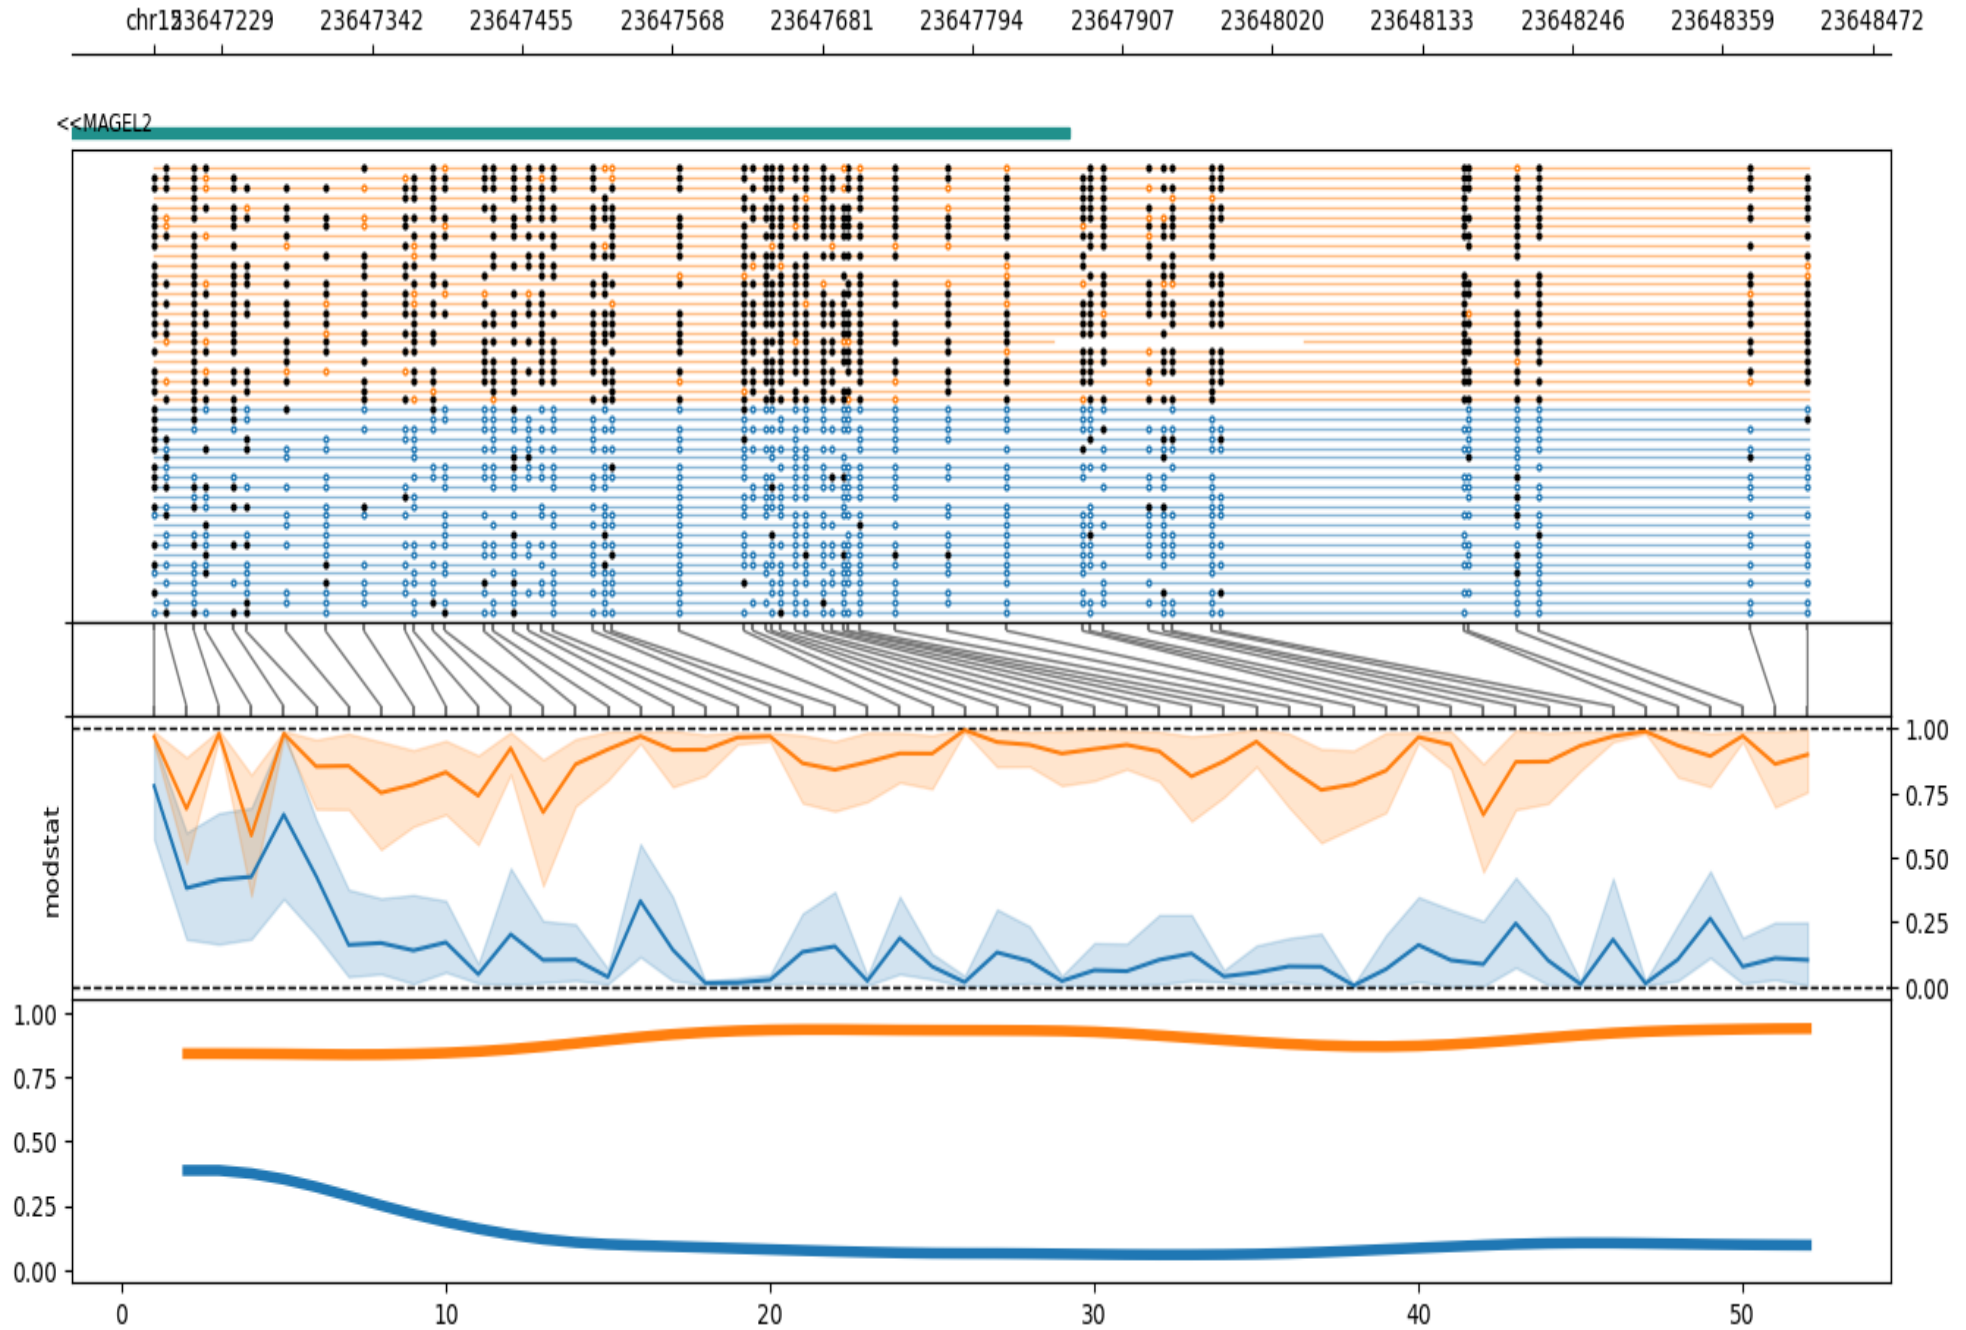



# EPI\_05\_hg38\_phased\_chr15\_24954564\_24956828

chr15:4954657 24954862 24955067 24955272 24955477 24955682 24955887 24956092 24956297 24956502 24956707 24956912

SNRPN>>

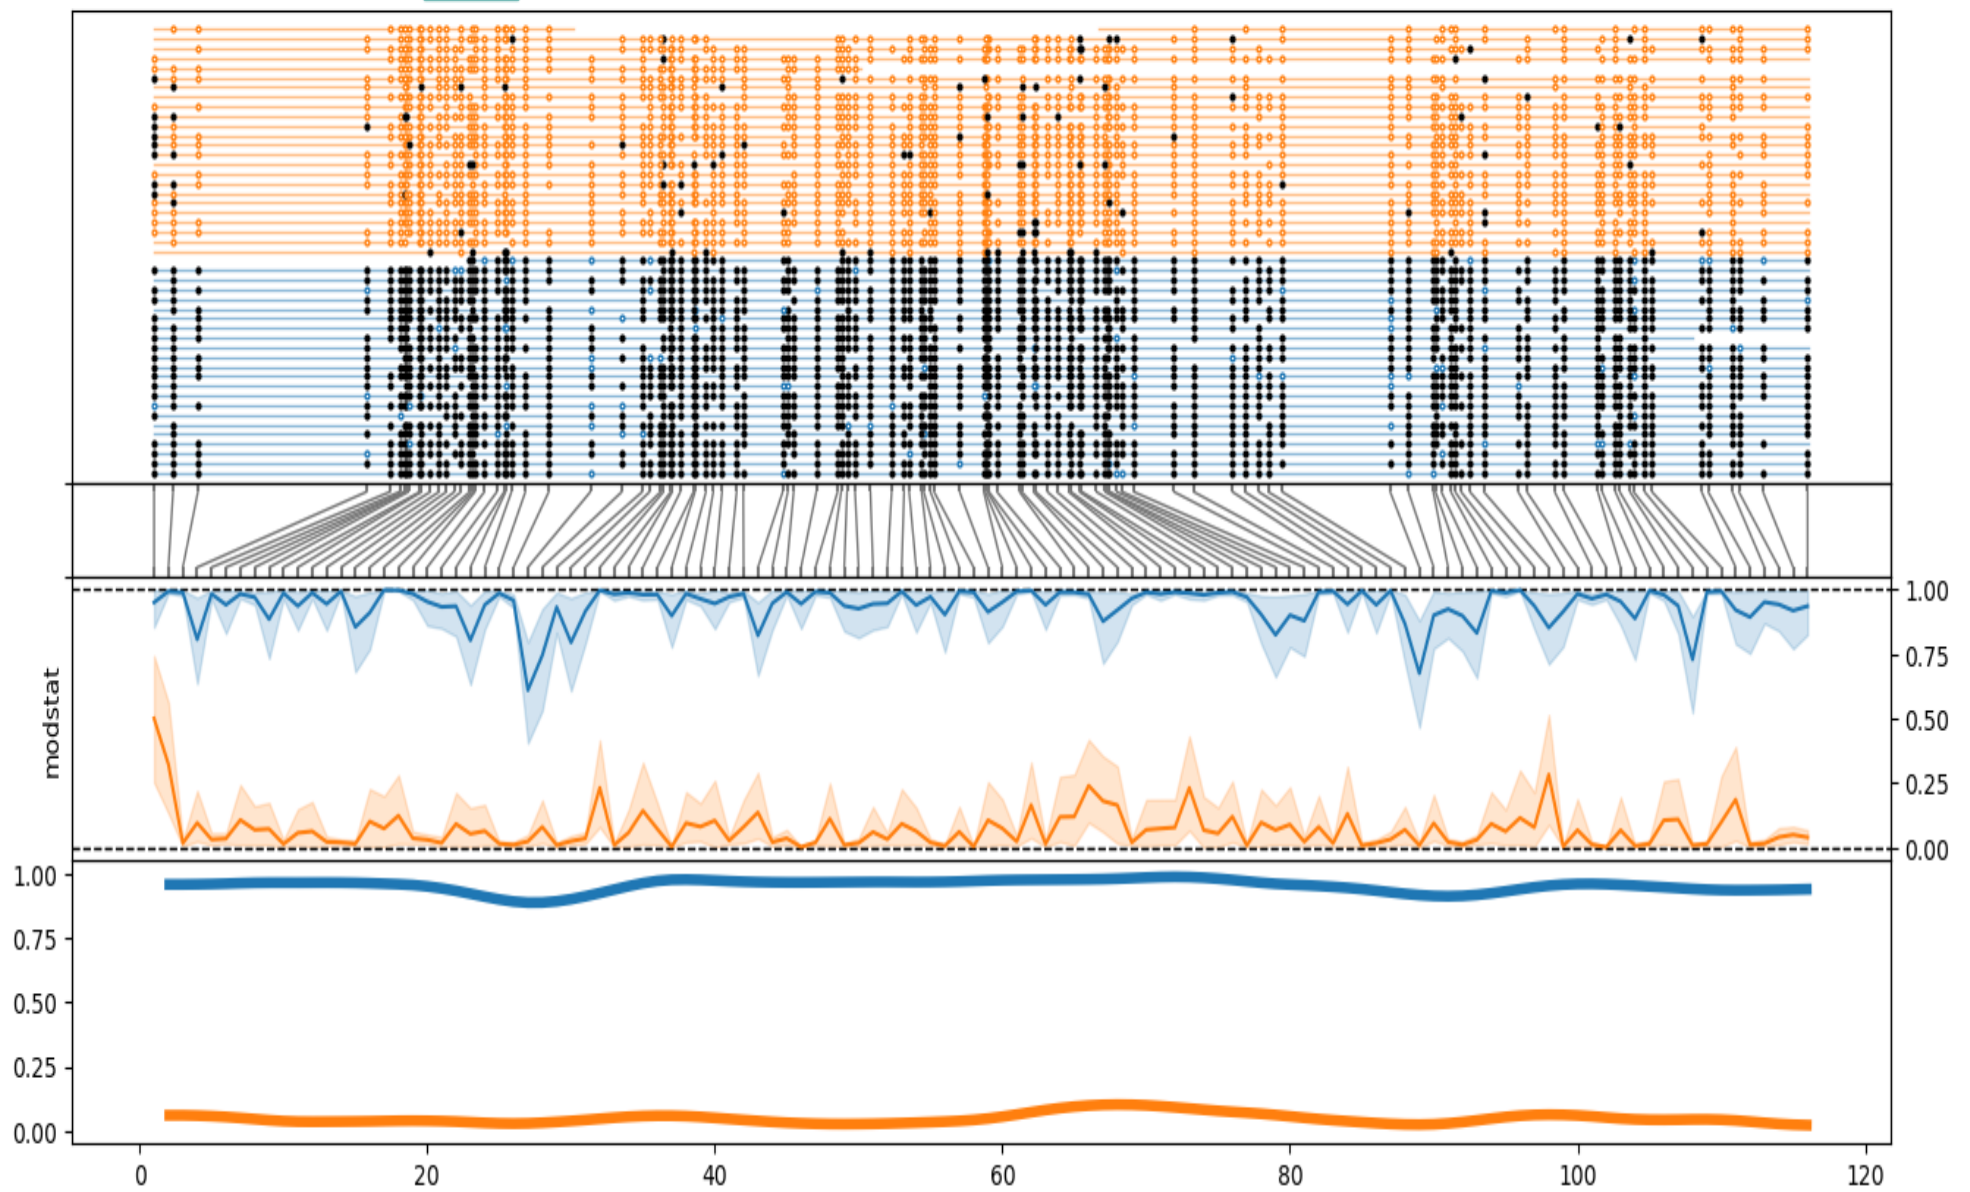

# EPI\_06\_hg38\_phased\_chr11\_1997509\_2003349

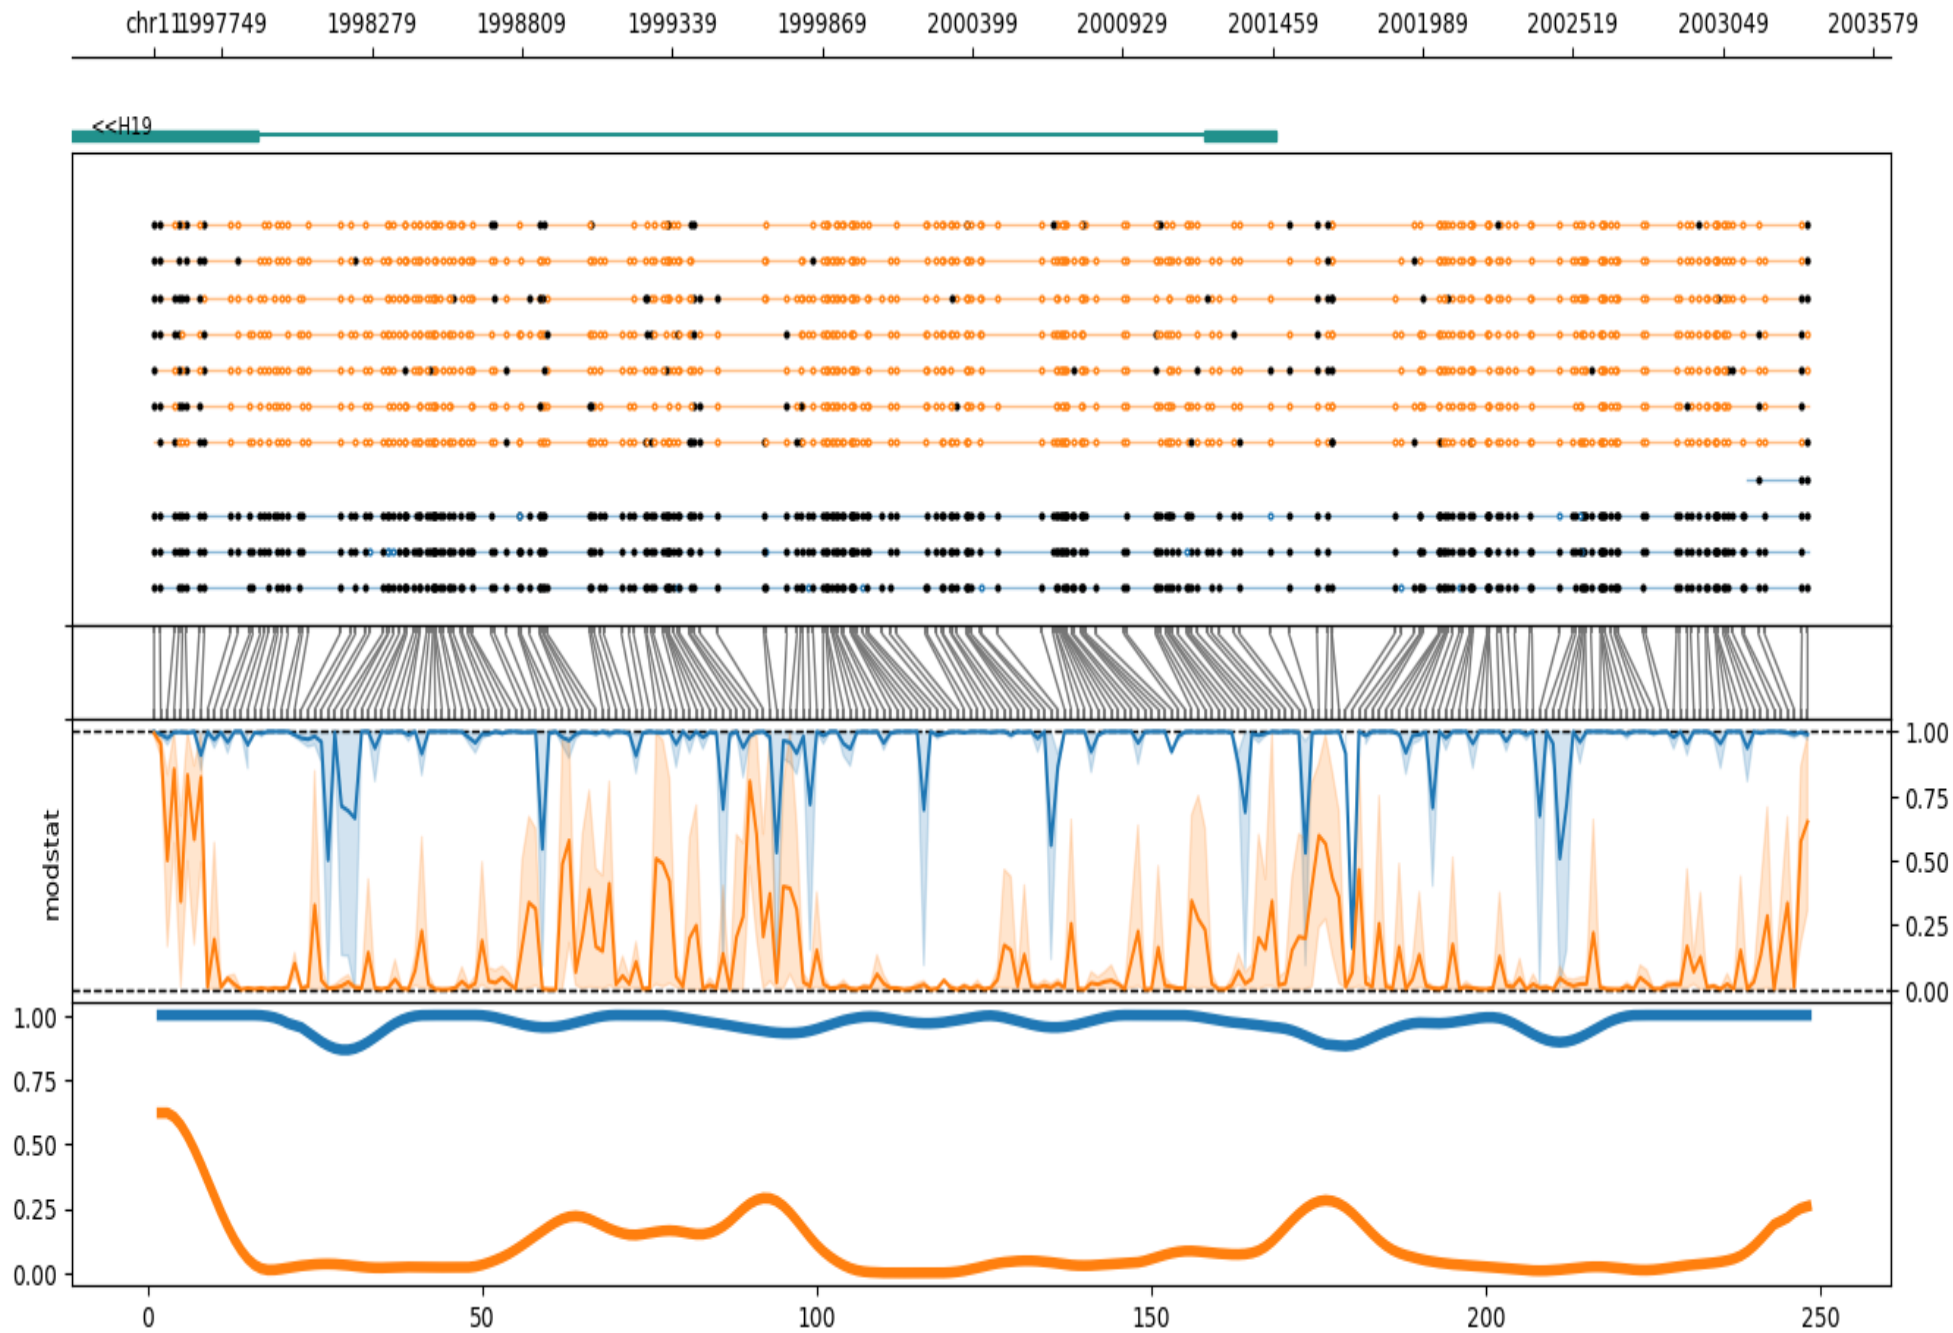

# EPI\_06\_hg38\_phased\_chr11\_2698155\_2701028

chr11 2698274 2698535 2698796 2699057 2699318 2699579 2699840 2700101 2700362 2700623 2700884 2701145

KCNQ1>>

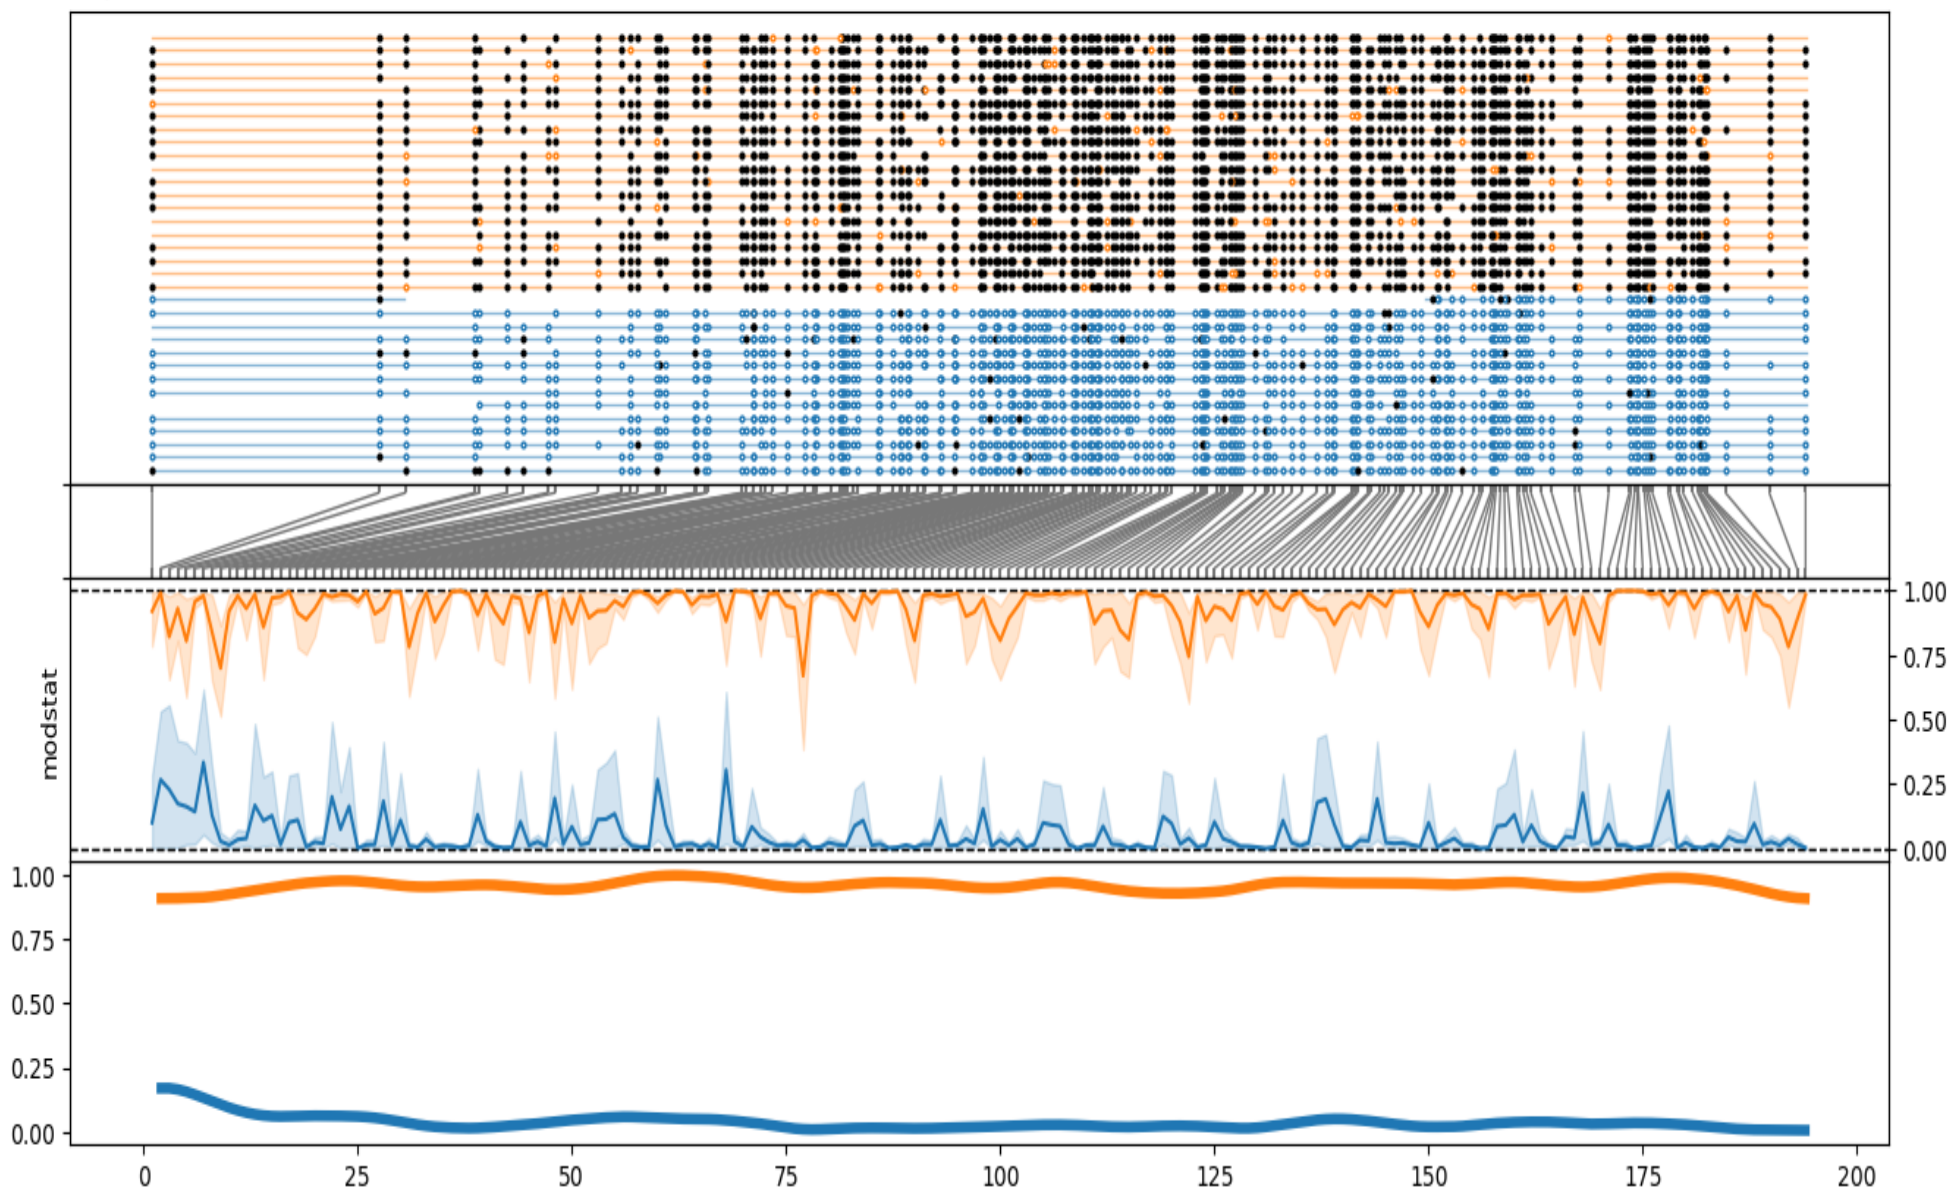



# EPI\_06\_hg38\_phased\_chr14\_100824185\_100827640

chr14 100824328 100824642 100824956 100825270 100825584 100825898 100826212 100826526 100826840 100827154 100827468 100827782

MEG3>>

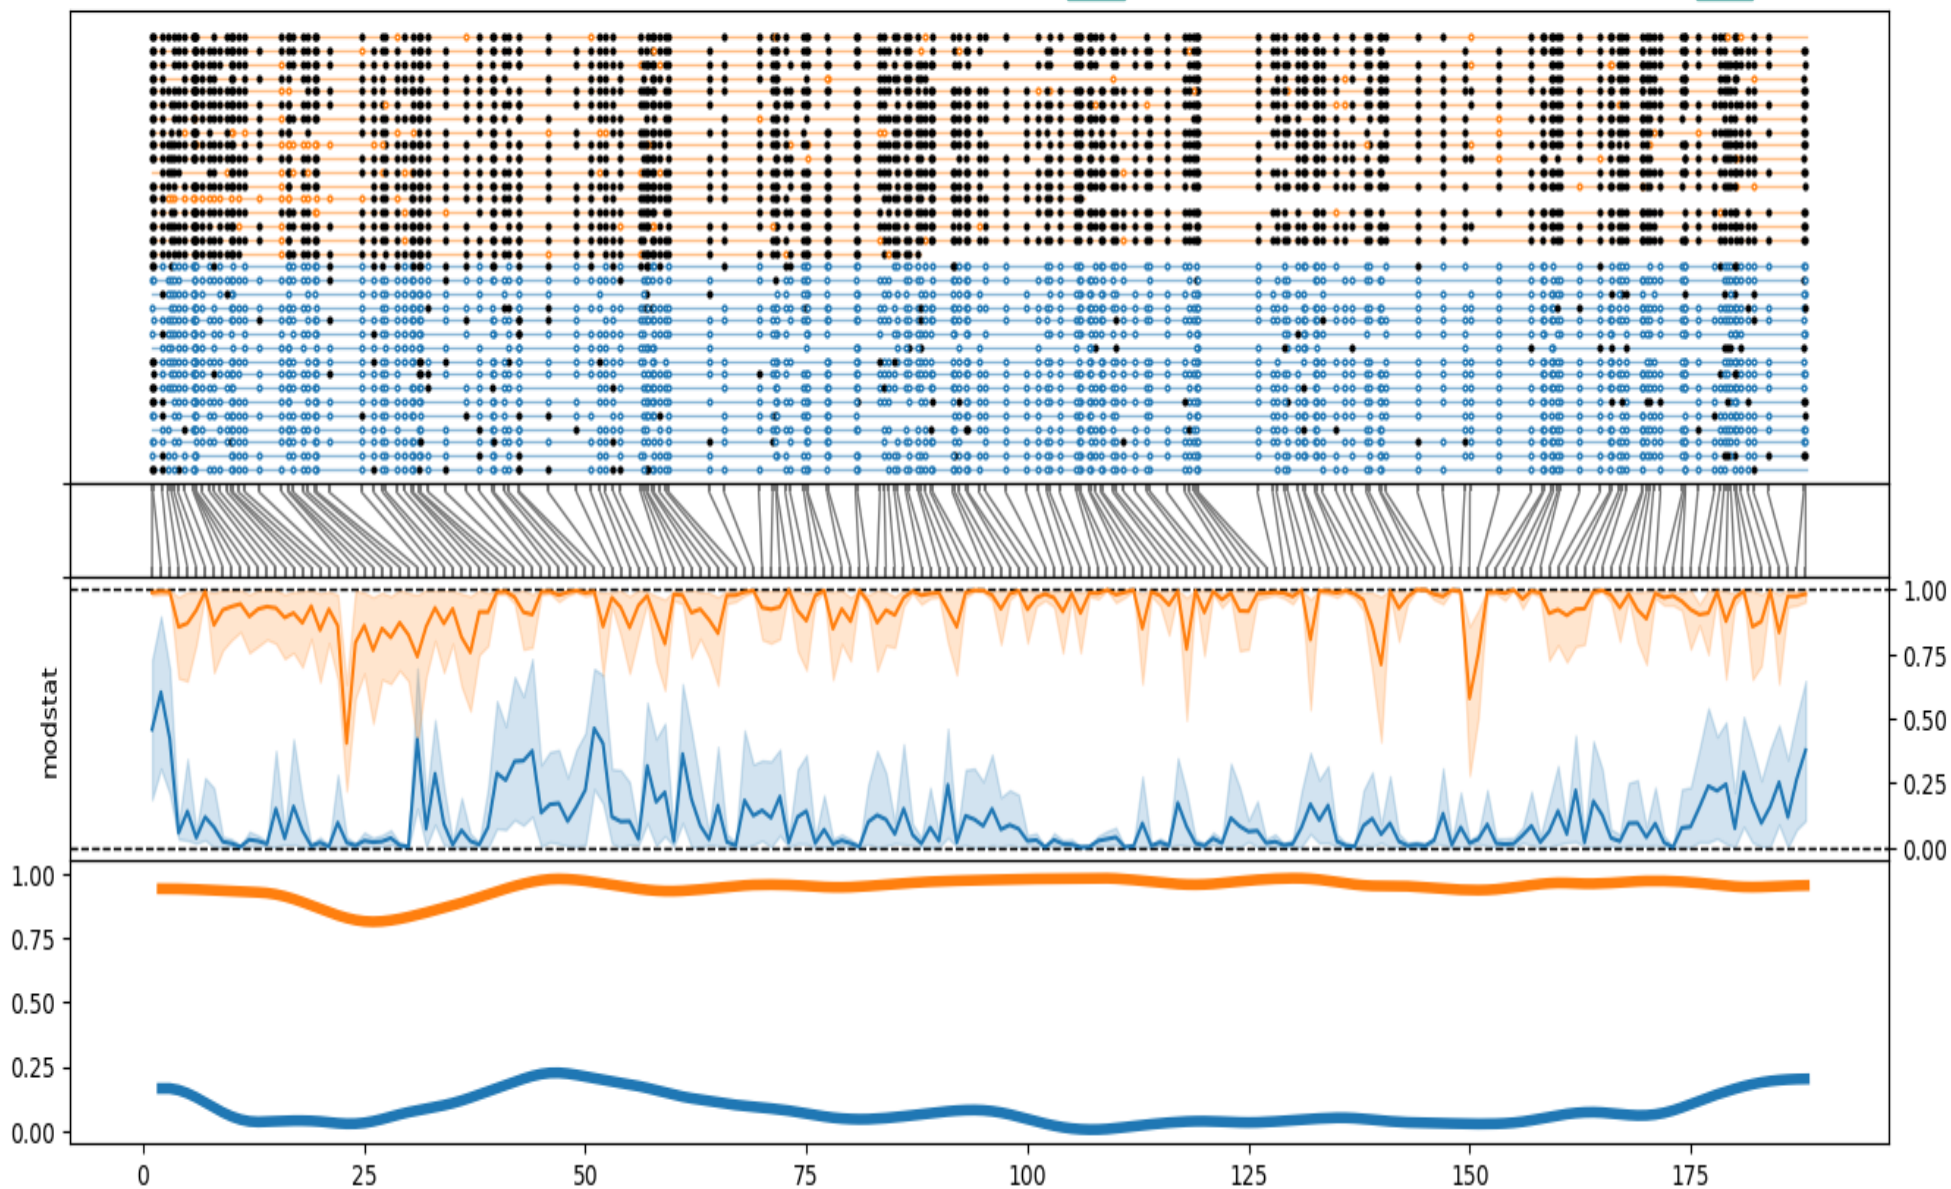



# EPI\_06\_hg38\_phased\_chr14\_100904325\_100905081

chr14 100904356 100904424 100904492 100904560 100904628 100904696 100904764 100904832 100904900 100904968 100905036 100905104

MEG8>>

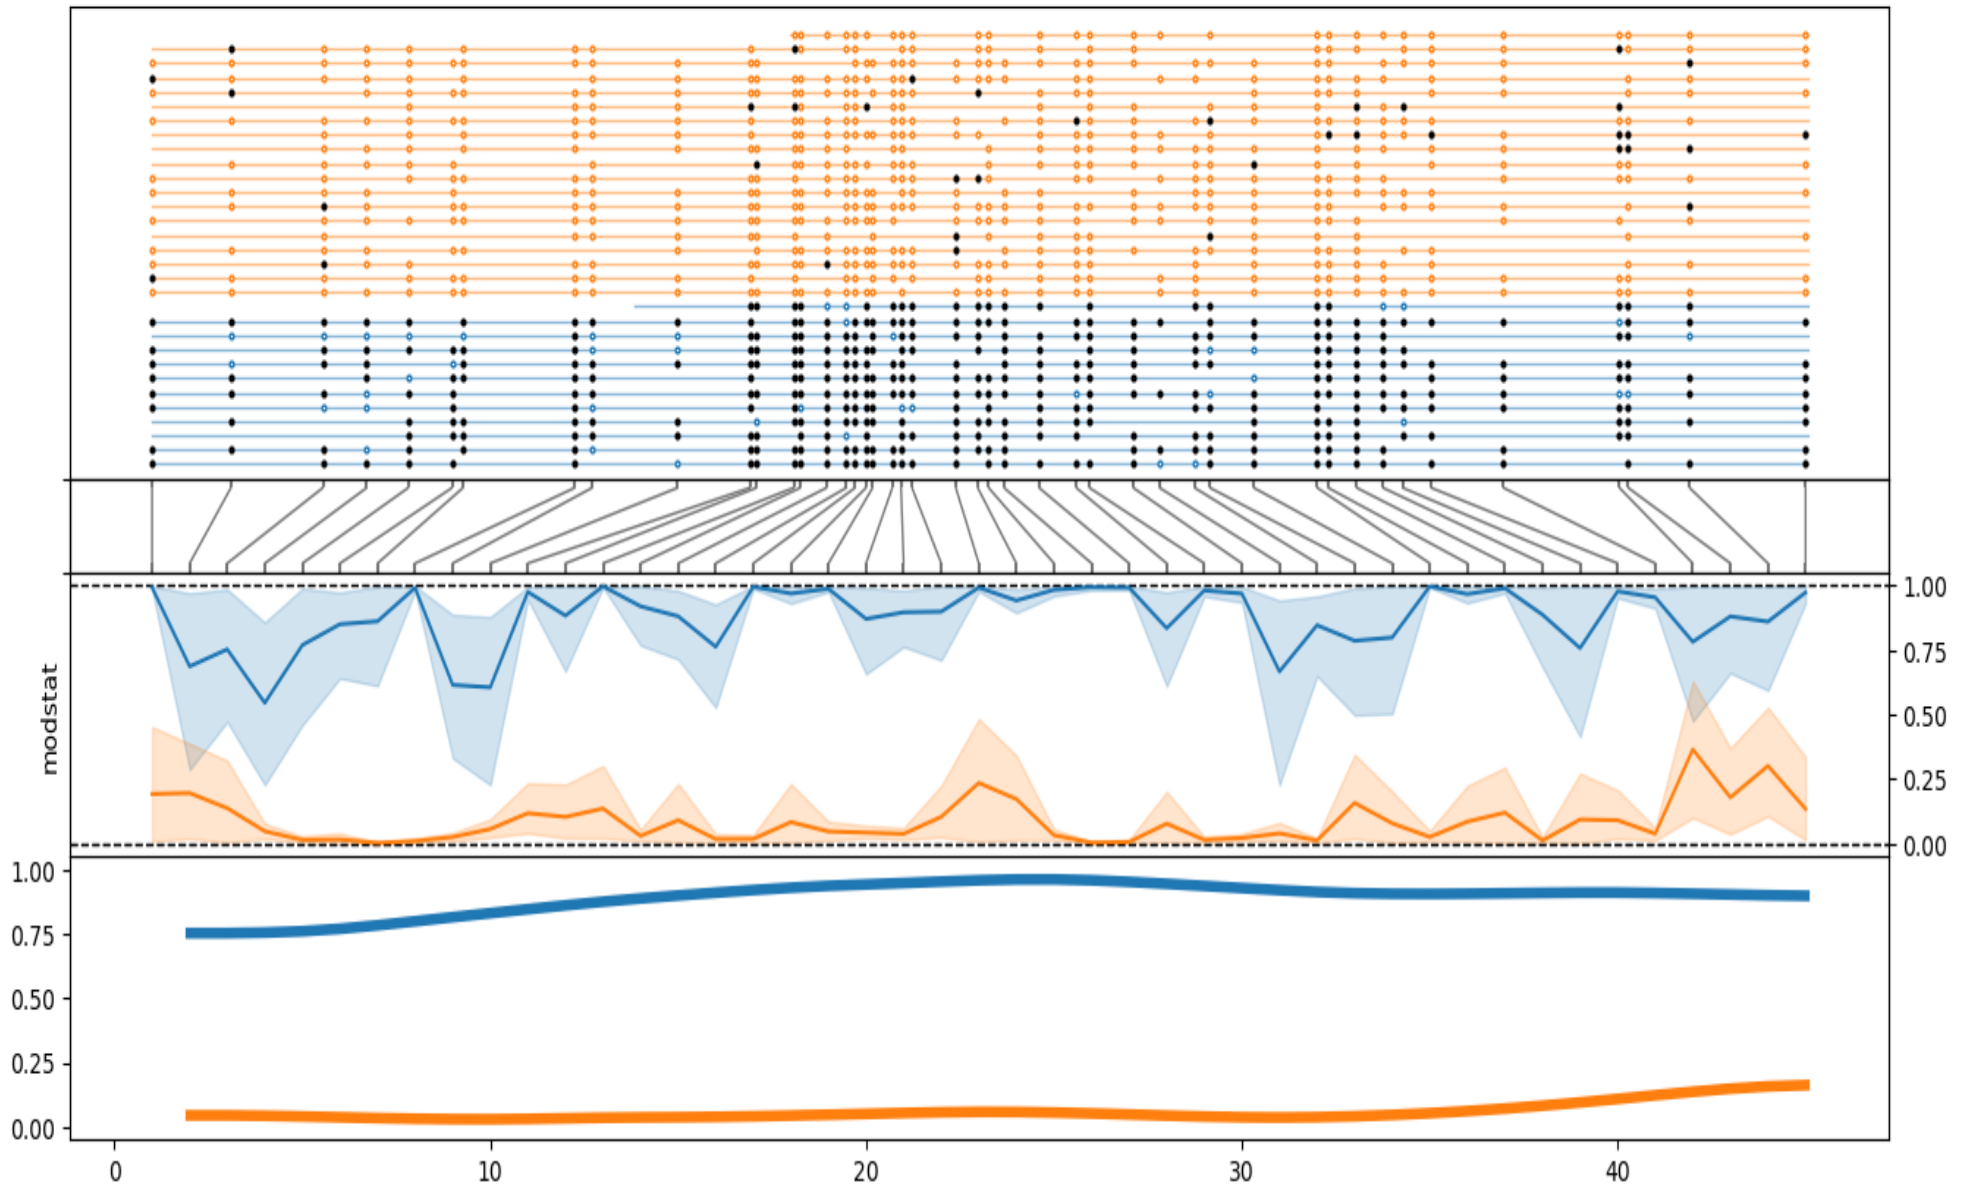

# EPI\_06\_hg38\_phased\_chrom15\_23647178\_23648424

chr15:23647229 23647342 23647455 23647568 23647681 23647794 23647907 23648020 23648133 23648246 23648359 23648472

<<MAGEL2

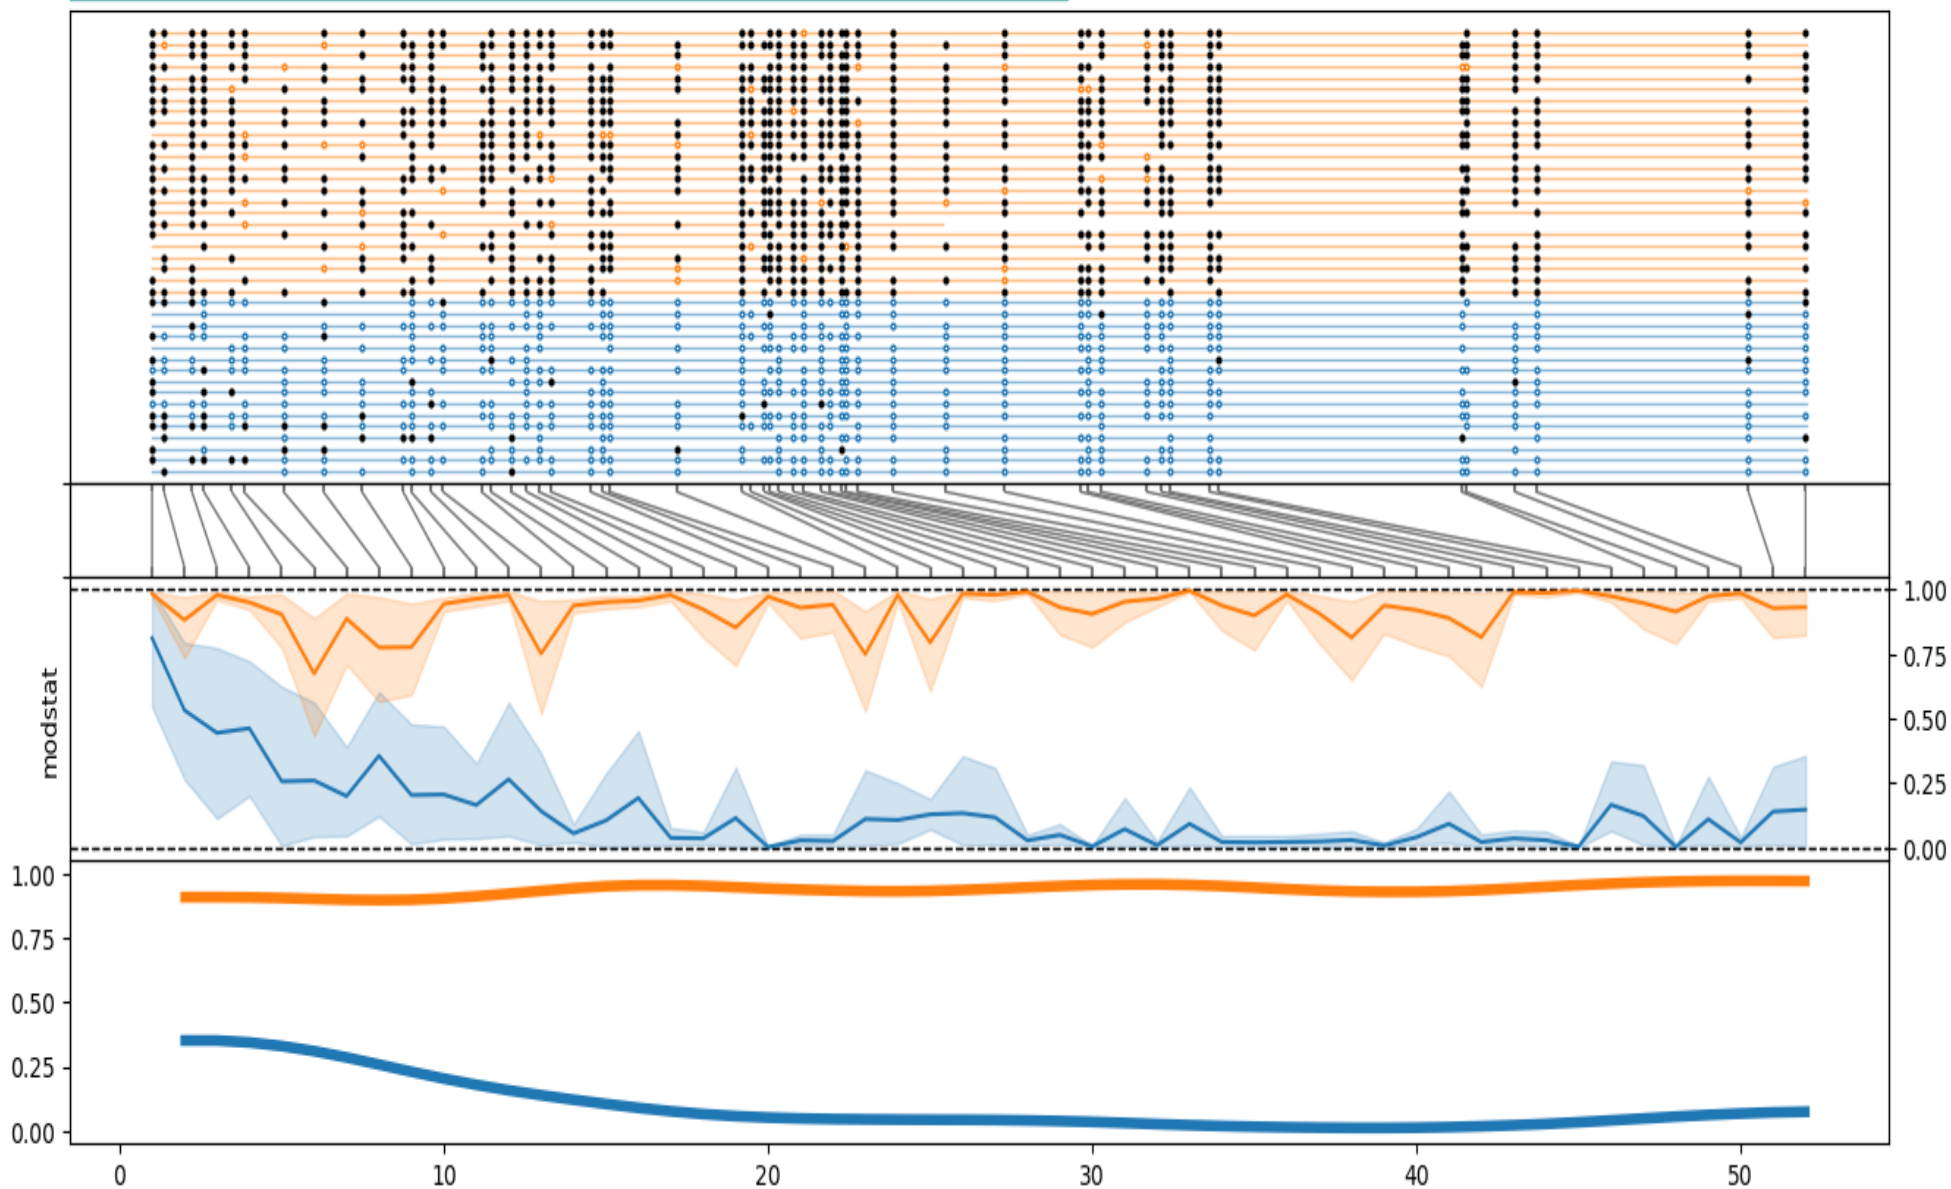

# EPI\_06\_hg38\_phased\_chromosome15\_24954564\_24956828

chr15:24954657 24954862 24955067 24955272 24955477 24955682 24955887 24956092 24956297 24956502 24956707 24956912

SNRPN>>

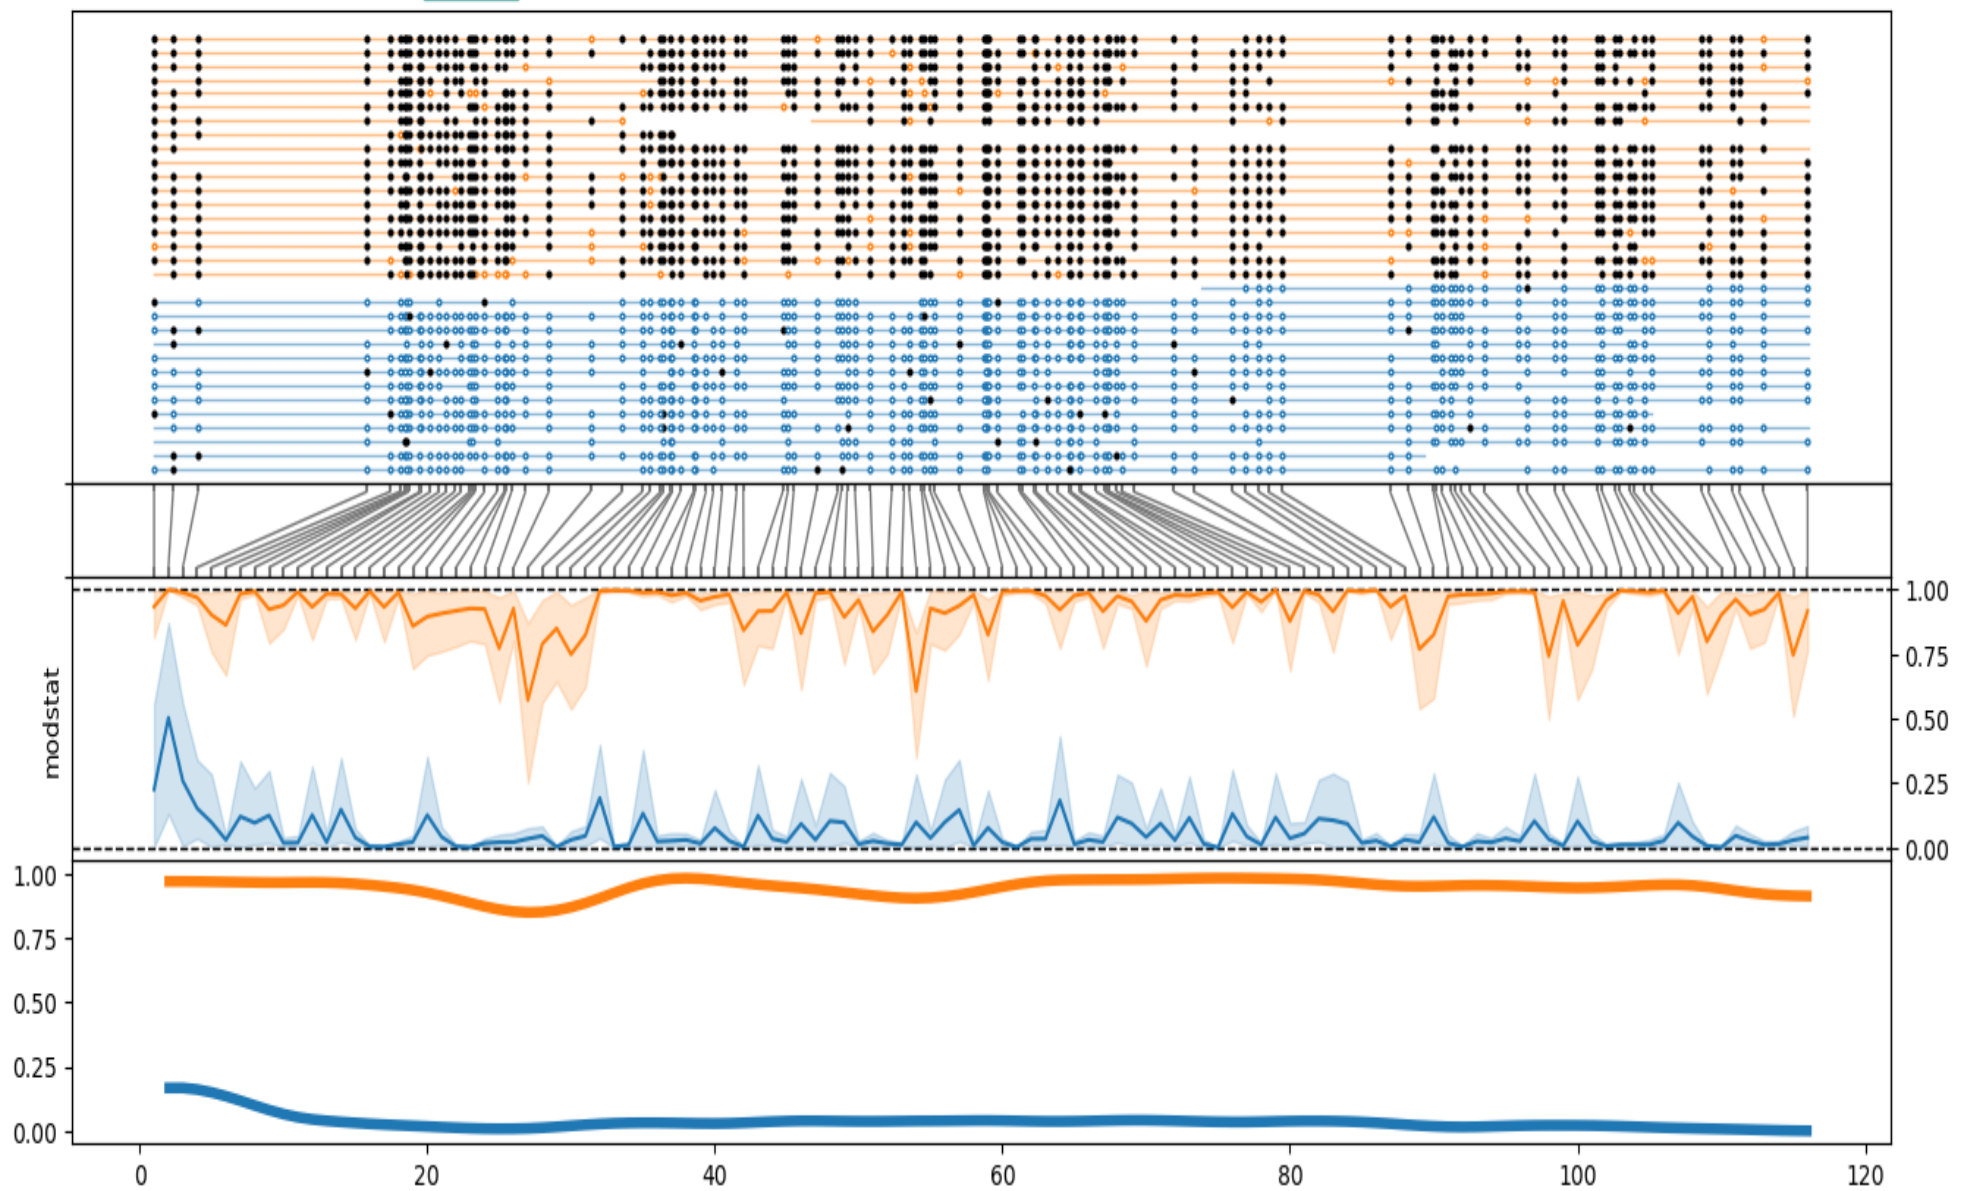

# EPI\_07\_hg38\_phased\_chr11\_1997509\_2003349

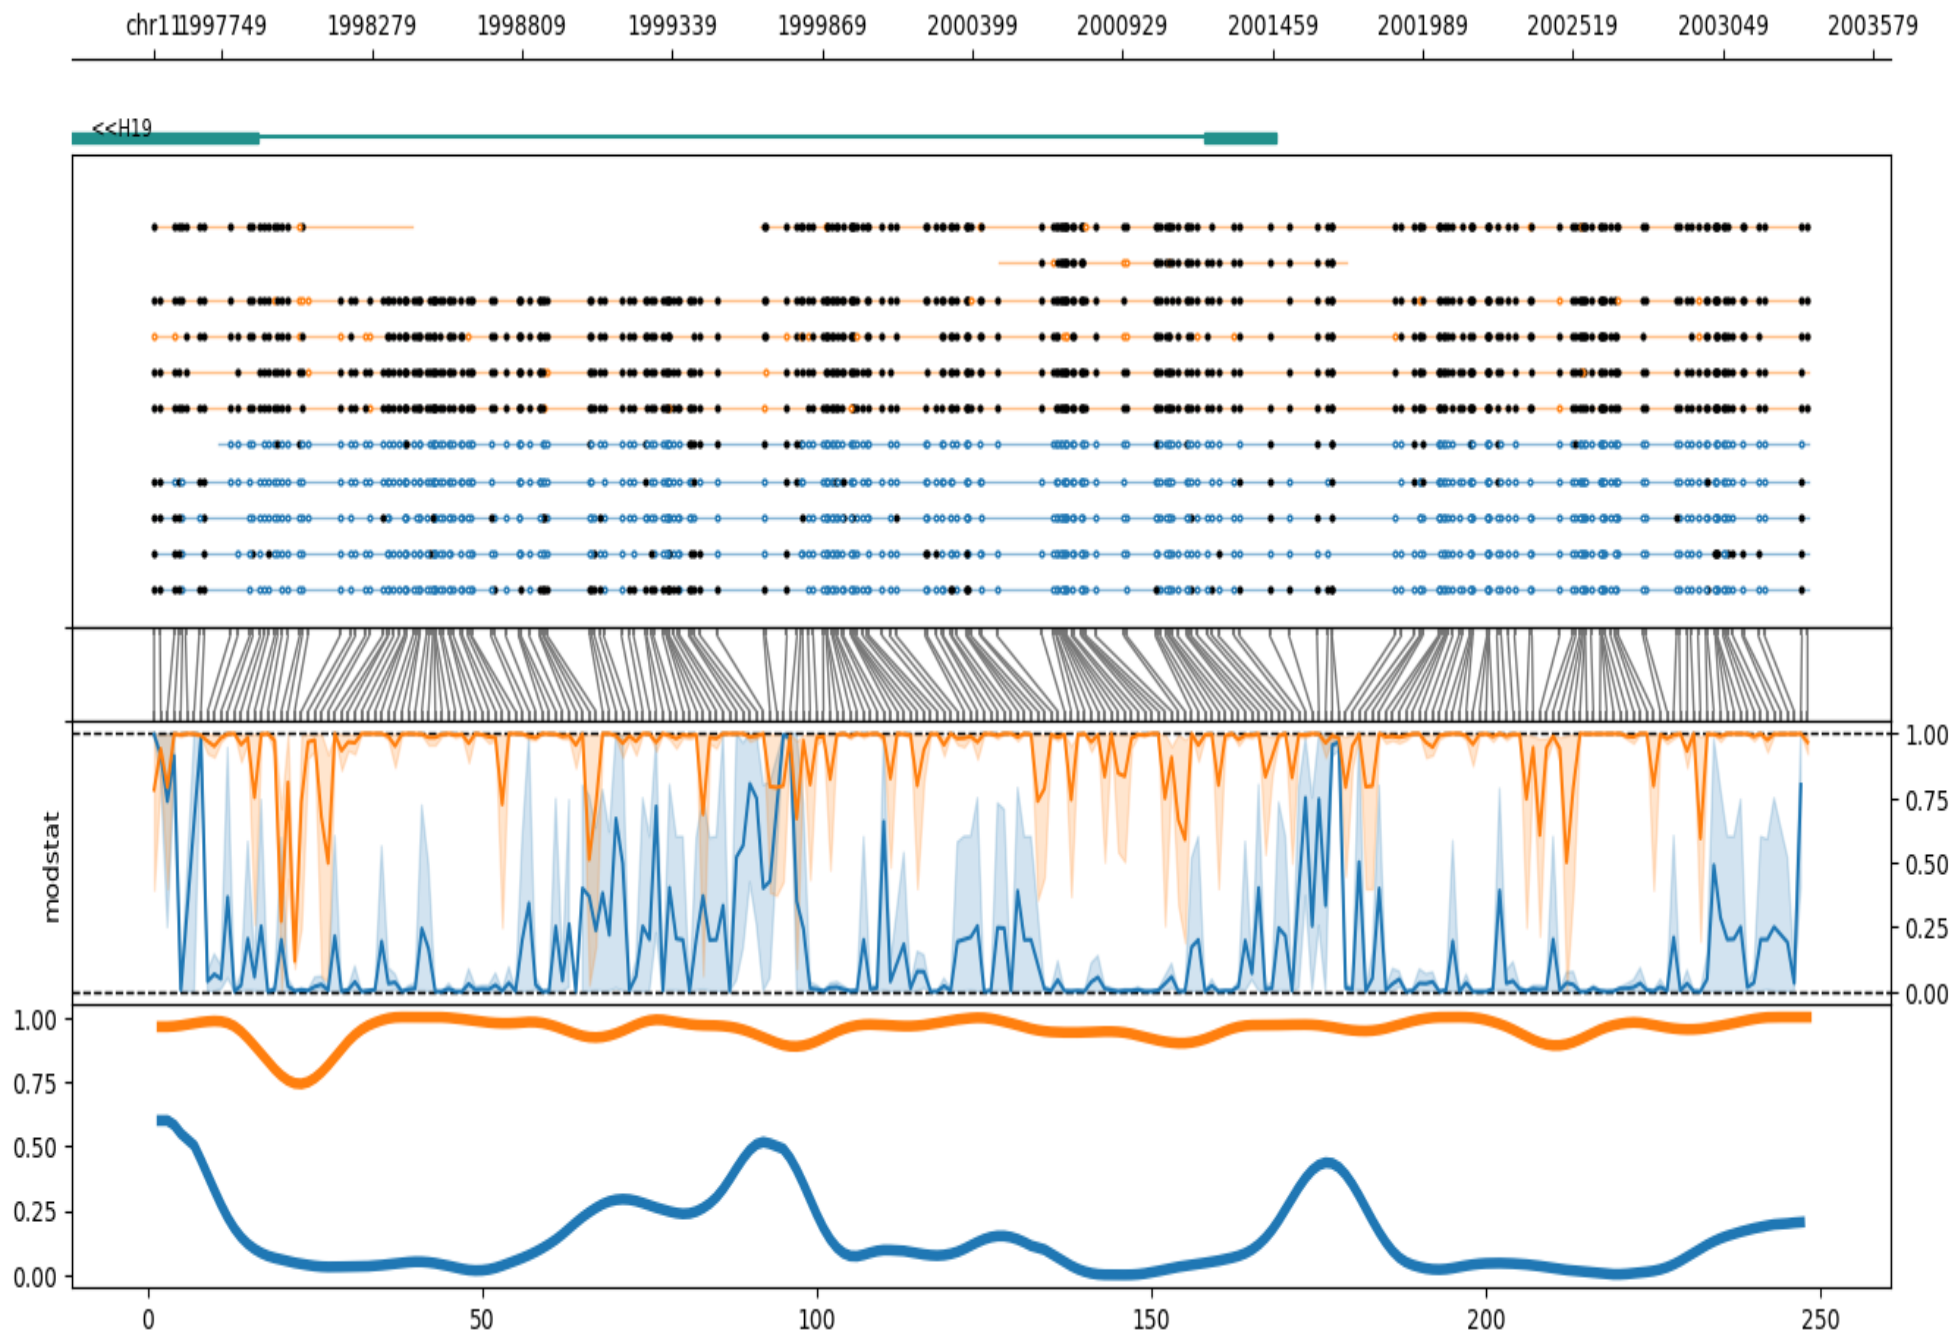



# EPI\_07\_hg38\_phased\_chr11\_2698155\_2701028

chr11 2698274 2698535 2698796 2699057 2699318 2699579 2699840 2700101 2700362 2700623 2700884 2701145

KCNQ1>>

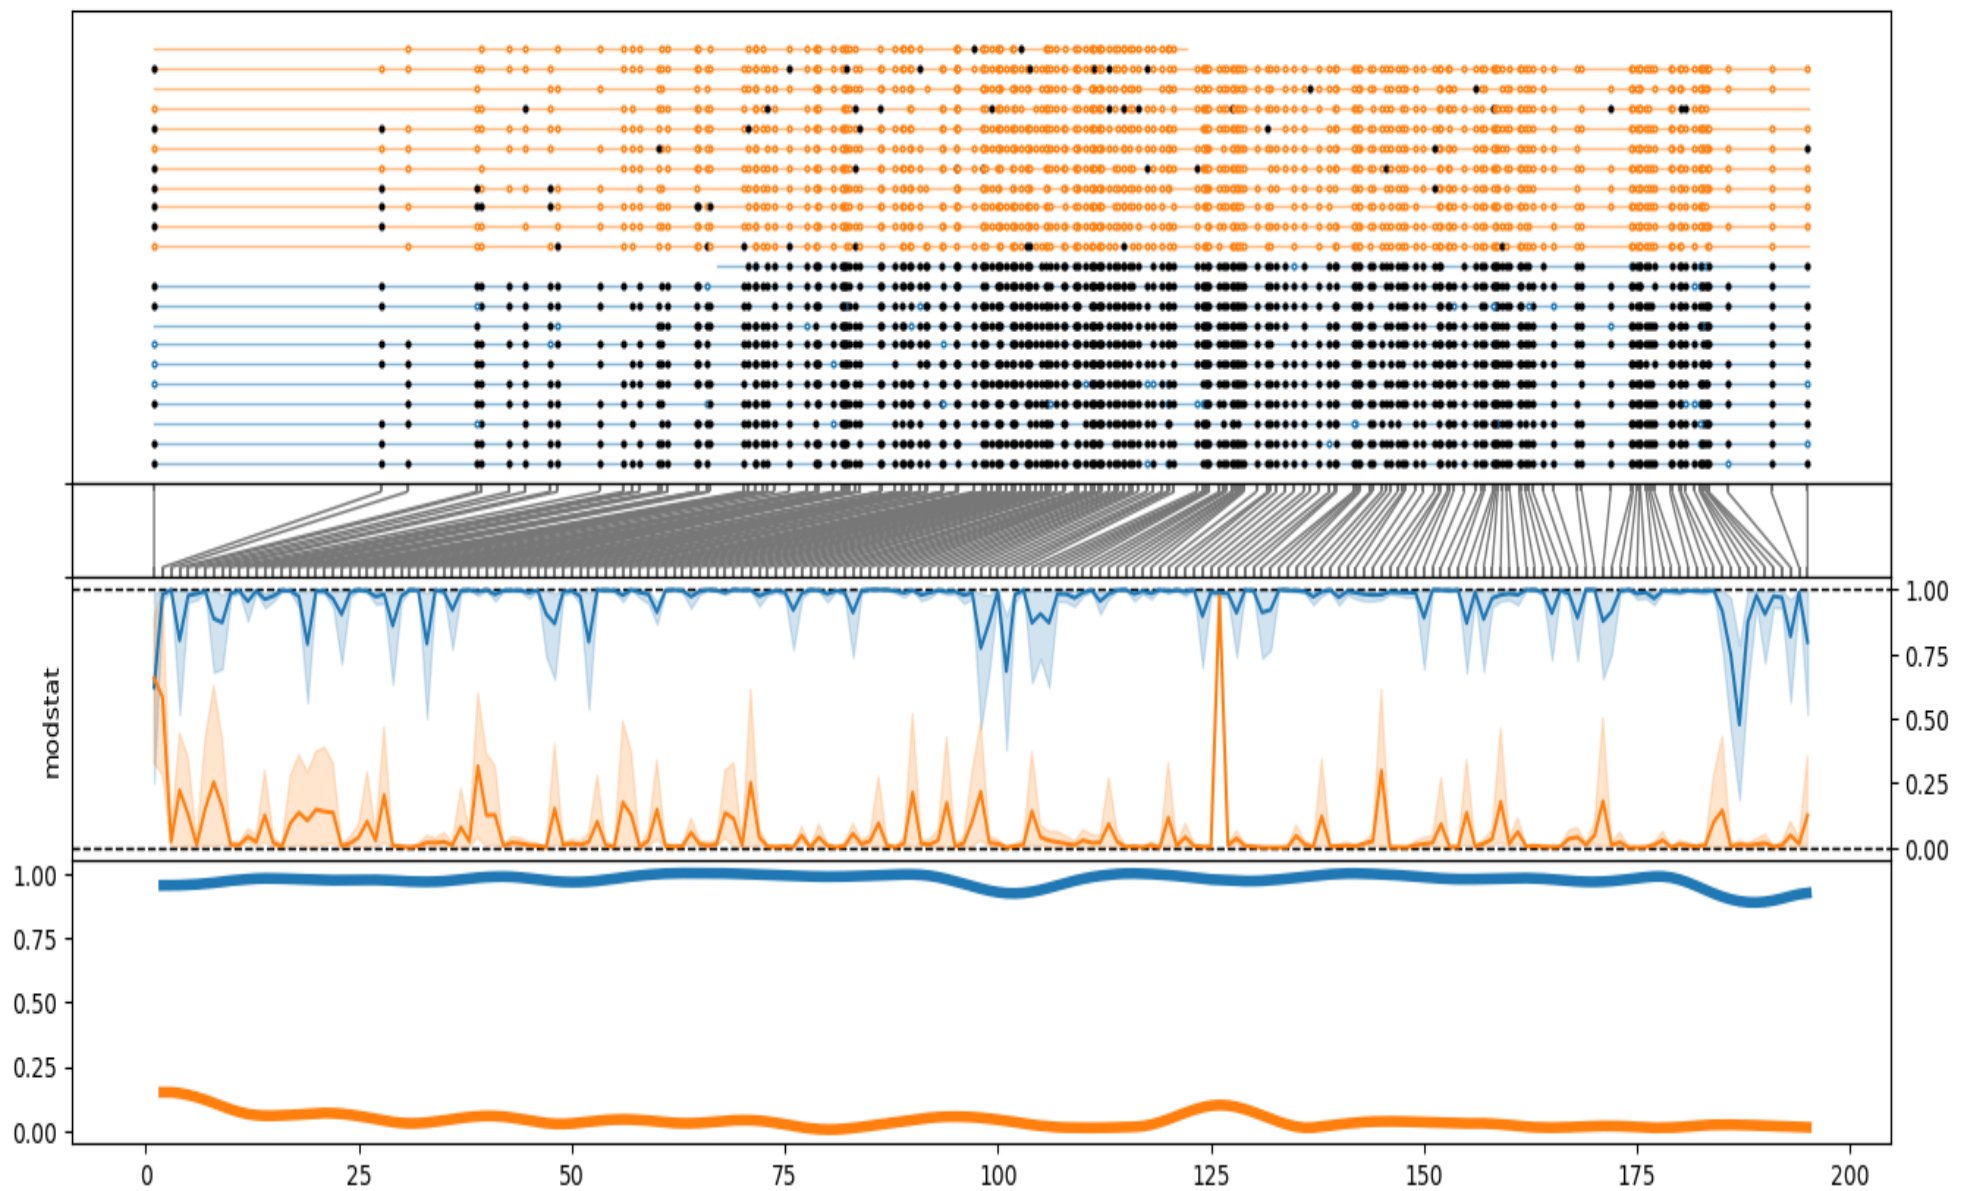

# EPI\_07\_hg38\_phased\_chr14\_100824185\_100827640

chr14 100824328 100824642 100824956 100825270 100825584 100825898 100826212 100826526 100826840 100827154 100827468 100827782

MEG3>>

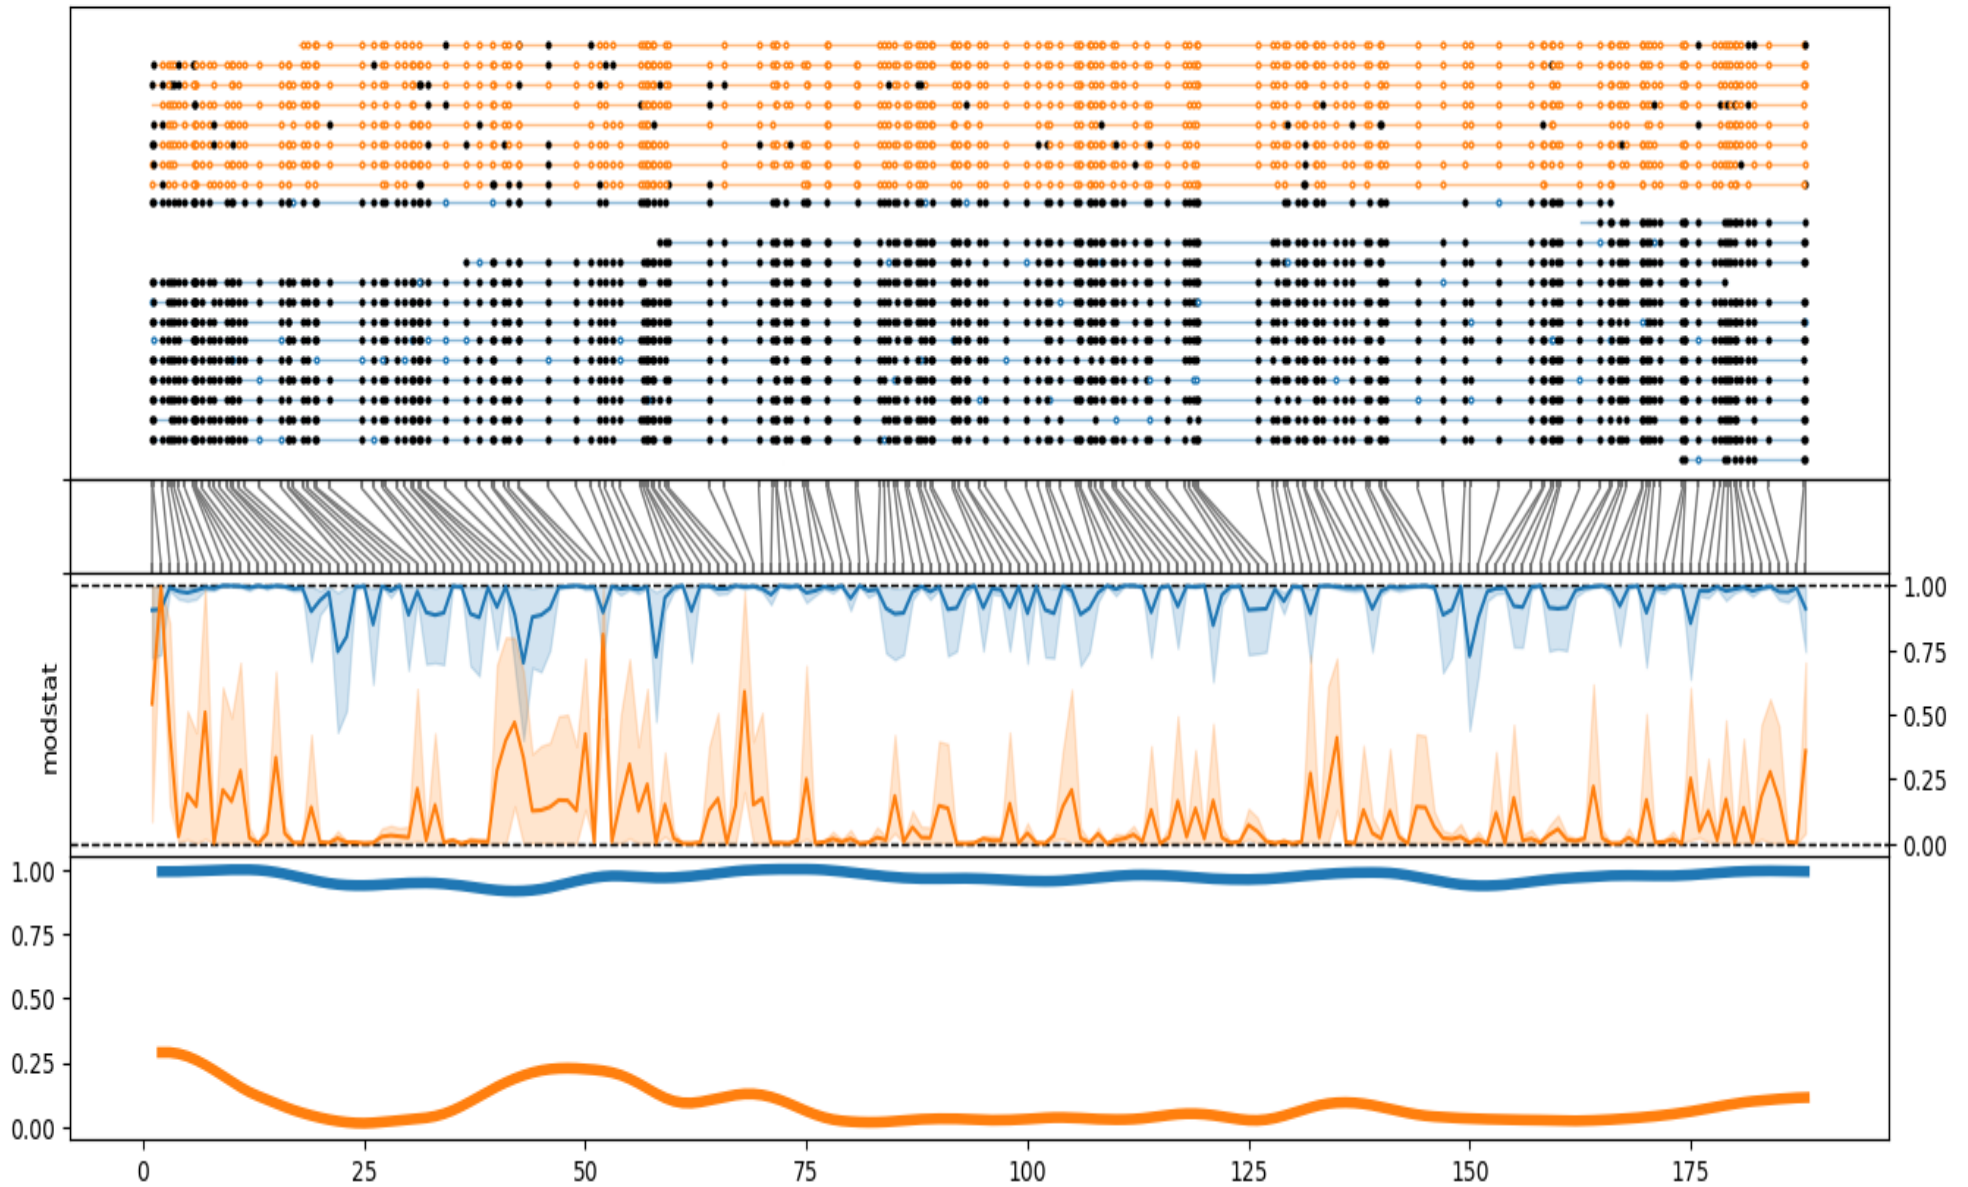

# EPI\_07\_hg38\_phased\_chr14\_100904325\_100905081

chr14 100904356 100904424 100904492 100904560 100904628 100904696 100904764 100904832 100904900 100904968 100905036 100905104

MEG8>>

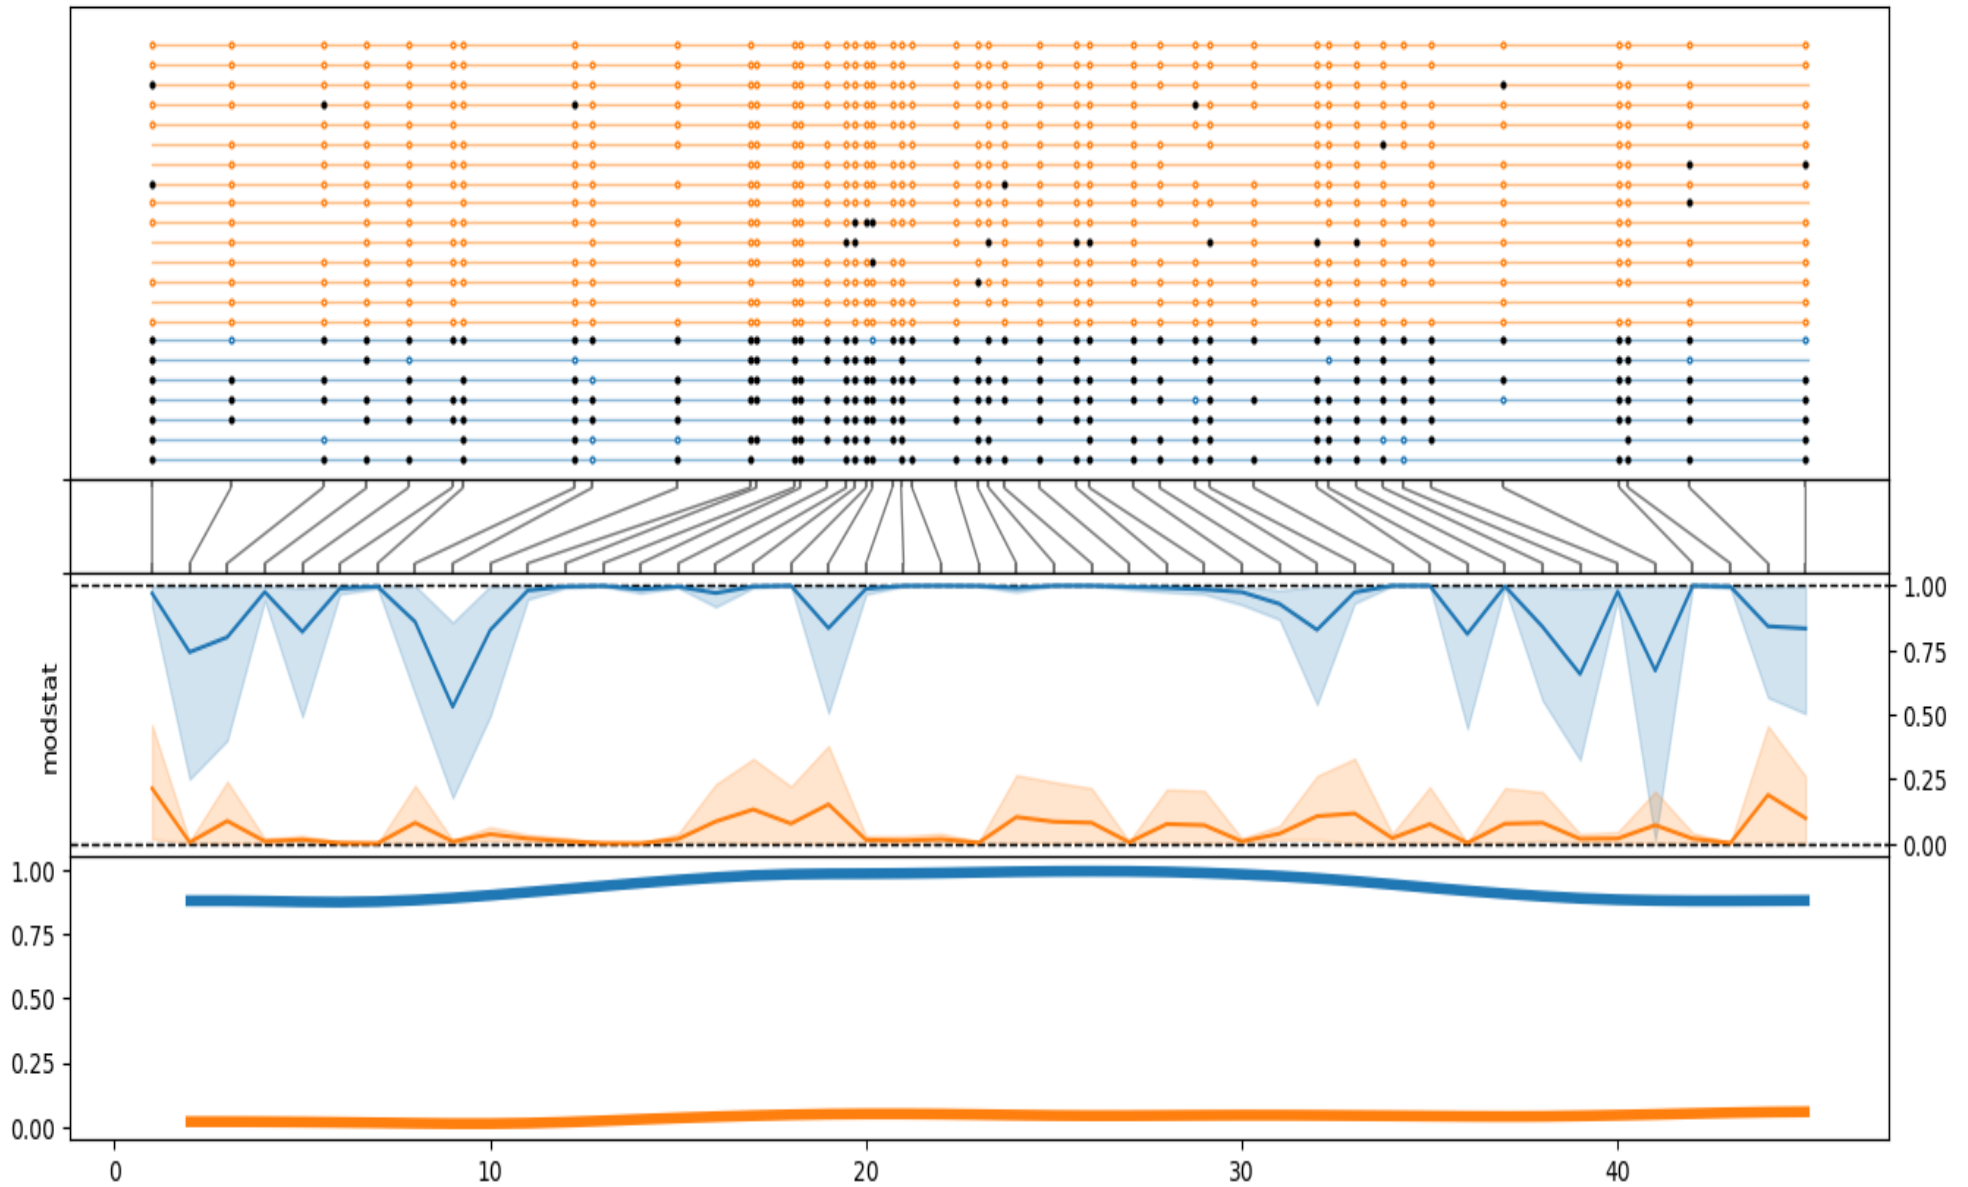

# EPI\_07\_hg38\_phased\_chr15\_23647178\_23648424

chr15:23647229 23647342 23647455 23647568 23647681 23647794 23647907 23648020 23648133 23648246 23648359 23648472

<<MAGEL2

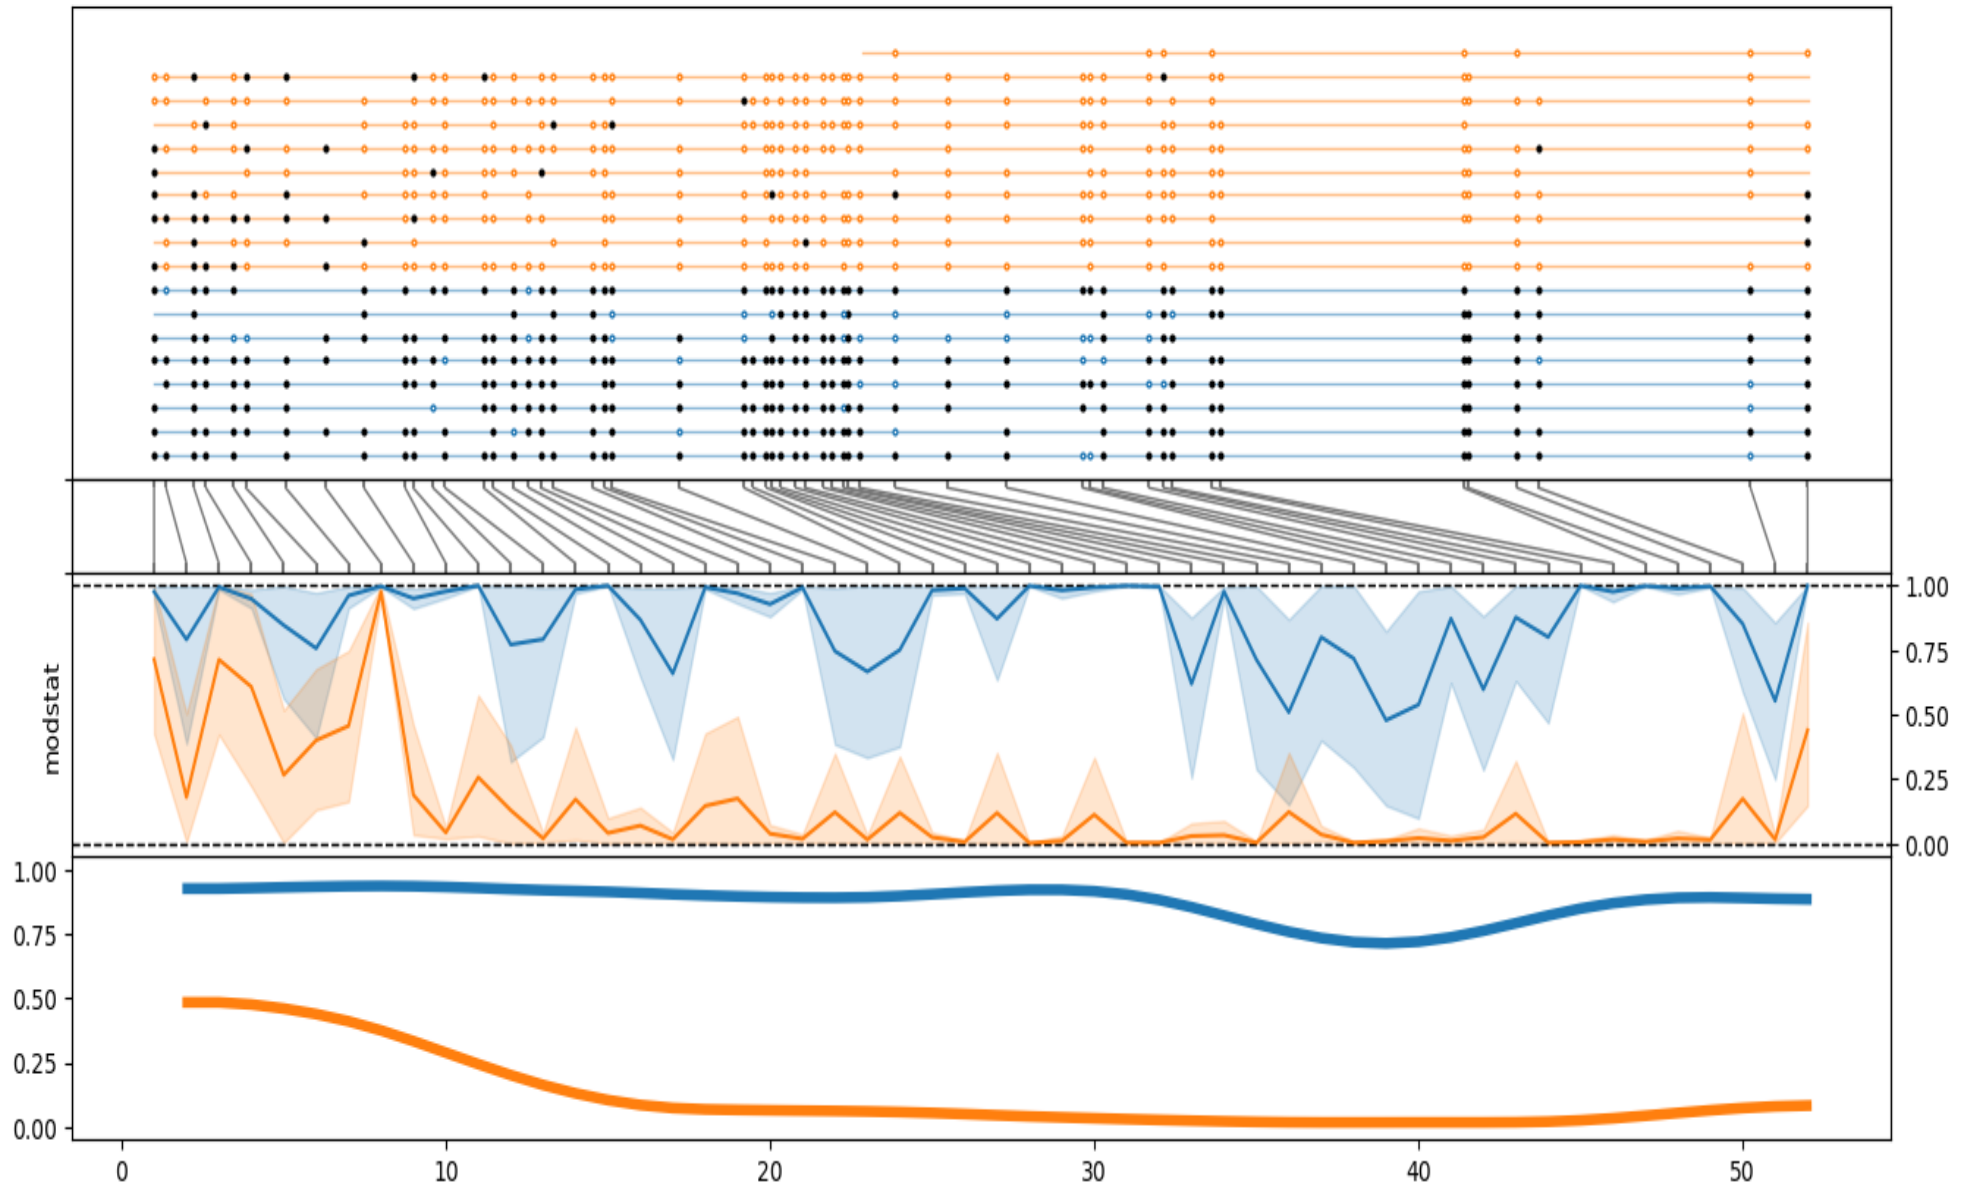



# EPI\_07\_hg38\_phased\_chromosome15\_24954564\_24956828

chr15 24954657 24954862 24955067 24955272 24955477 24955682 24955887 24956092 24956297 24956502 24956707 24956912

SNRPN>>

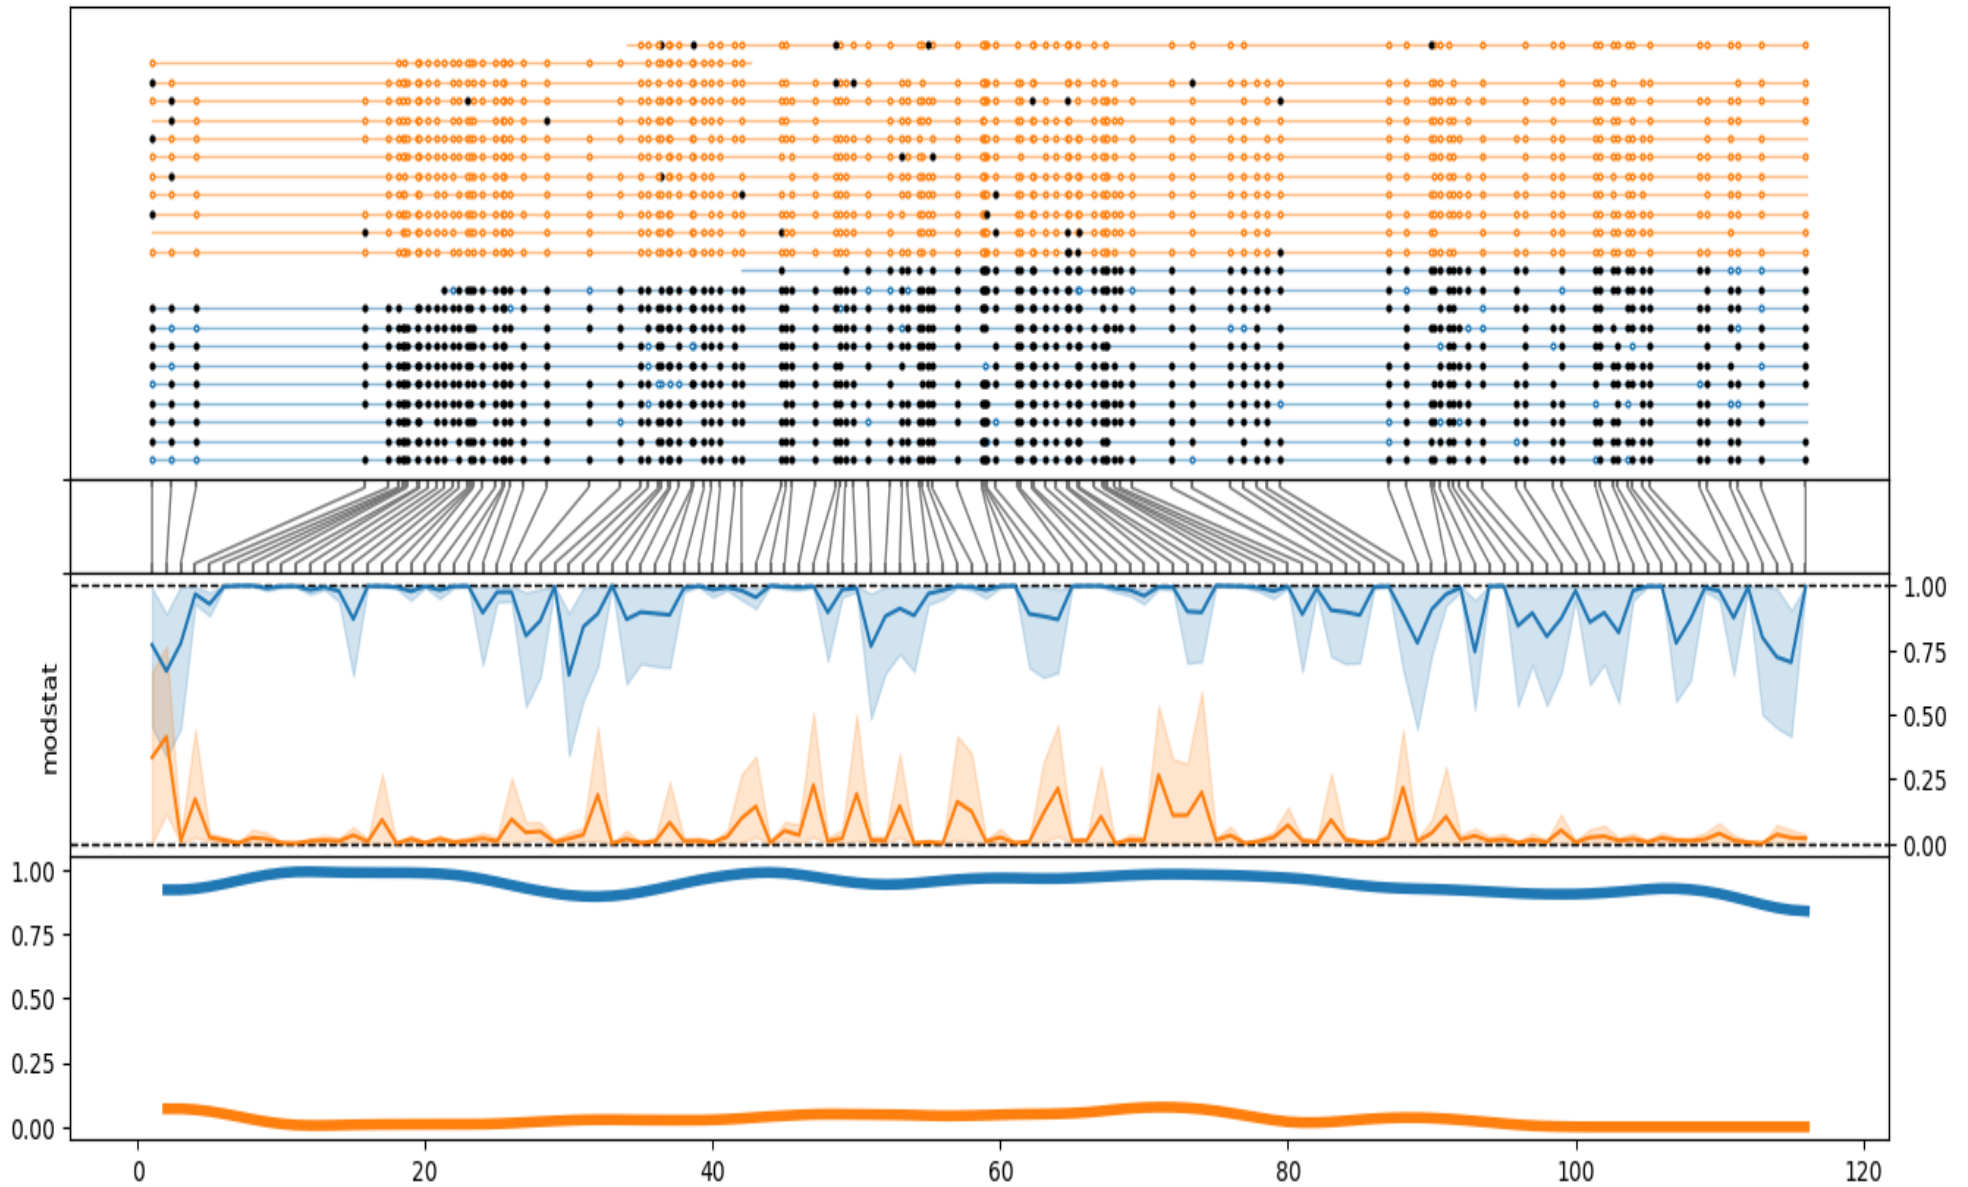

# EPI\_07\_hg38\_phased\_chrX\_134372110\_134374891

chrX 134372223 134372475 134372727 134372979 134373231 134373483 134373735 134373987 134374239 134374491 134374743 134374995

PHF6>>

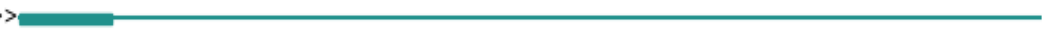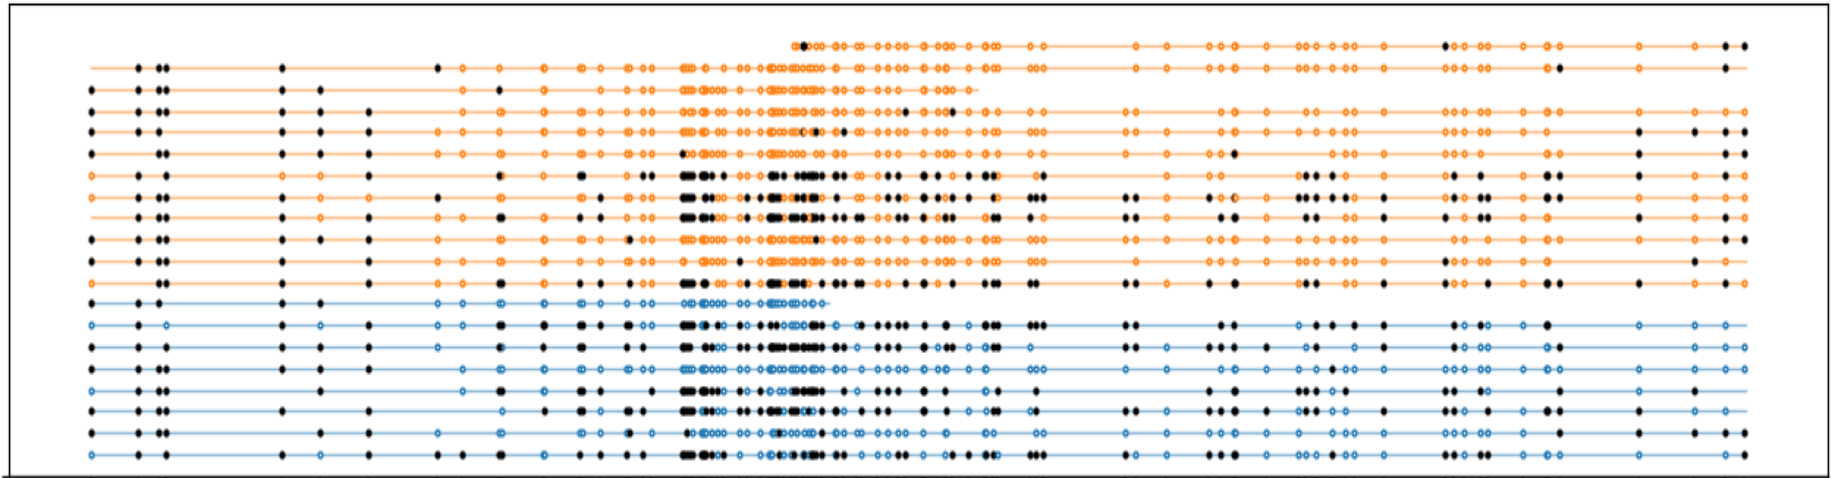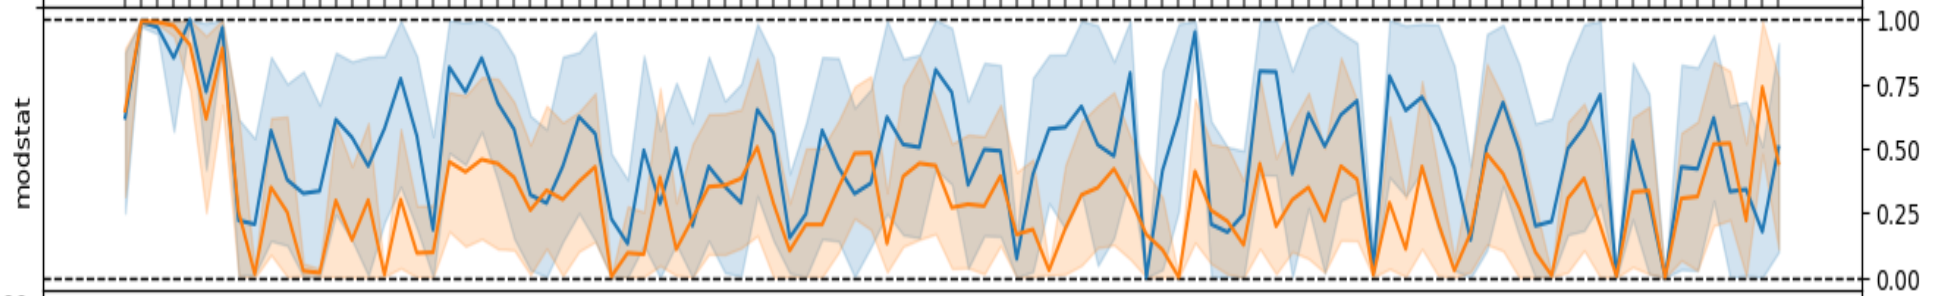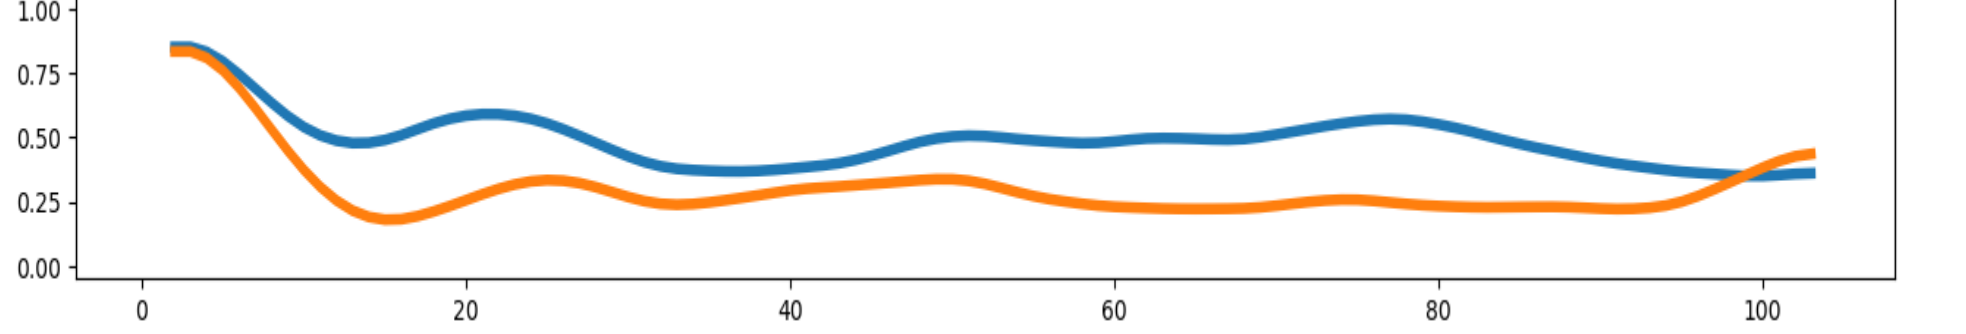

# EPI\_07\_hg38\_phased\_chrX\_46836539\_46837273

chrX 46836569 46836635 46836701 46836767 46836833 46836899 46836965 46837031 46837097 46837163 46837229 46837295

RP2>>

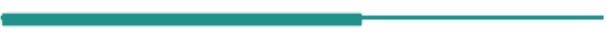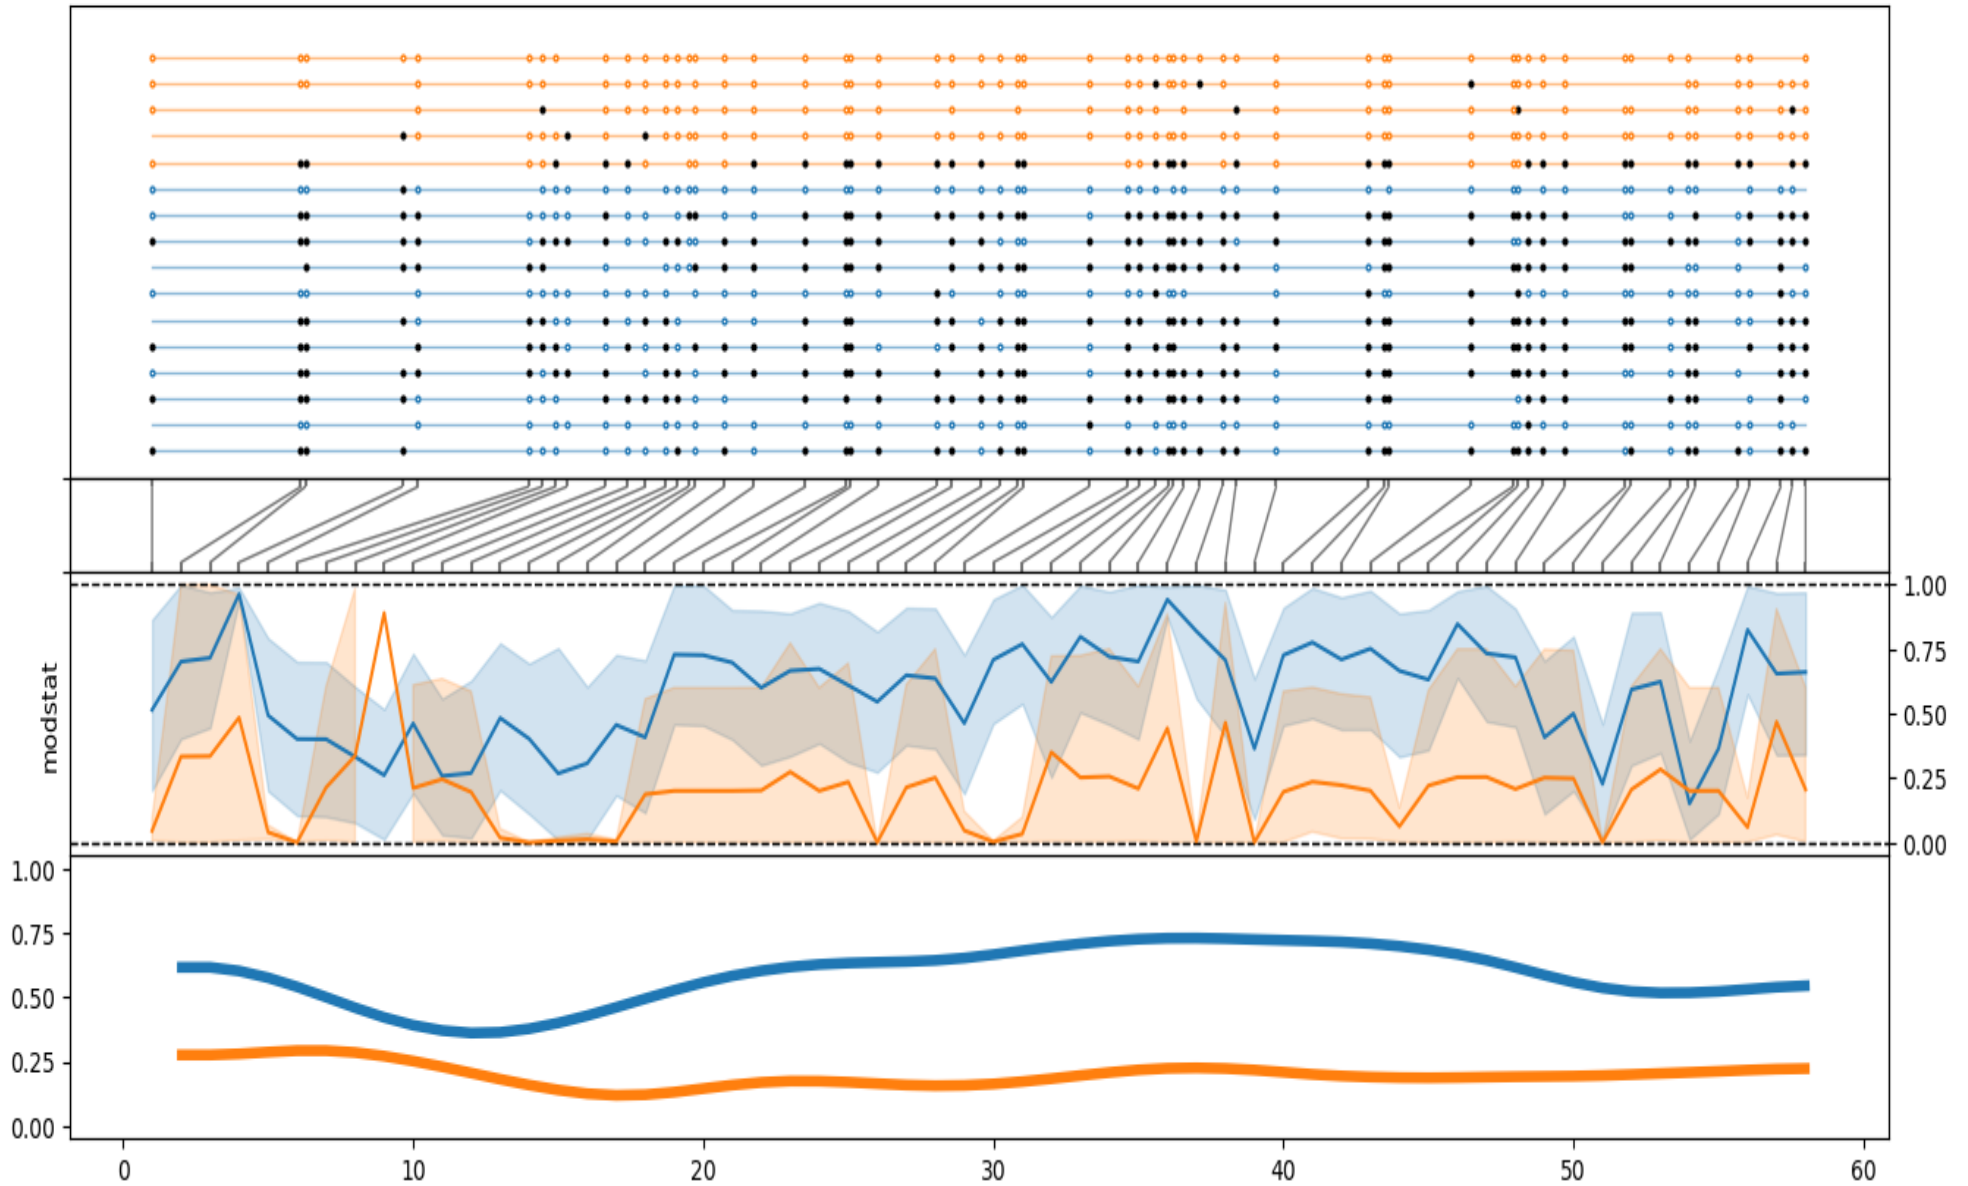

# EPI\_07\_hg38\_phased\_chrX\_67543761\_67546170

chr67543860 67544079 67544298 67544517 67544736 67544955 67545174 67545393 67545612 67545831 67546050 67546269

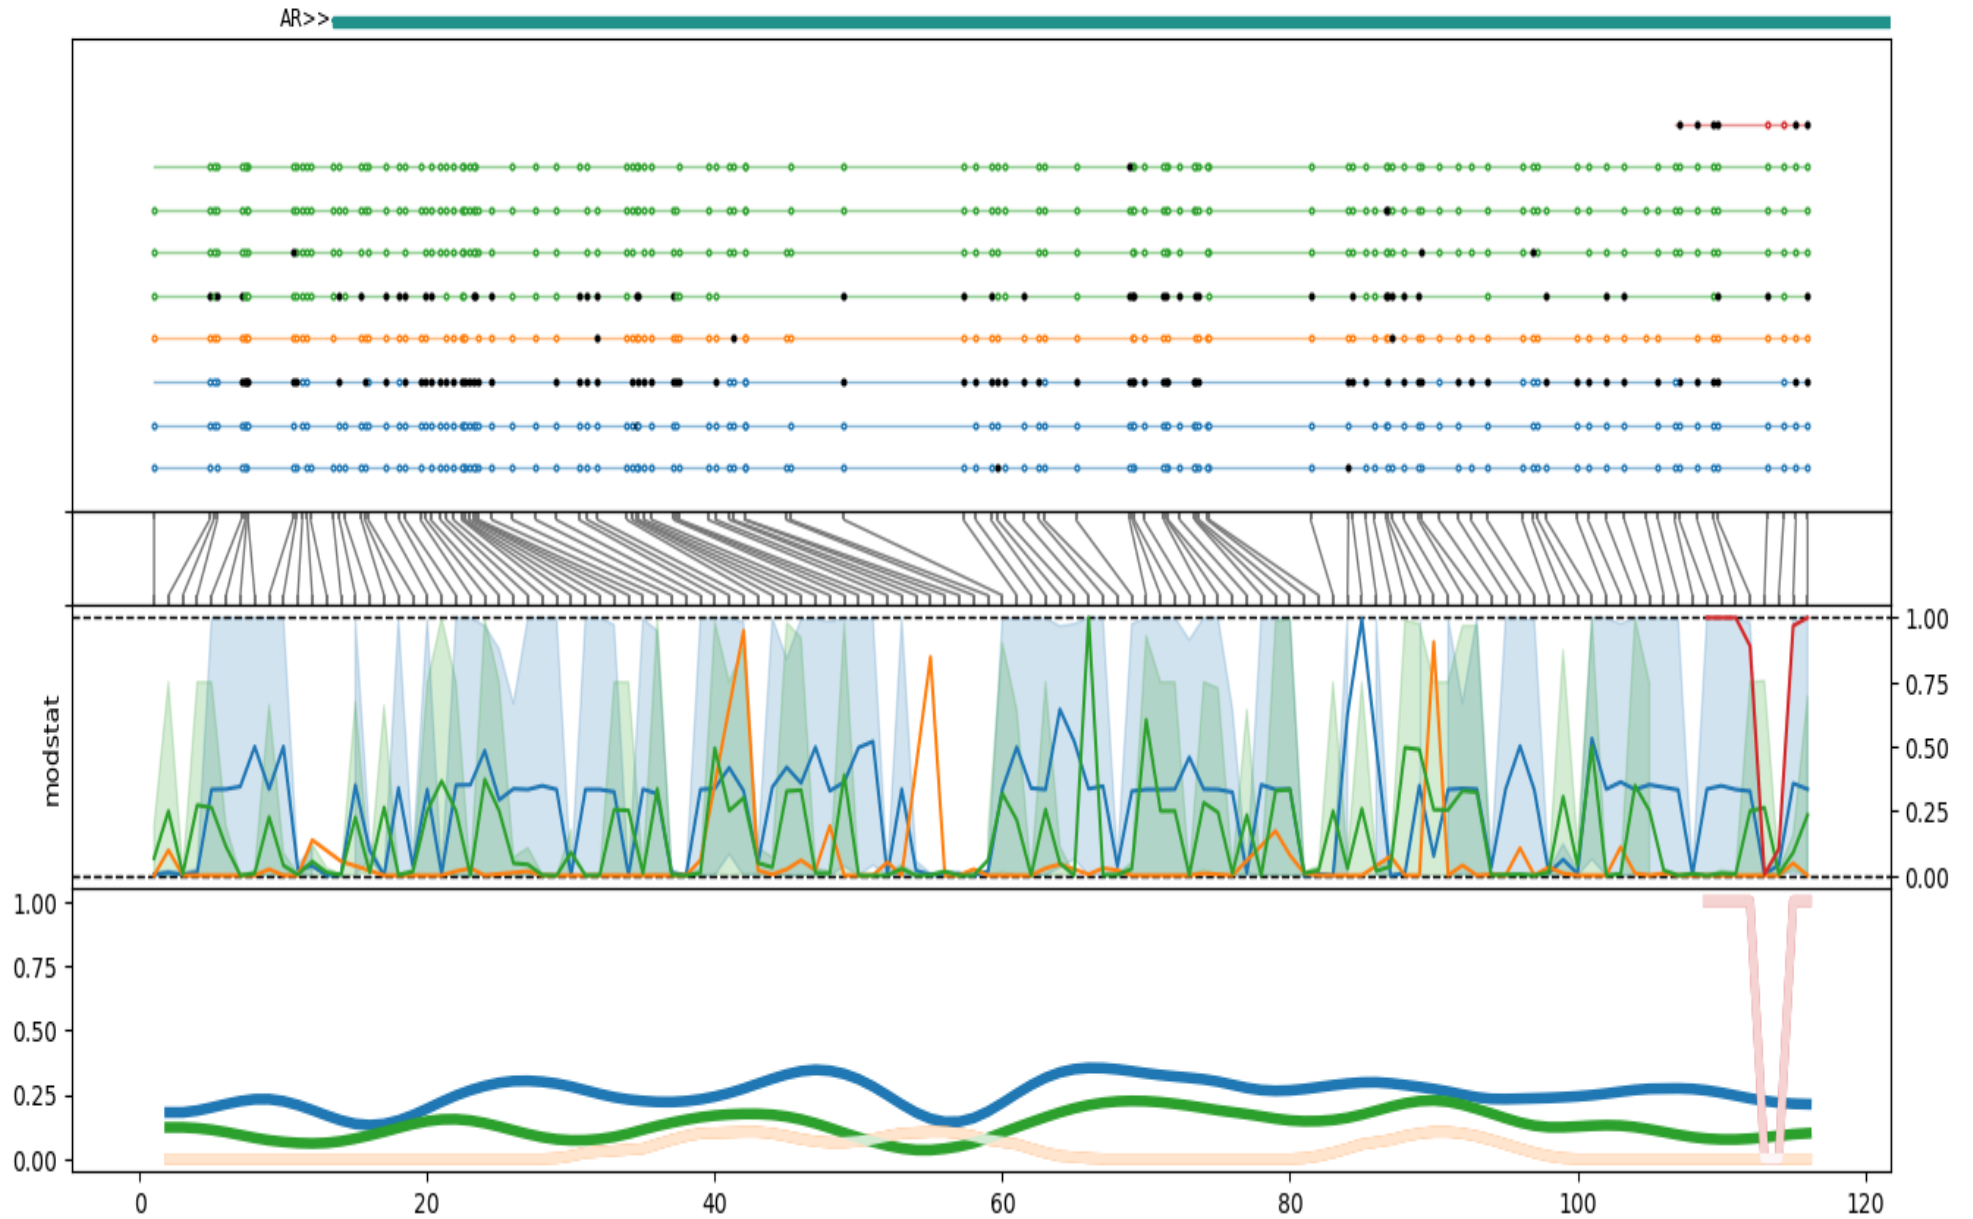



# EPI\_08\_hg38\_phased\_chr11\_1997509\_2003349

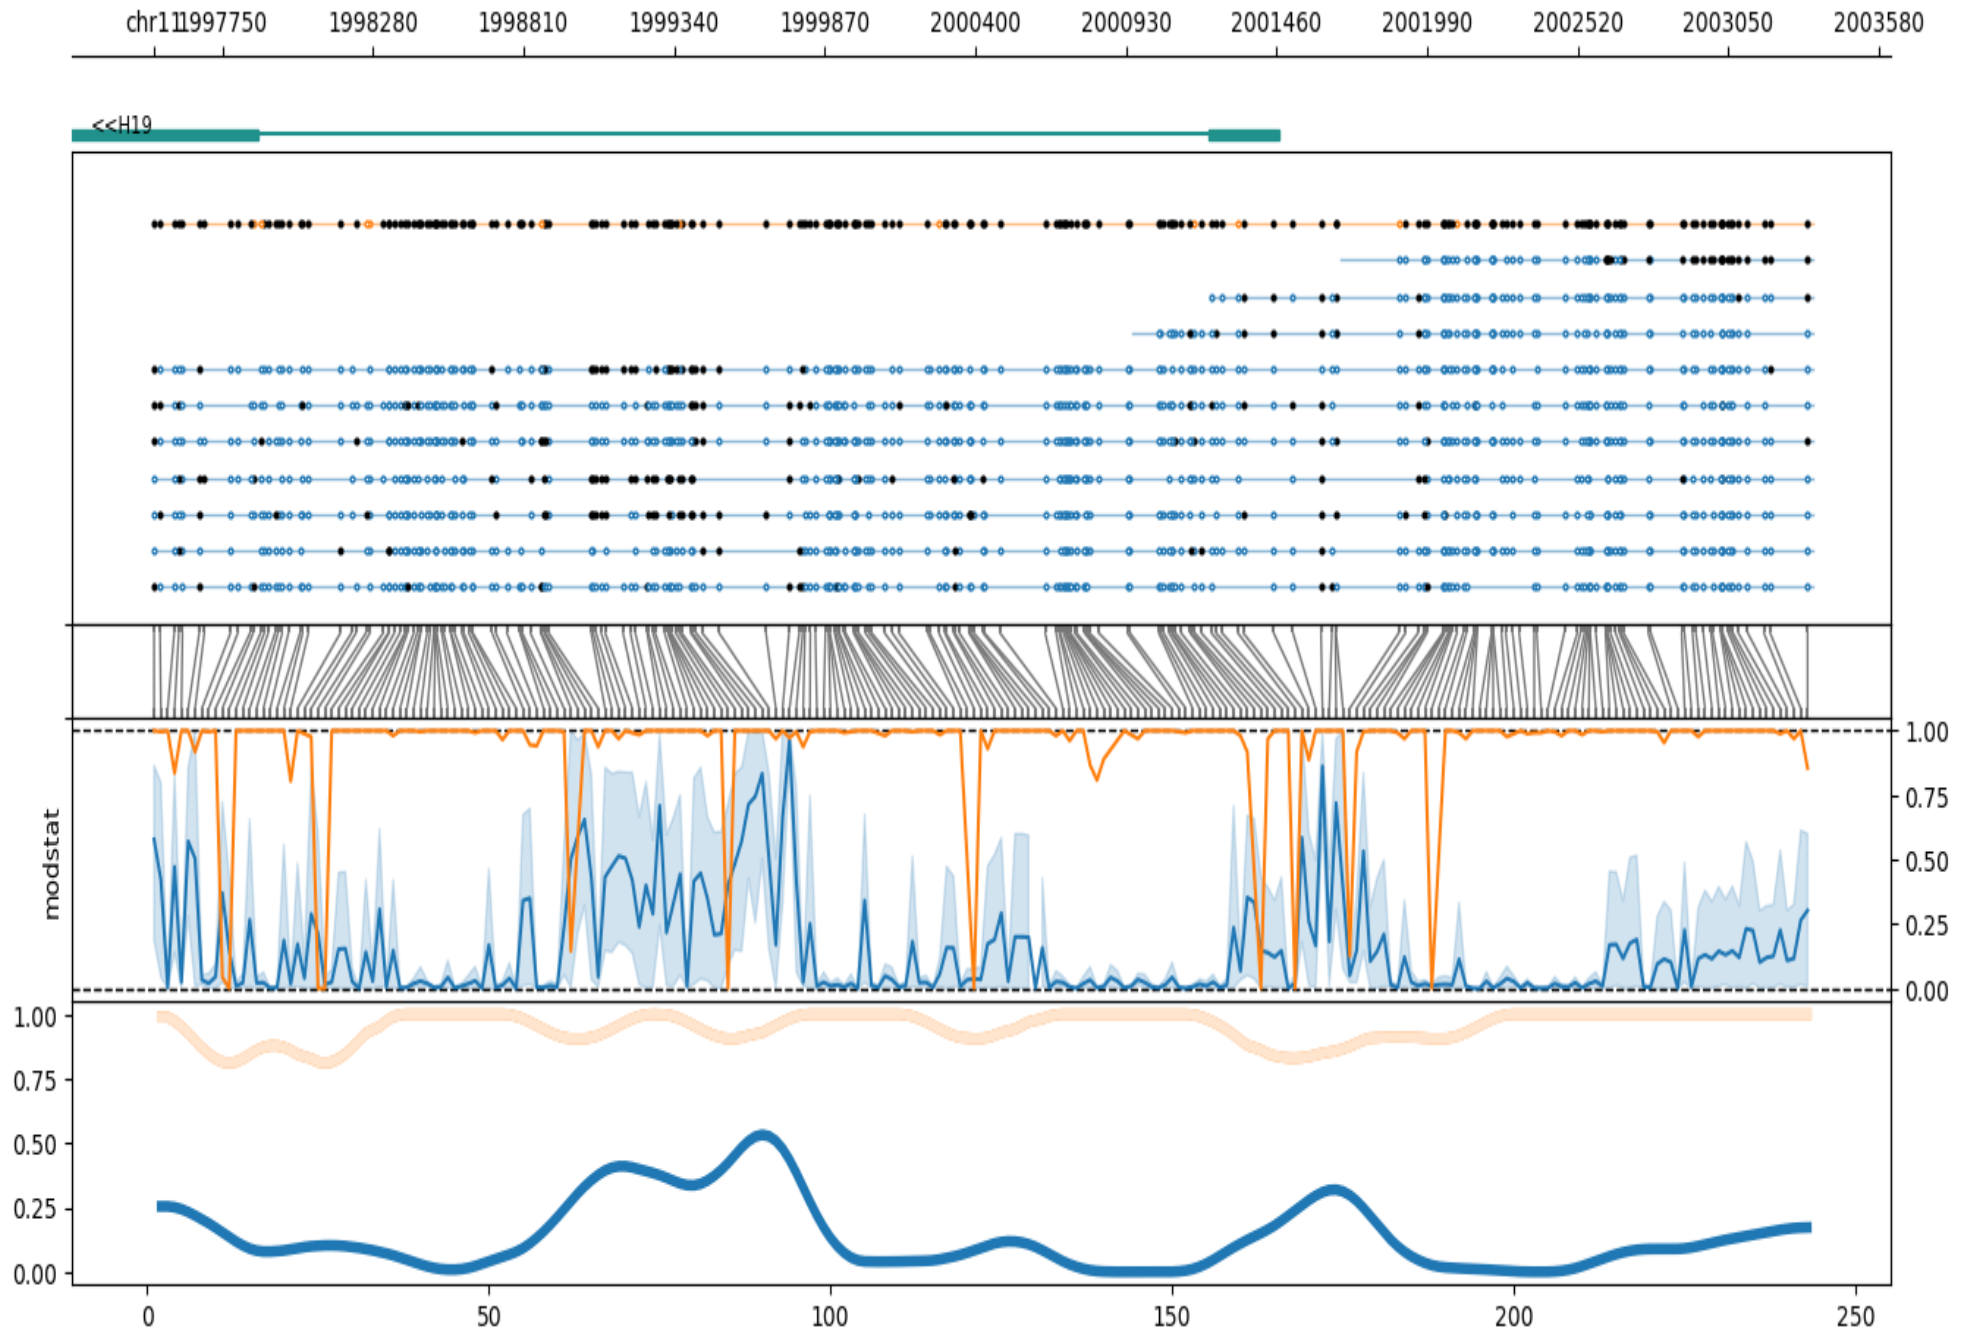

# EPI\_08\_hg38\_phased\_chr11\_2698155\_2701028

chr11:2698274 2698535 2698796 2699057 2699318 2699579 2699840 2700101 2700362 2700623 2700884 2701145

KCNQ1>>

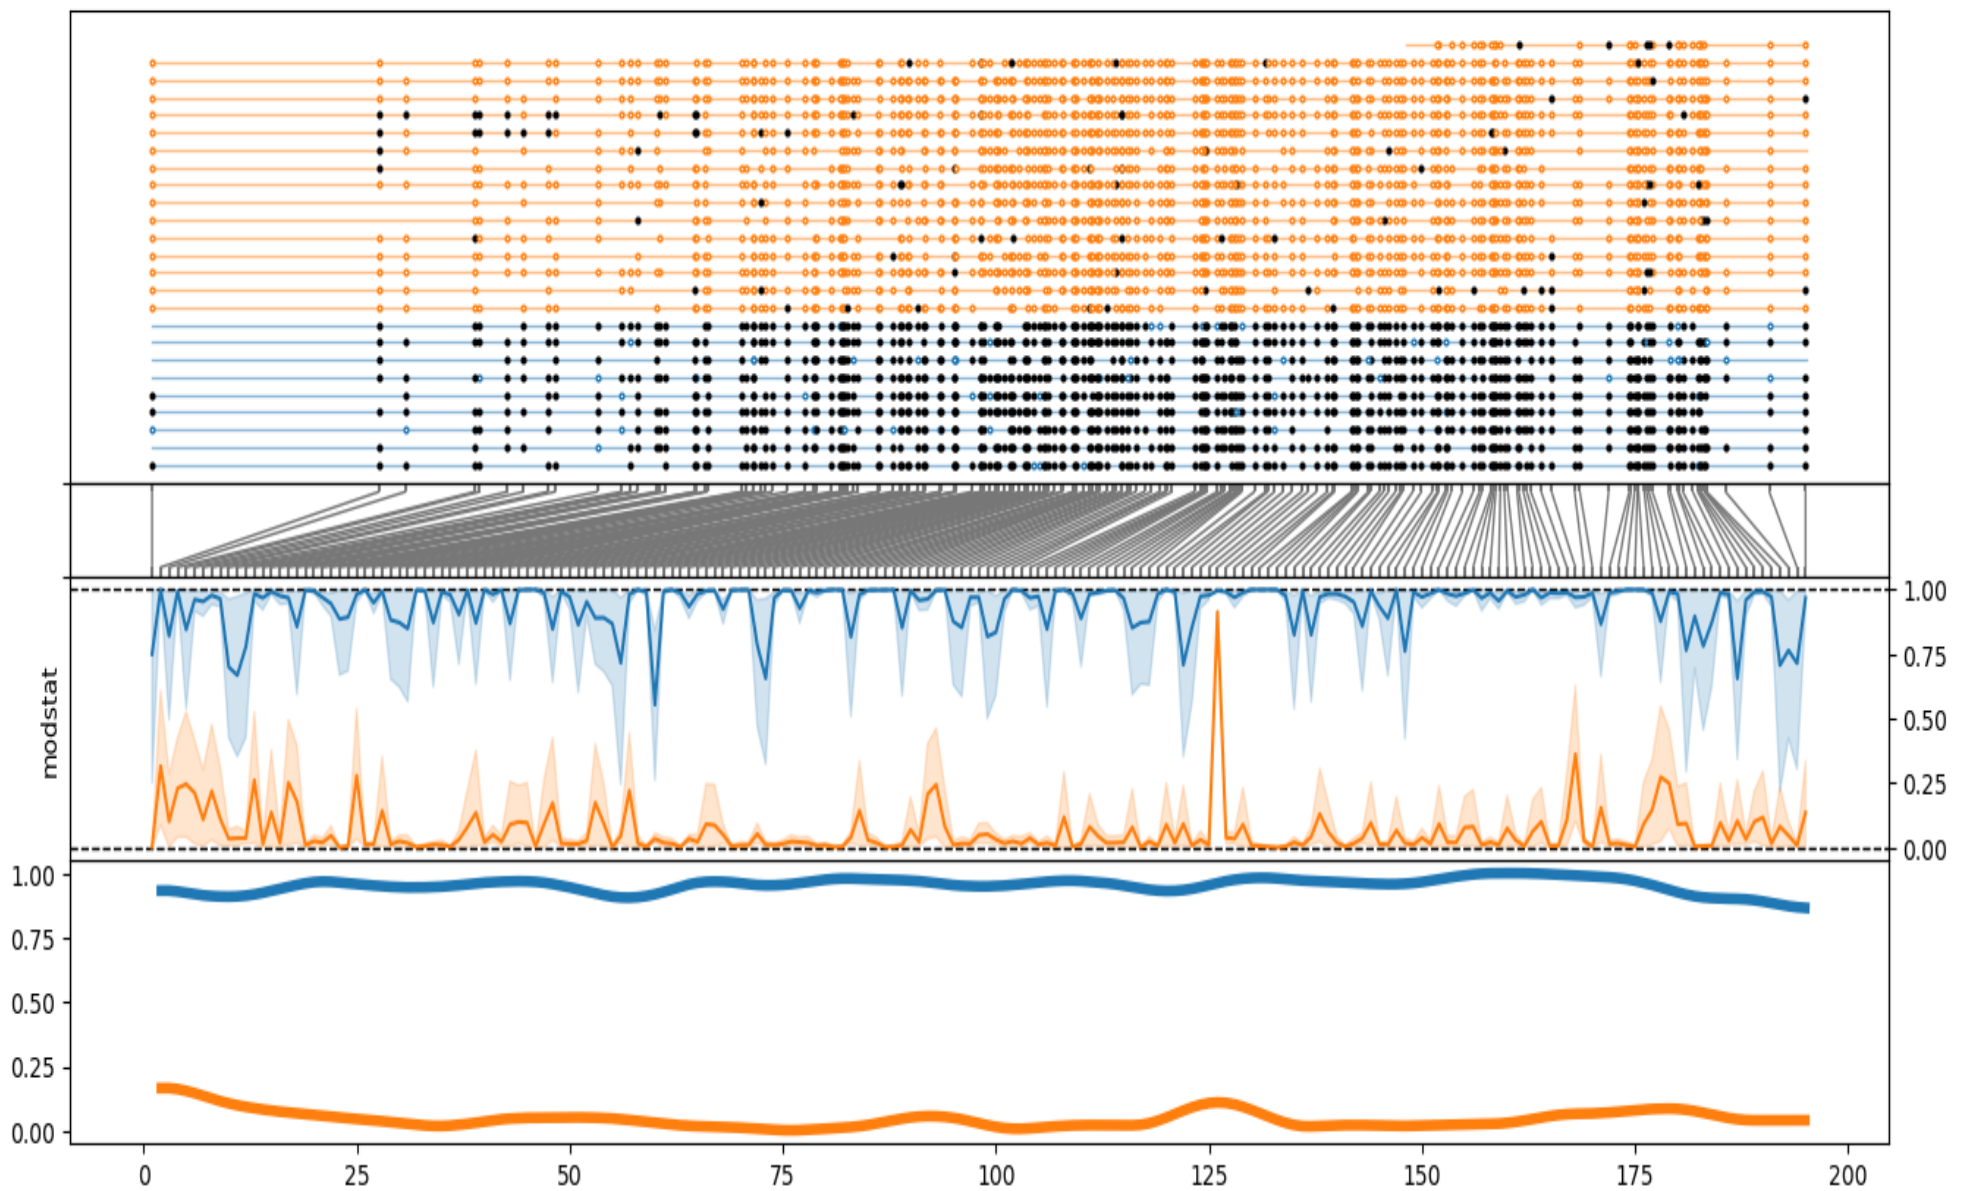

# EPI\_08\_hg38\_phased\_chr14\_100824185\_100827640

chr14 100824328 100824642 100824956 100825270 100825584 100825898 100826212 100826526 100826840 100827154 100827468 100827782

MEG3>>

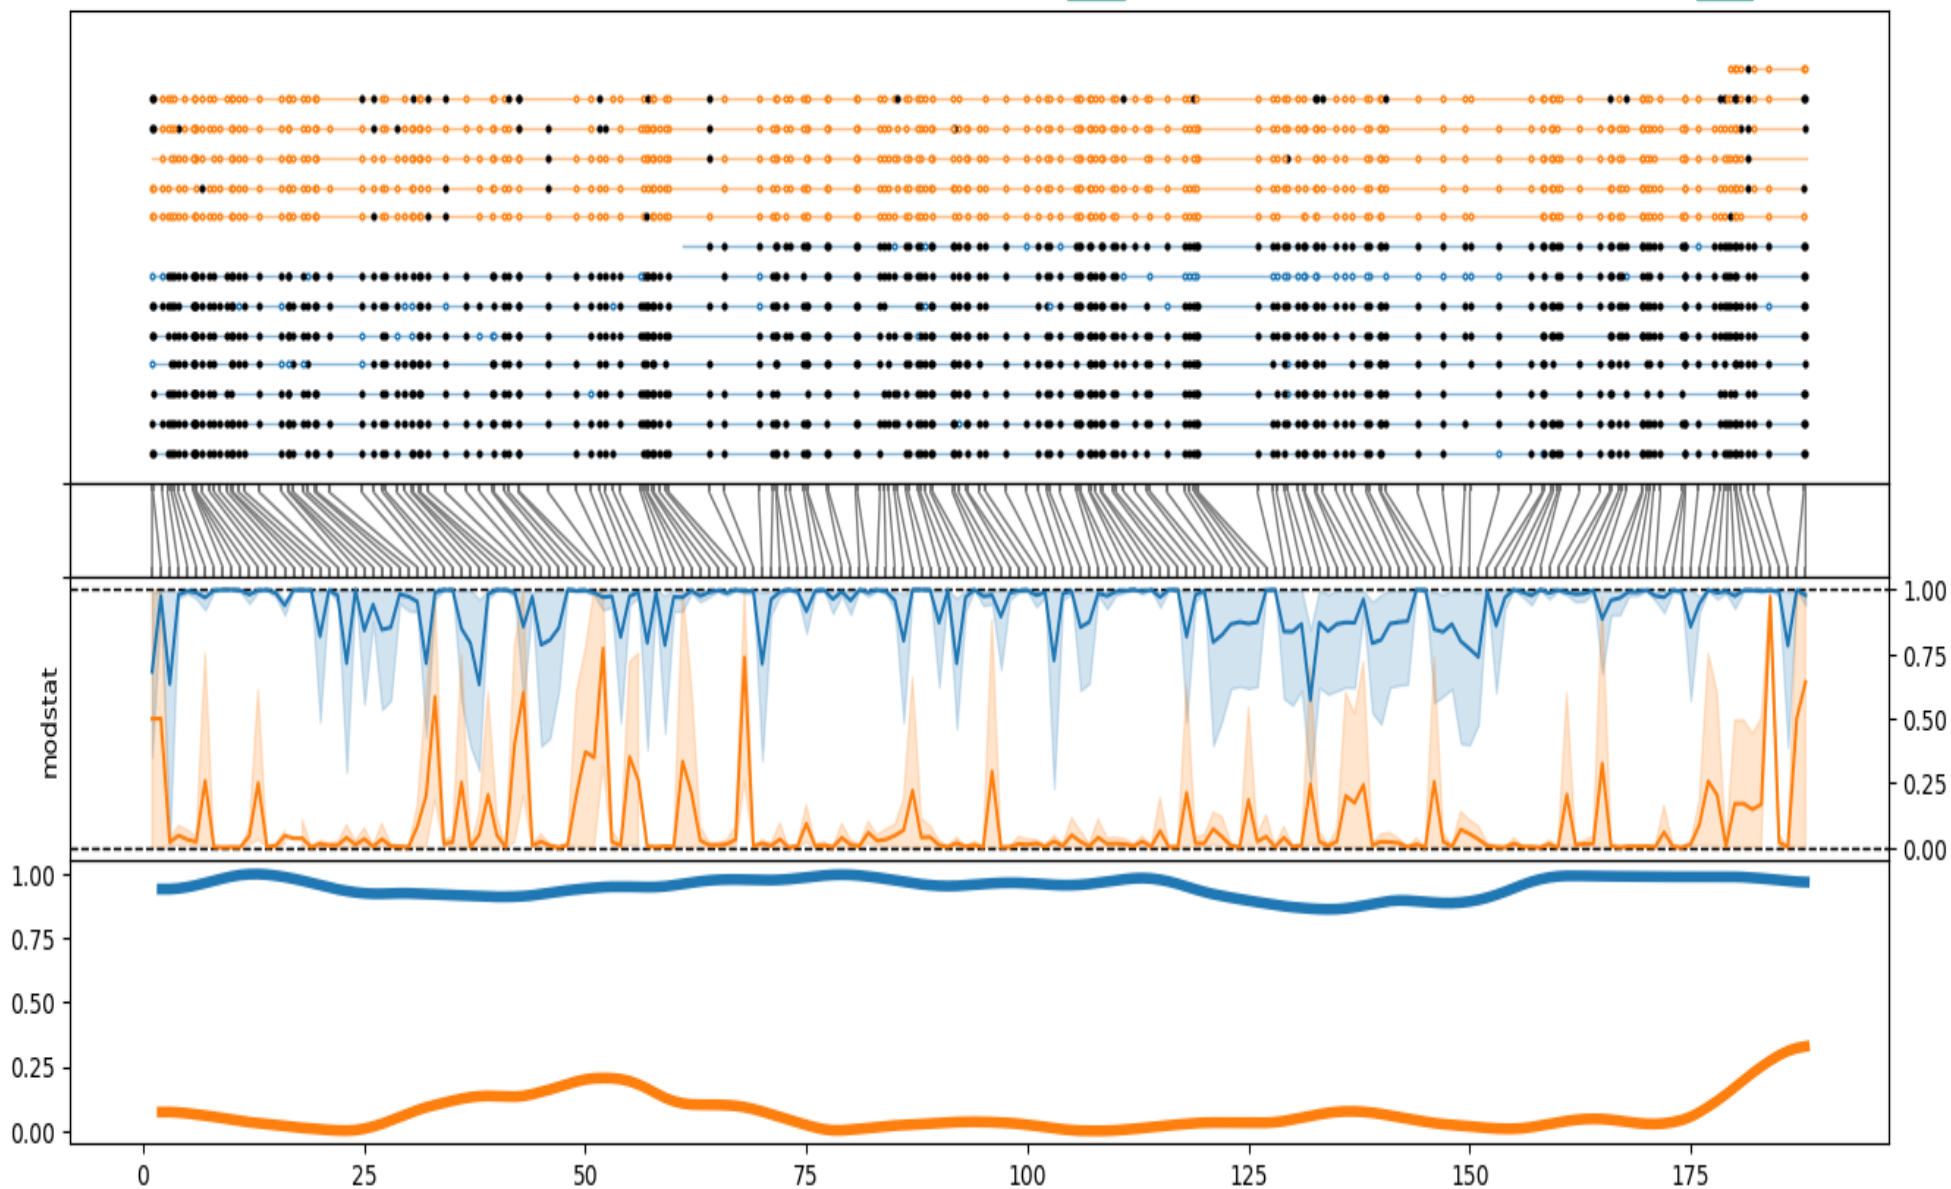

# EPI\_08\_hg38\_phased\_chr14\_100904325\_100905081

chr14 100904356 100904424 100904492 100904560 100904628 100904696 100904764 100904832 100904900 100904968 100905036 100905104

MEG8>>

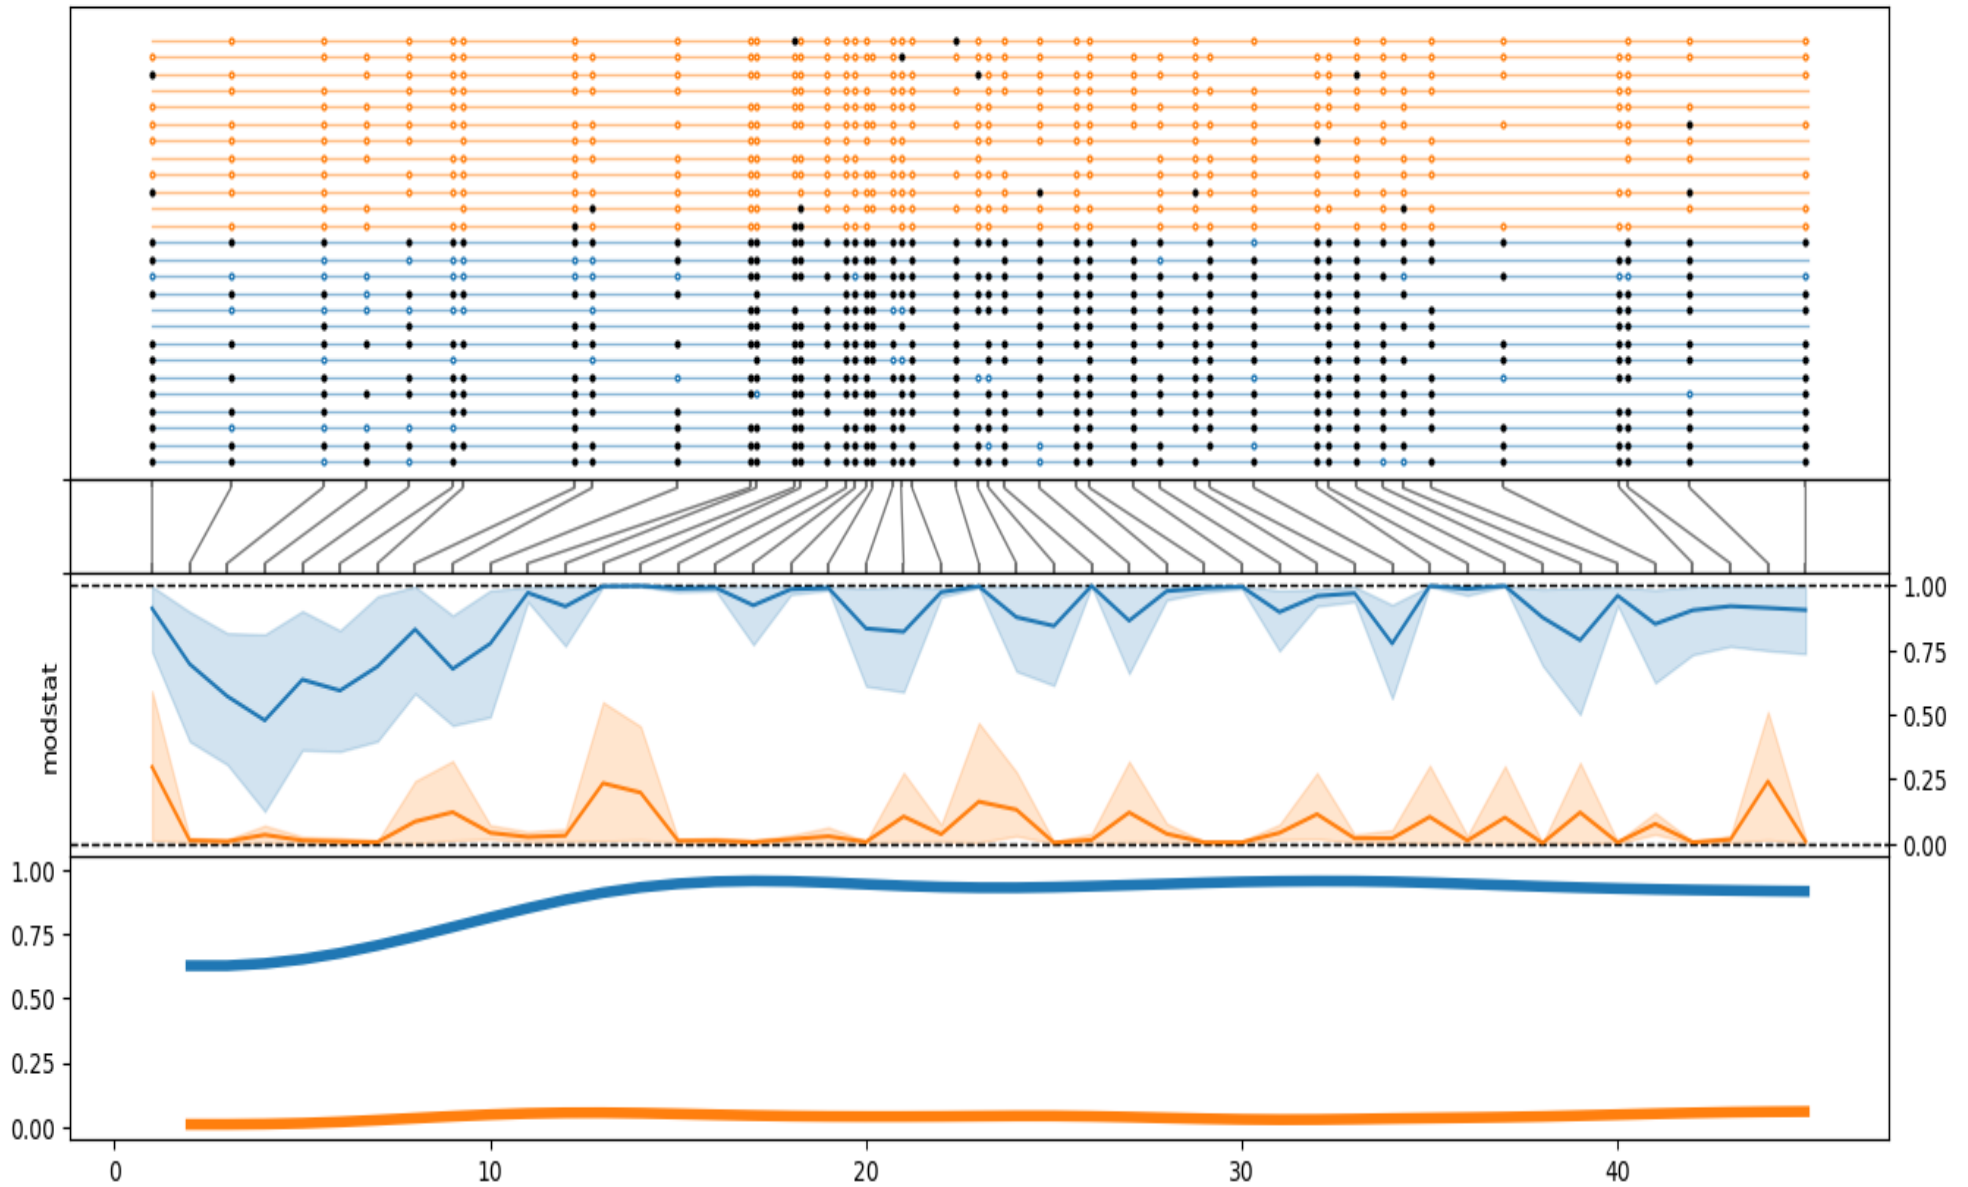



# EPI\_08\_hg38\_phased\_chr15\_23647178\_23648424

chr15:23647229 23647342 23647455 23647568 23647681 23647794 23647907 23648020 23648133 23648246 23648359 23648472

<<MAGEL2

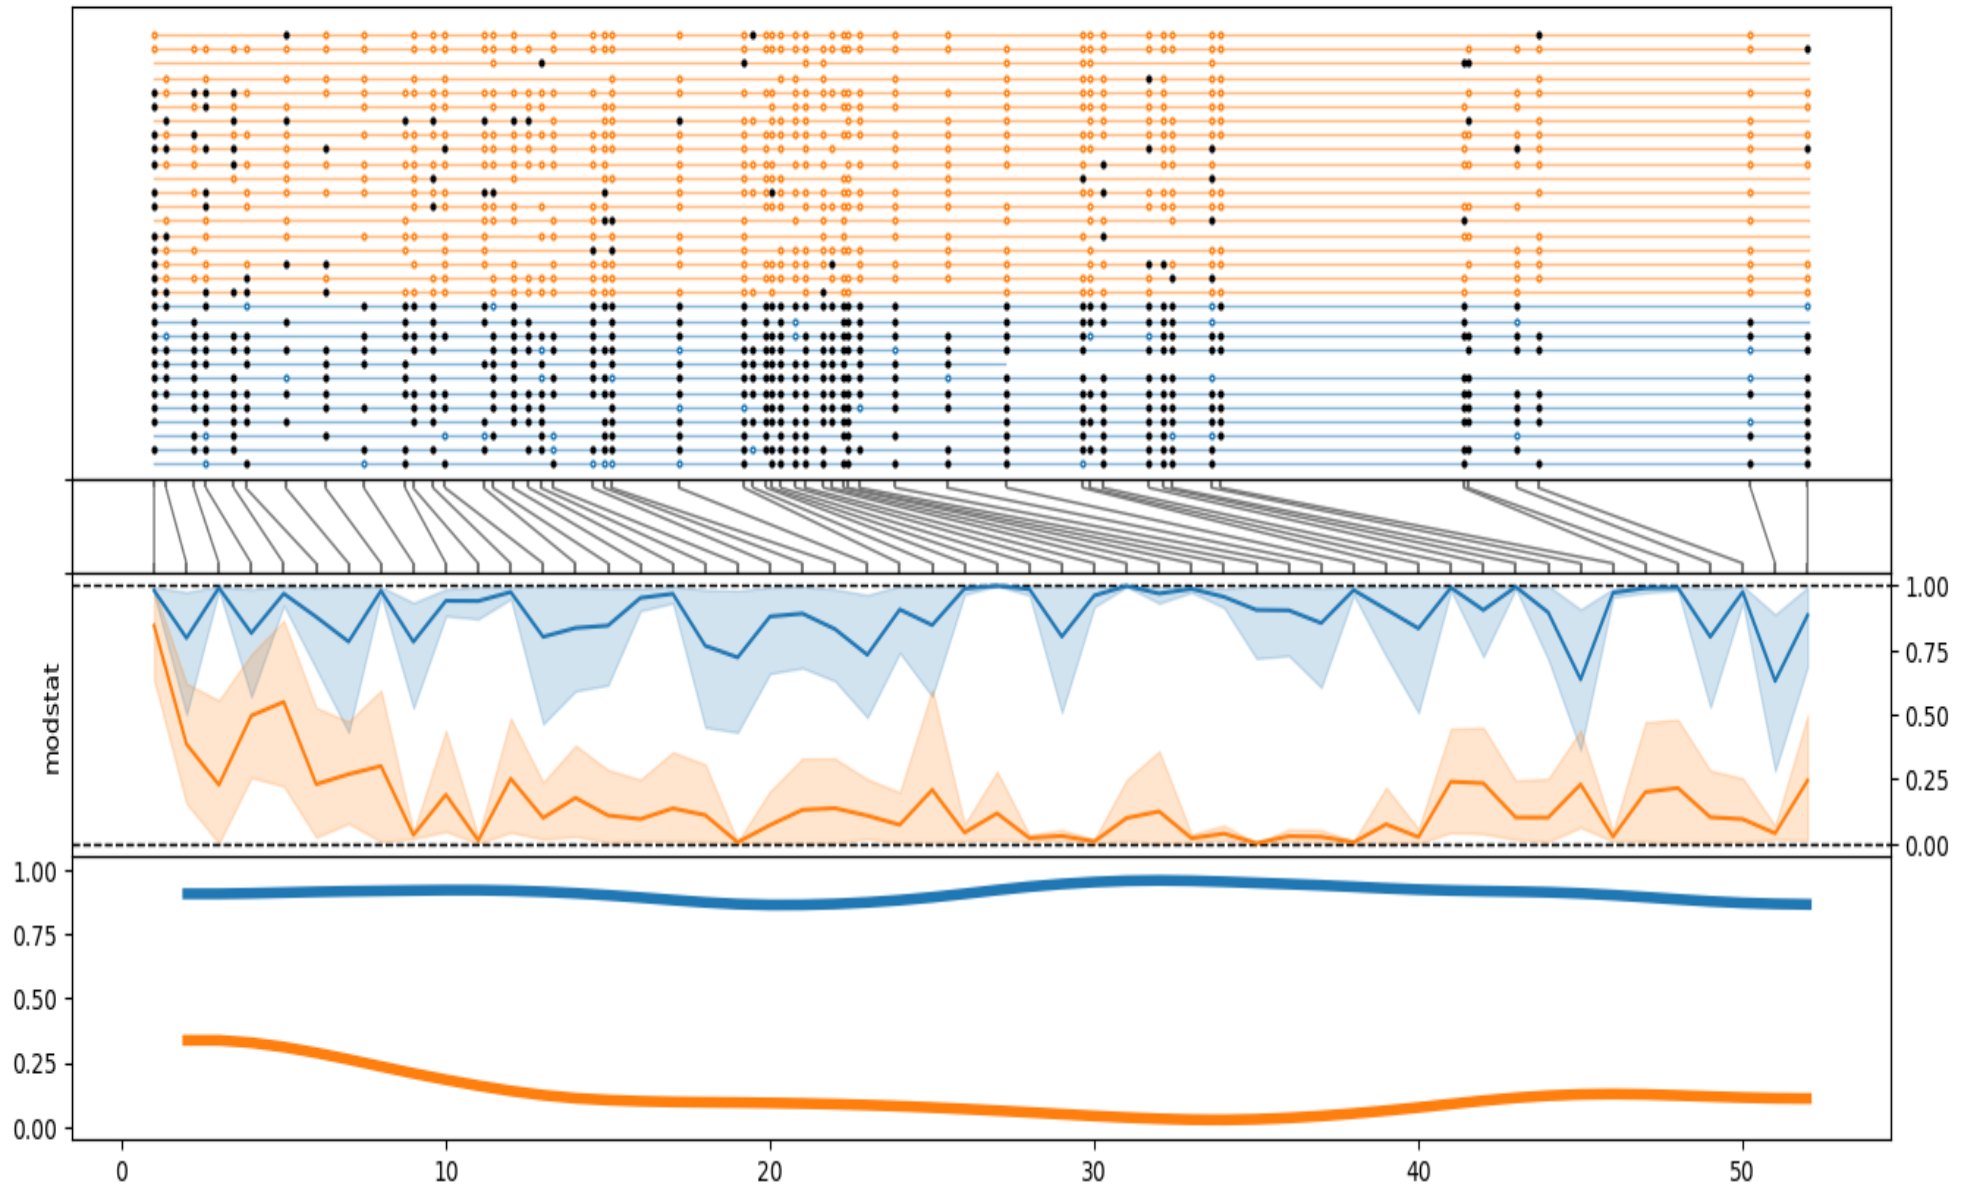

# EPI\_08\_hg38\_phased\_chr15\_24954564\_24956828

chr15:24954657 24954862 24955067 24955272 24955477 24955682 24955887 24956092 24956297 24956502 24956707 24956912

SNRPN>>

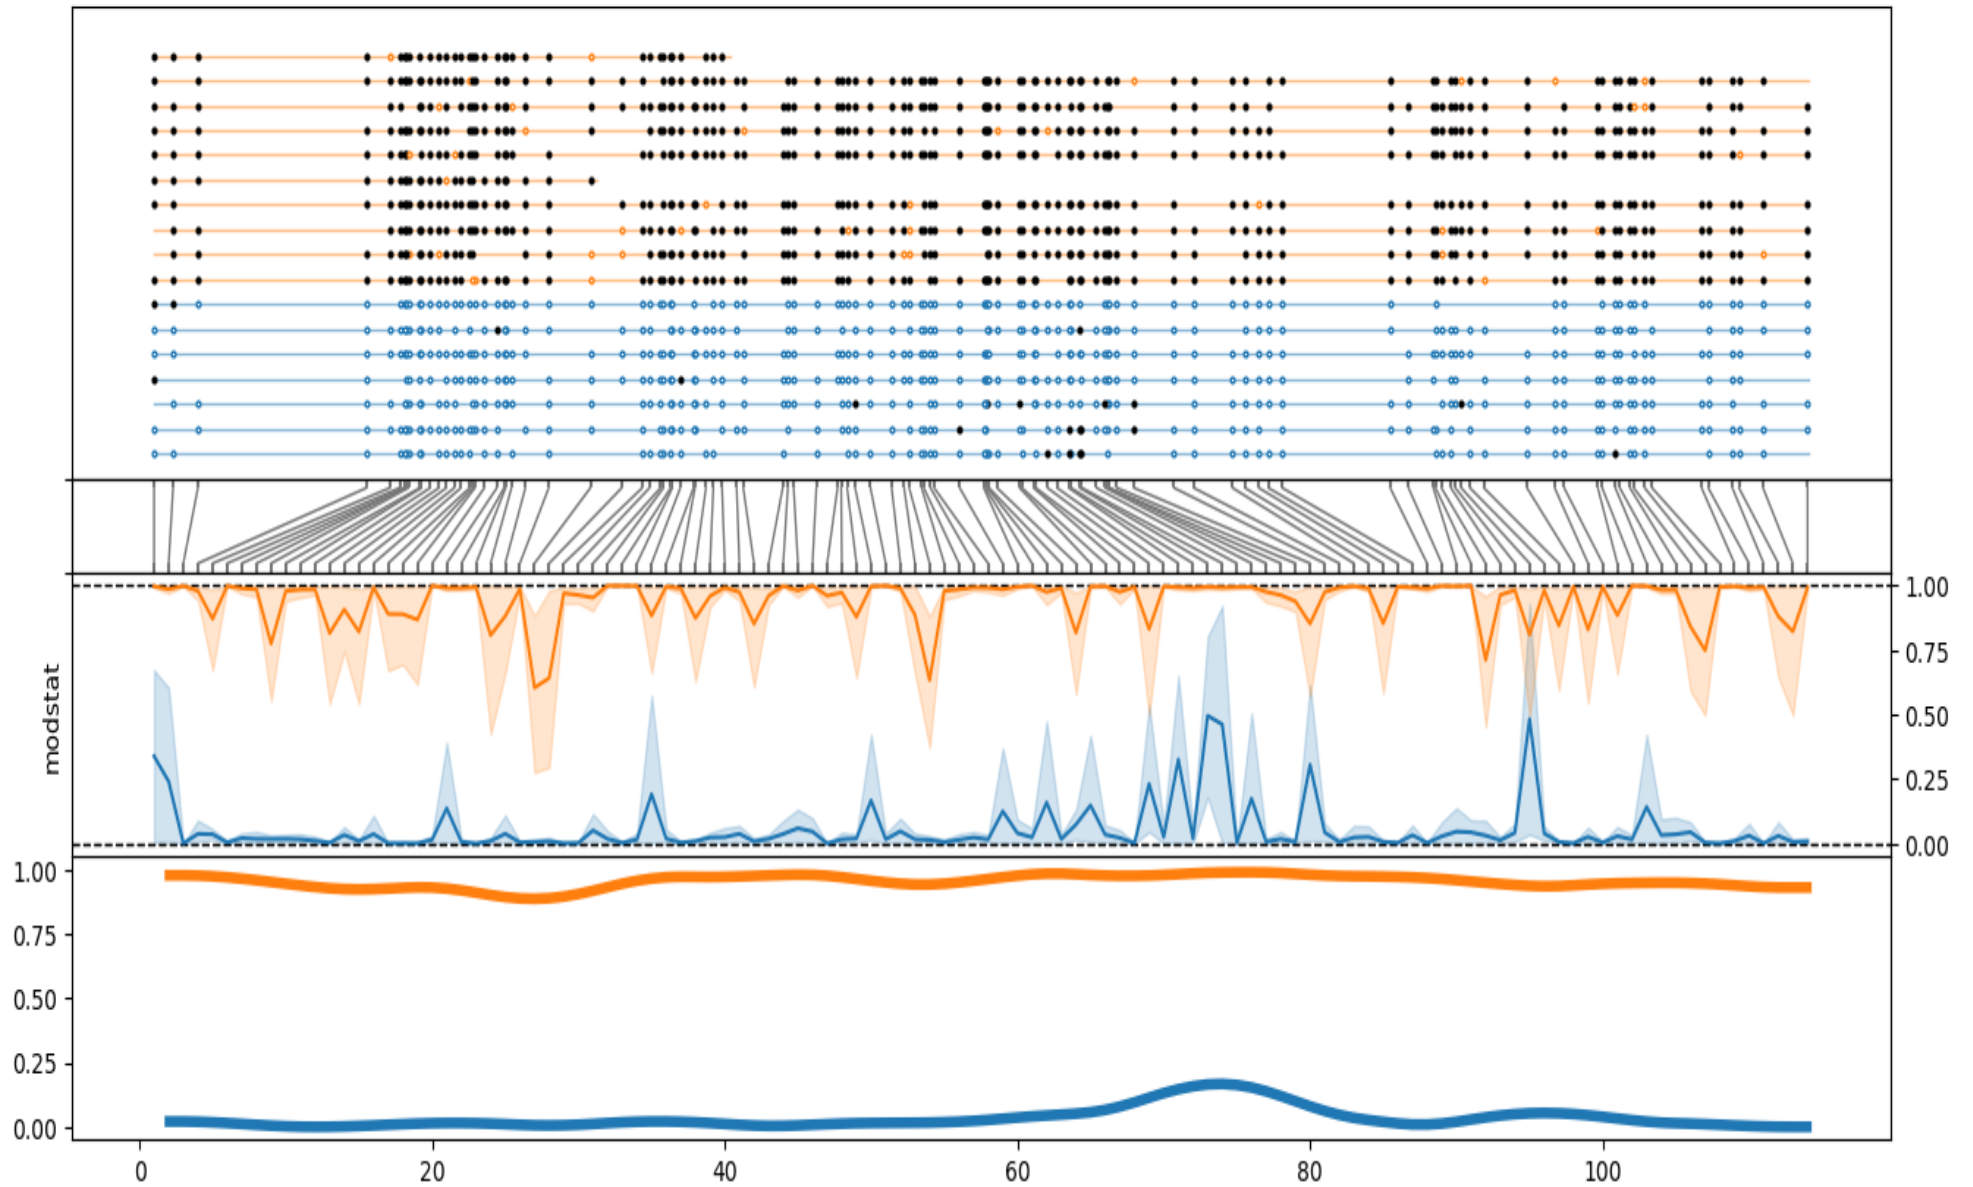

# EPI\_09\_hg38\_phased\_chr11\_1997509\_2003349

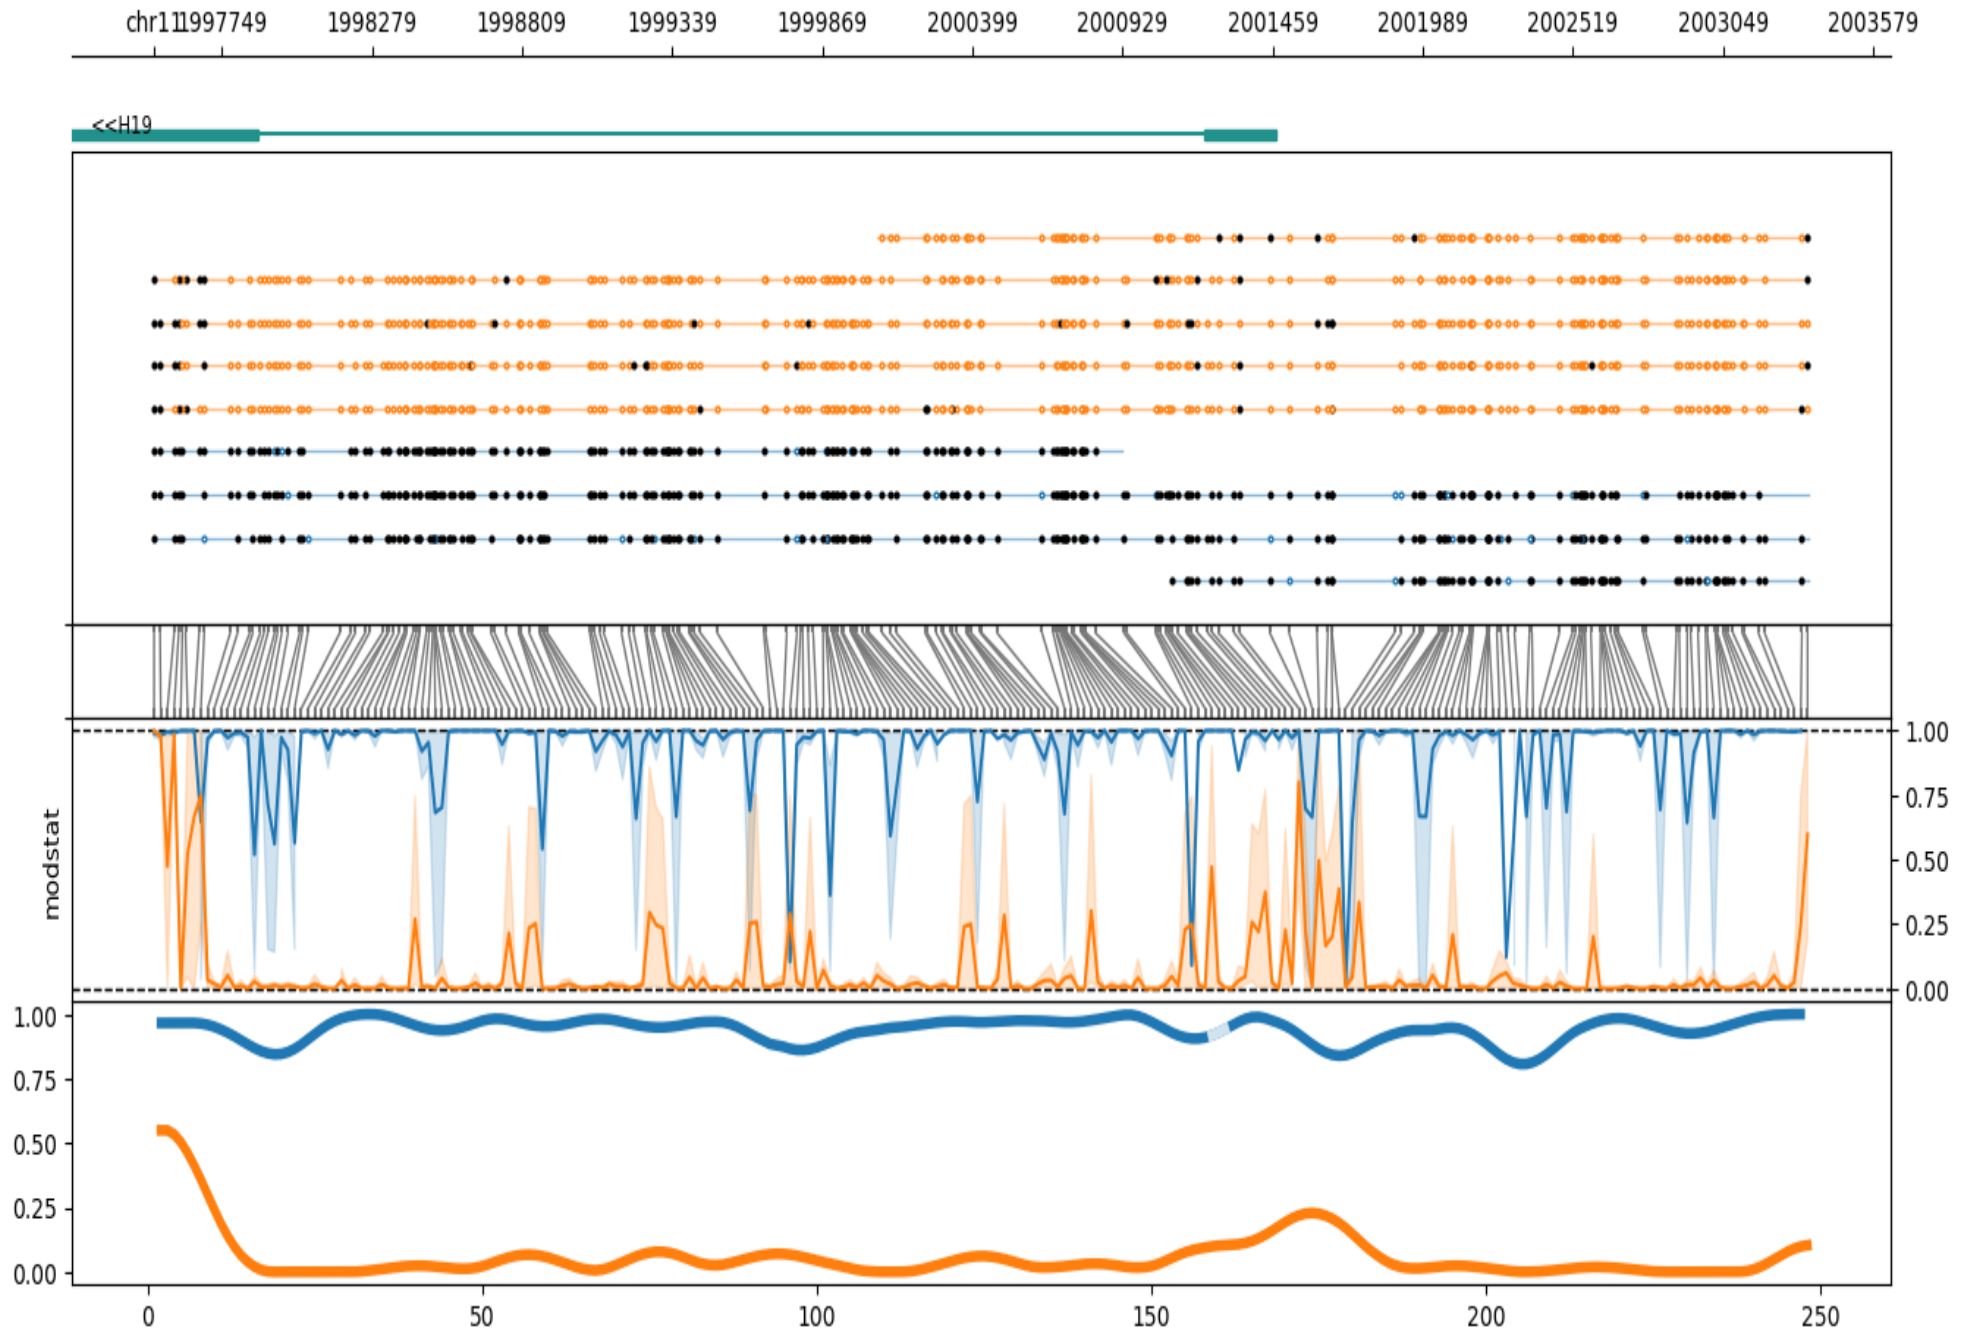

# EPI\_09\_hg38\_phased\_chr11\_2698155\_2701028

chr11 2698274 2698535 2698796 2699057 2699318 2699579 2699840 2700101 2700362 2700623 2700884 2701145

KCNQ1>>

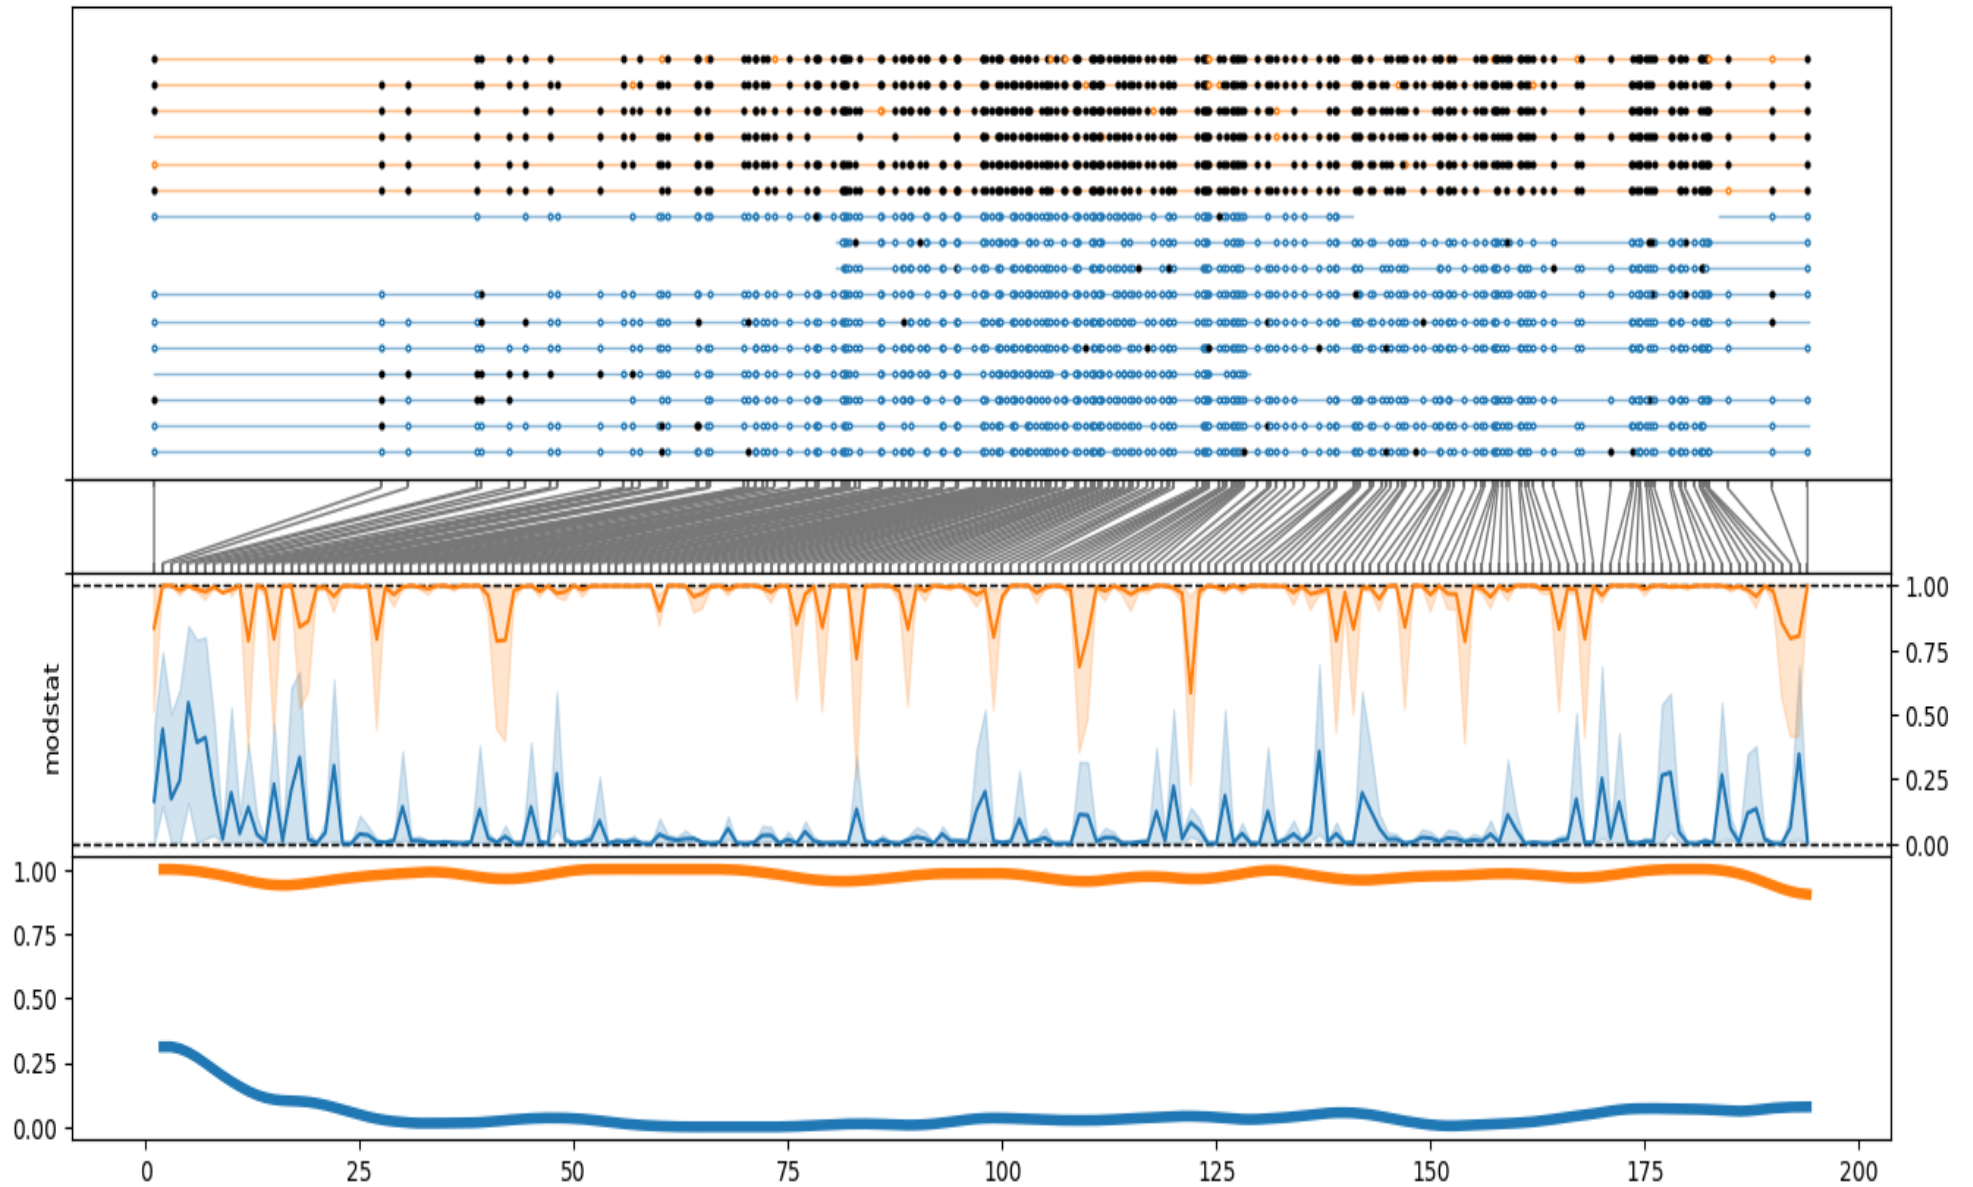



# EPI\_09\_hg38\_phased\_chr14\_100824185\_100827640

chr14 100824328 100824642 100824956 100825270 100825584 100825898 100826212 100826526 100826840 100827154 100827468 100827782

MEG3>>

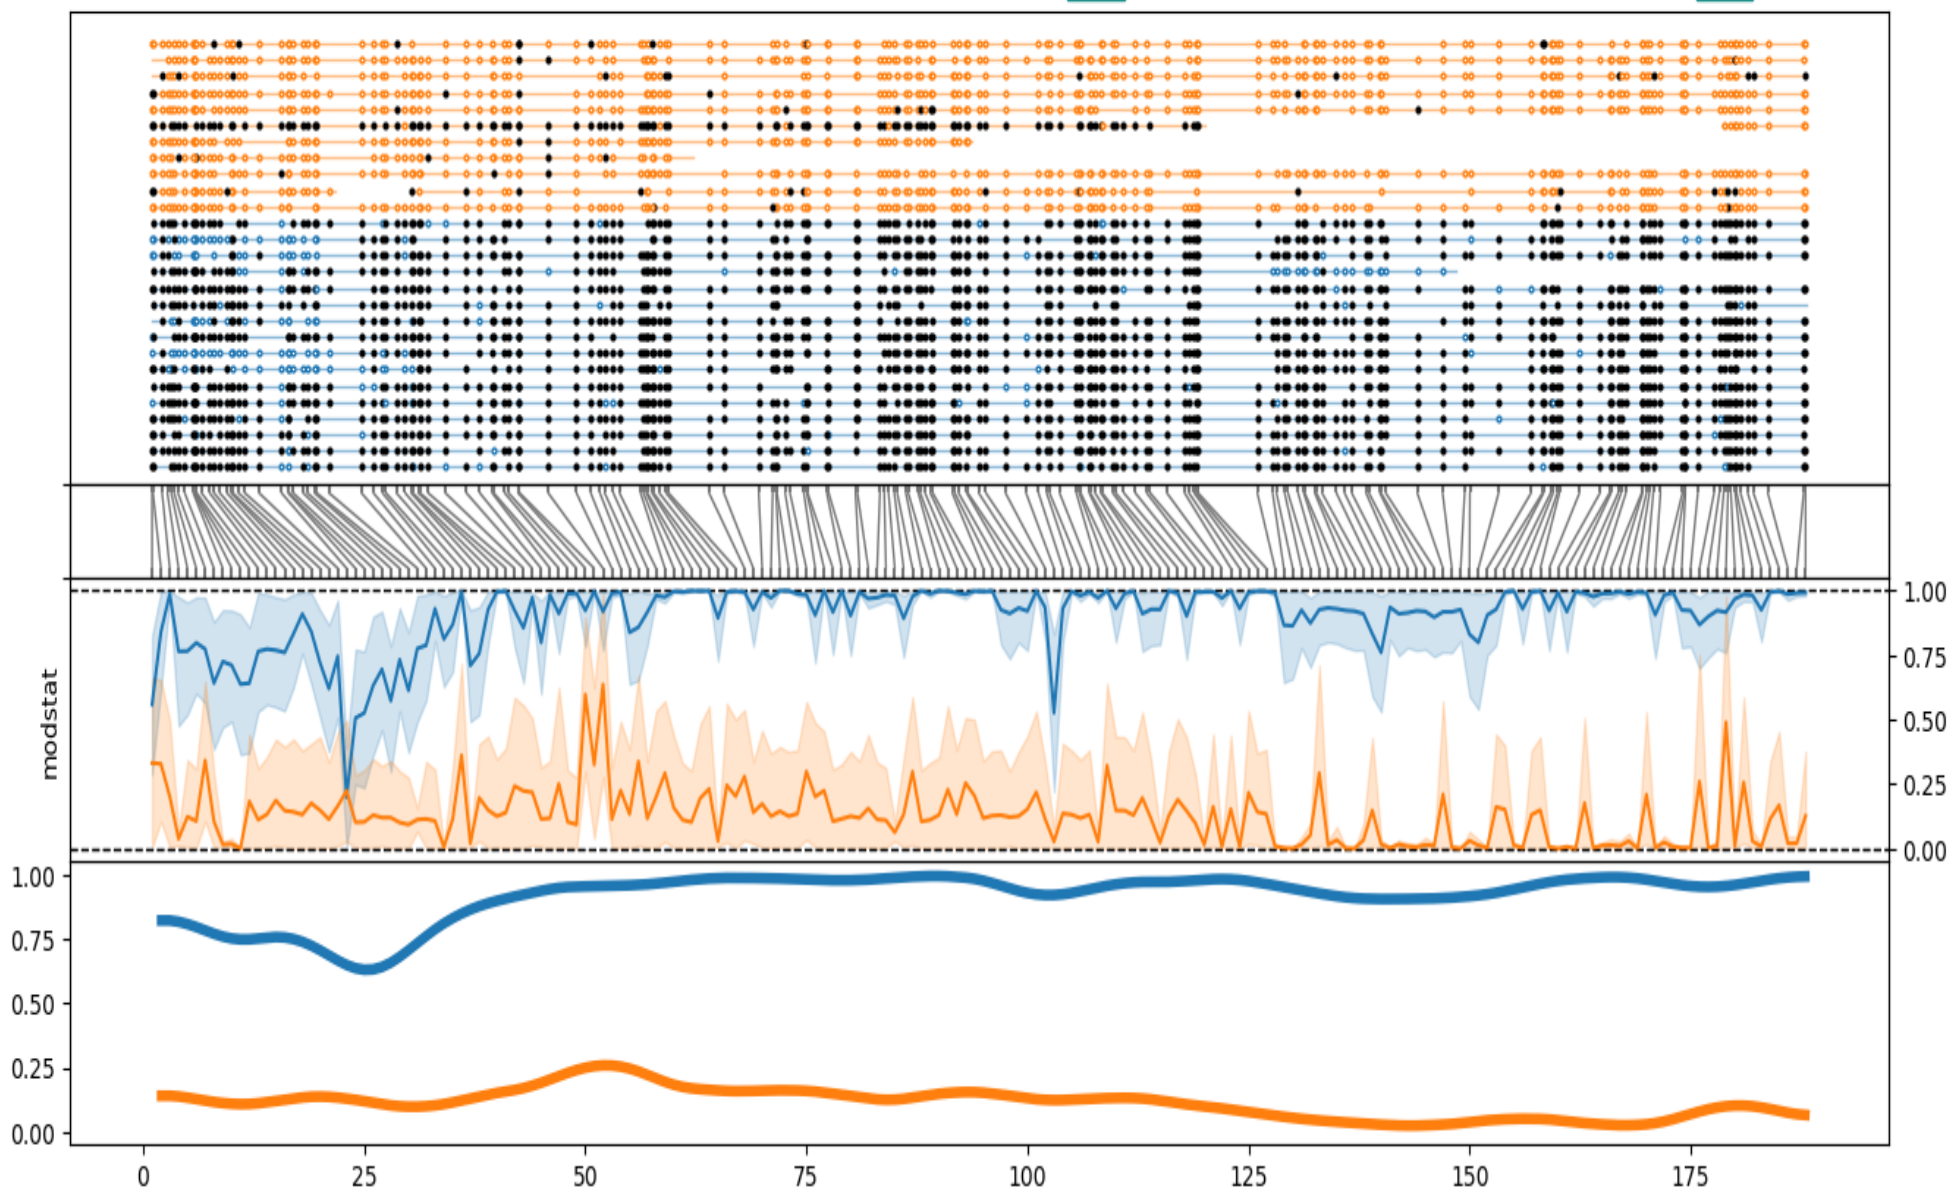

# EPI\_09\_hg38\_phased\_chr14\_100904325\_100905081

chr14 100904356 100904424 100904492 100904560 100904628 100904696 100904764 100904832 100904900 100904968 100905036 100905104

MEG8>>

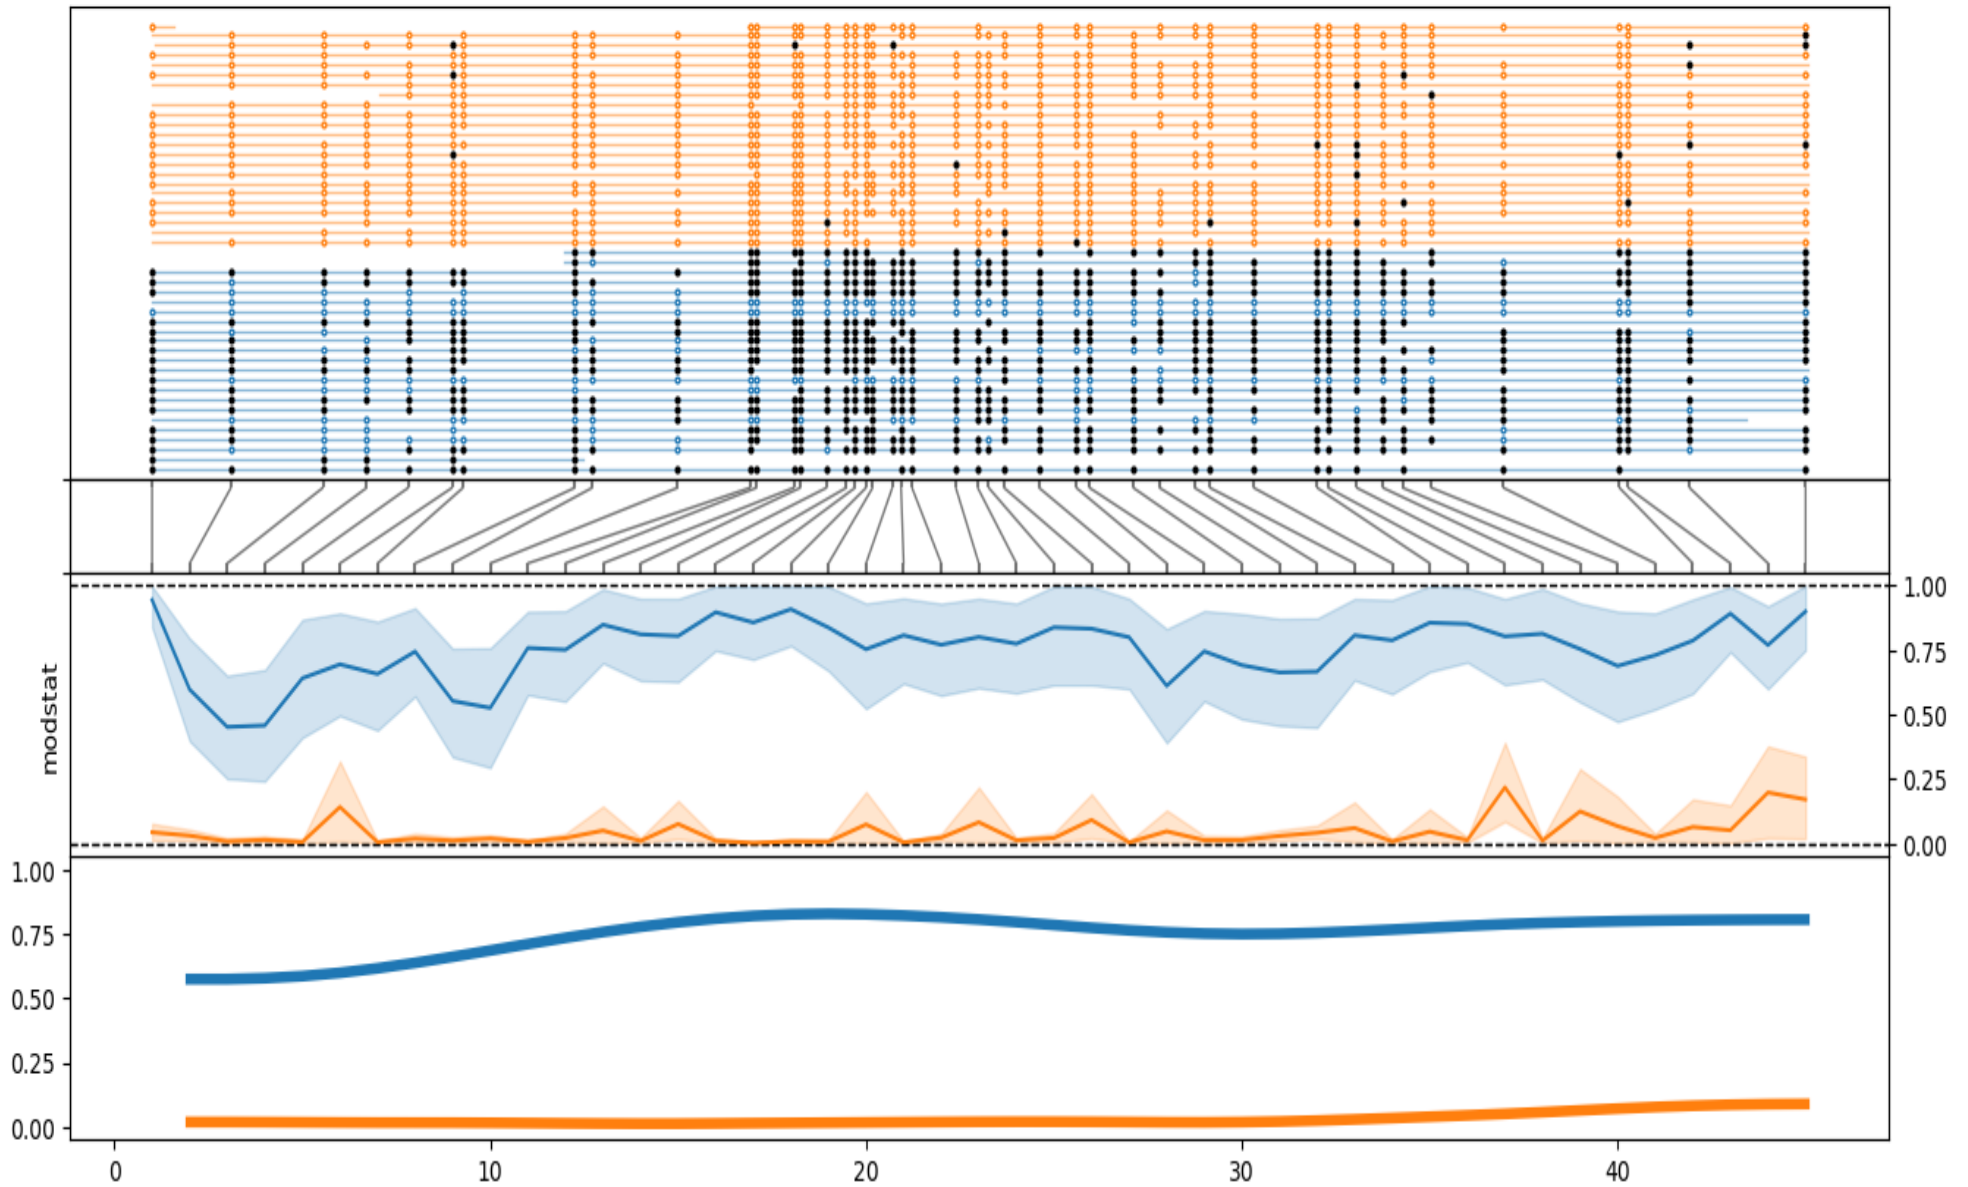

# EPI\_09\_hg38\_phased\_chr15\_23647178\_23648424

chr15:23647229 23647342 23647455 23647568 23647681 23647794 23647907 23648020 23648133 23648246 23648359 23648472

<<MAGEL2

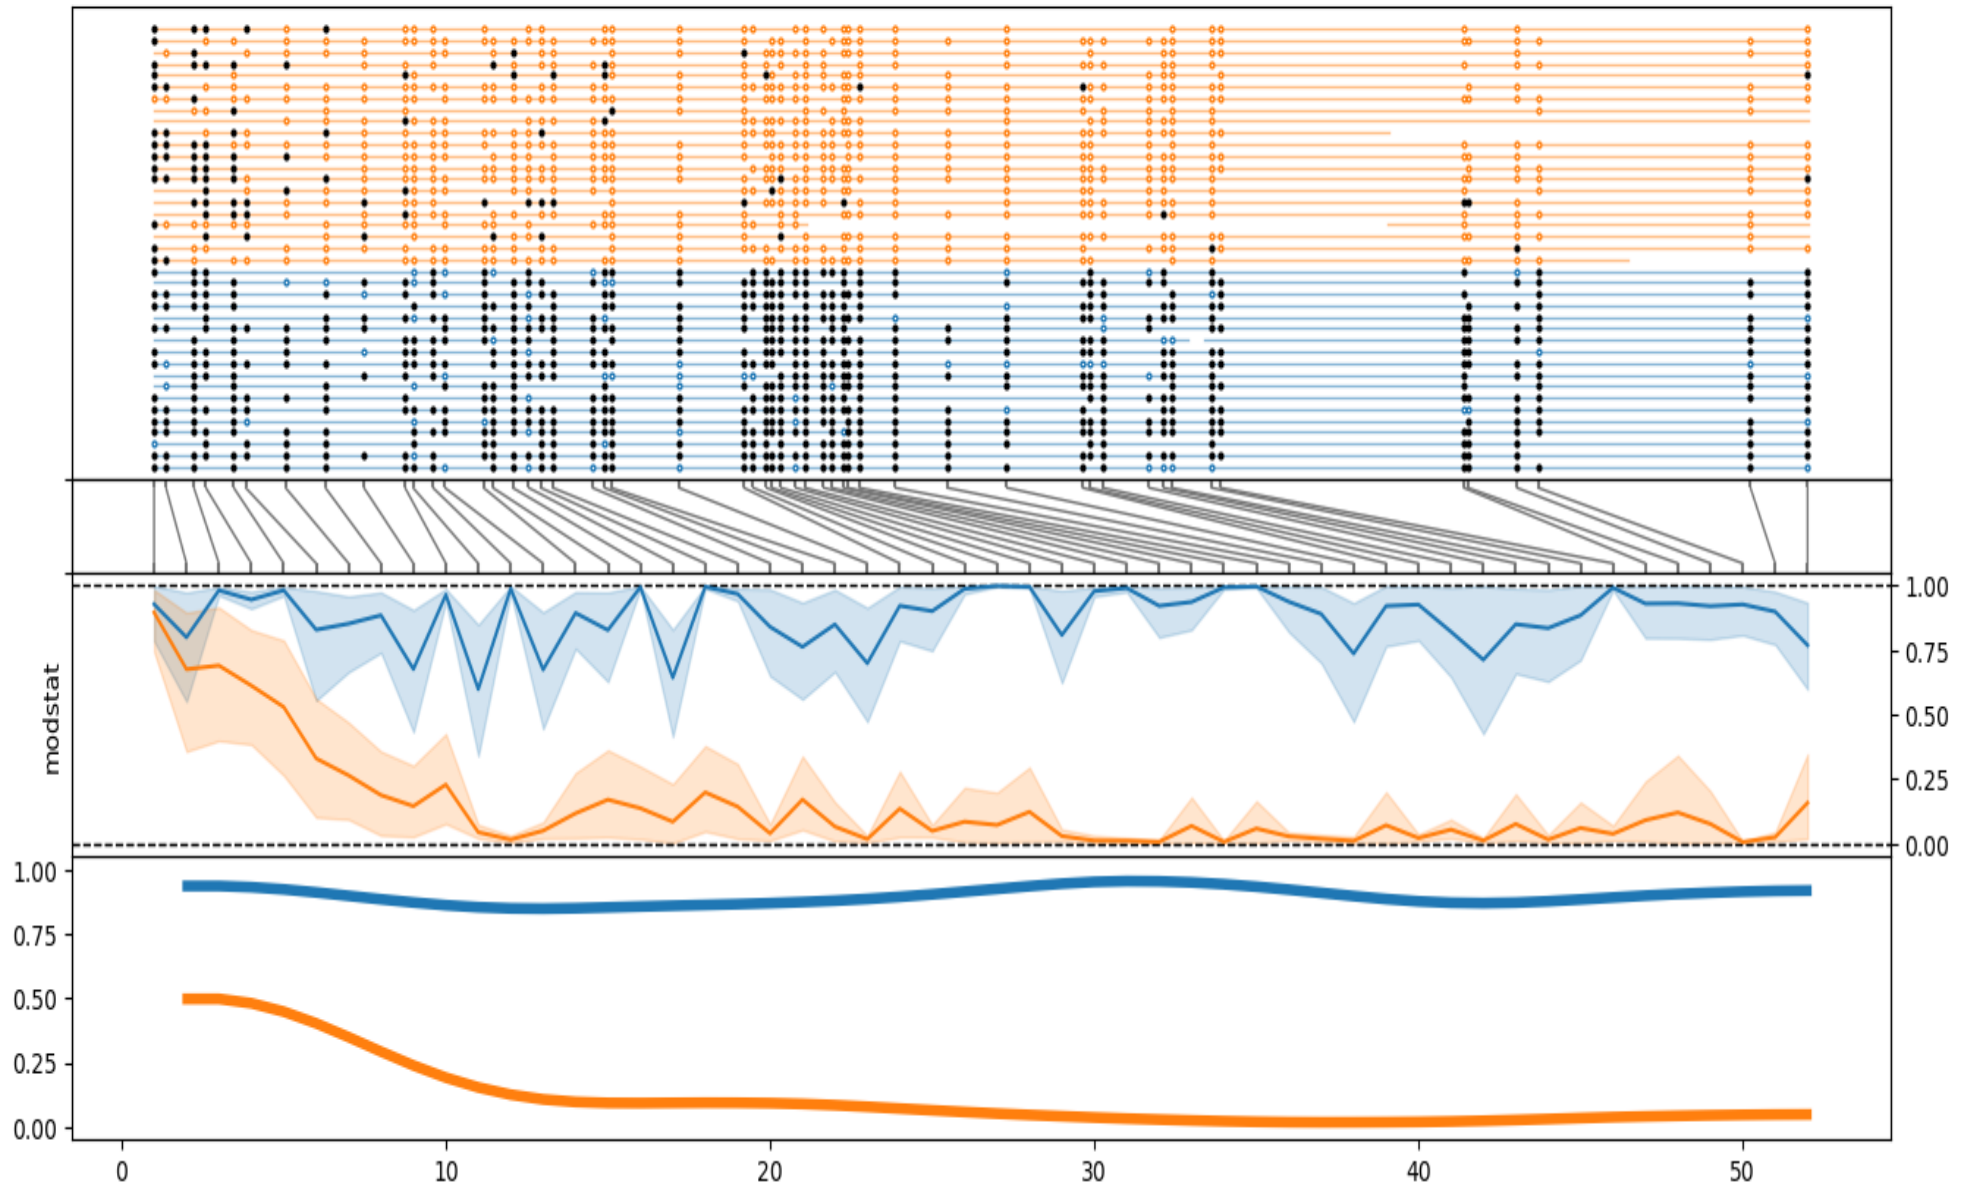

# EPI\_09\_hg38\_phased\_chrom15\_24954564\_24956828

chr15:24954564-24956828

SNRPN>>

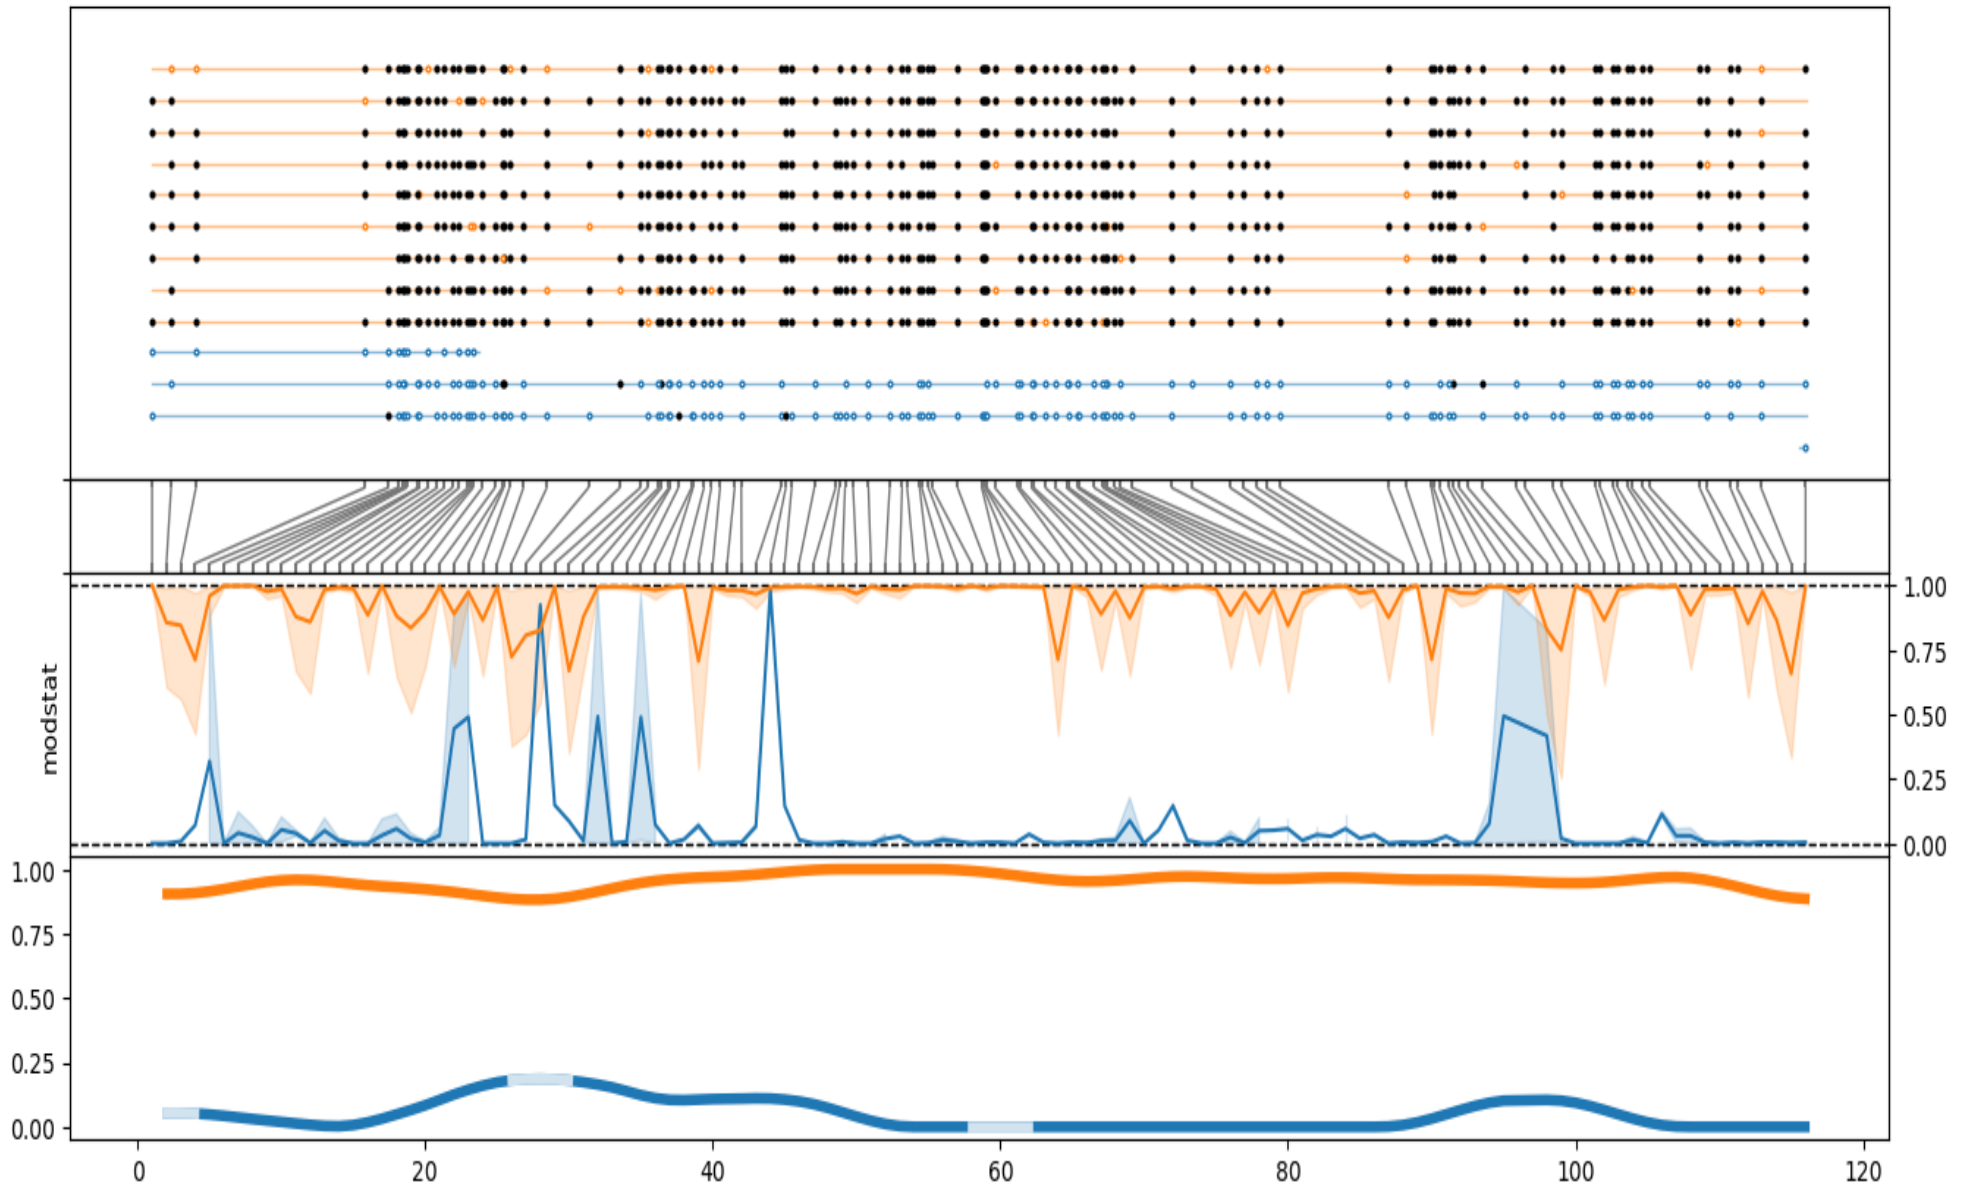



# EPI\_10\_hg38\_phased\_chr11\_1997509\_2003349

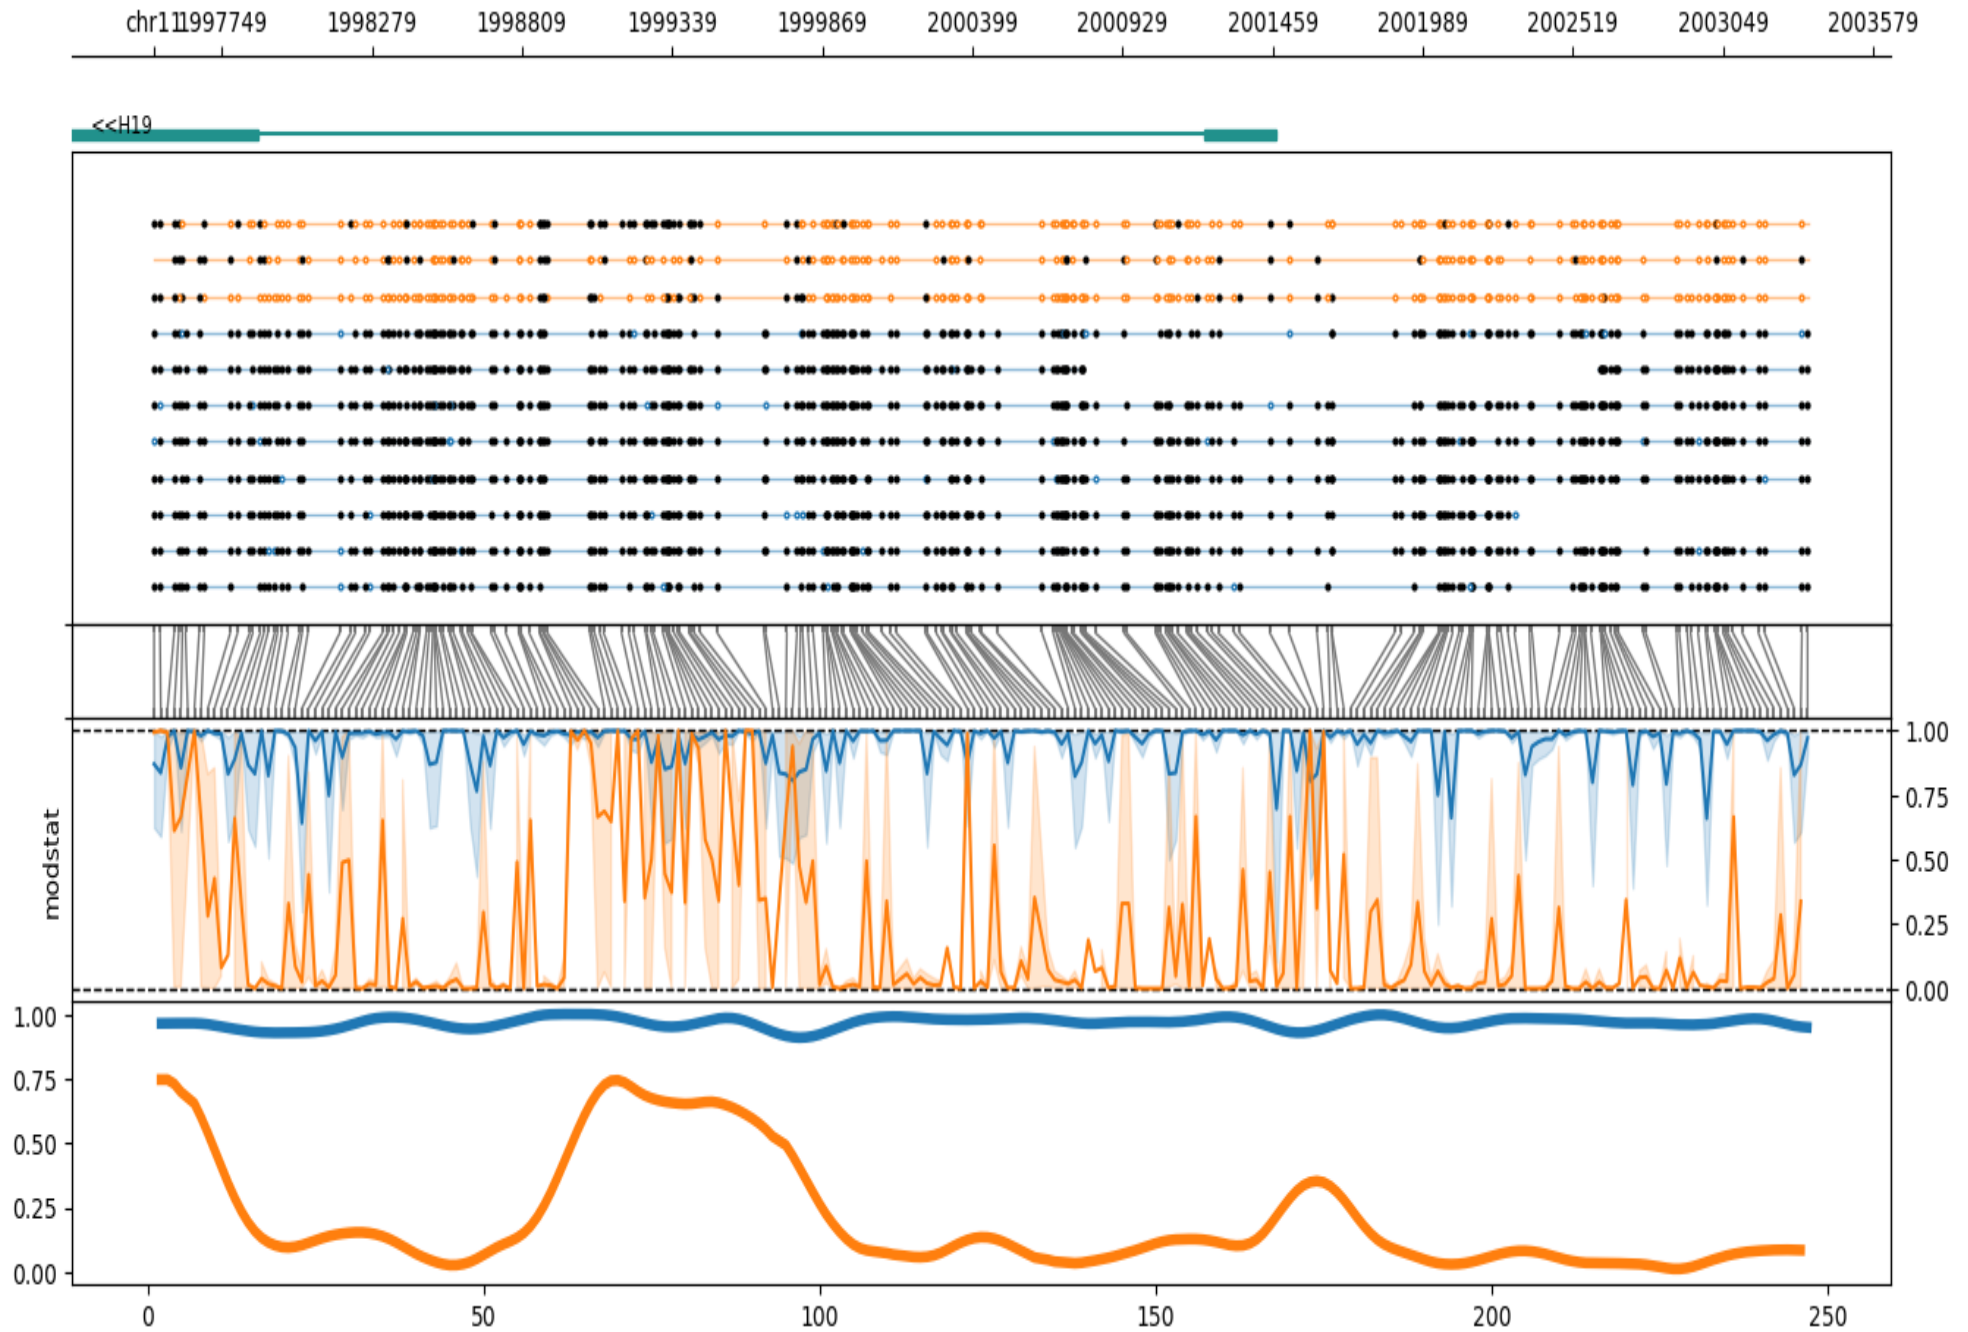

# EPI\_10\_hg38\_phased\_chr11\_2698155\_2701028

chr11 2698274 2698535 2698796 2699057 2699318 2699579 2699840 2700101 2700362 2700623 2700884 2701145

KCNQ1>>

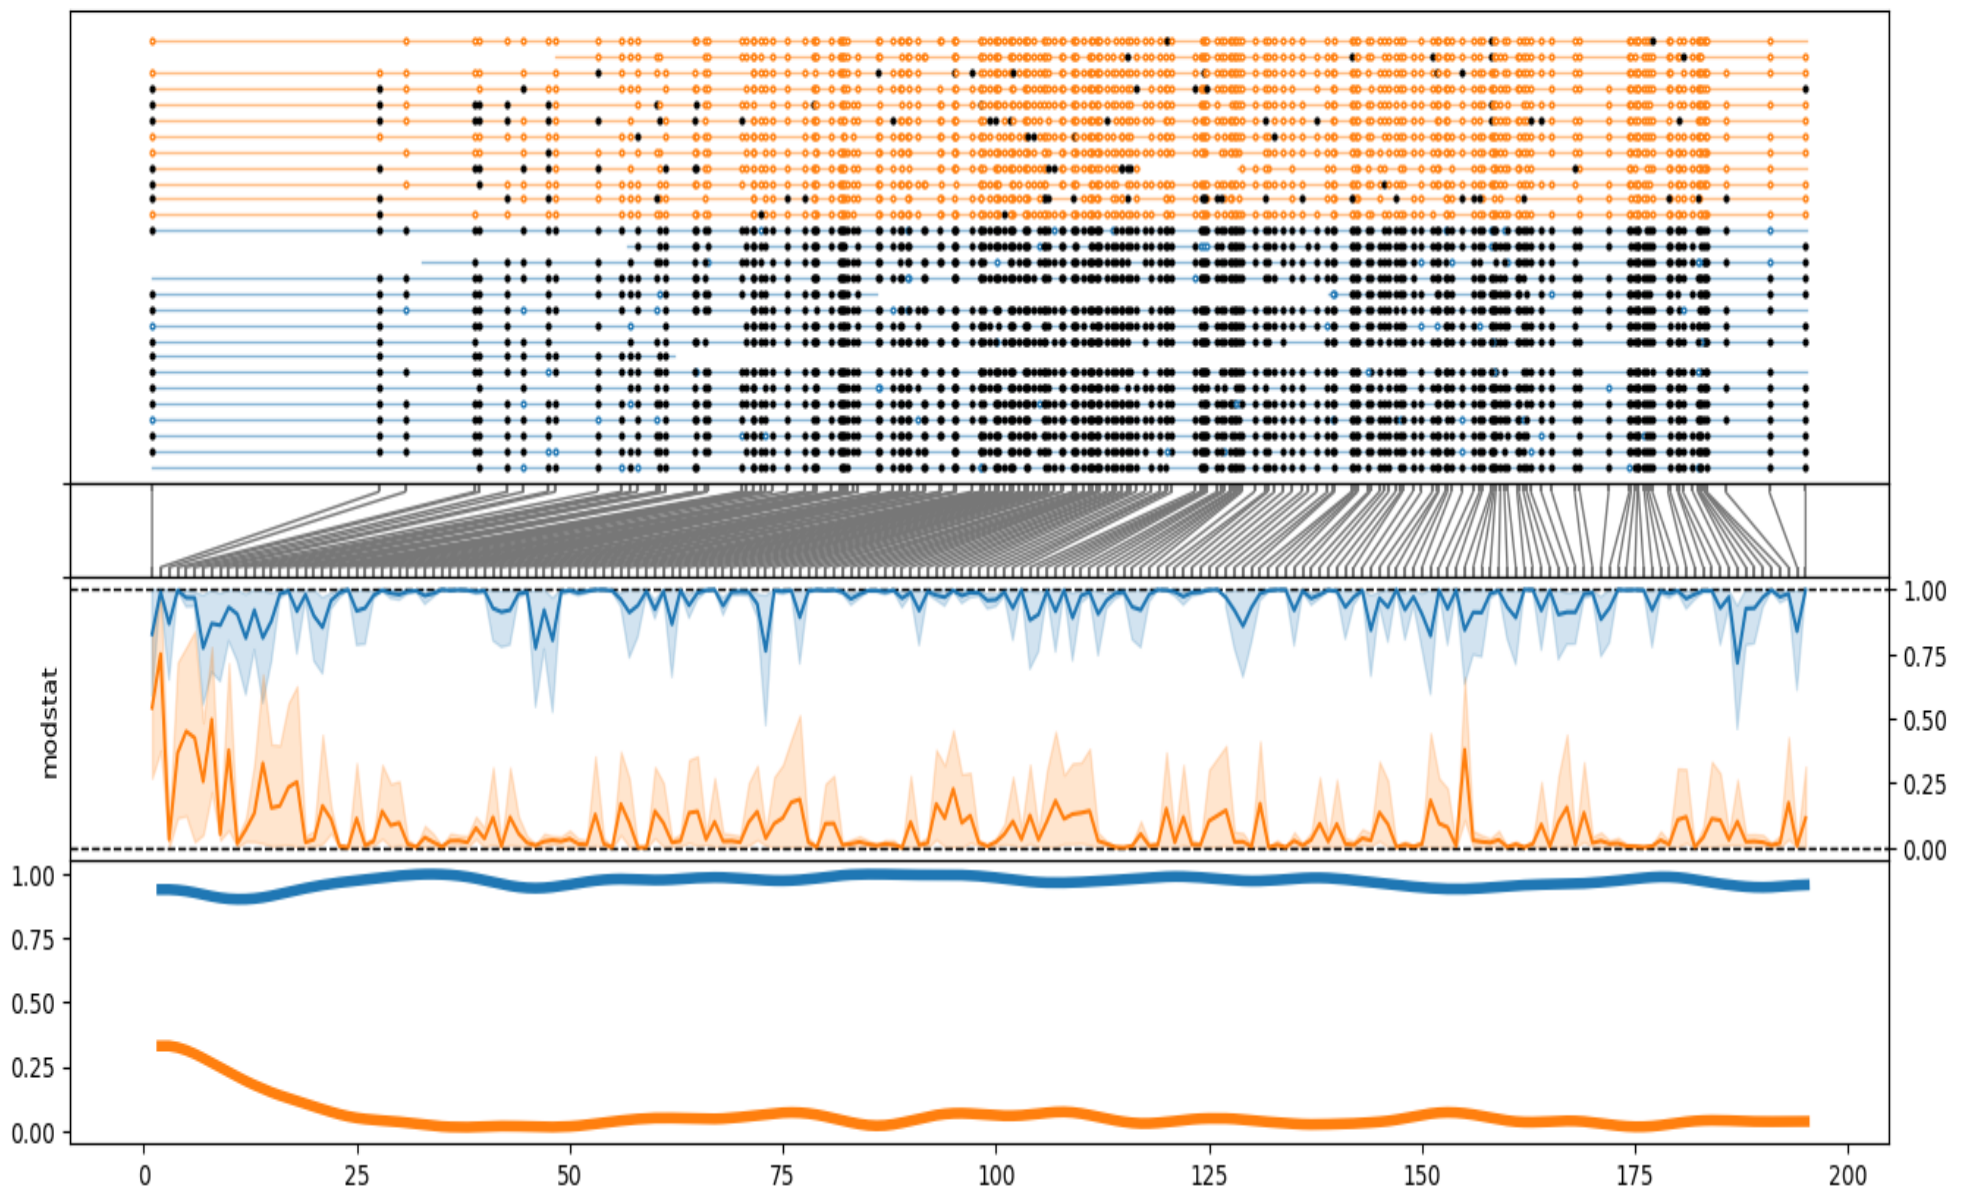

# EPI\_10\_hg38\_phased\_chr14\_100824185\_100827640

chr14 100824328 100824642 100824956 100825270 100825584 100825898 100826212 100826526 100826840 100827154 100827468 100827782

MEG3>>

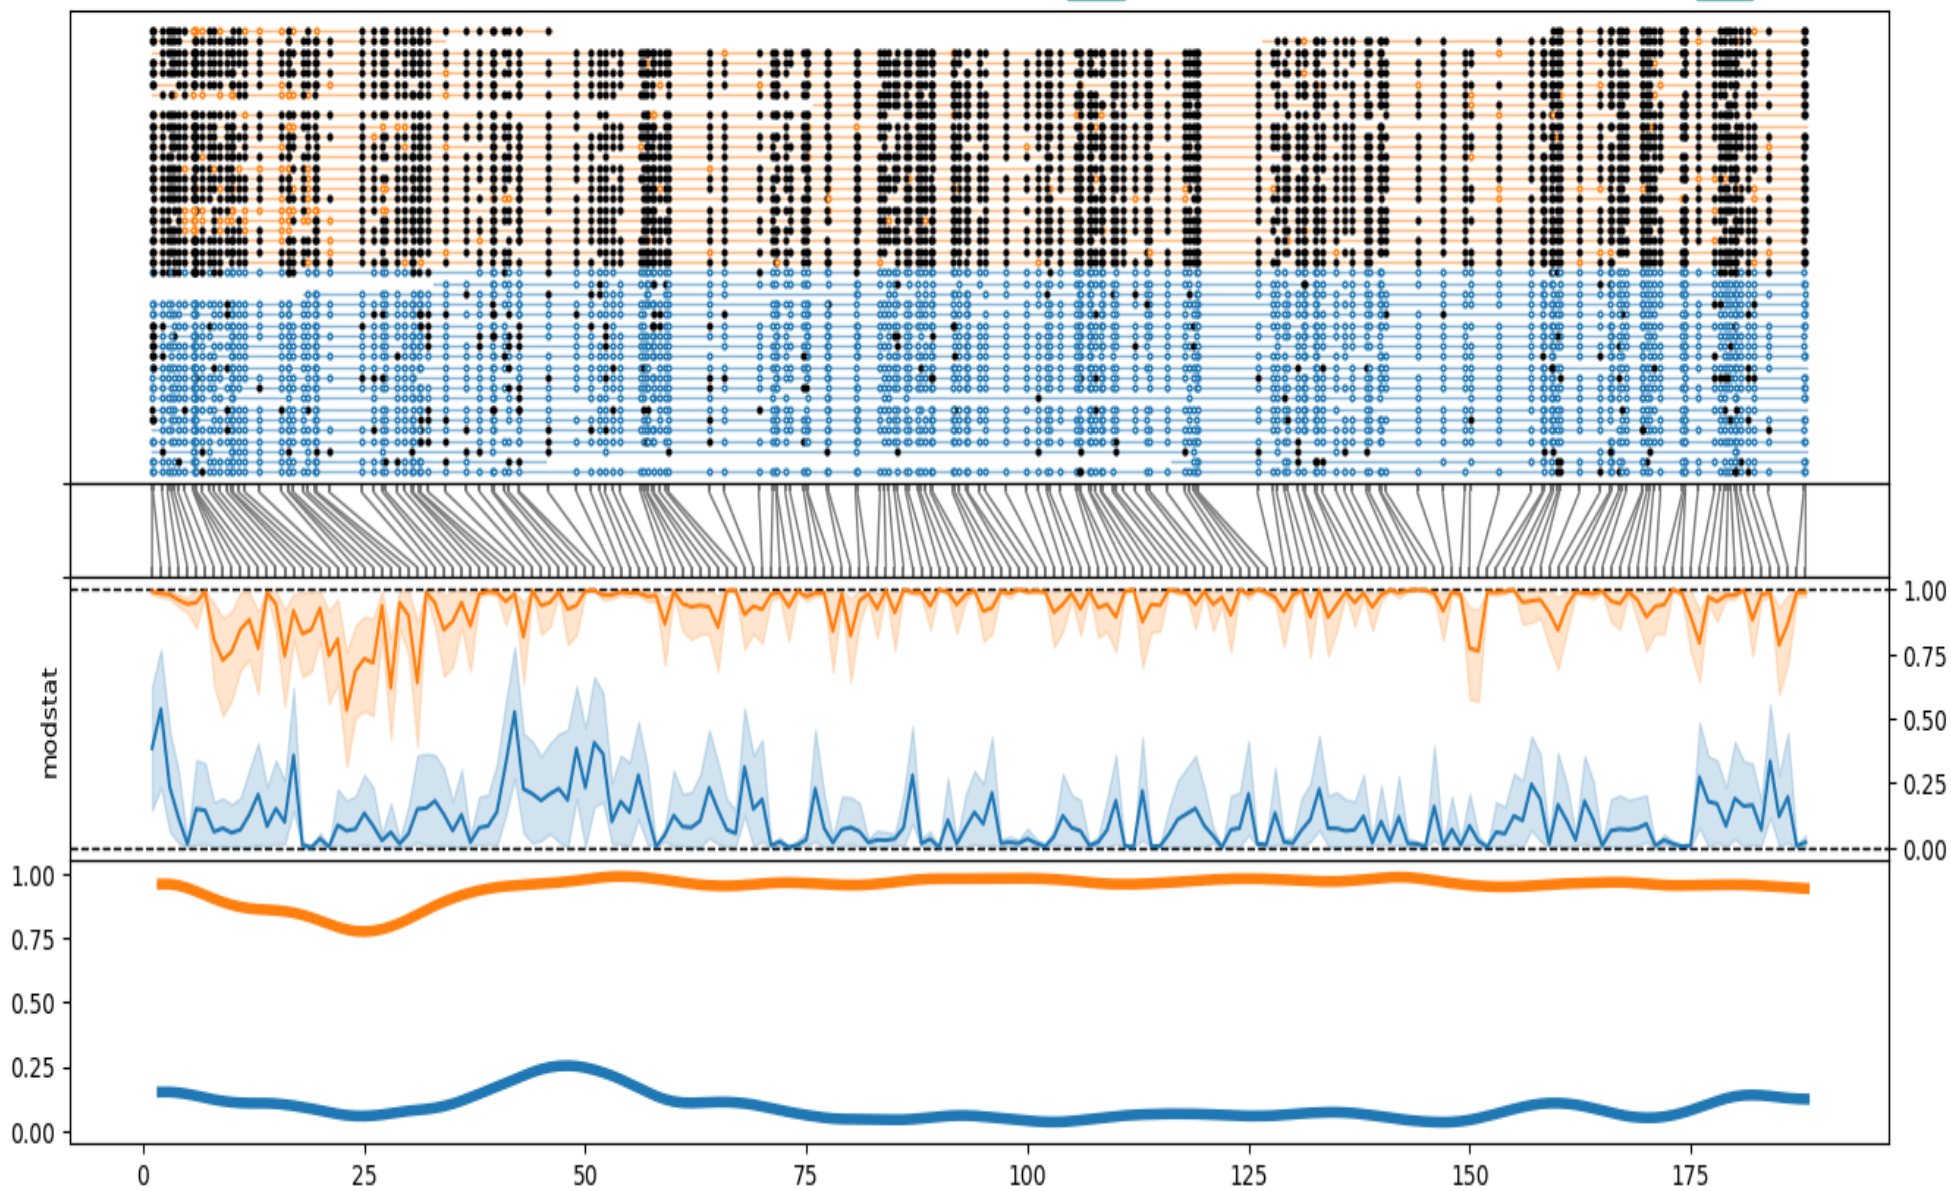

# EPI\_10\_hg38\_phased\_chr14\_100904325\_100905081

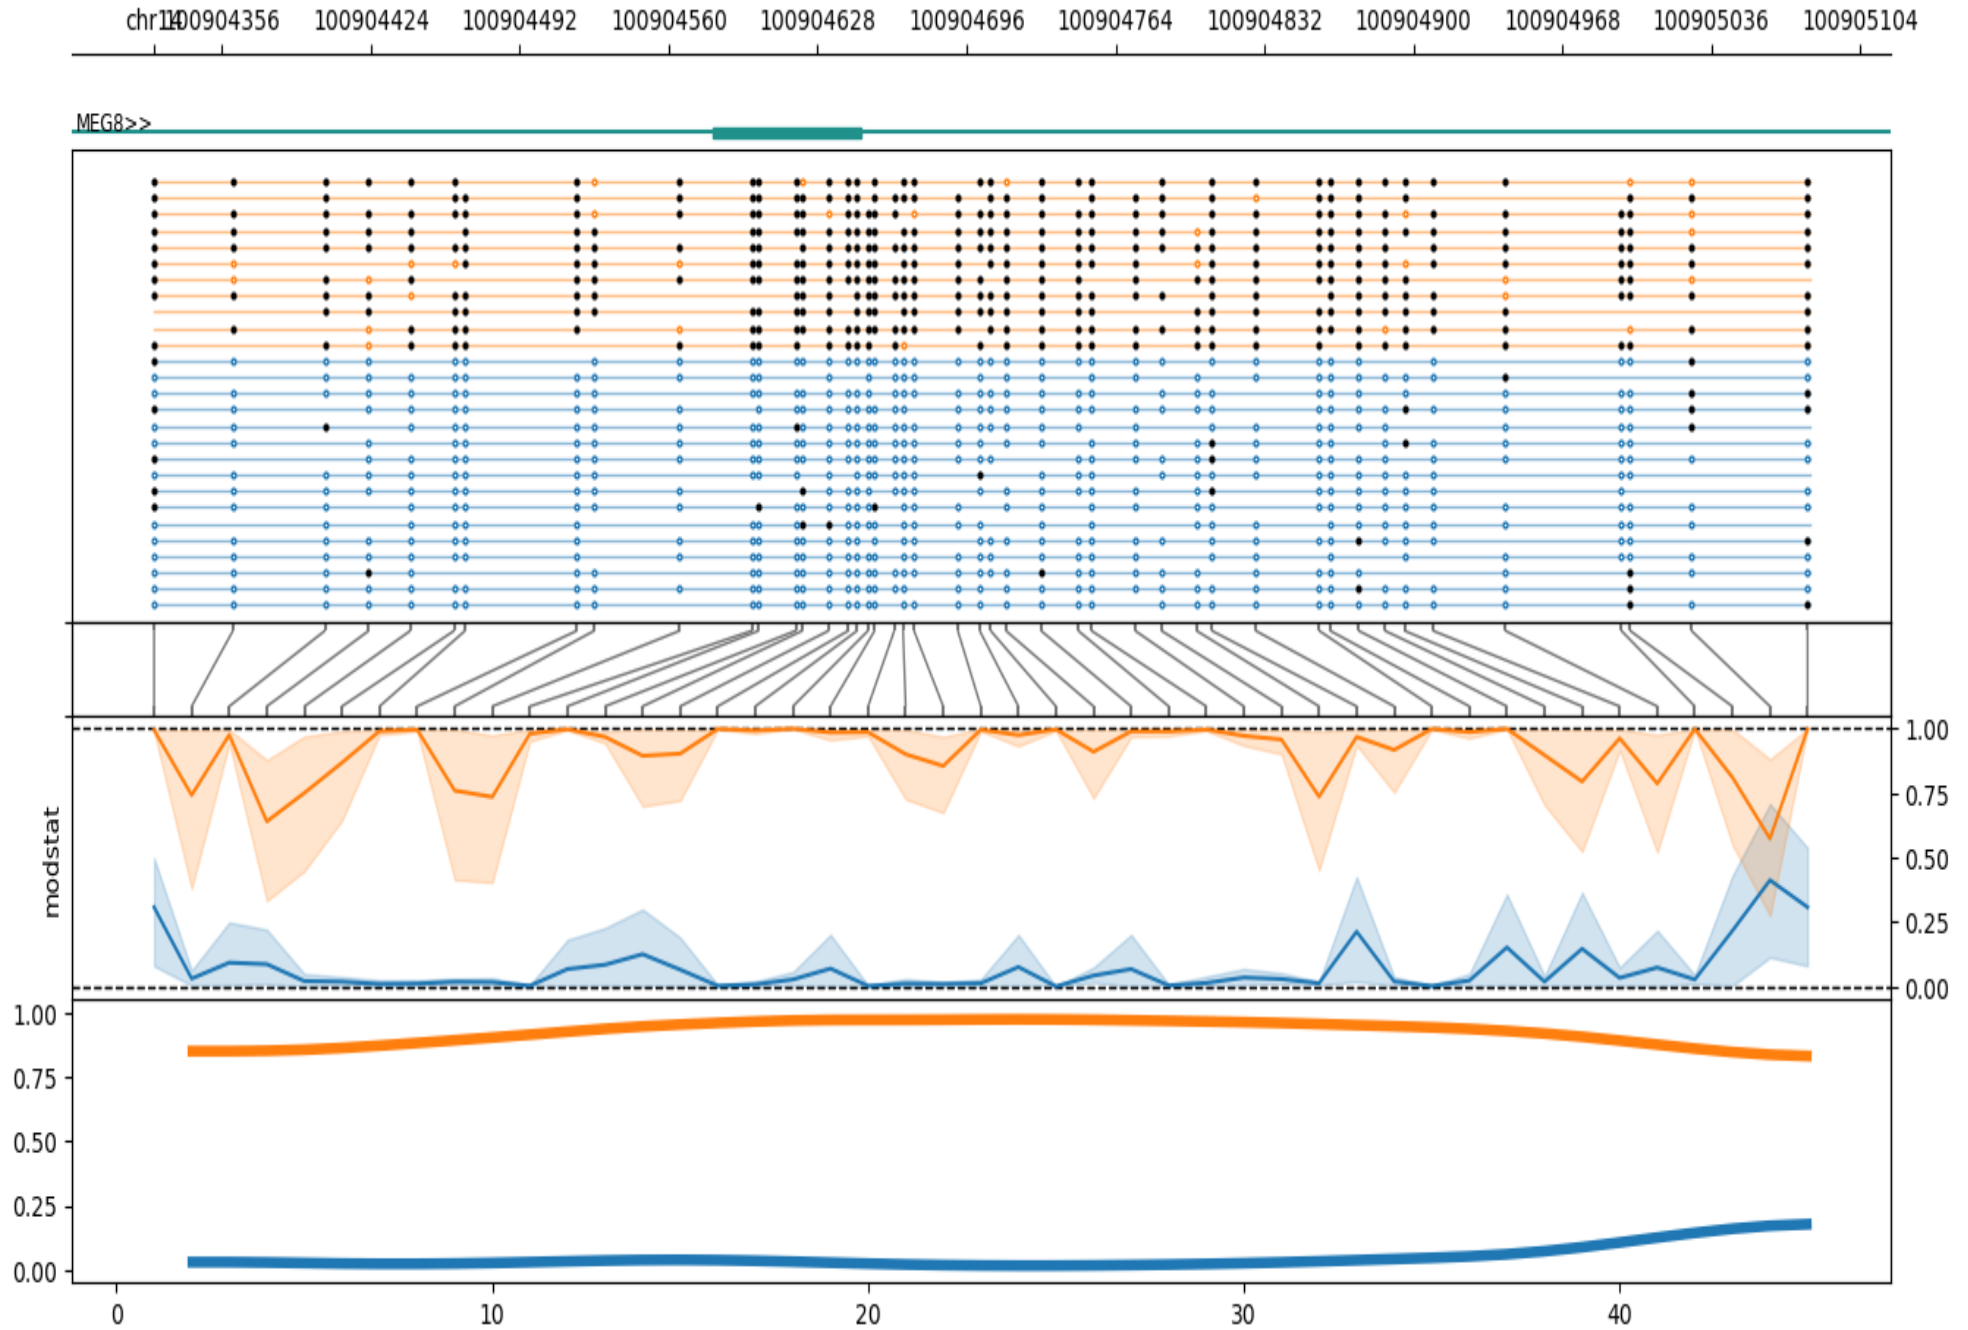



# EPI\_10\_hg38\_phased\_chr15\_23647178\_23648424

chr15:23647229 23647342 23647455 23647568 23647681 23647794 23647907 23648020 23648133 23648246 23648359 23648472

<<MAGEL2

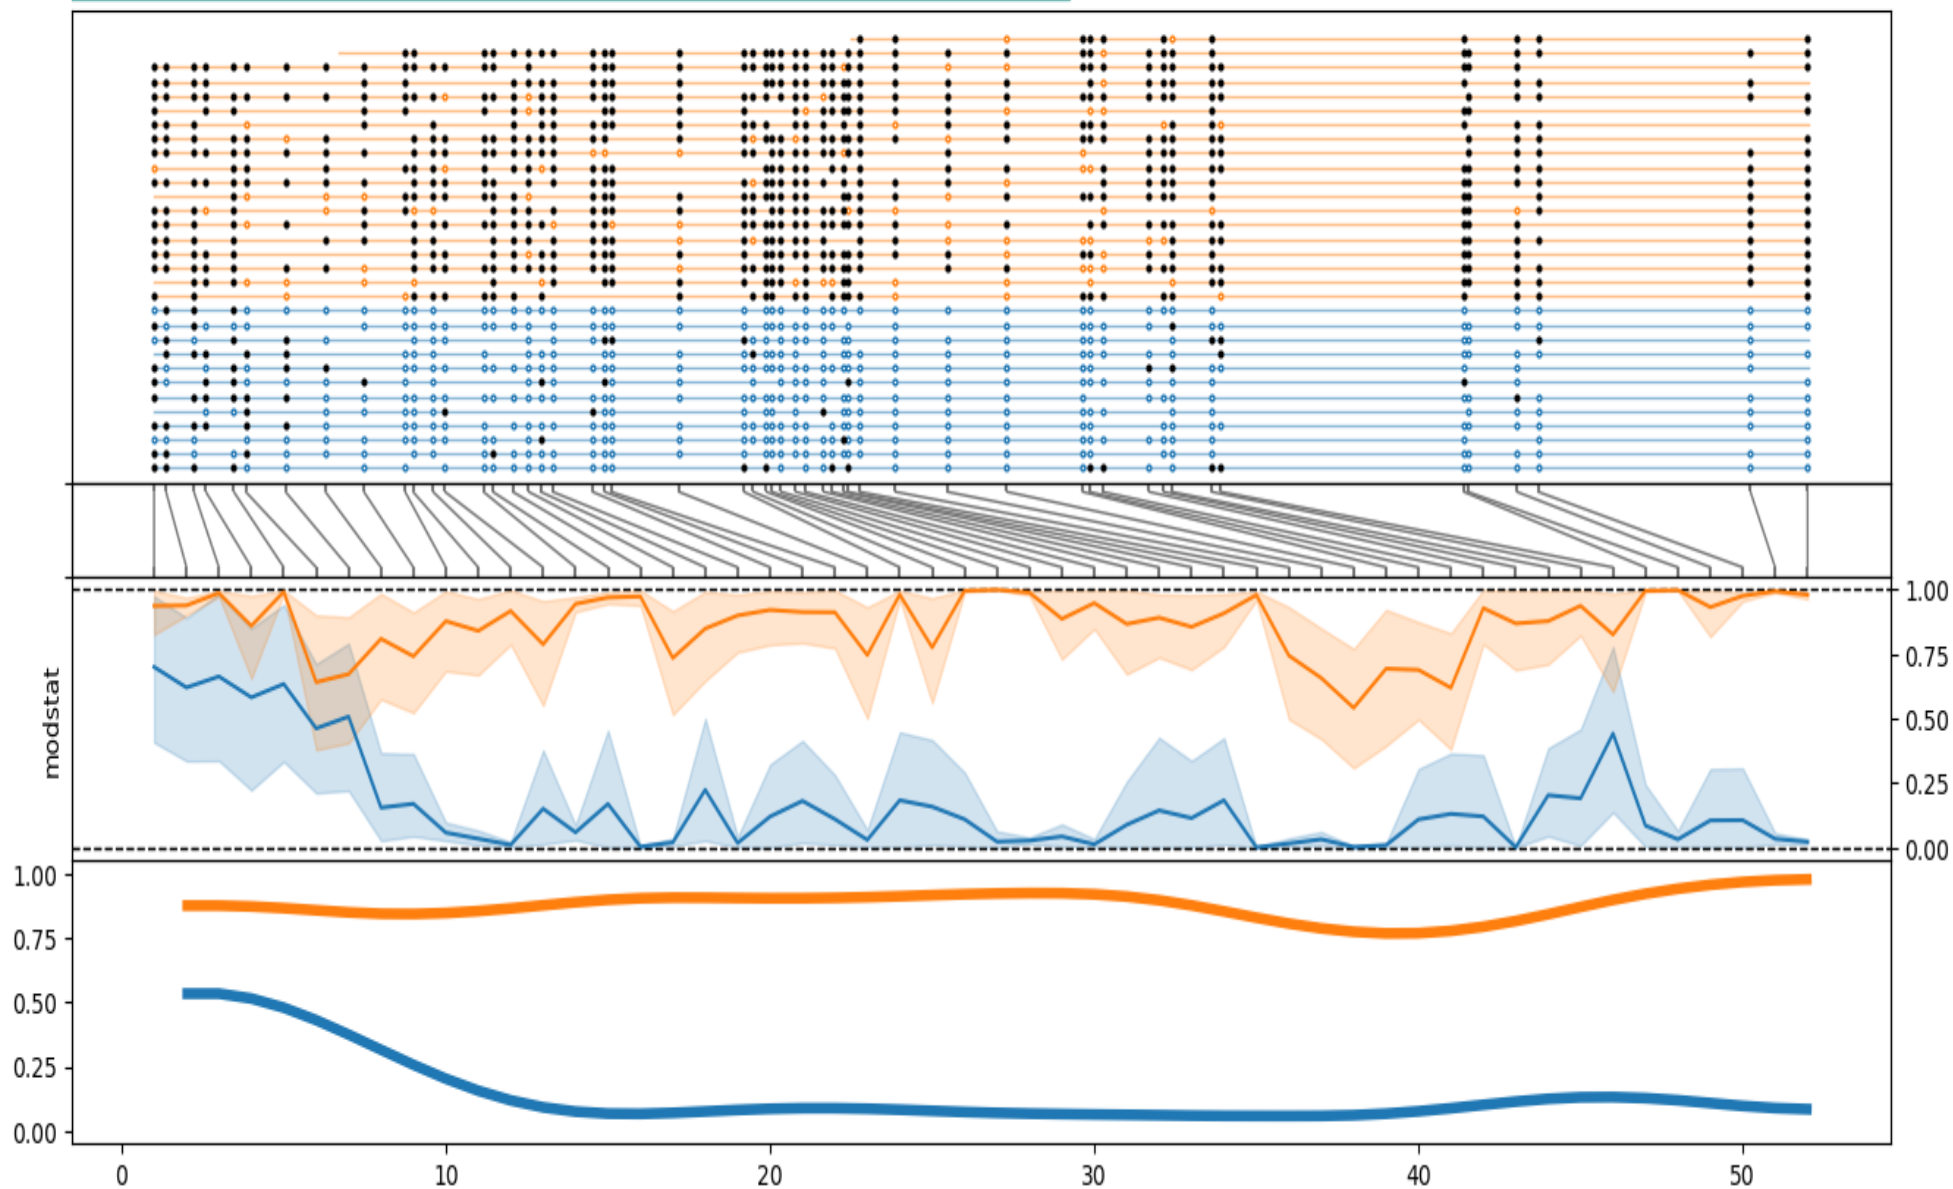

# EPI\_10\_hg38\_phased\_chromosome15\_24954564\_24956828

chr15 24954657 24954862 24955067 24955272 24955477 24955682 24955887 24956092 24956297 24956502 24956707 24956912

SNRPN>>

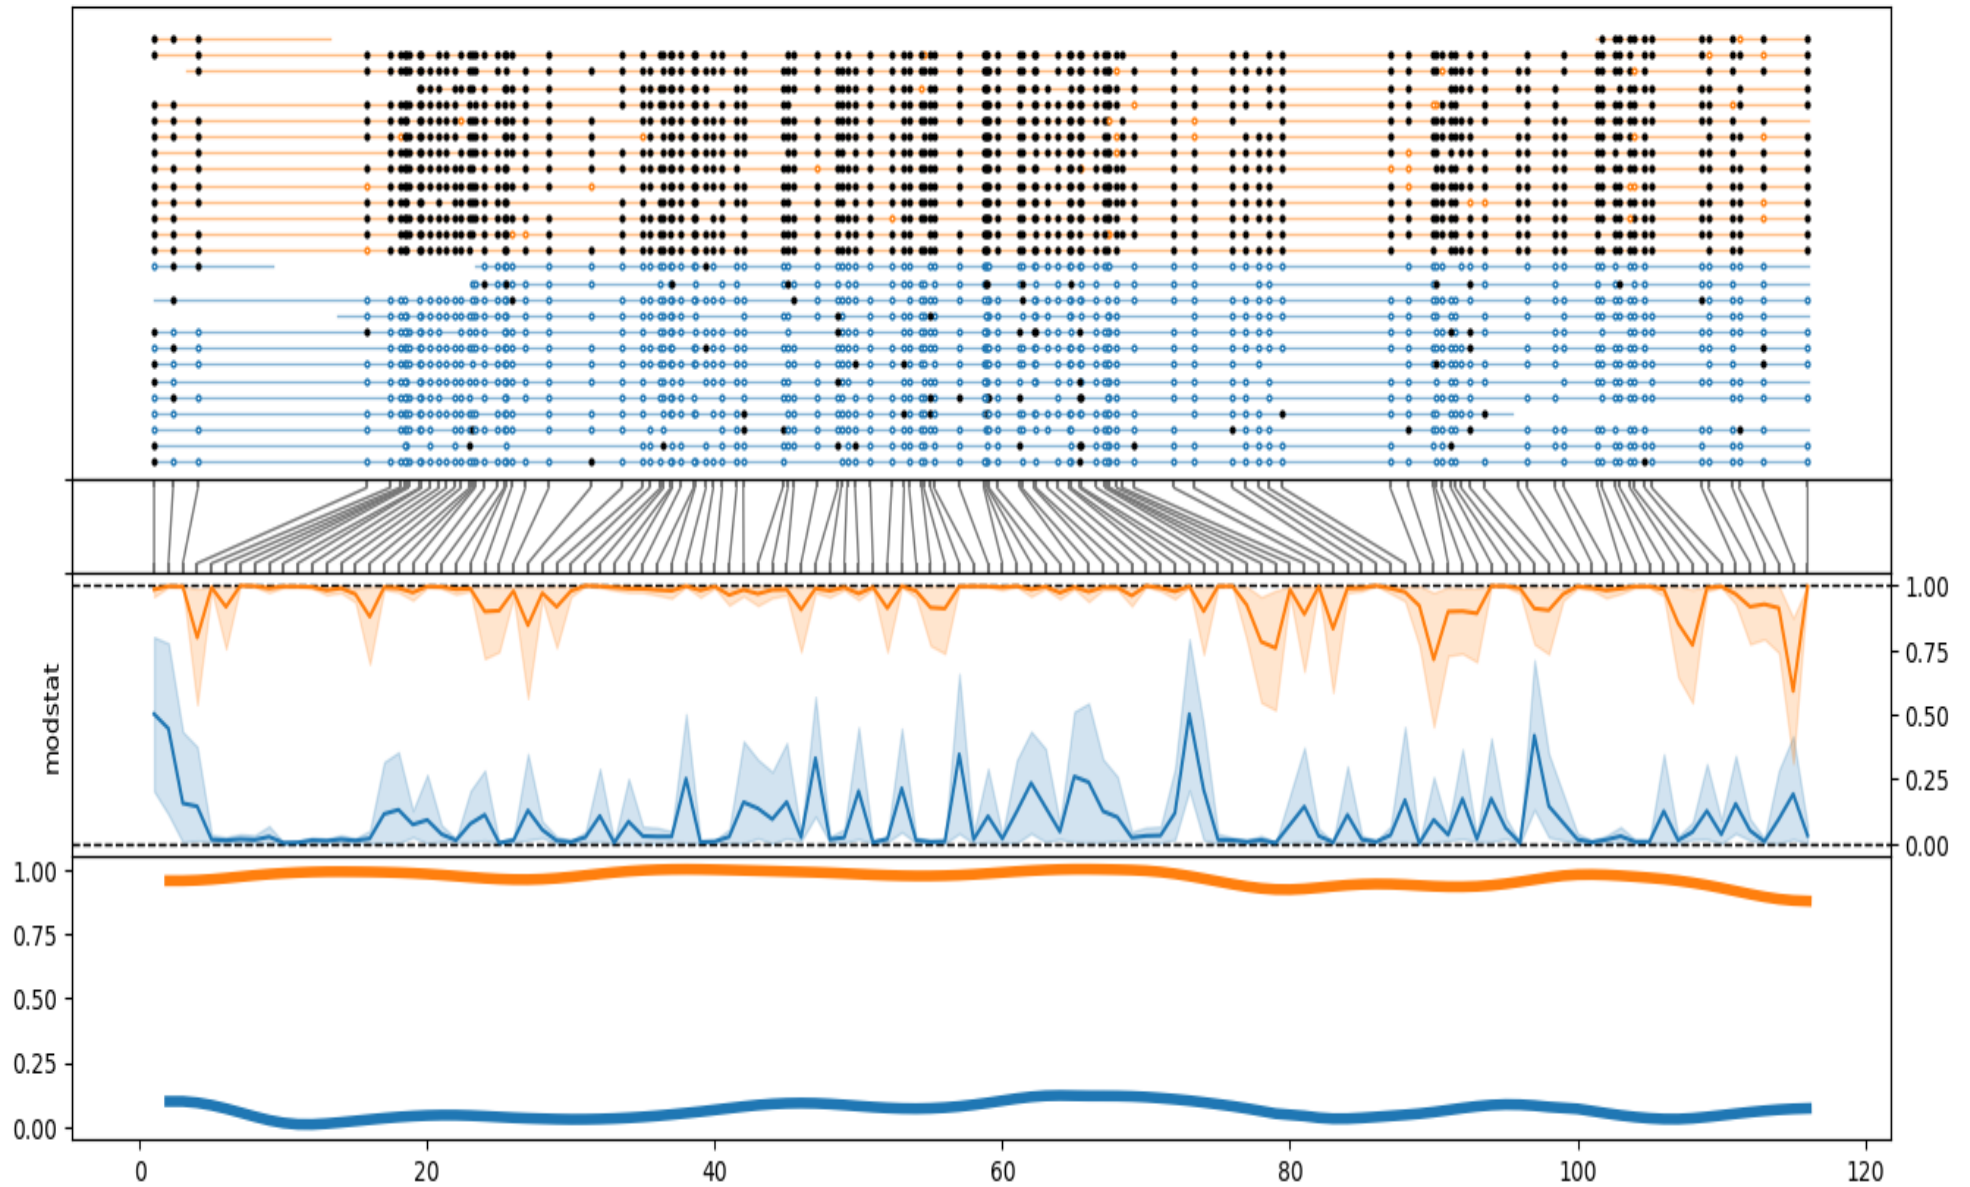

# EPI\_11\_hg38\_phased\_chr11\_1997509\_2003349

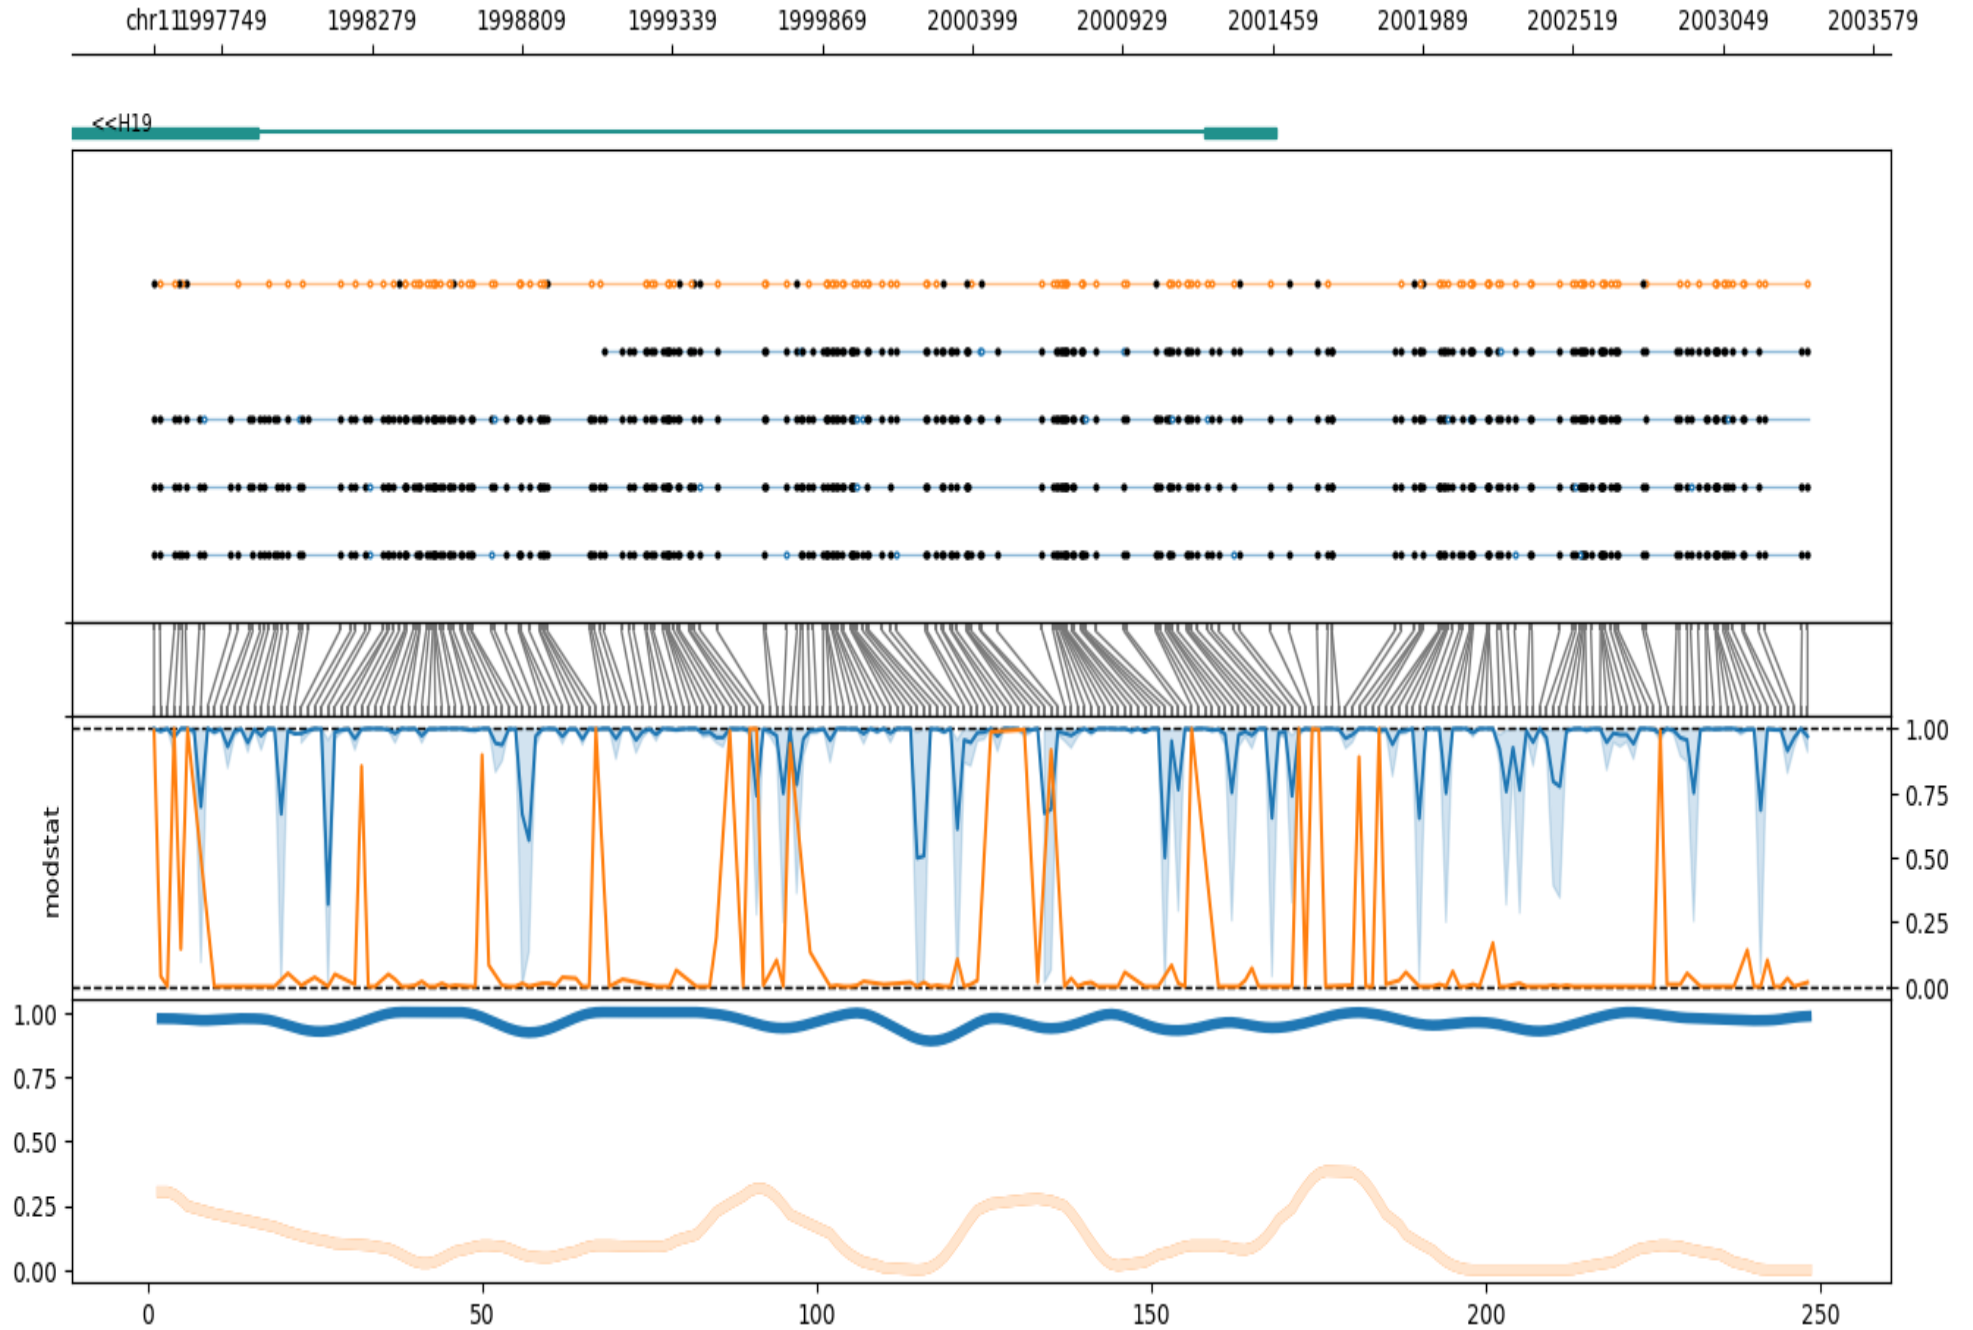

# EPI\_11\_hg38\_phased\_chr11\_2698155\_2701028

chr11:2698274 2698535 2698796 2699057 2699318 2699579 2699840 2700101 2700362 2700623 2700884 2701145

KCNQ1>>

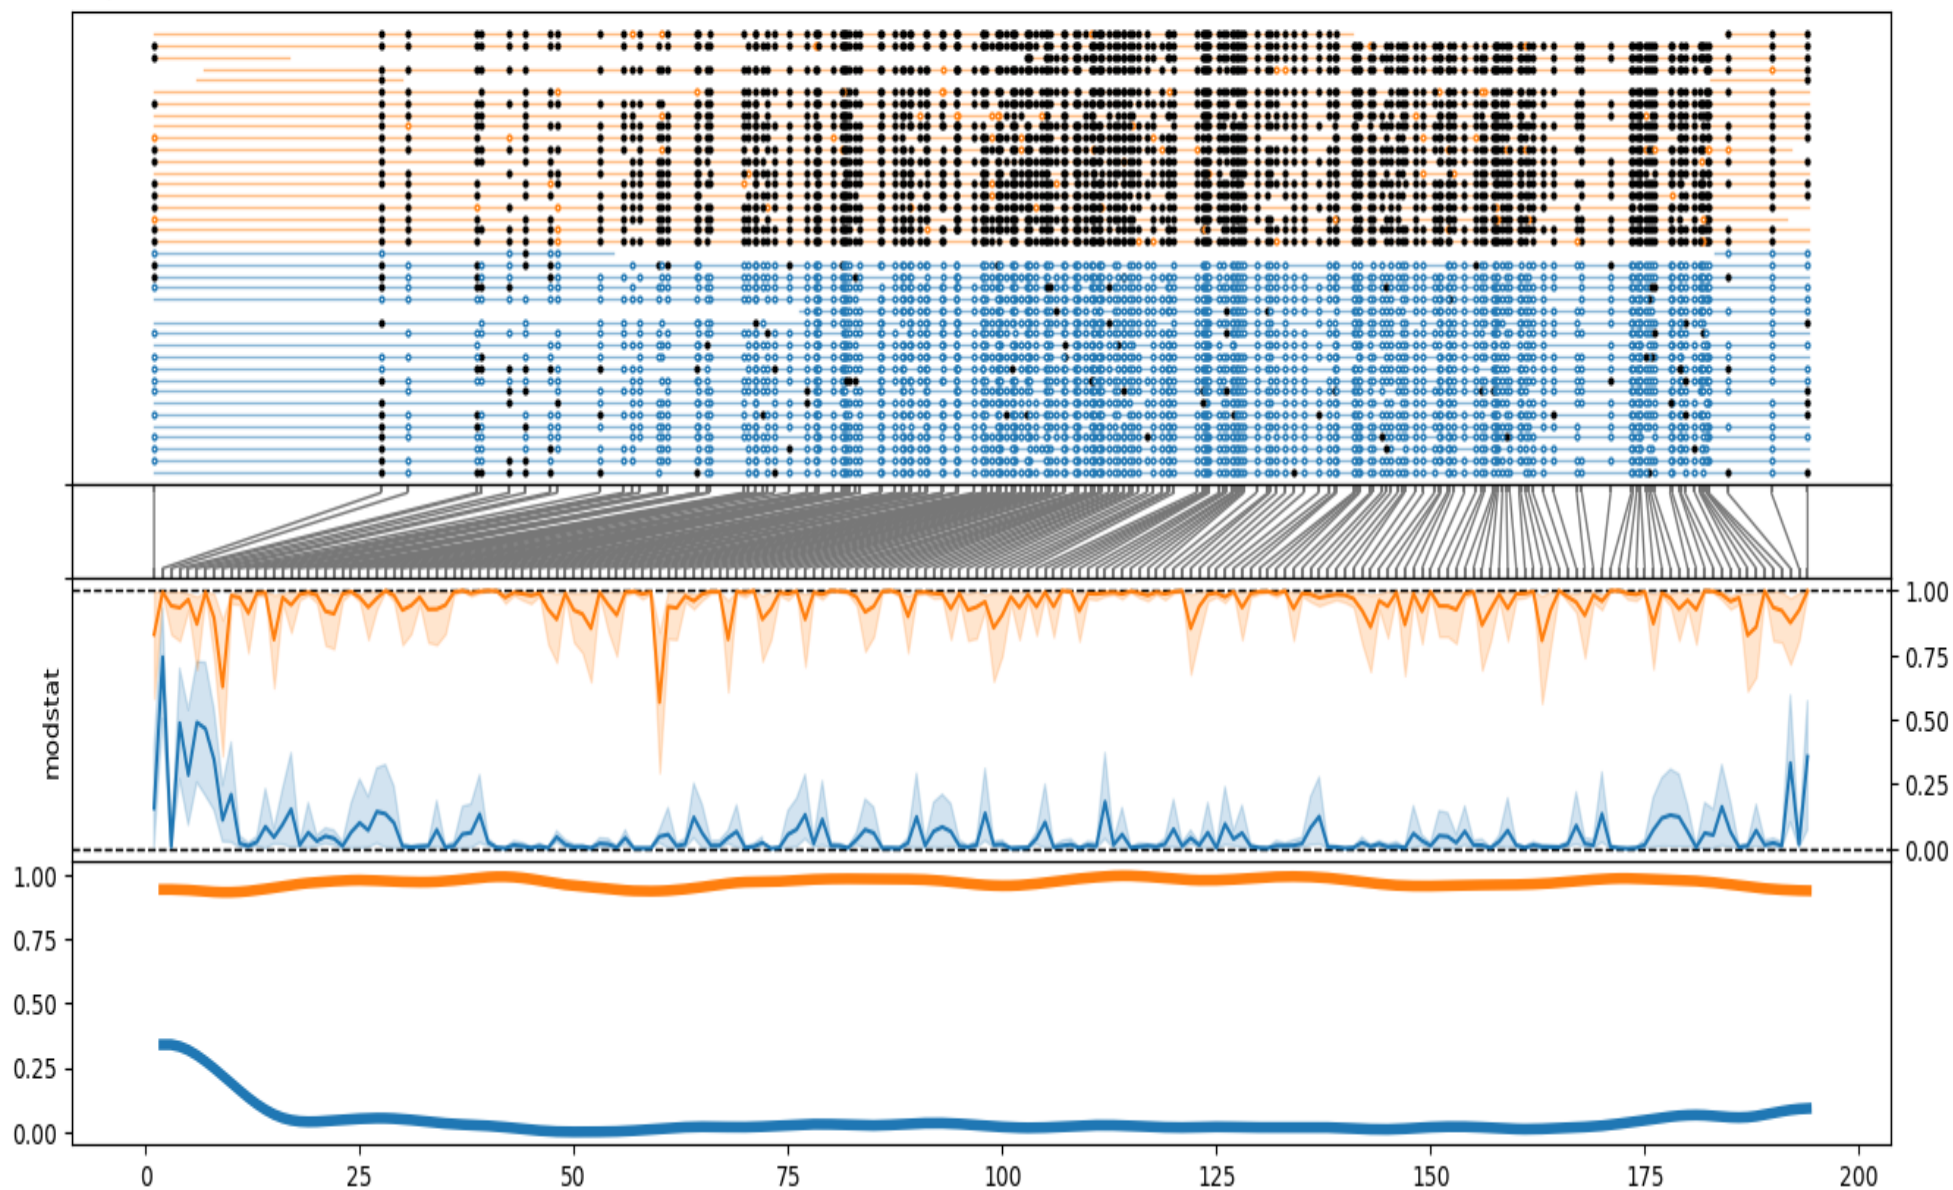



# EPI\_11\_hg38\_phased\_chrom14\_100824185\_100827640

chr14 100824328 100824642 100824956 100825270 100825584 100825898 100826212 100826526 100826840 100827154 100827468 100827782

MEG3>>

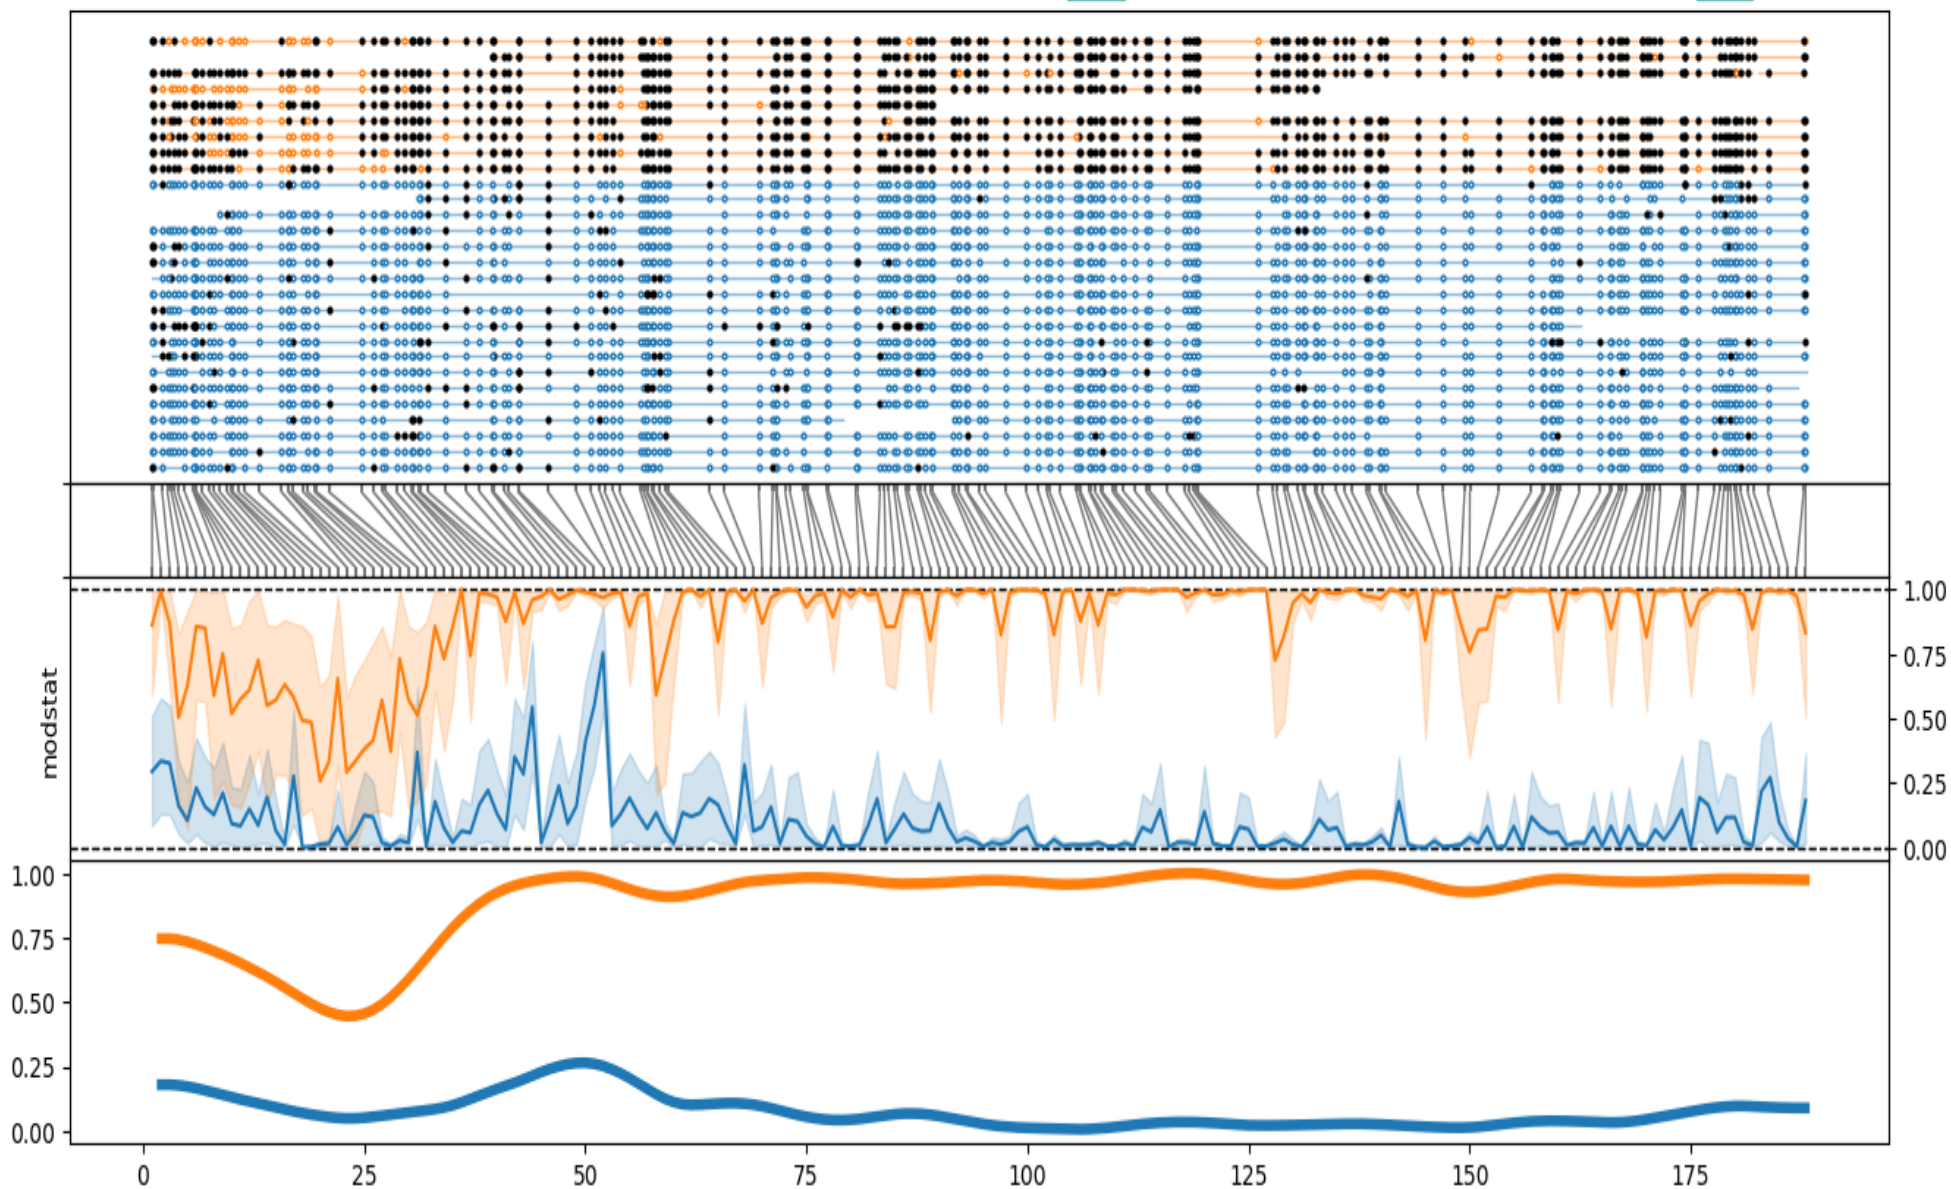

# EPI\_11\_hg38\_phased\_chr14\_100904325\_100905081

chr14 100904356 100904424 100904492 100904560 100904628 100904696 100904764 100904832 100904900 100904968 100905036 100905104

MEG8>>

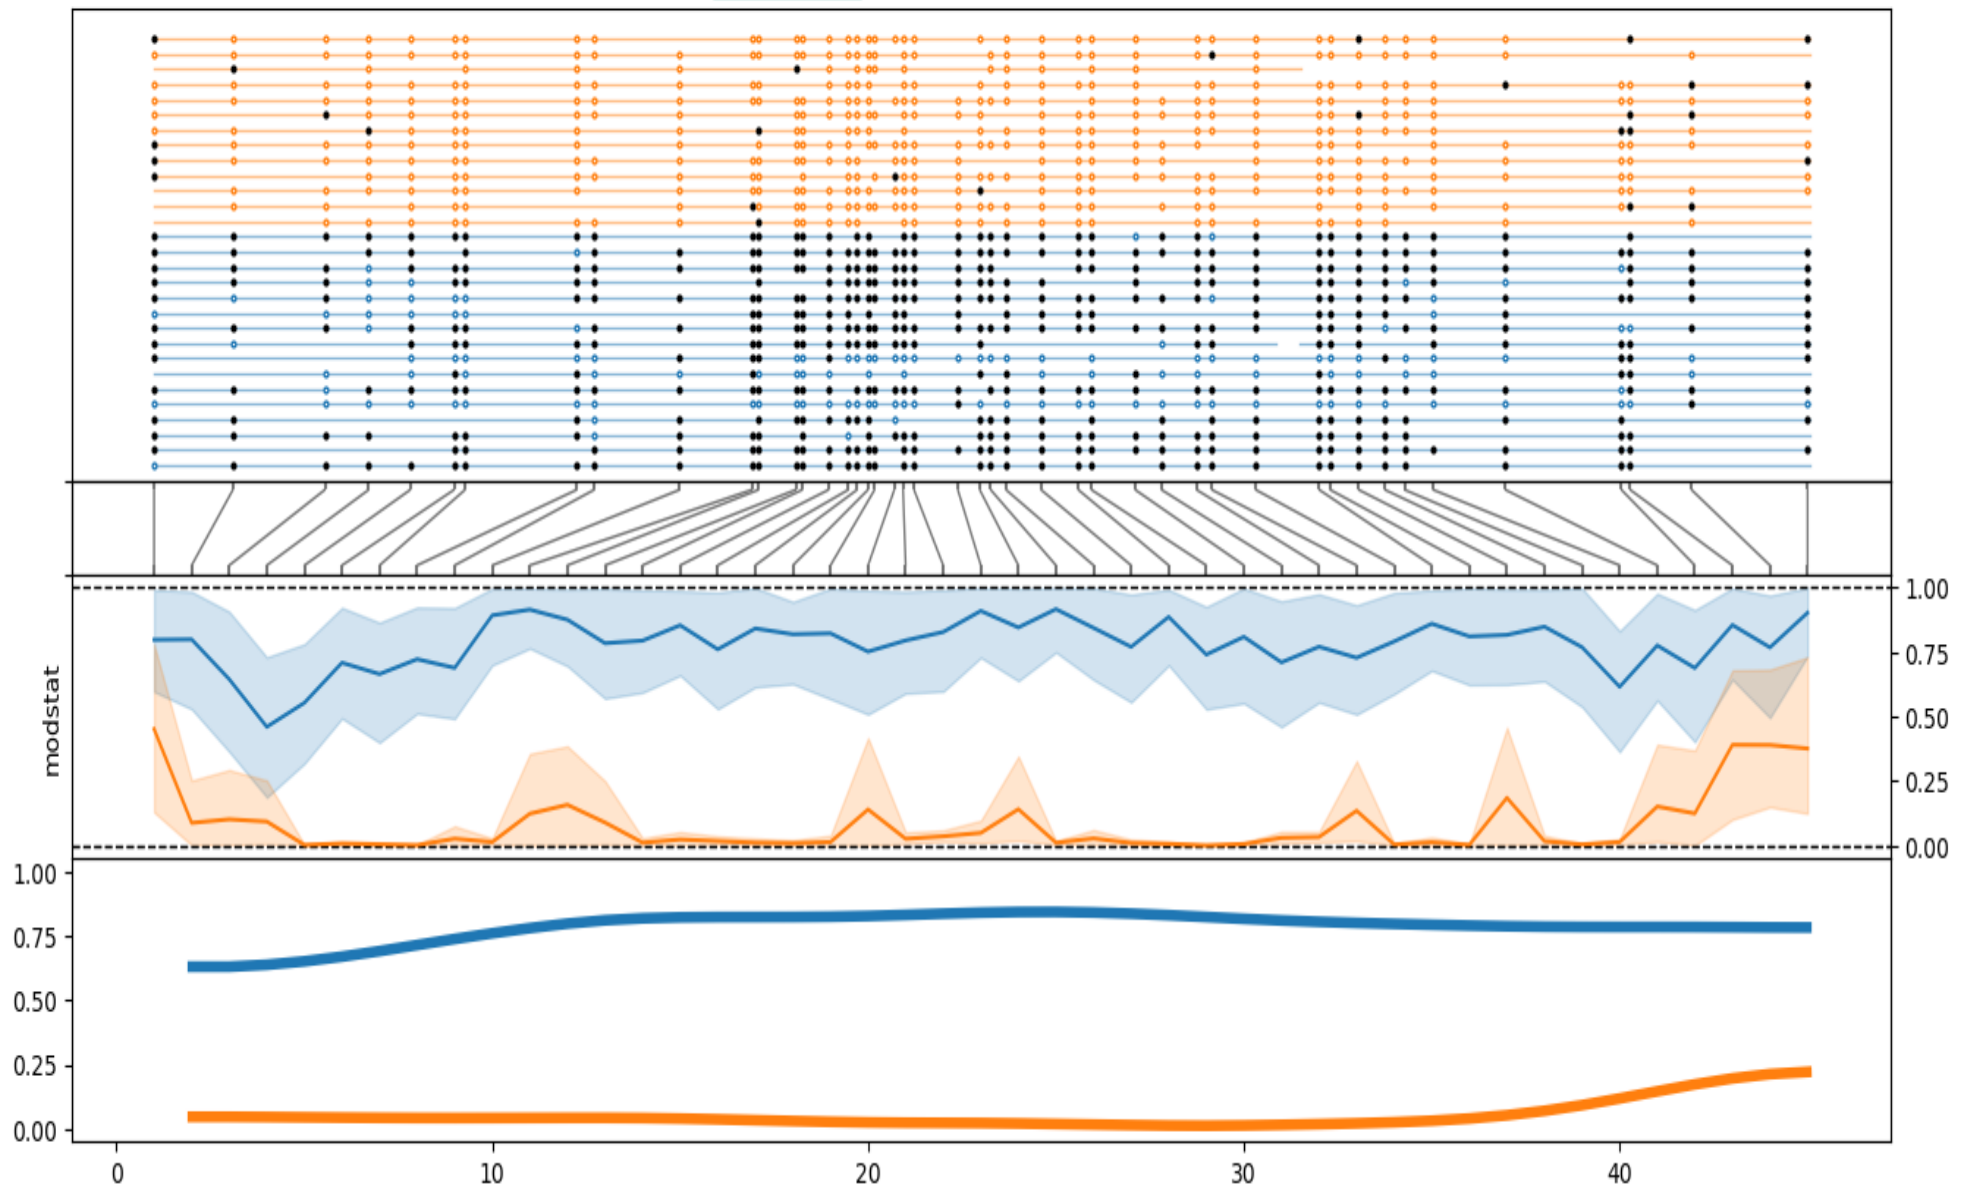

# EPI\_11\_hg38\_phased\_chr15\_23647178\_23648424

chr15:23647229 23647342 23647455 23647568 23647681 23647794 23647907 23648020 23648133 23648246 23648359 23648472

<<MAGEL2

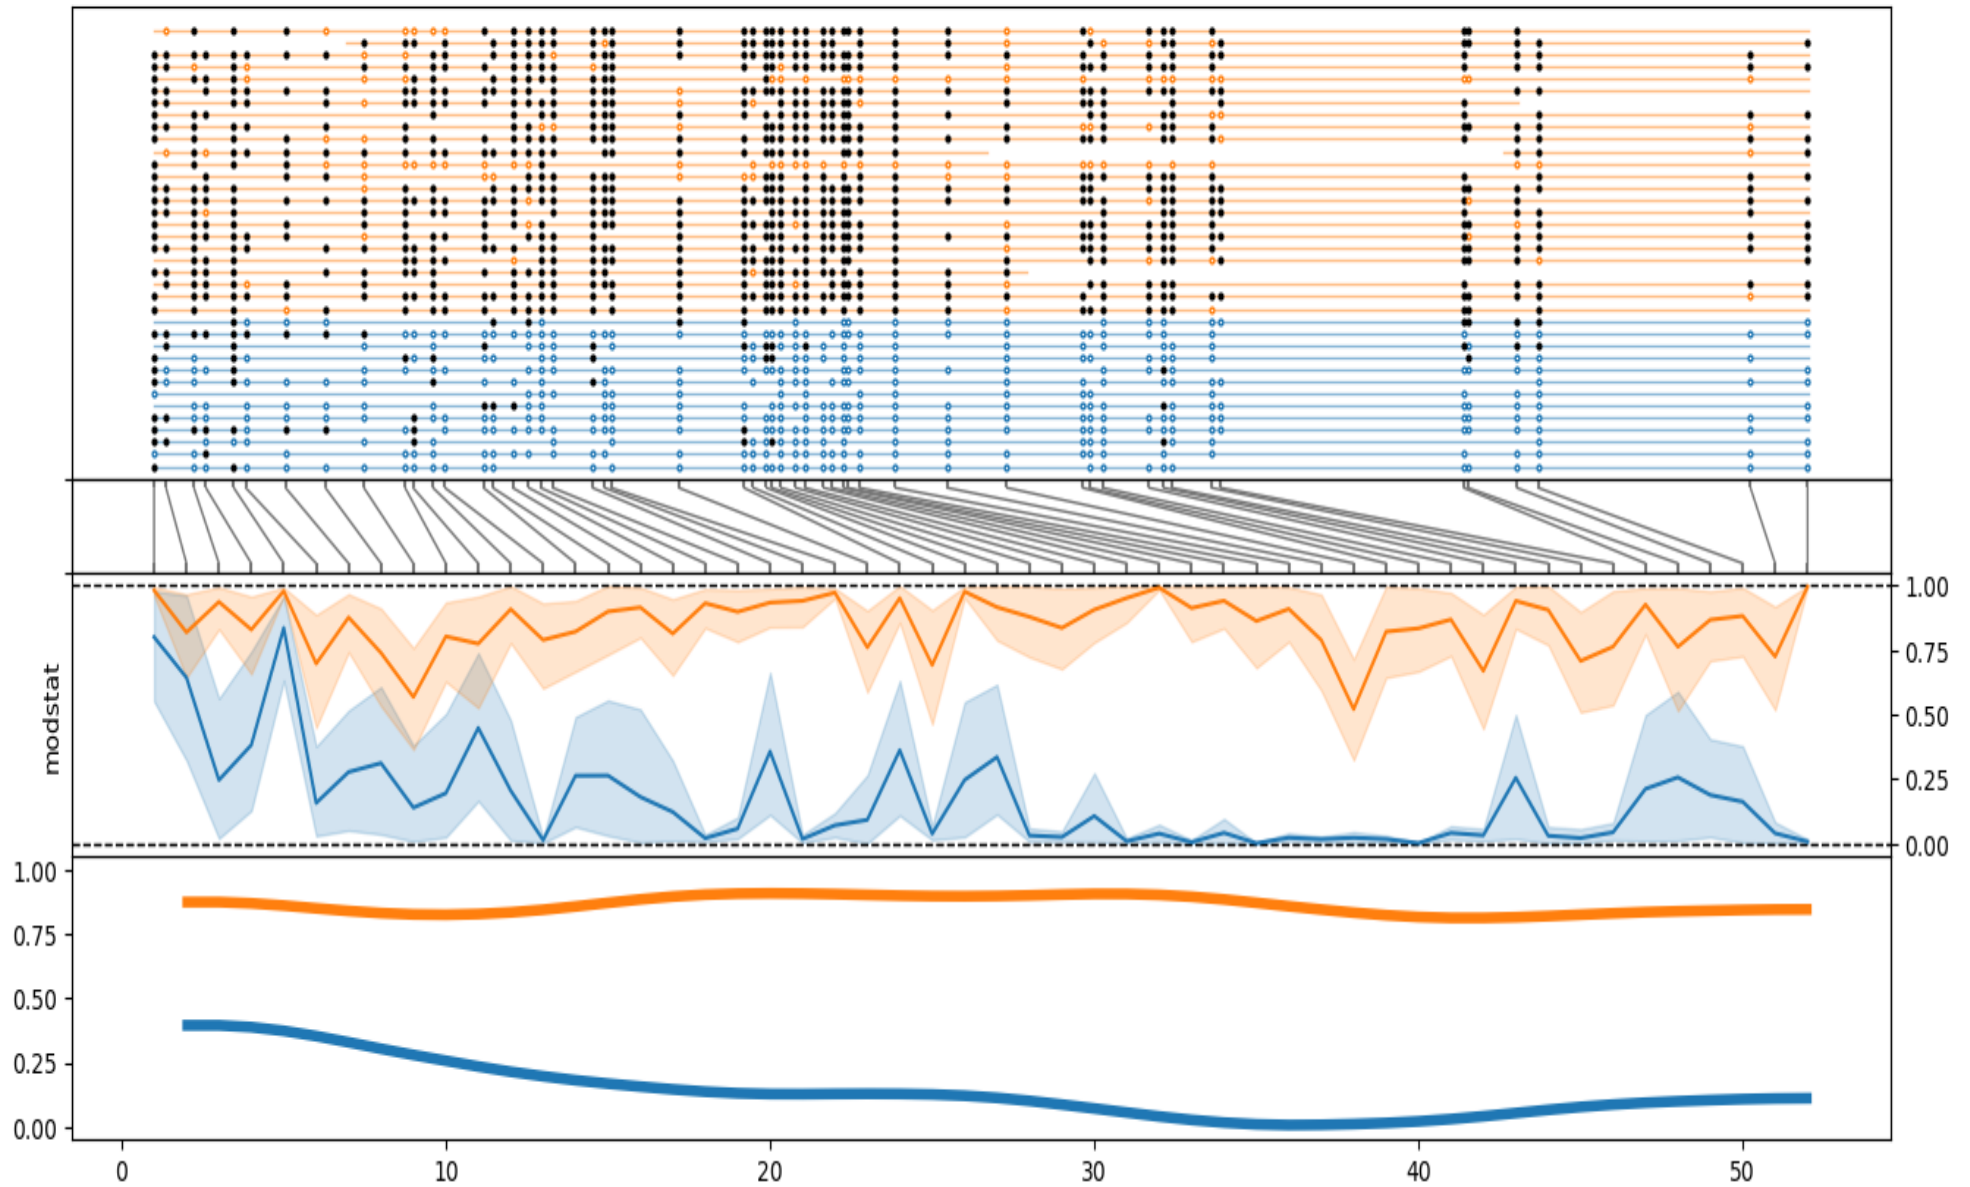

# EPI\_11\_hg38\_phased\_chr15\_24954564\_24956828

chr15:24954657 24954862 24955067 24955272 24955477 24955682 24955887 24956092 24956297 24956502 24956707 24956912

SNRPN>>

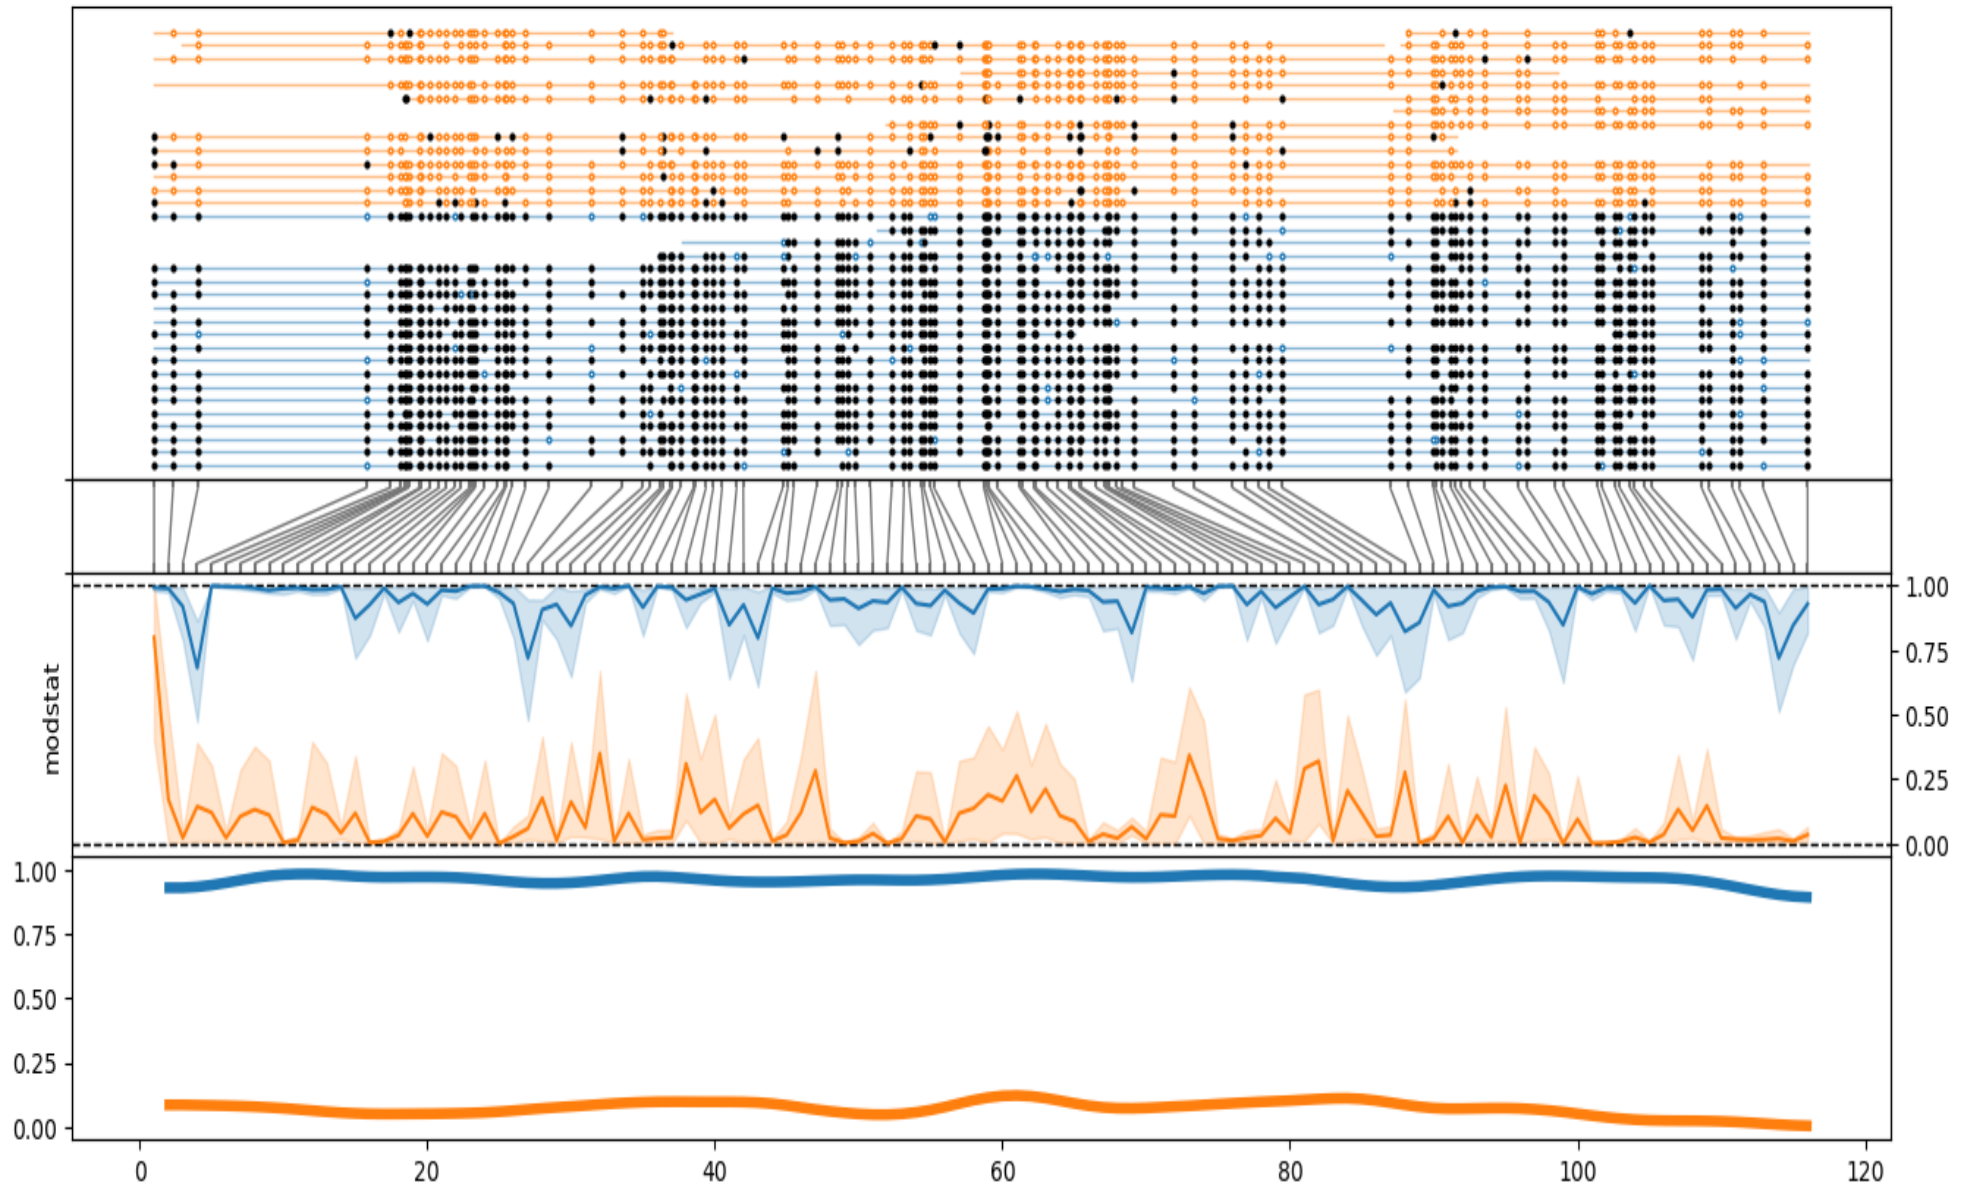



# EPI\_12\_hg38\_phased\_chr11\_1997509\_2003349

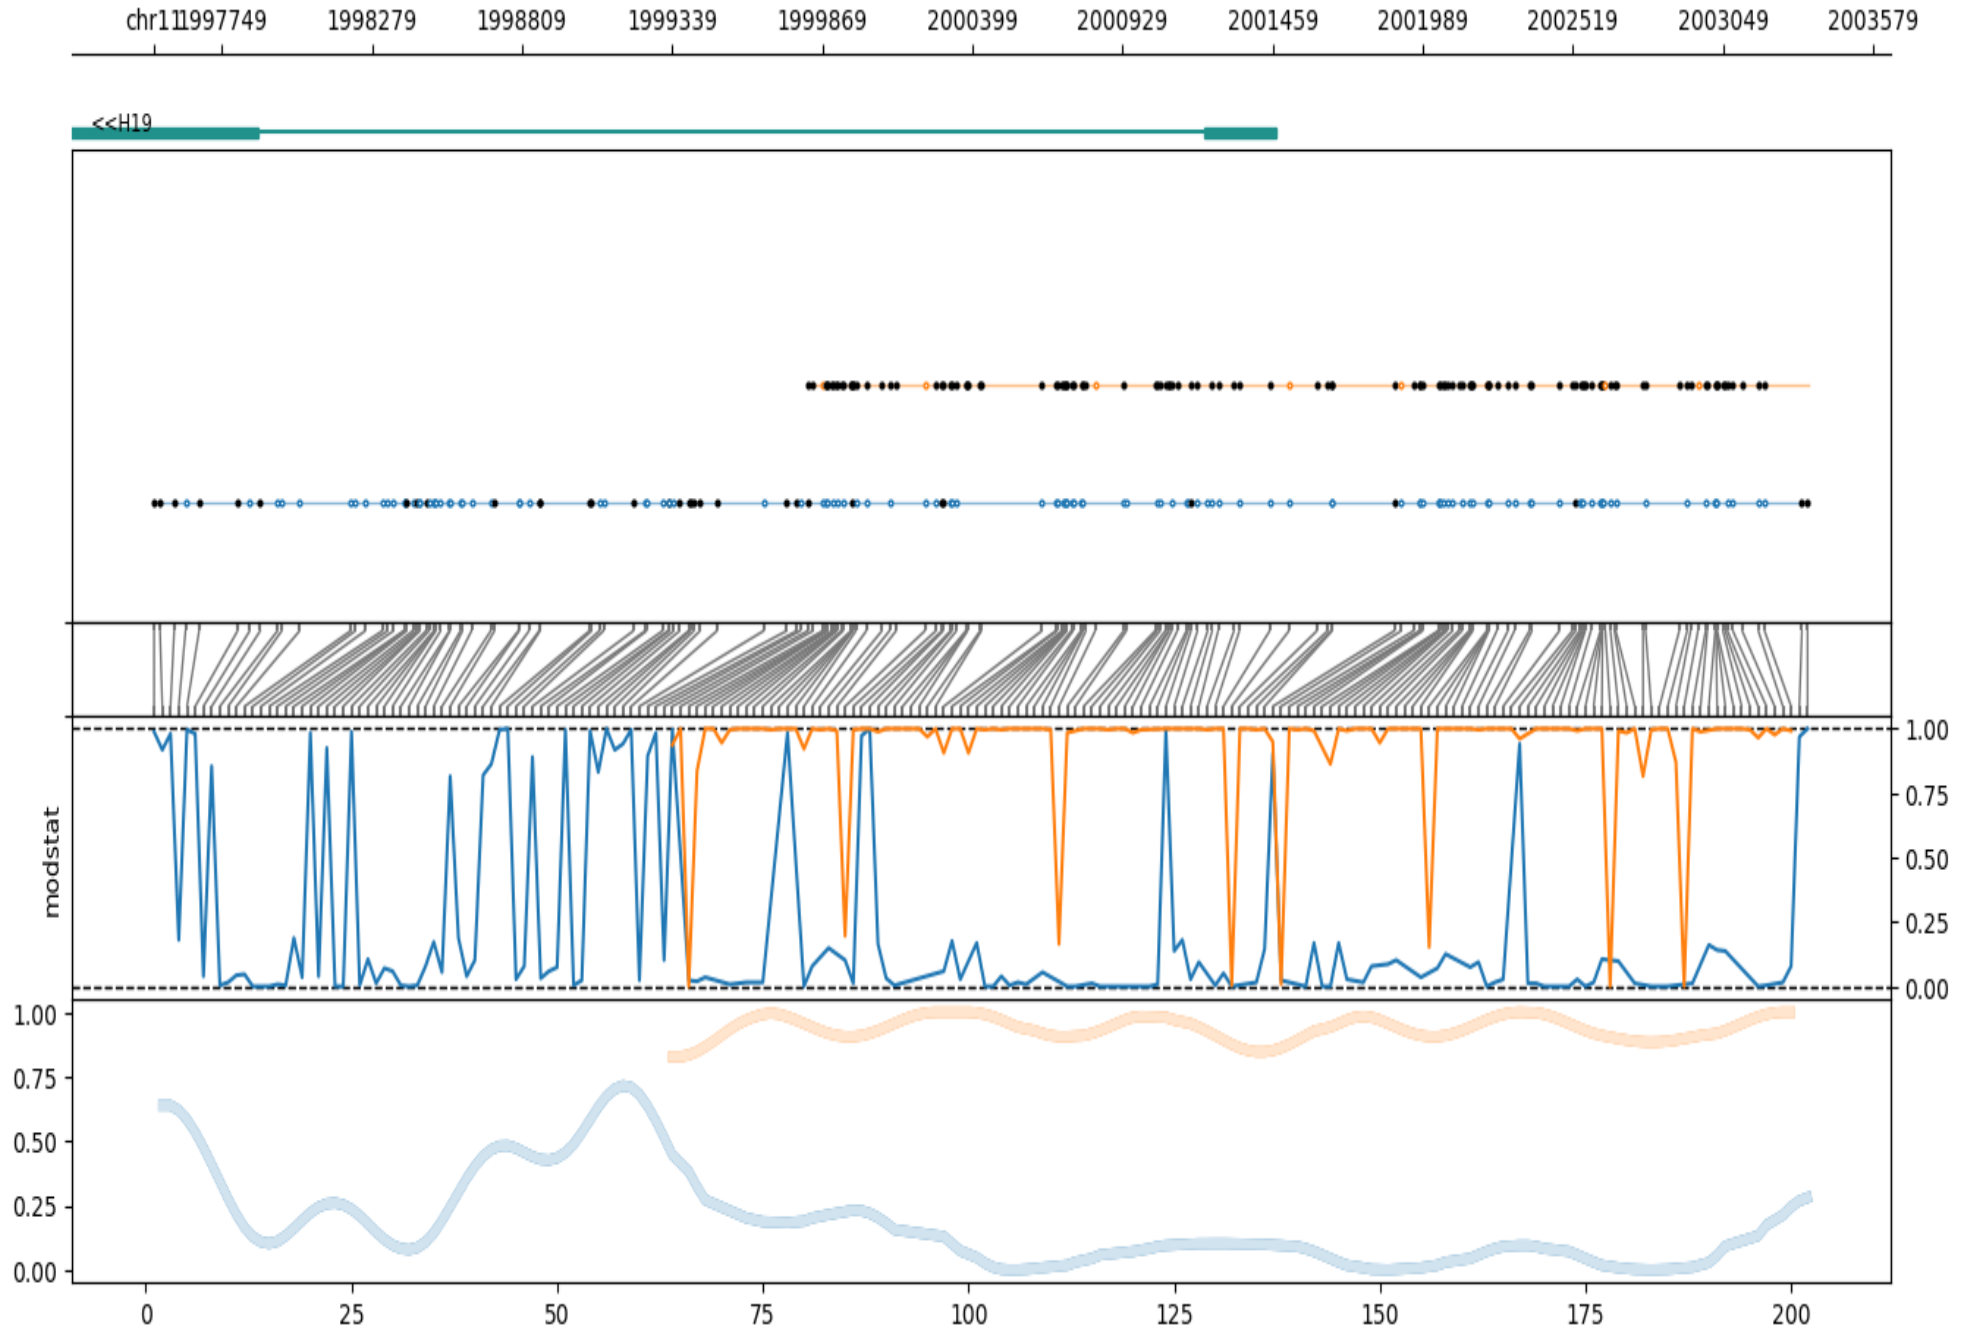

# EPI\_12\_hg38\_phased\_chr11\_2698155\_2701028

chr11 2698274 2698535 2698796 2699057 2699318 2699579 2699840 2700101 2700362 2700623 2700884 2701145

KCNQ1>>

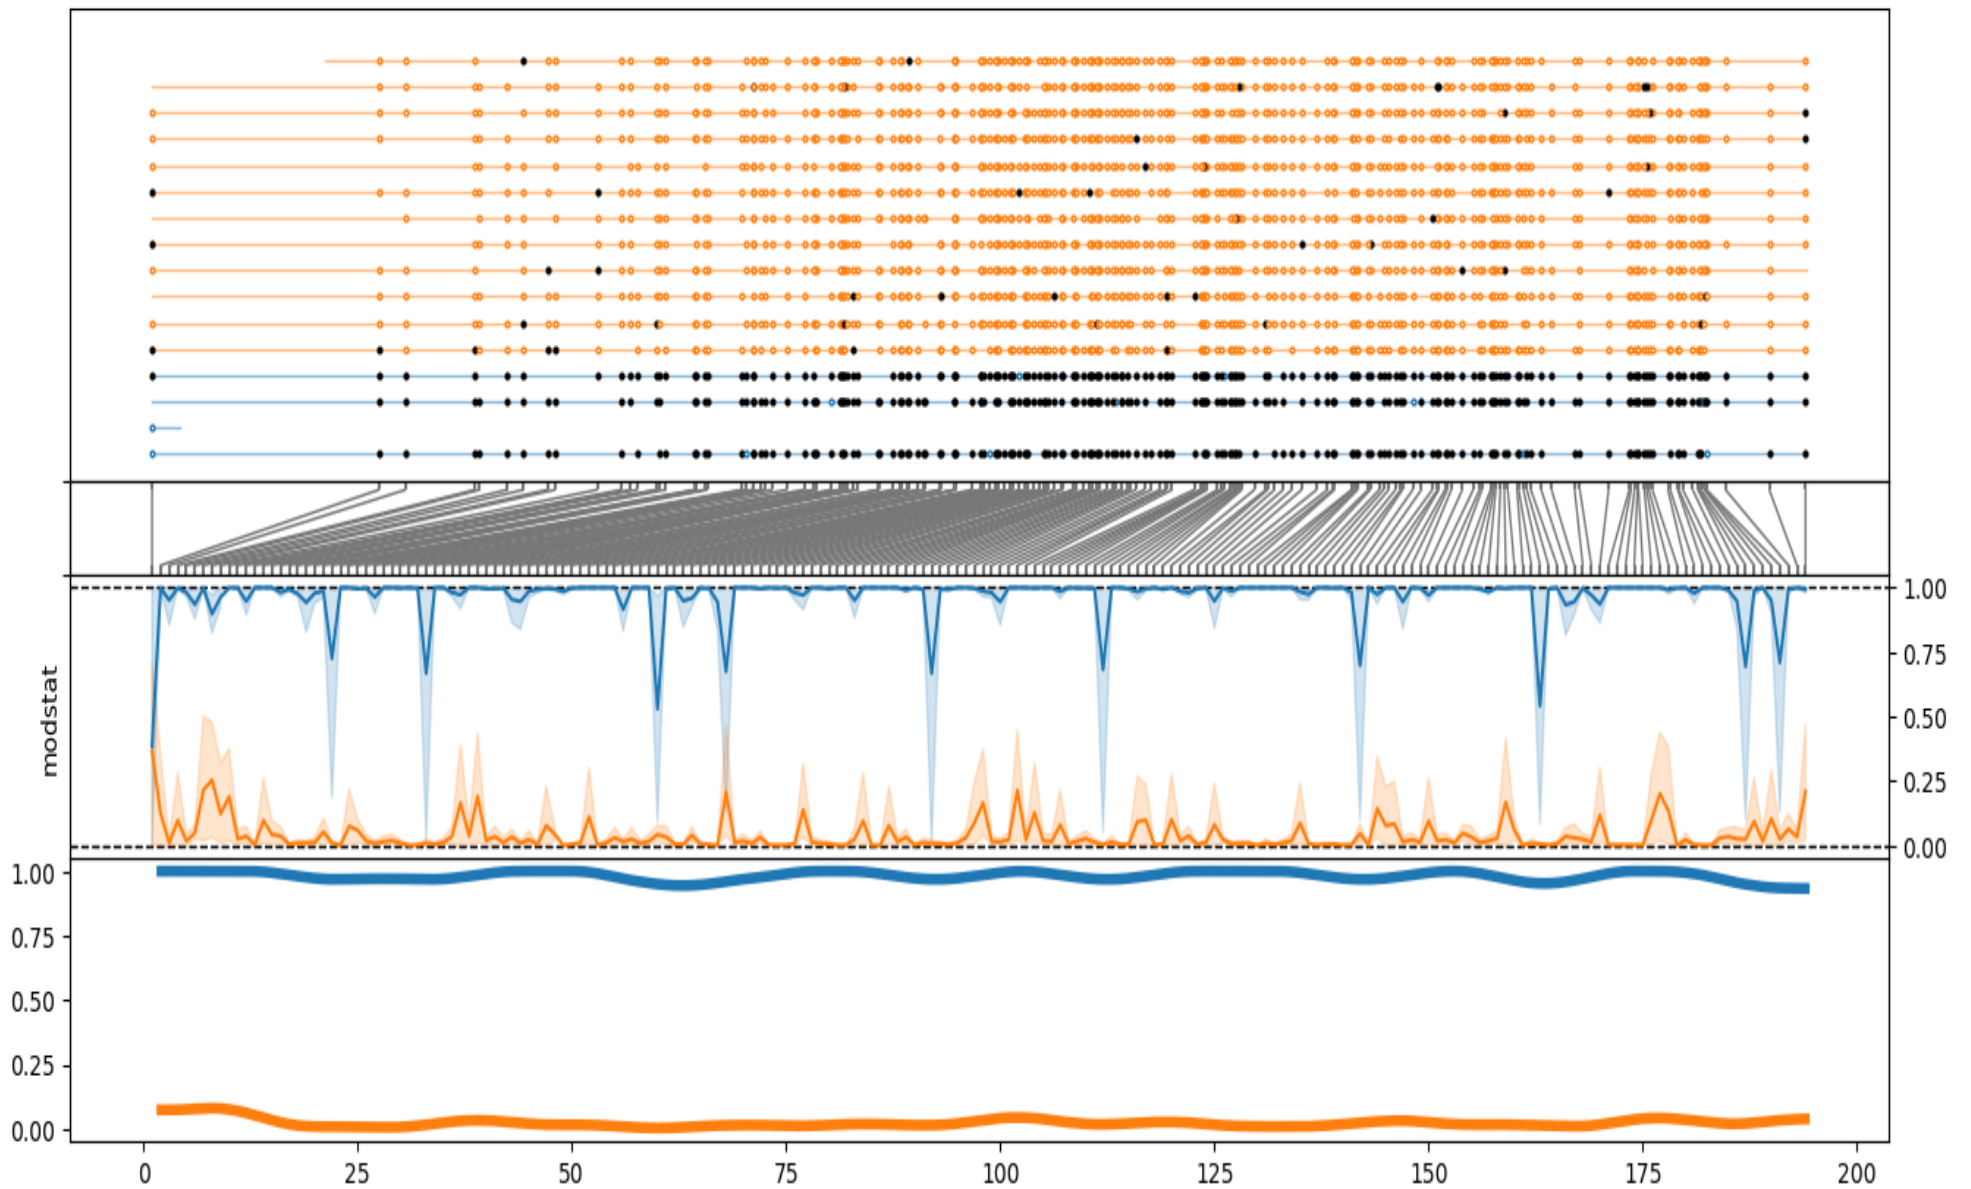

# EPI\_12\_hg38\_phased\_chr14\_100824185\_100827640

chr14 100824328 100824642 100824956 100825270 100825584 100825898 100826212 100826526 100826840 100827154 100827468 100827782

MEG3>>

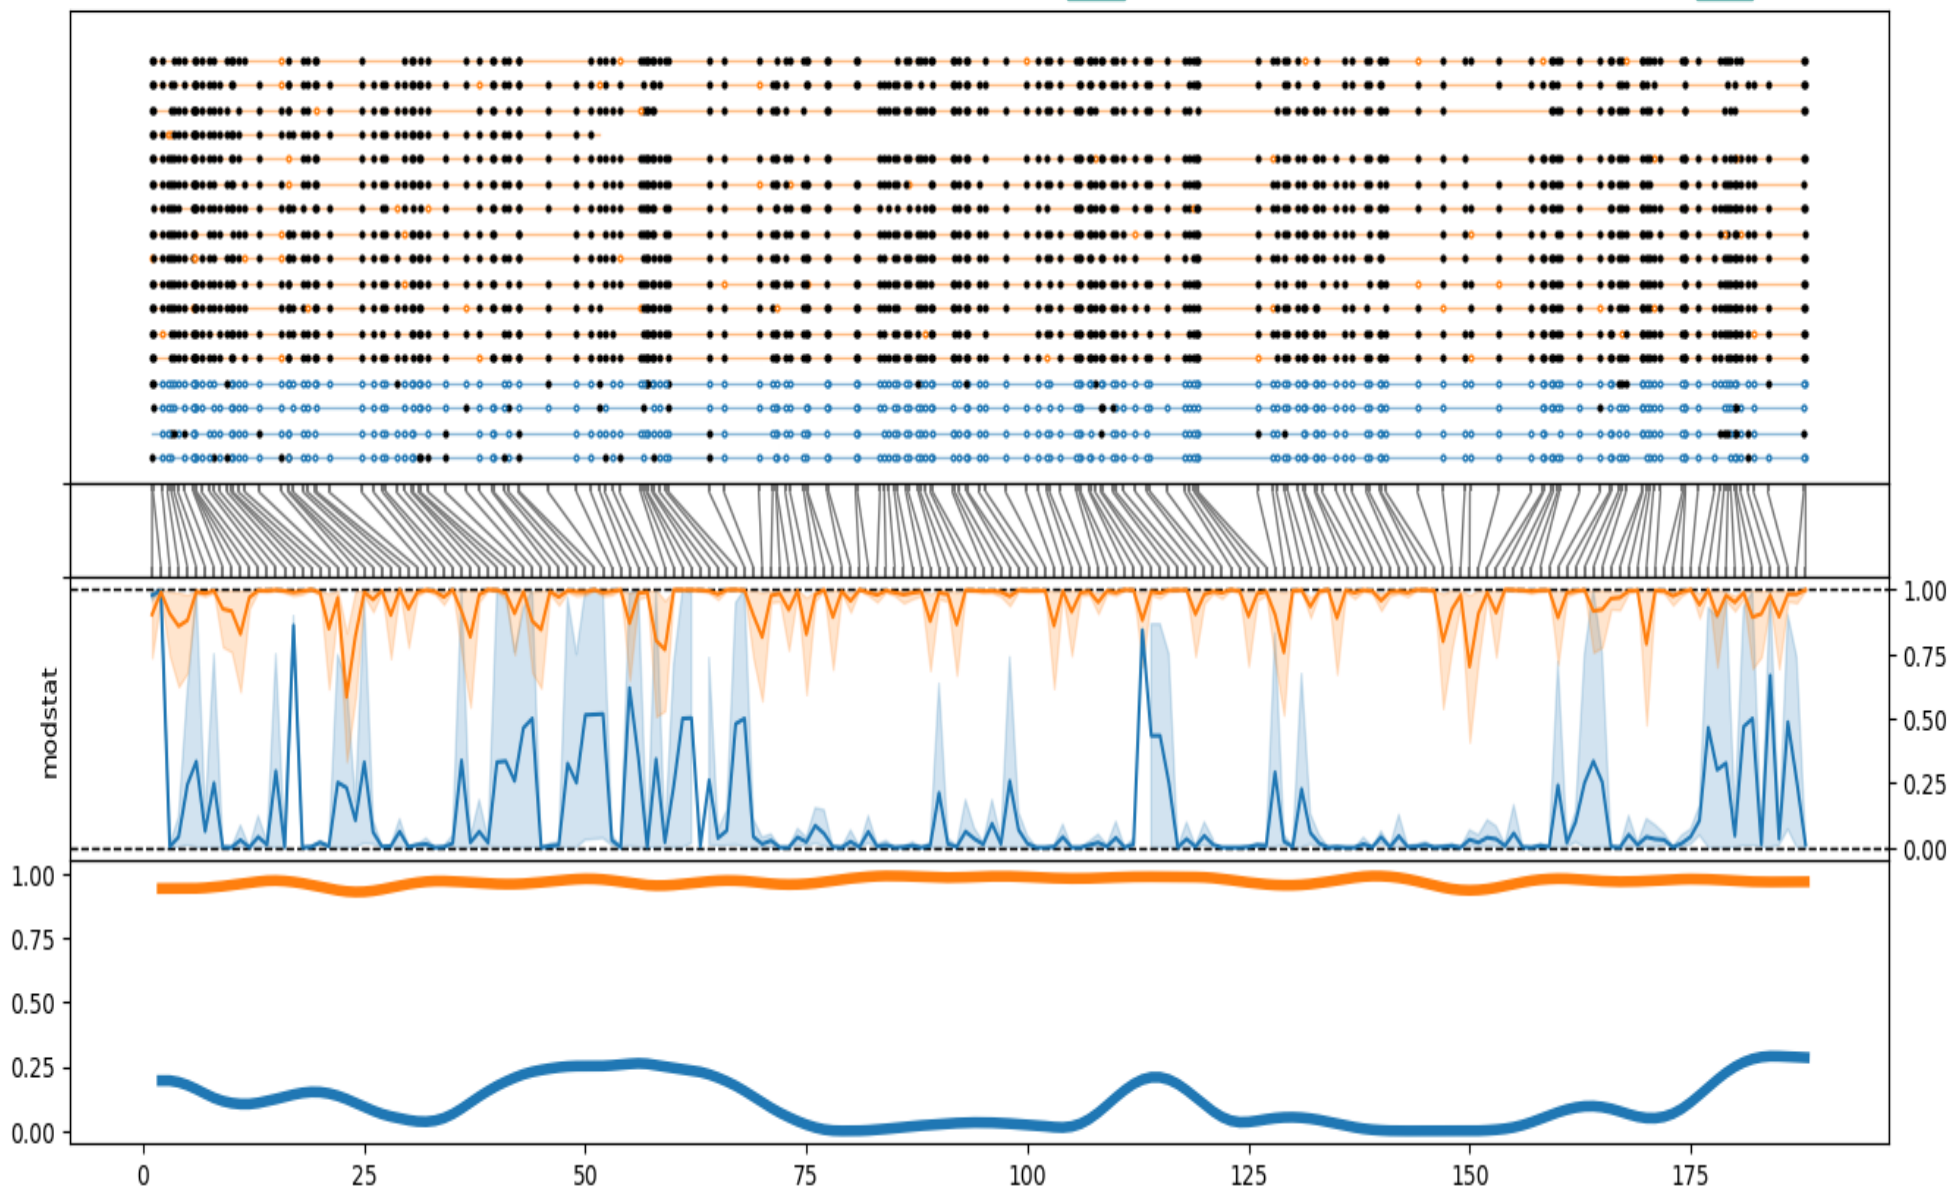

# EPI\_12\_hg38\_phased\_chr14\_100904325\_100905081

chr14 100904356 100904424 100904492 100904560 100904628 100904696 100904764 100904832 100904900 100904968 100905036 100905104

MEG8>>

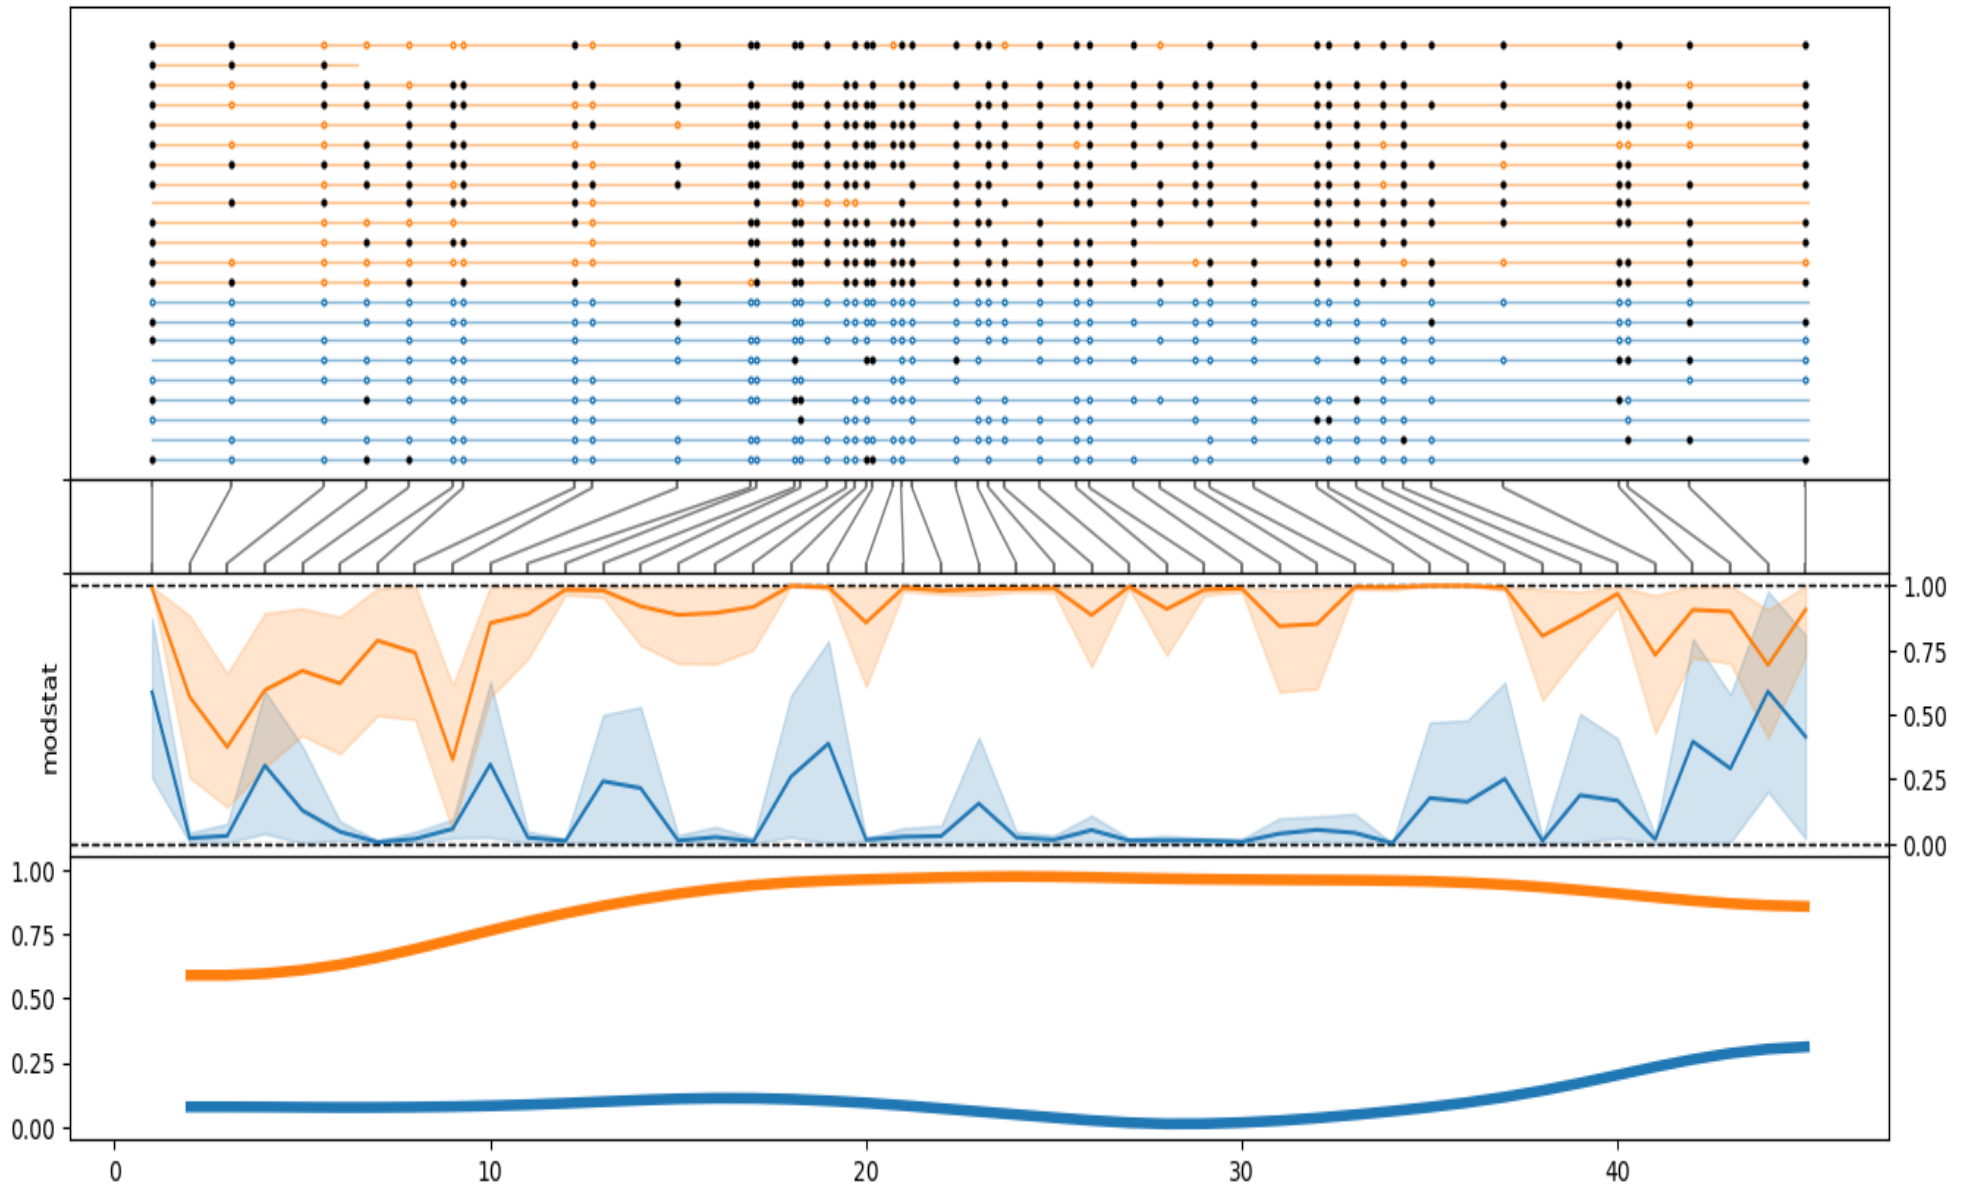



# EPI\_12\_hg38\_phased\_chr15\_23647178\_23648424

chr15:23647229 23647342 23647455 23647568 23647681 23647794 23647907 23648020 23648133 23648246 23648359 23648472

<<MAGEL2

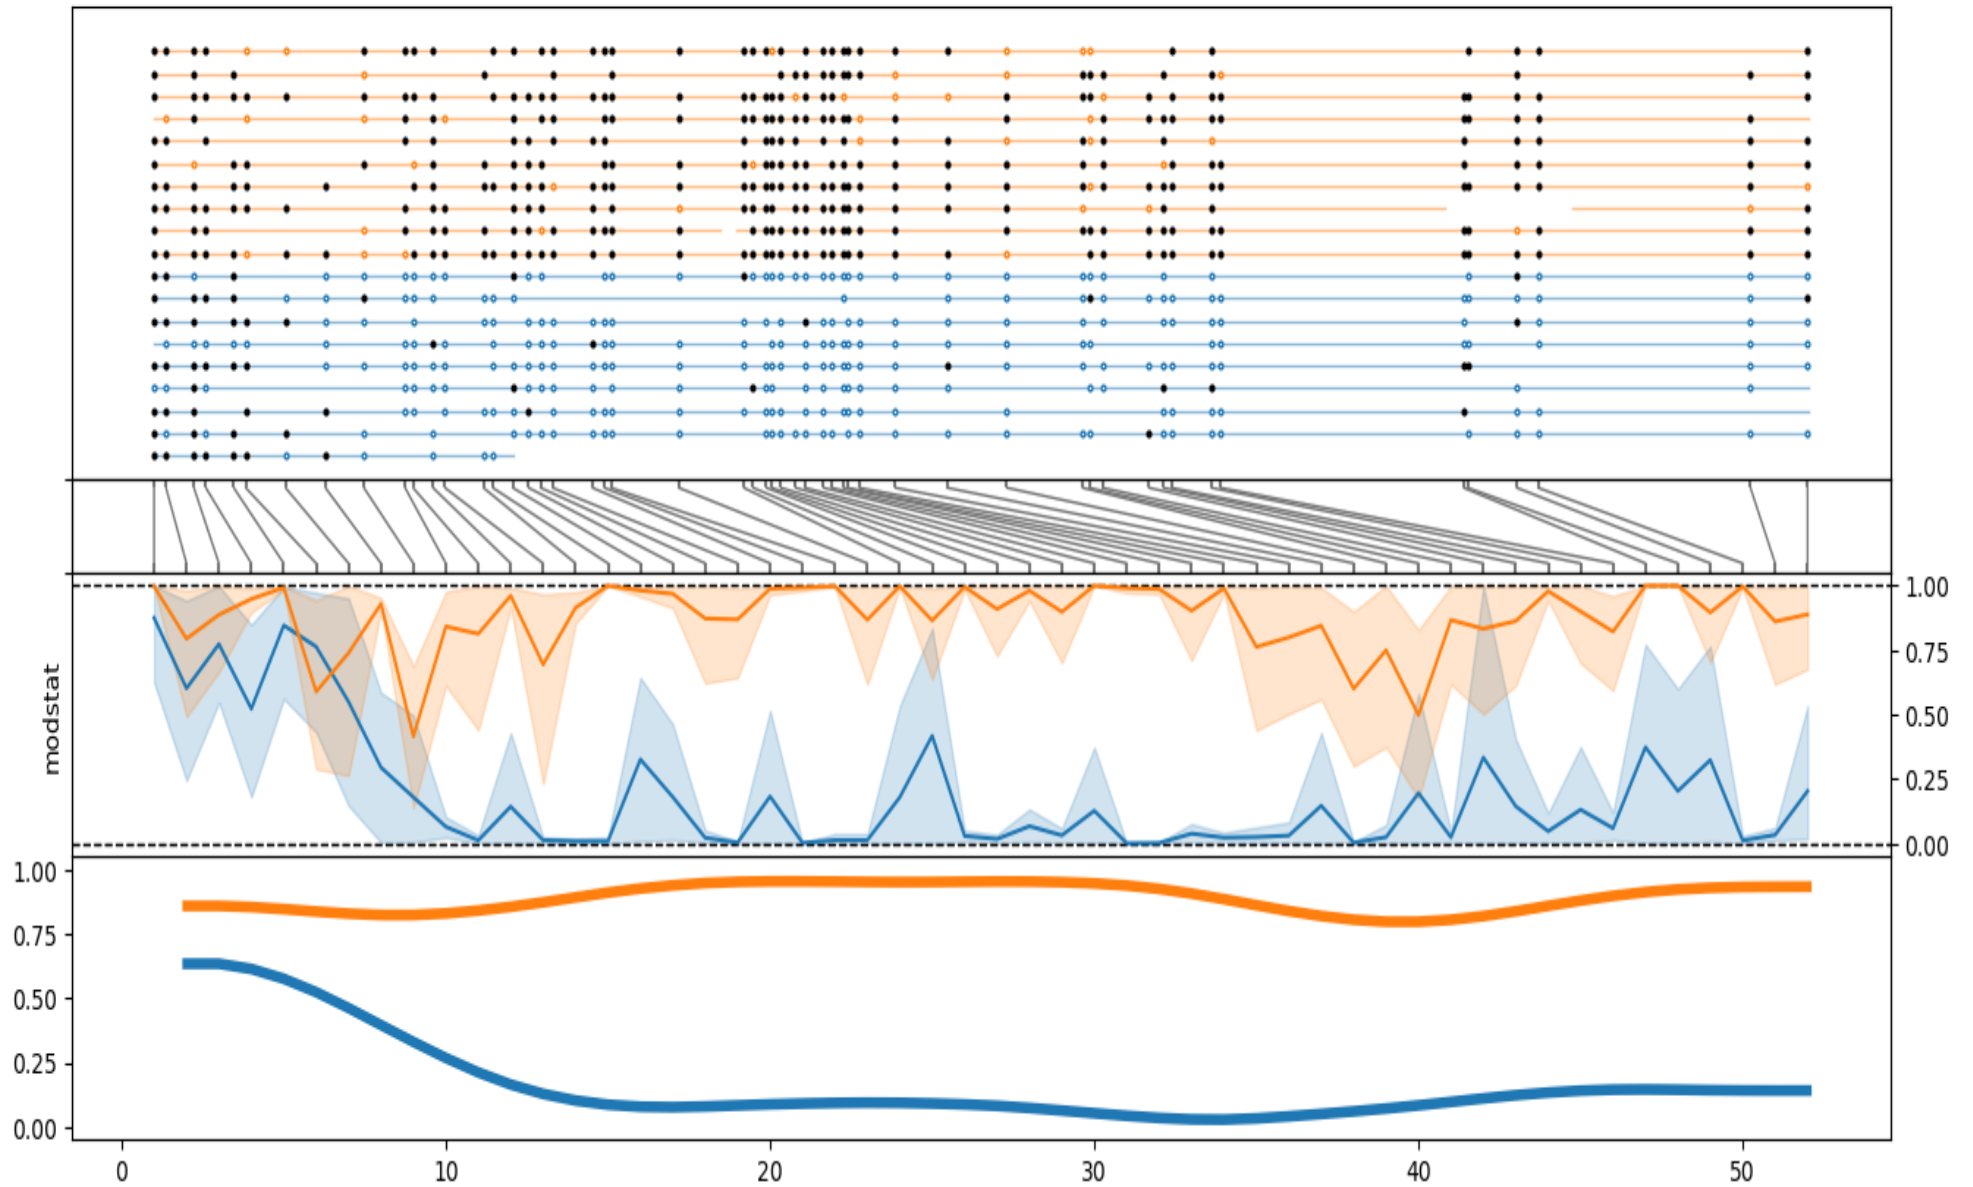

# EPI\_12\_hg38\_phased\_chr15\_24954564\_24956828

chr15:24954564-24956828

SNRPN>>

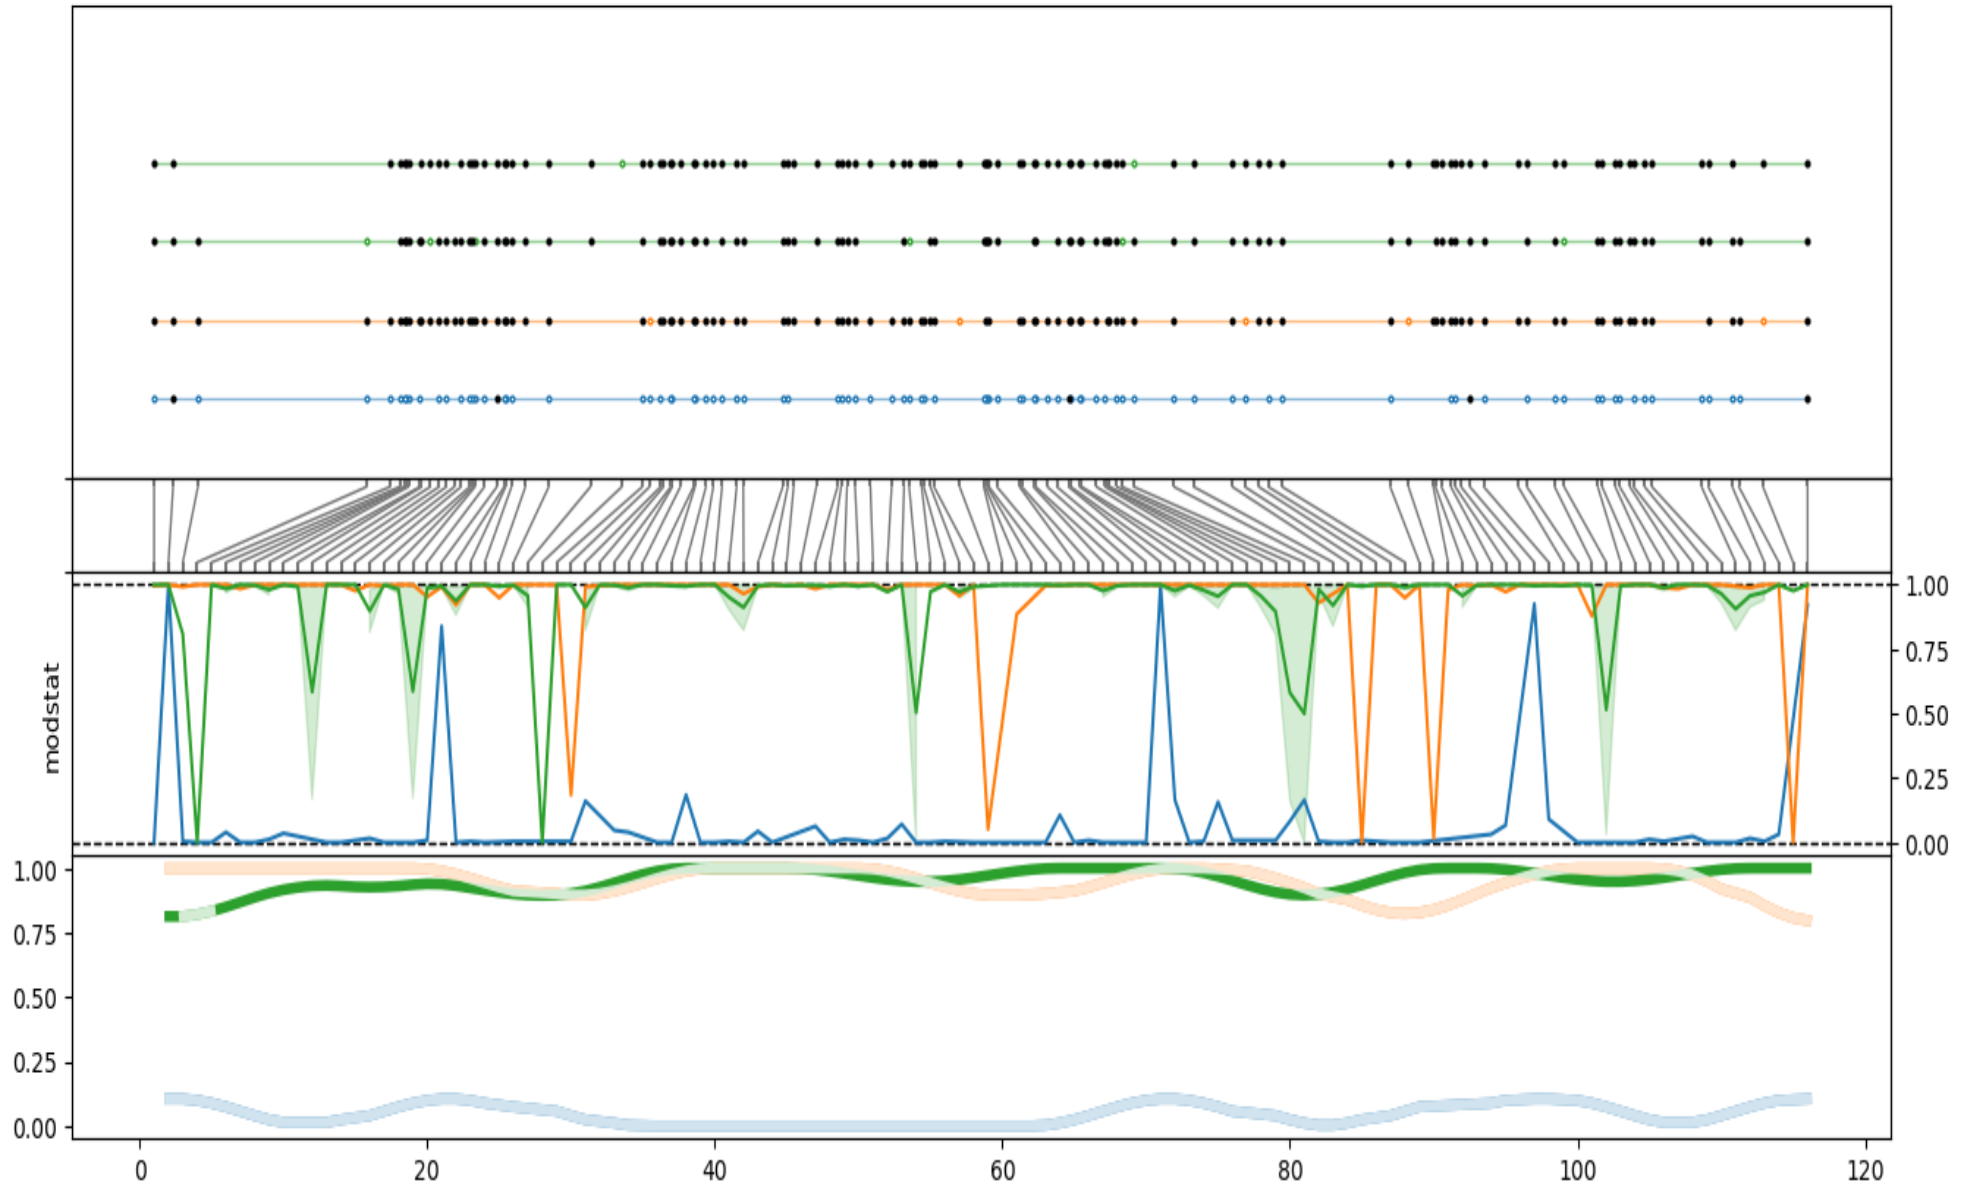

# EPI\_12\_hg38\_phased\_chrX\_134372110\_134374891

chrX 134372223 134372475 134372727 134372979 134373231 134373483 134373735 134373987 134374239 134374491 134374743 134374995

PHF6>>

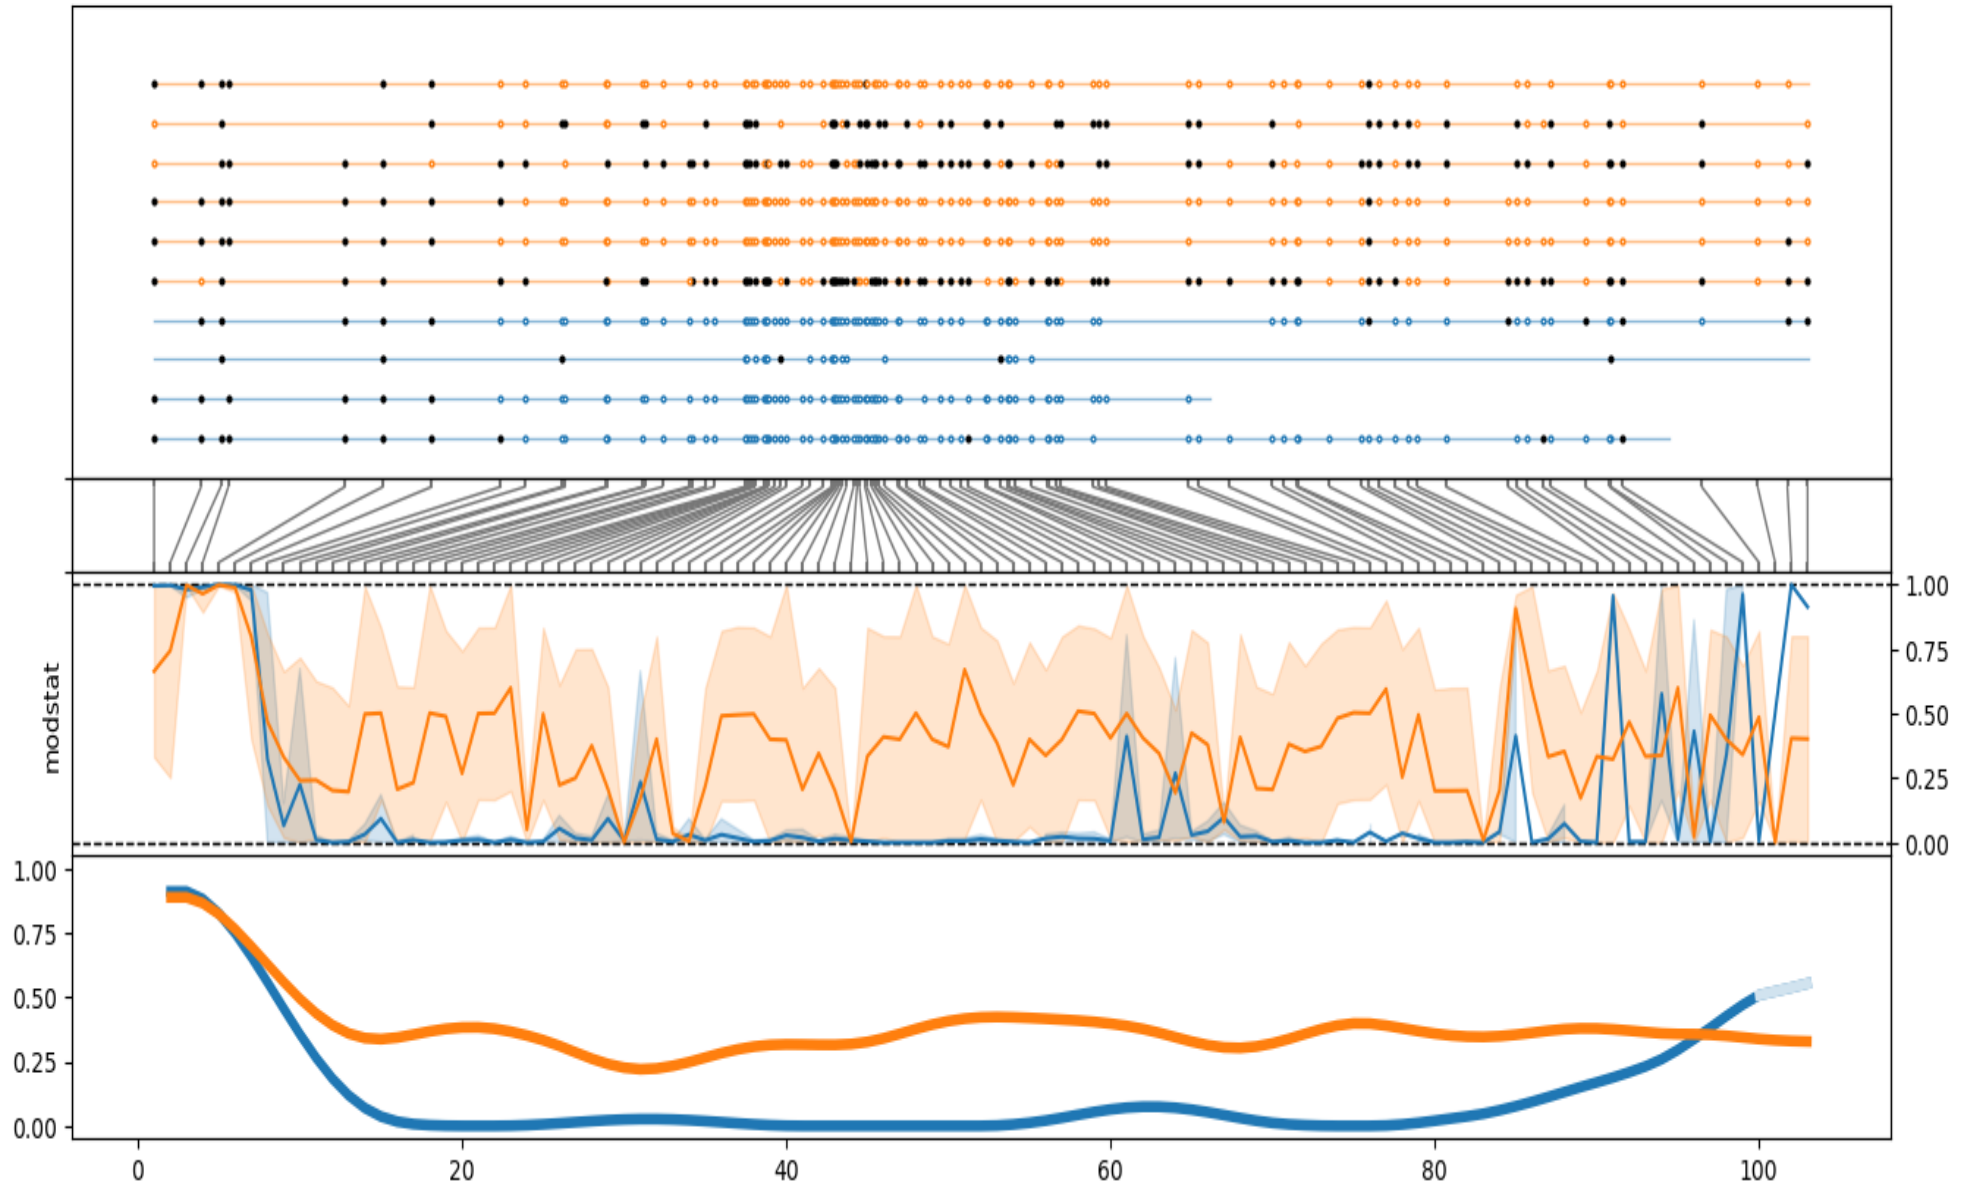

# EPI\_12\_hg38\_phased\_chrX\_46836539\_46837273

chrX:46836569 46836635 46836701 46836767 46836833 46836899 46836965 46837031 46837097 46837163 46837229 46837295

RP2>>

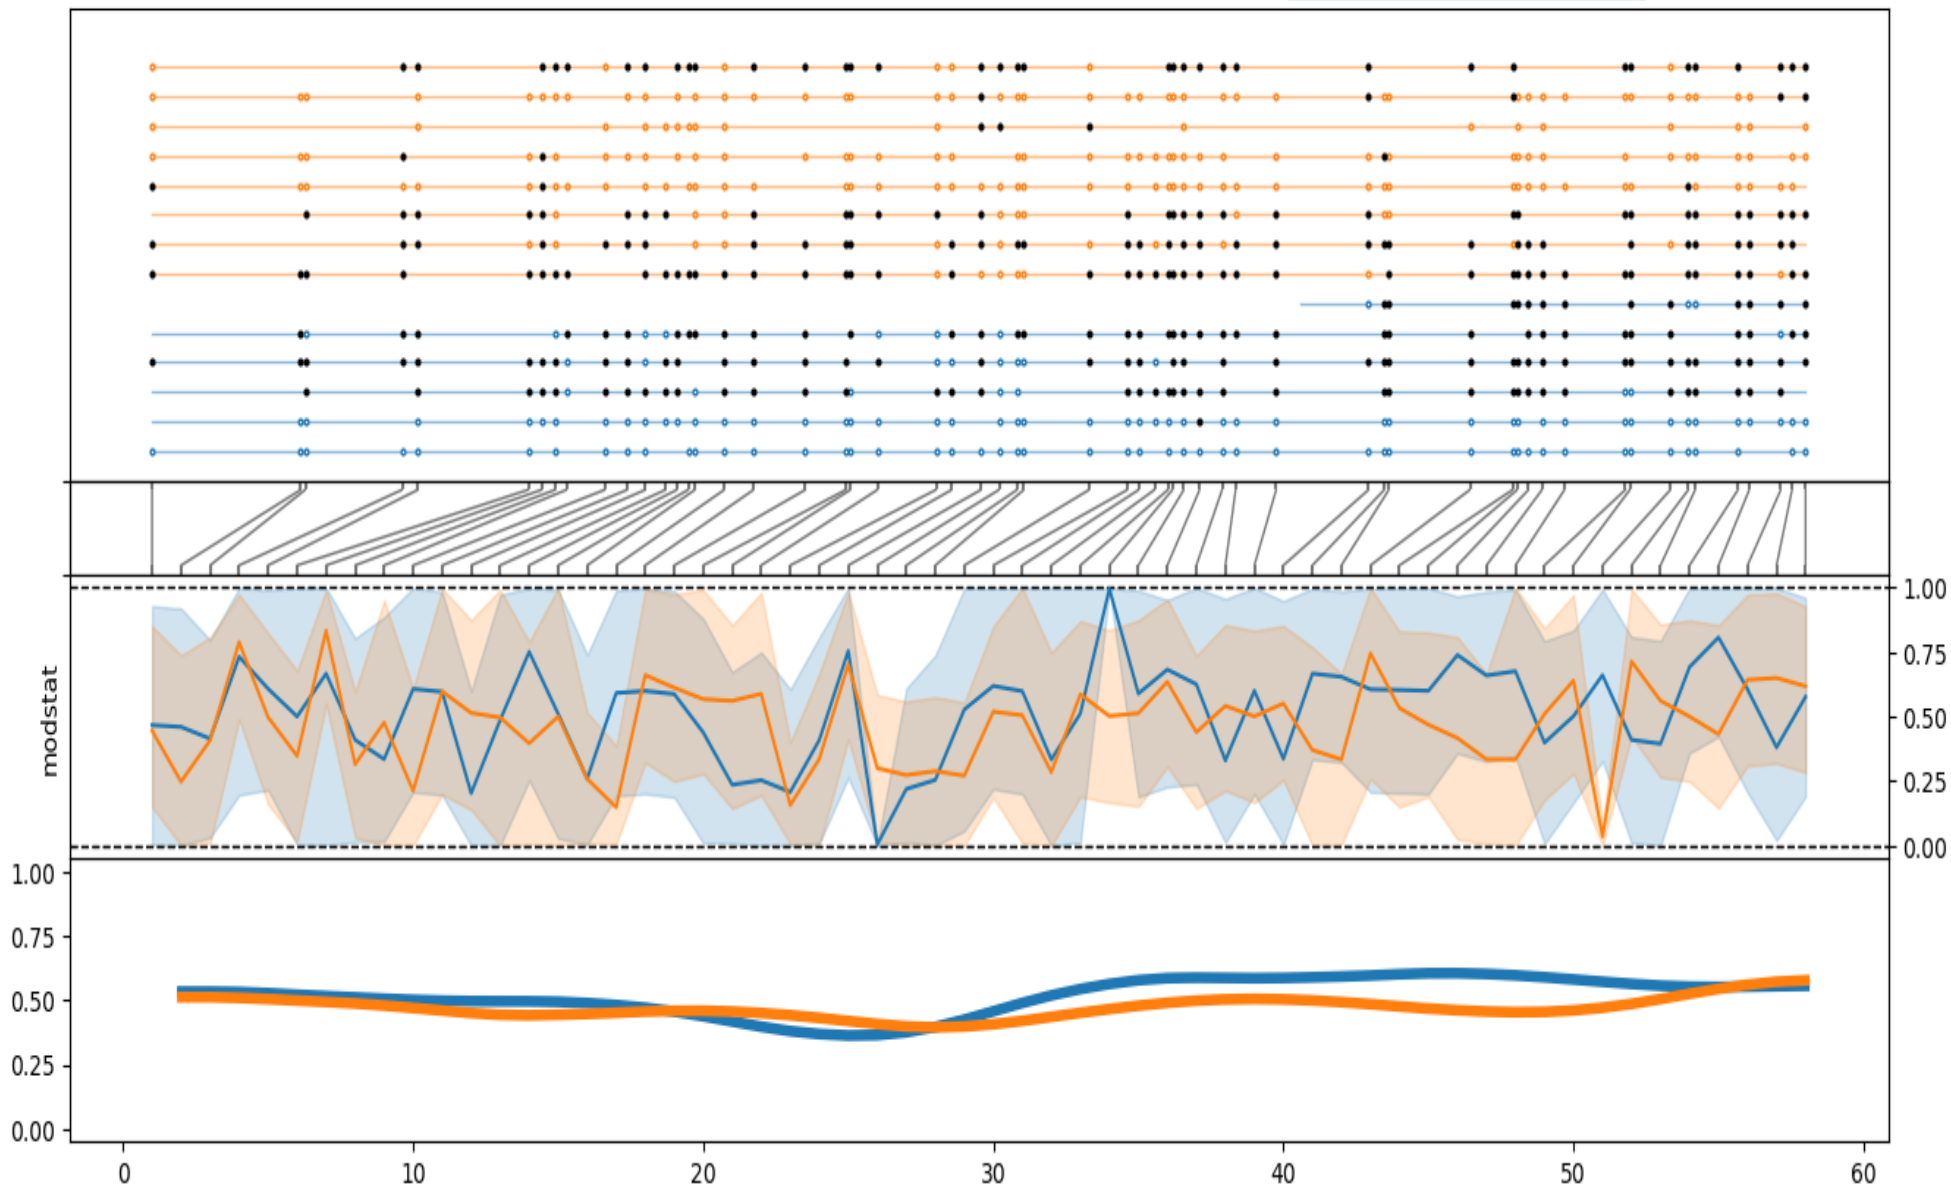



# EPI\_12\_hg38\_phased\_chrX\_67543761\_67546170

chr67543860 67544079 67544298 67544517 67544736 67544955 67545174 67545393 67545612 67545831 67546050 67546269

AR>>

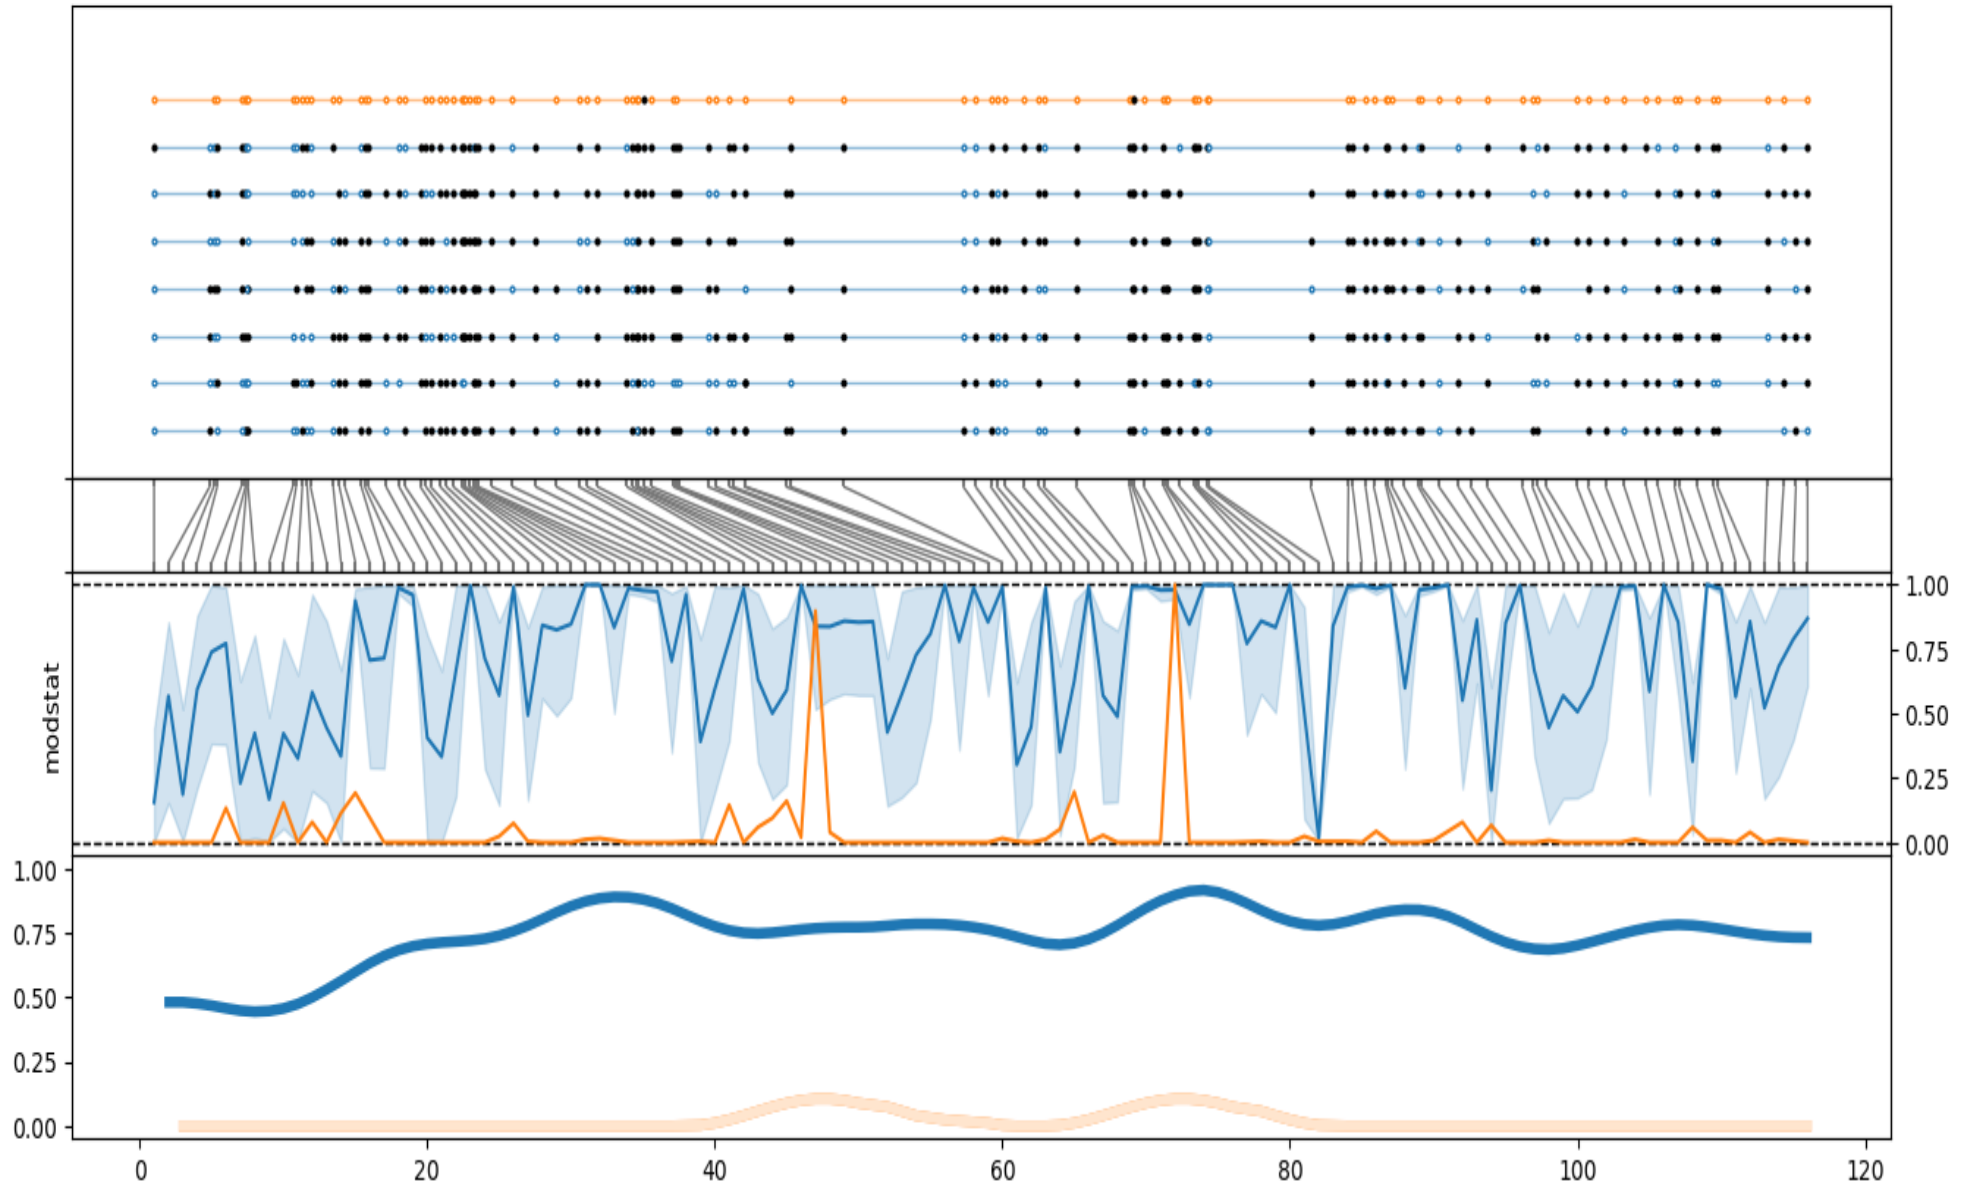

# EPI\_13\_buccalswab\_hg38\_phased\_chrx\_134372110\_134374891

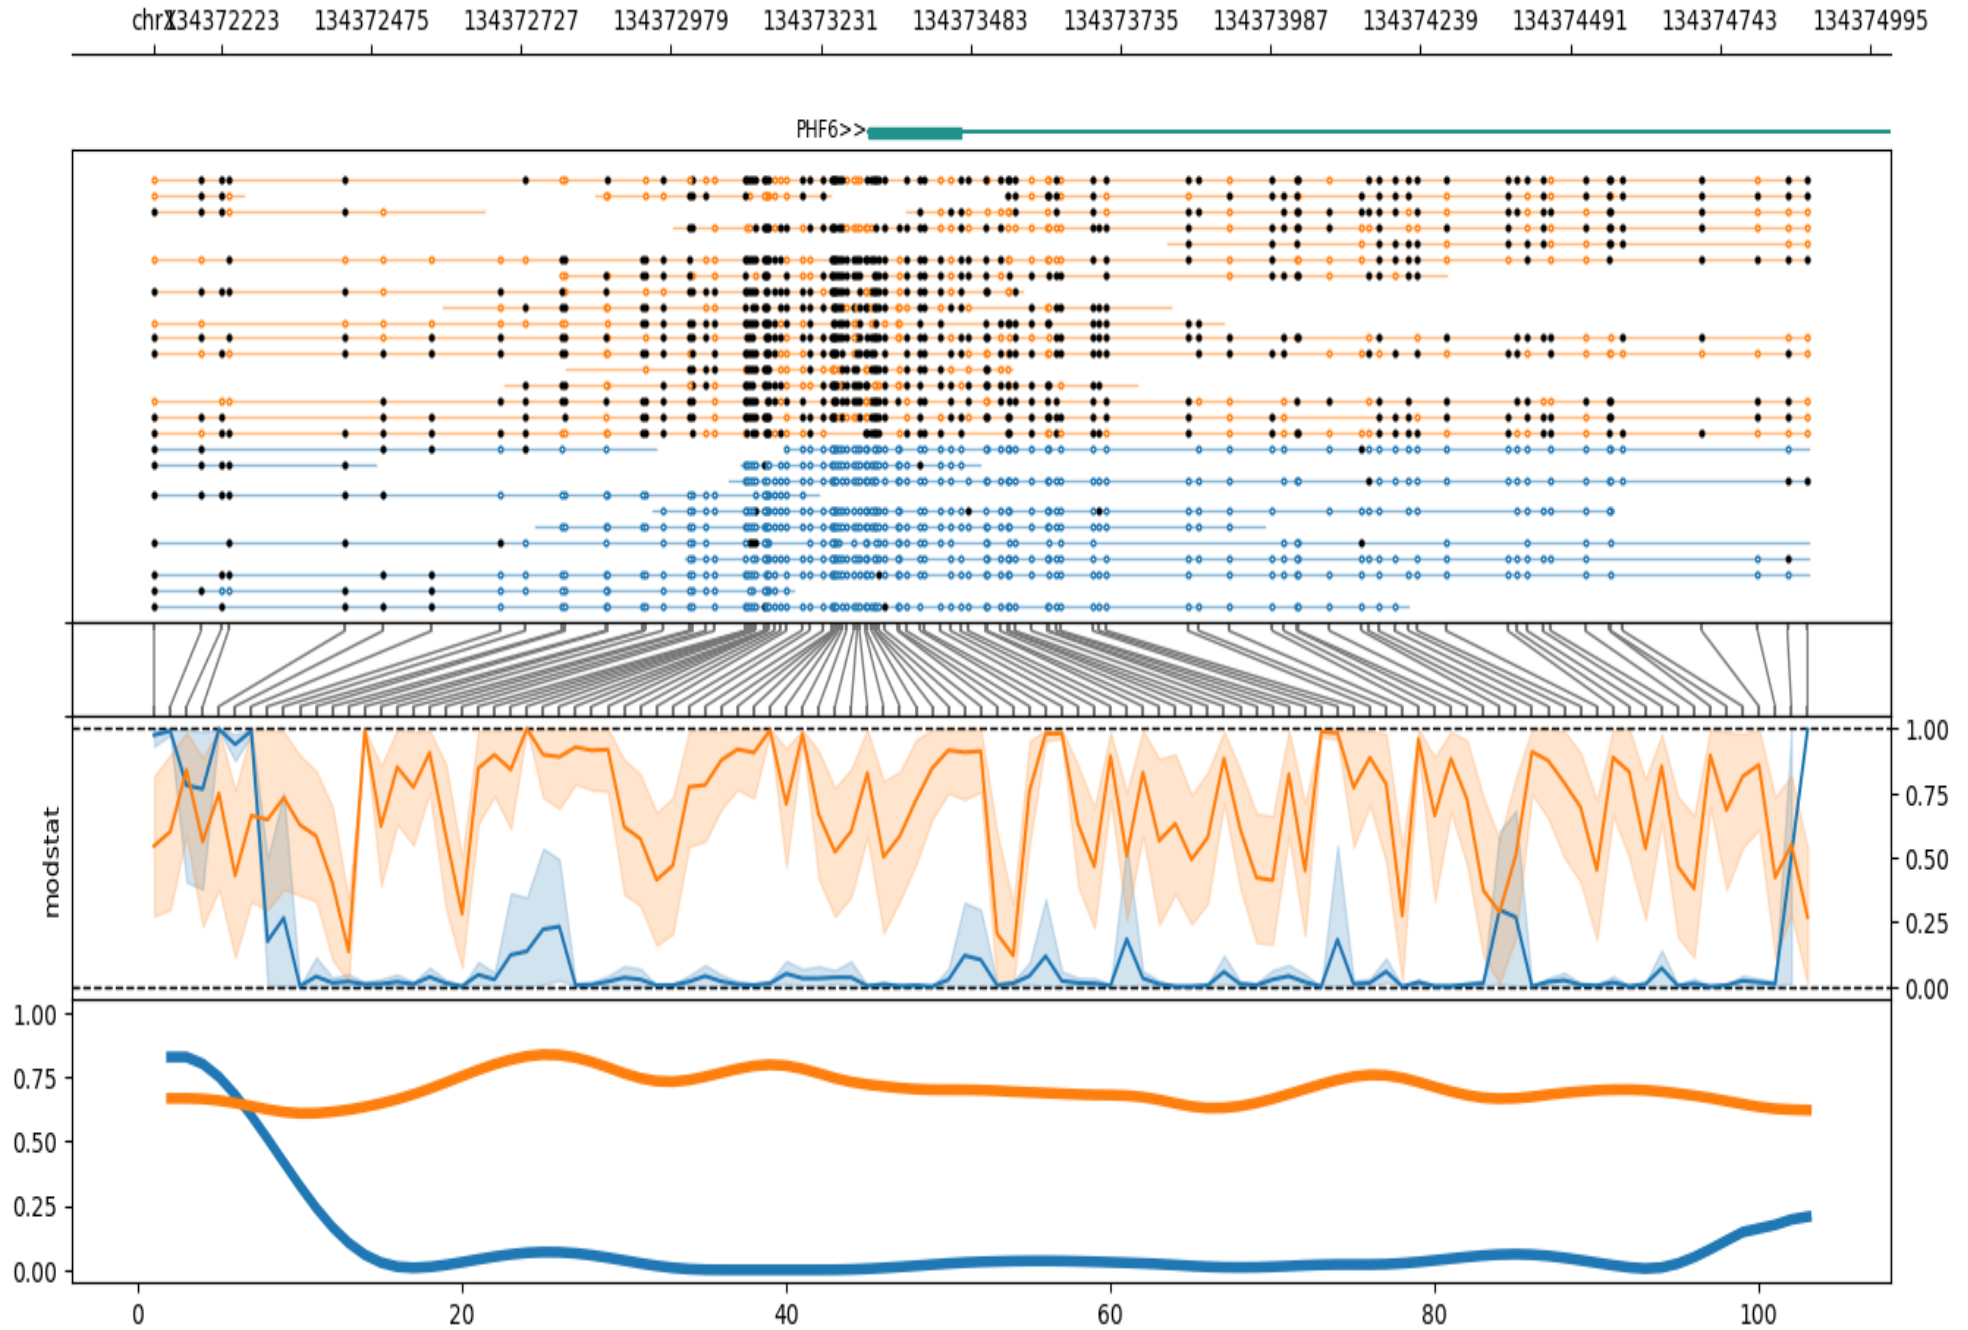

# EPI\_13\_buccalswab\_hg38\_phased\_chrx\_46836539\_46837273

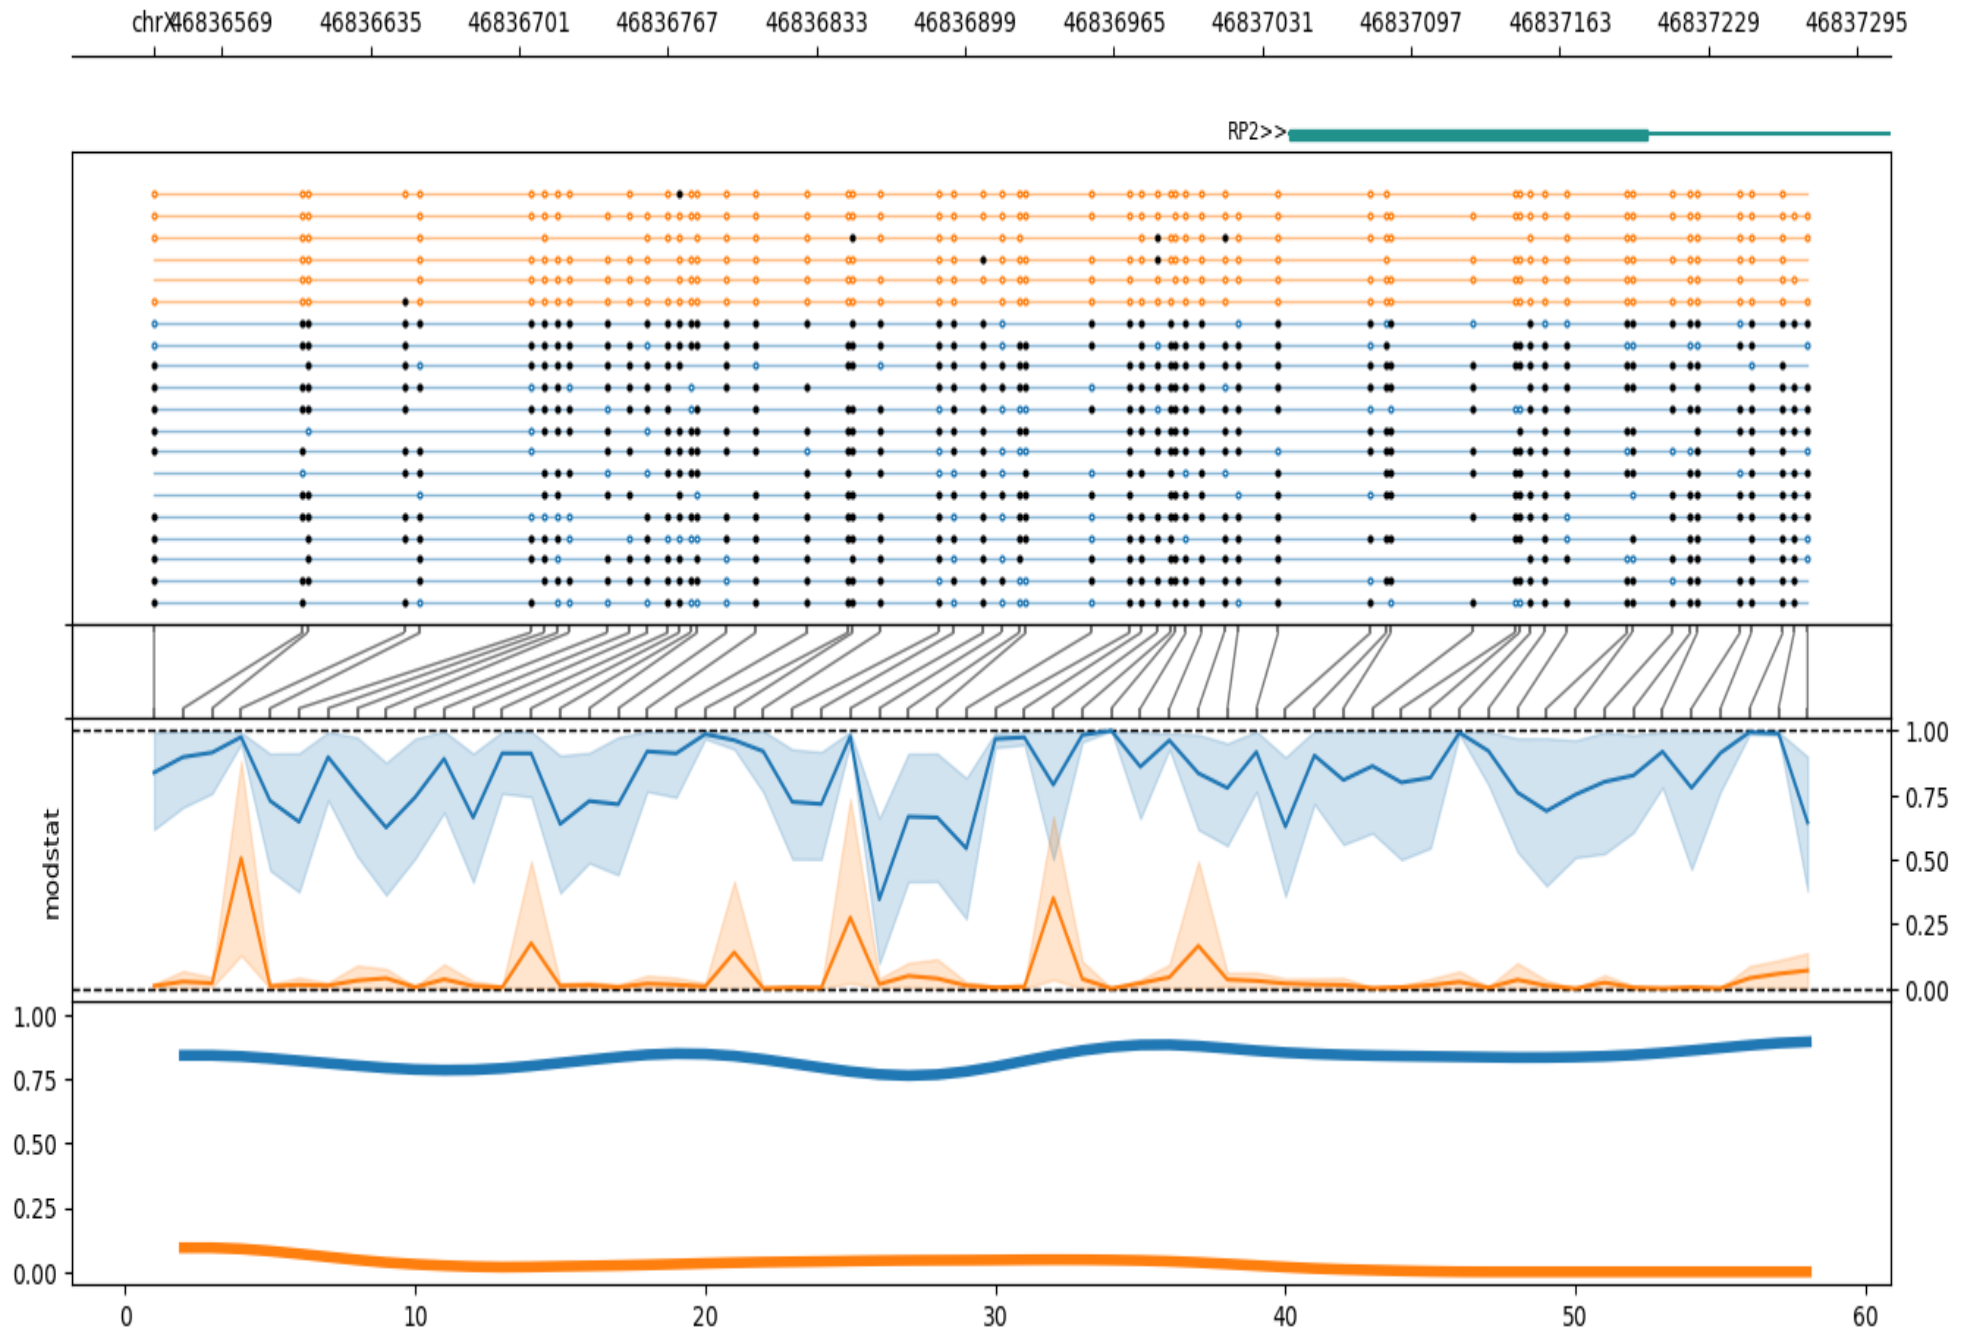

# EPI\_13\_buccalswab\_hg38\_phased\_chrx\_67543761\_67546170

chr67543860 67544079 67544298 67544517 67544736 67544955 67545174 67545393 67545612 67545831 67546050 67546269

AR>>

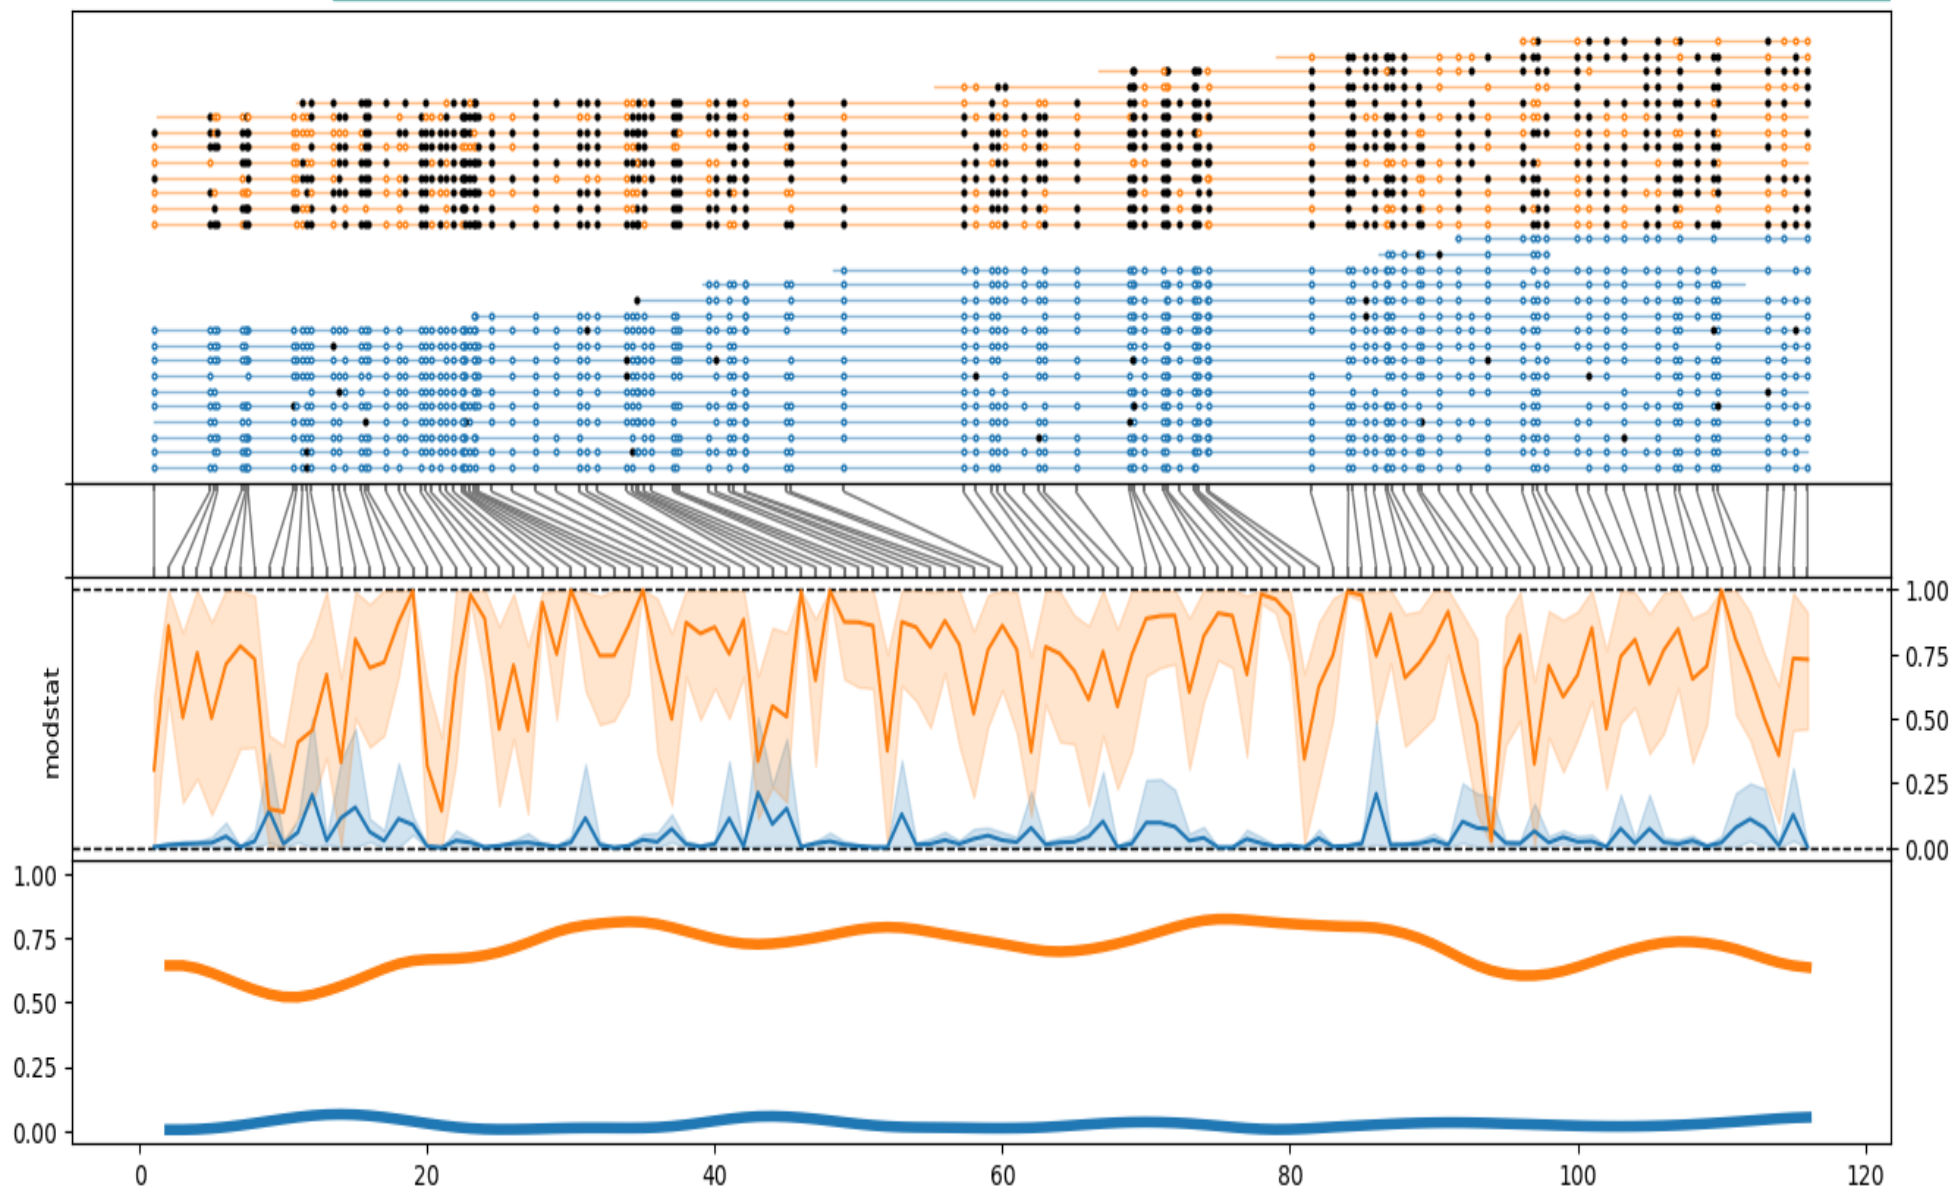



# EPI\_13\_hg38\_phased\_chr11\_1997509\_2003349

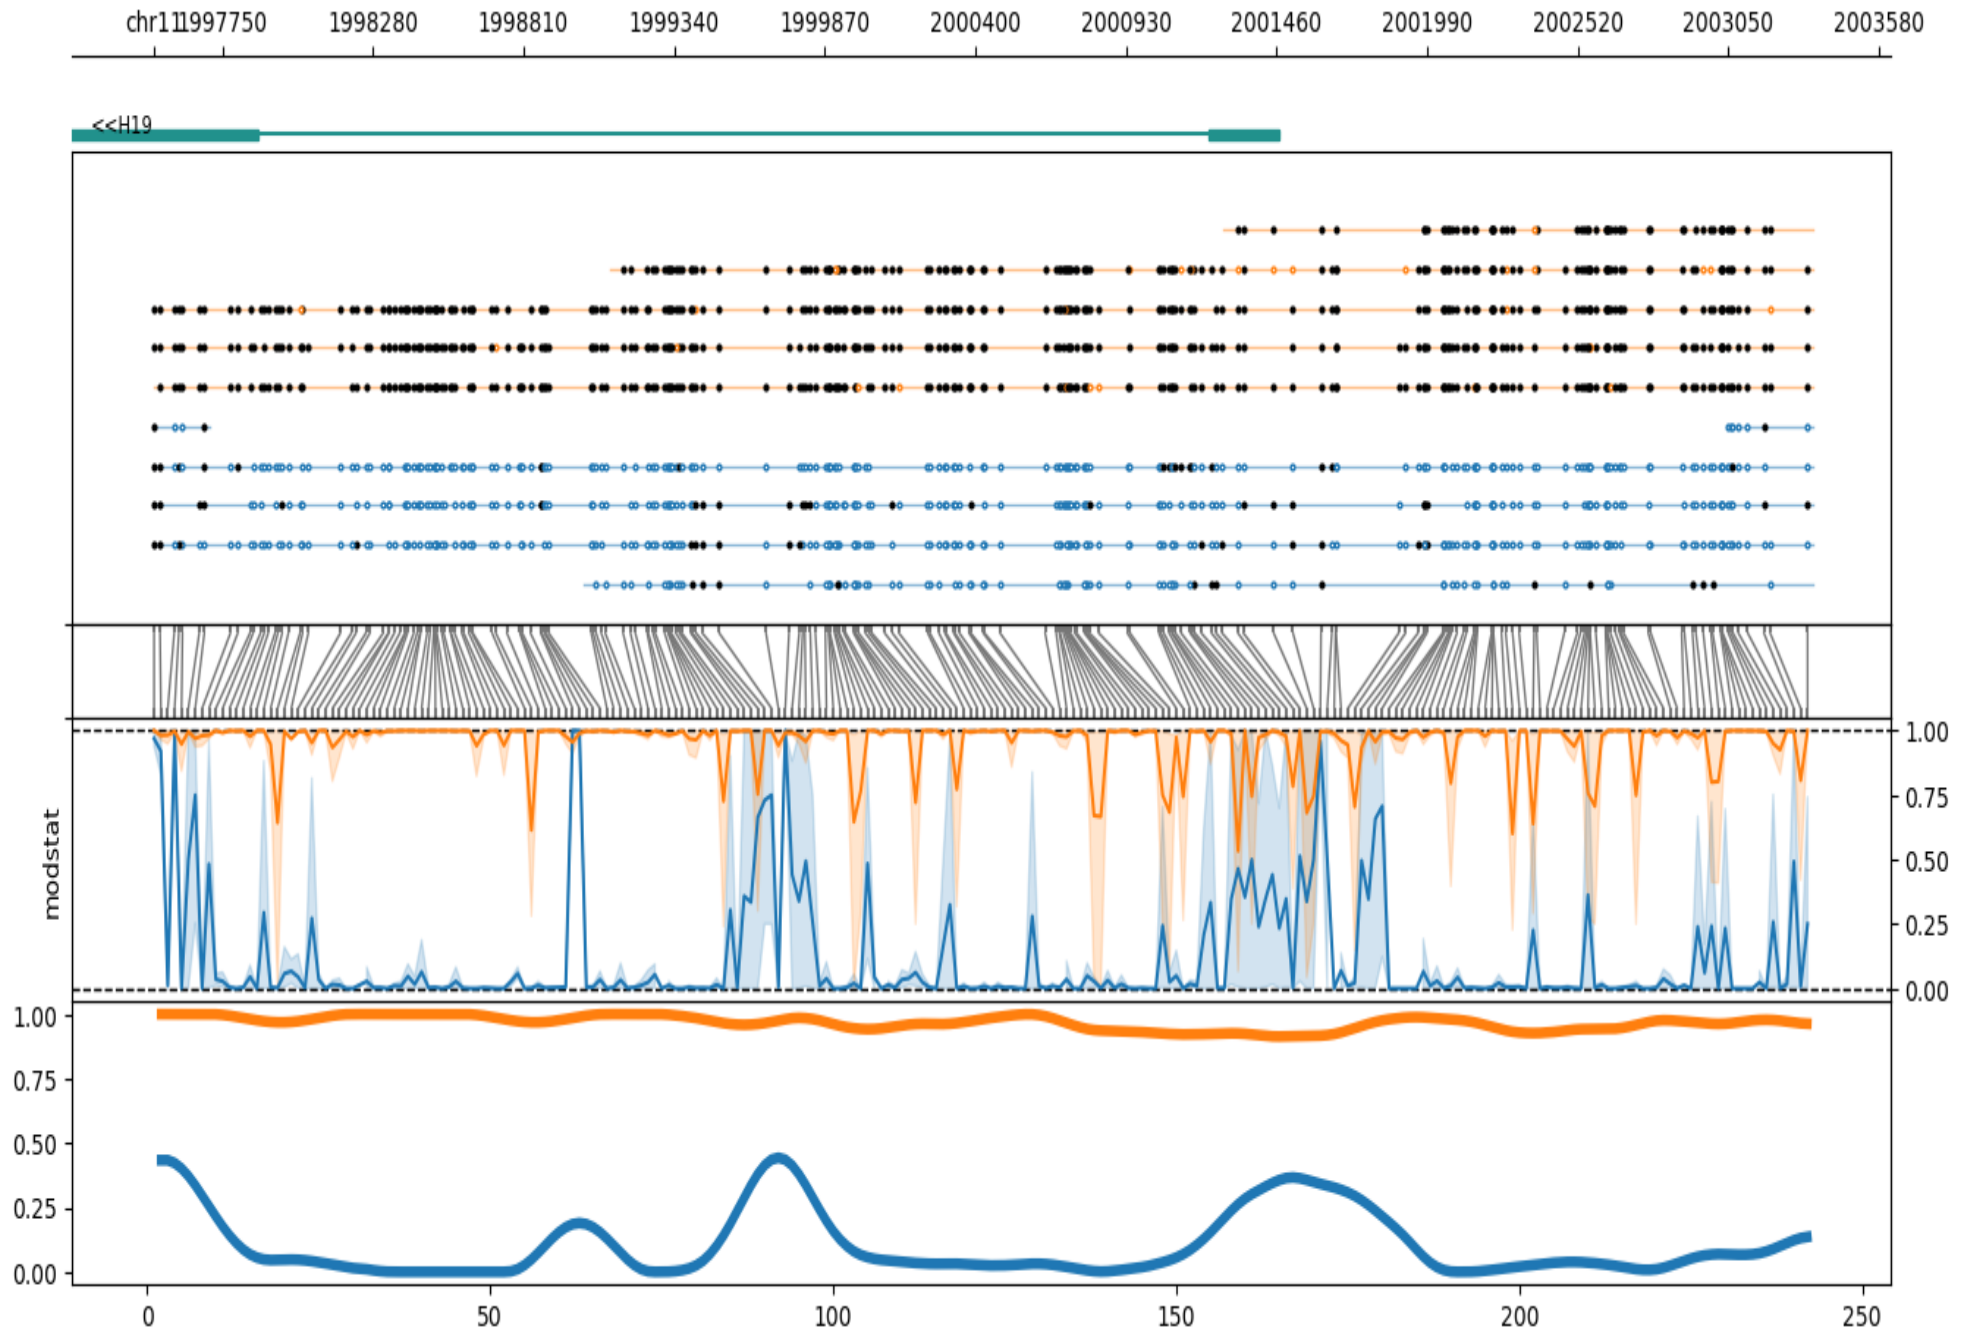

# EPI\_13\_hg38\_phased\_chr11\_2698155\_2701028

chr11:2698274 2698535 2698796 2699057 2699318 2699579 2699840 2700101 2700362 2700623 2700884 2701145

KCNQ1>>

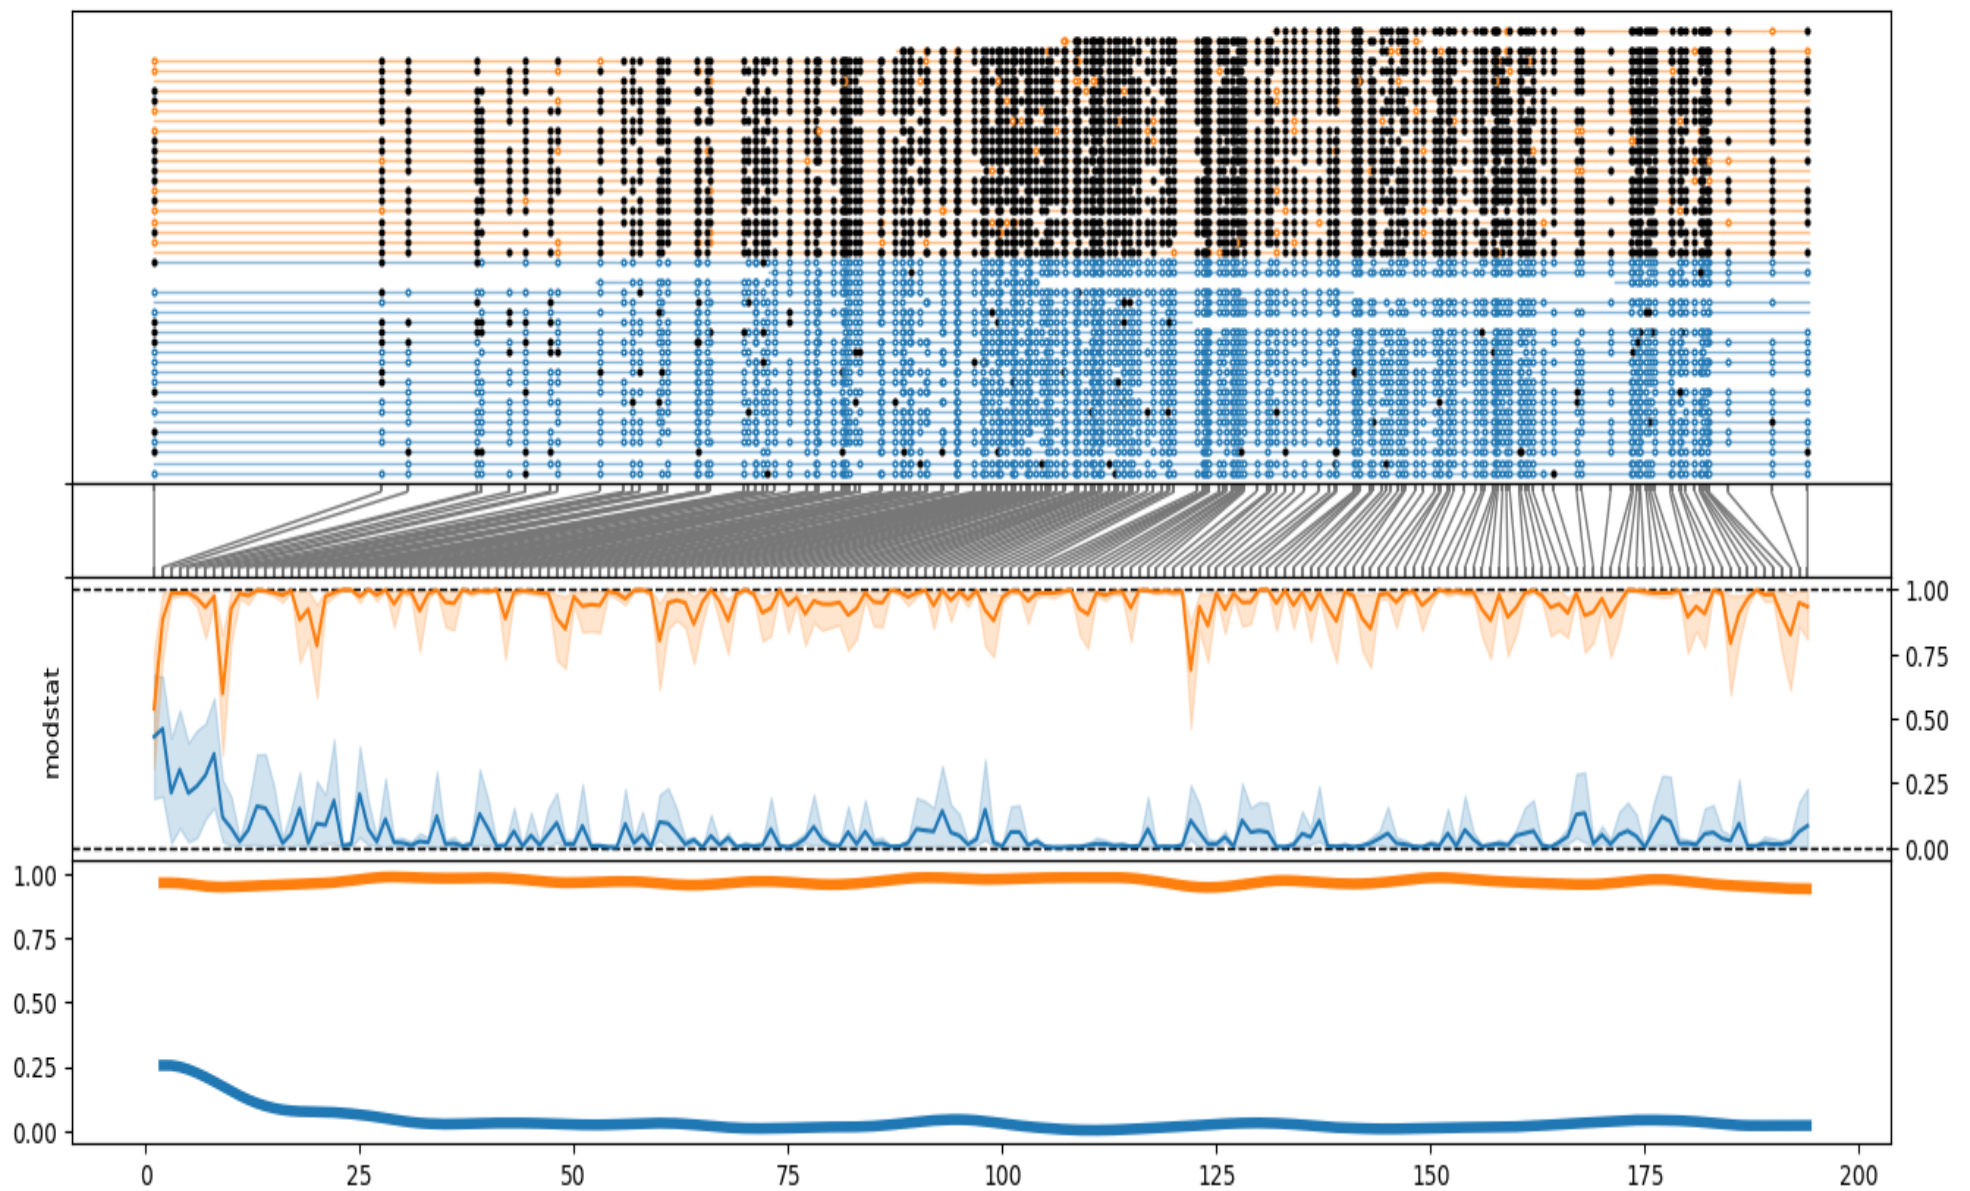

# EPI\_13\_hg38\_phased\_chrom14\_100824185\_100827640

chr14 100824328 100824642 100824956 100825270 100825584 100825898 100826212 100826526 100826840 100827154 100827468 100827782

MEG3>>

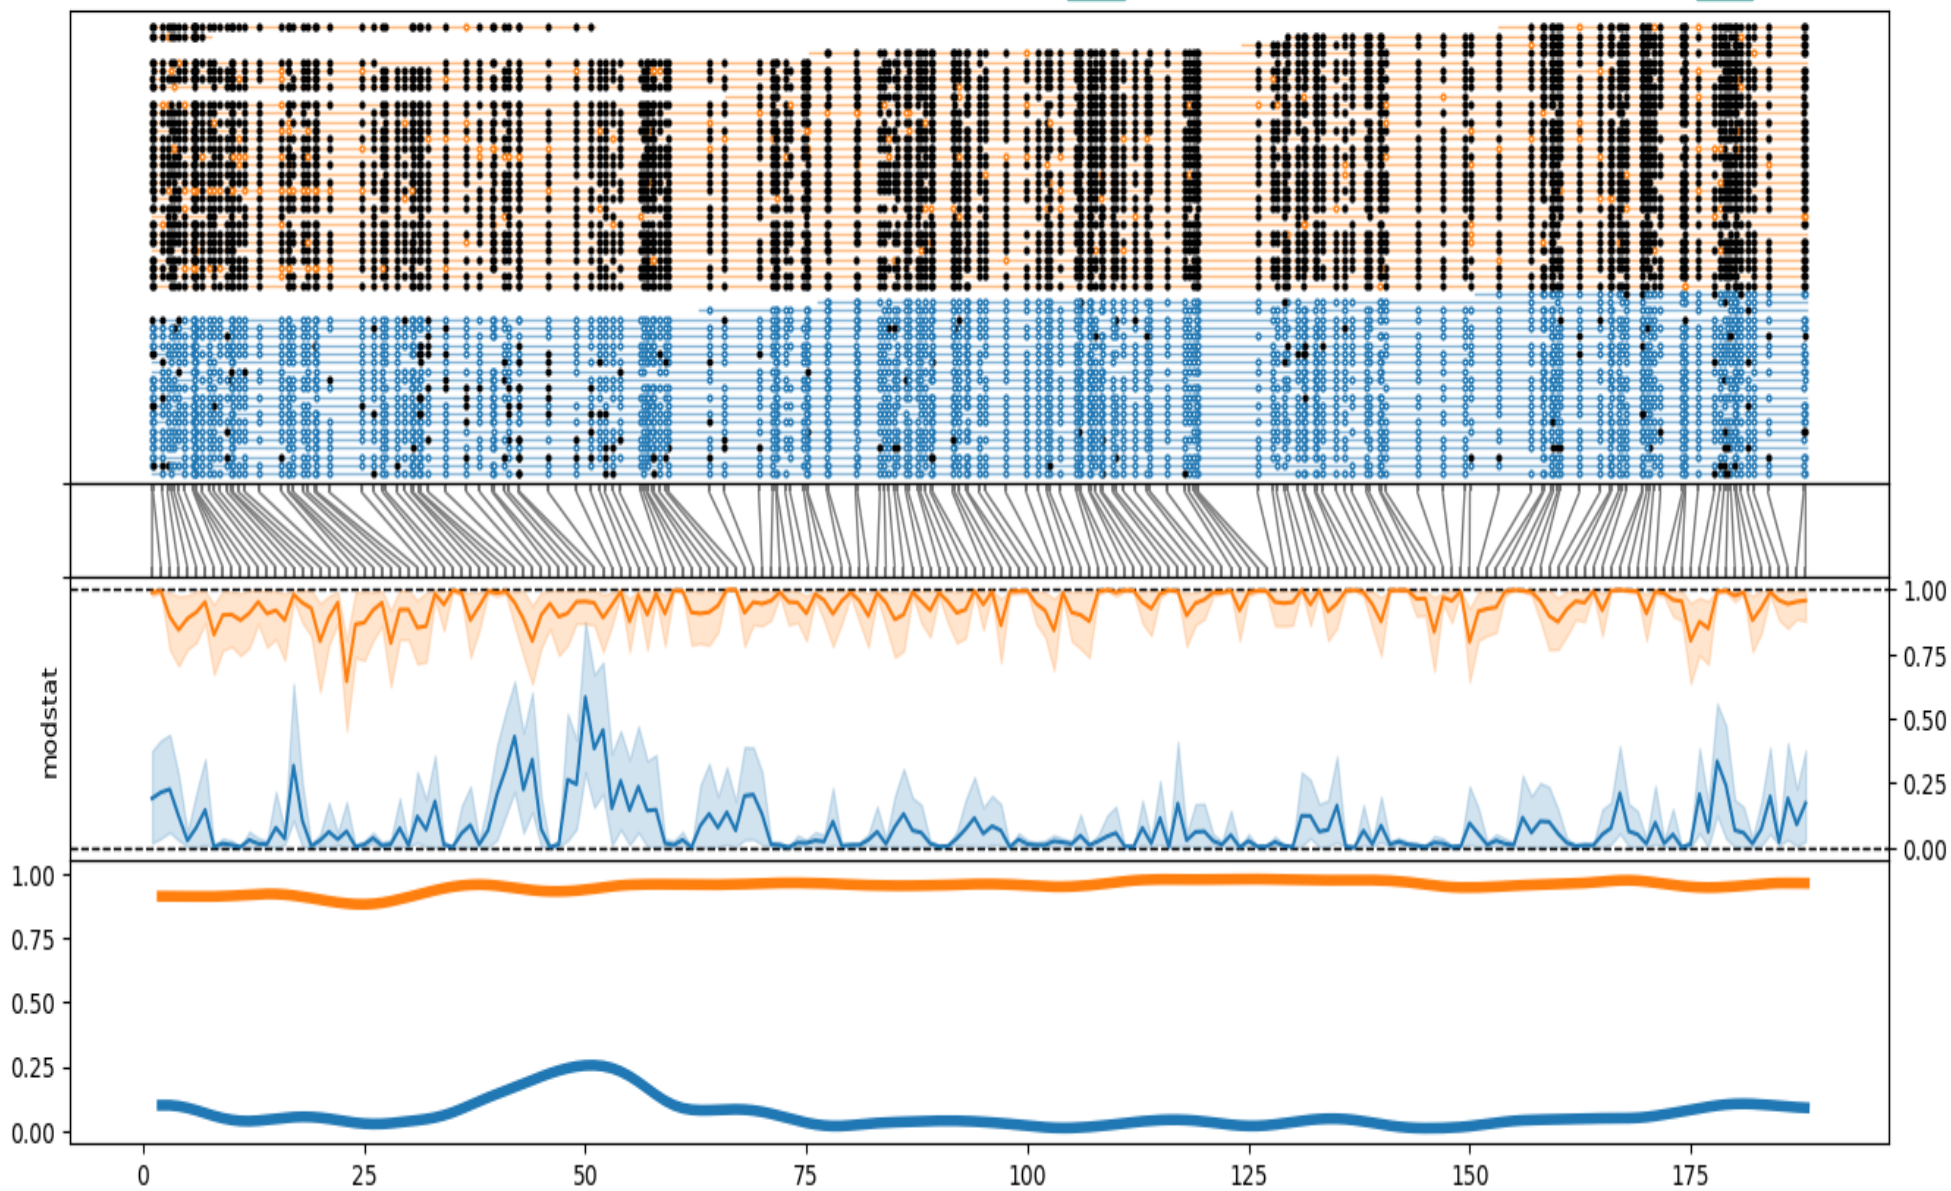



# EPI\_13\_hg38\_phased\_chr14\_100904325\_100905081

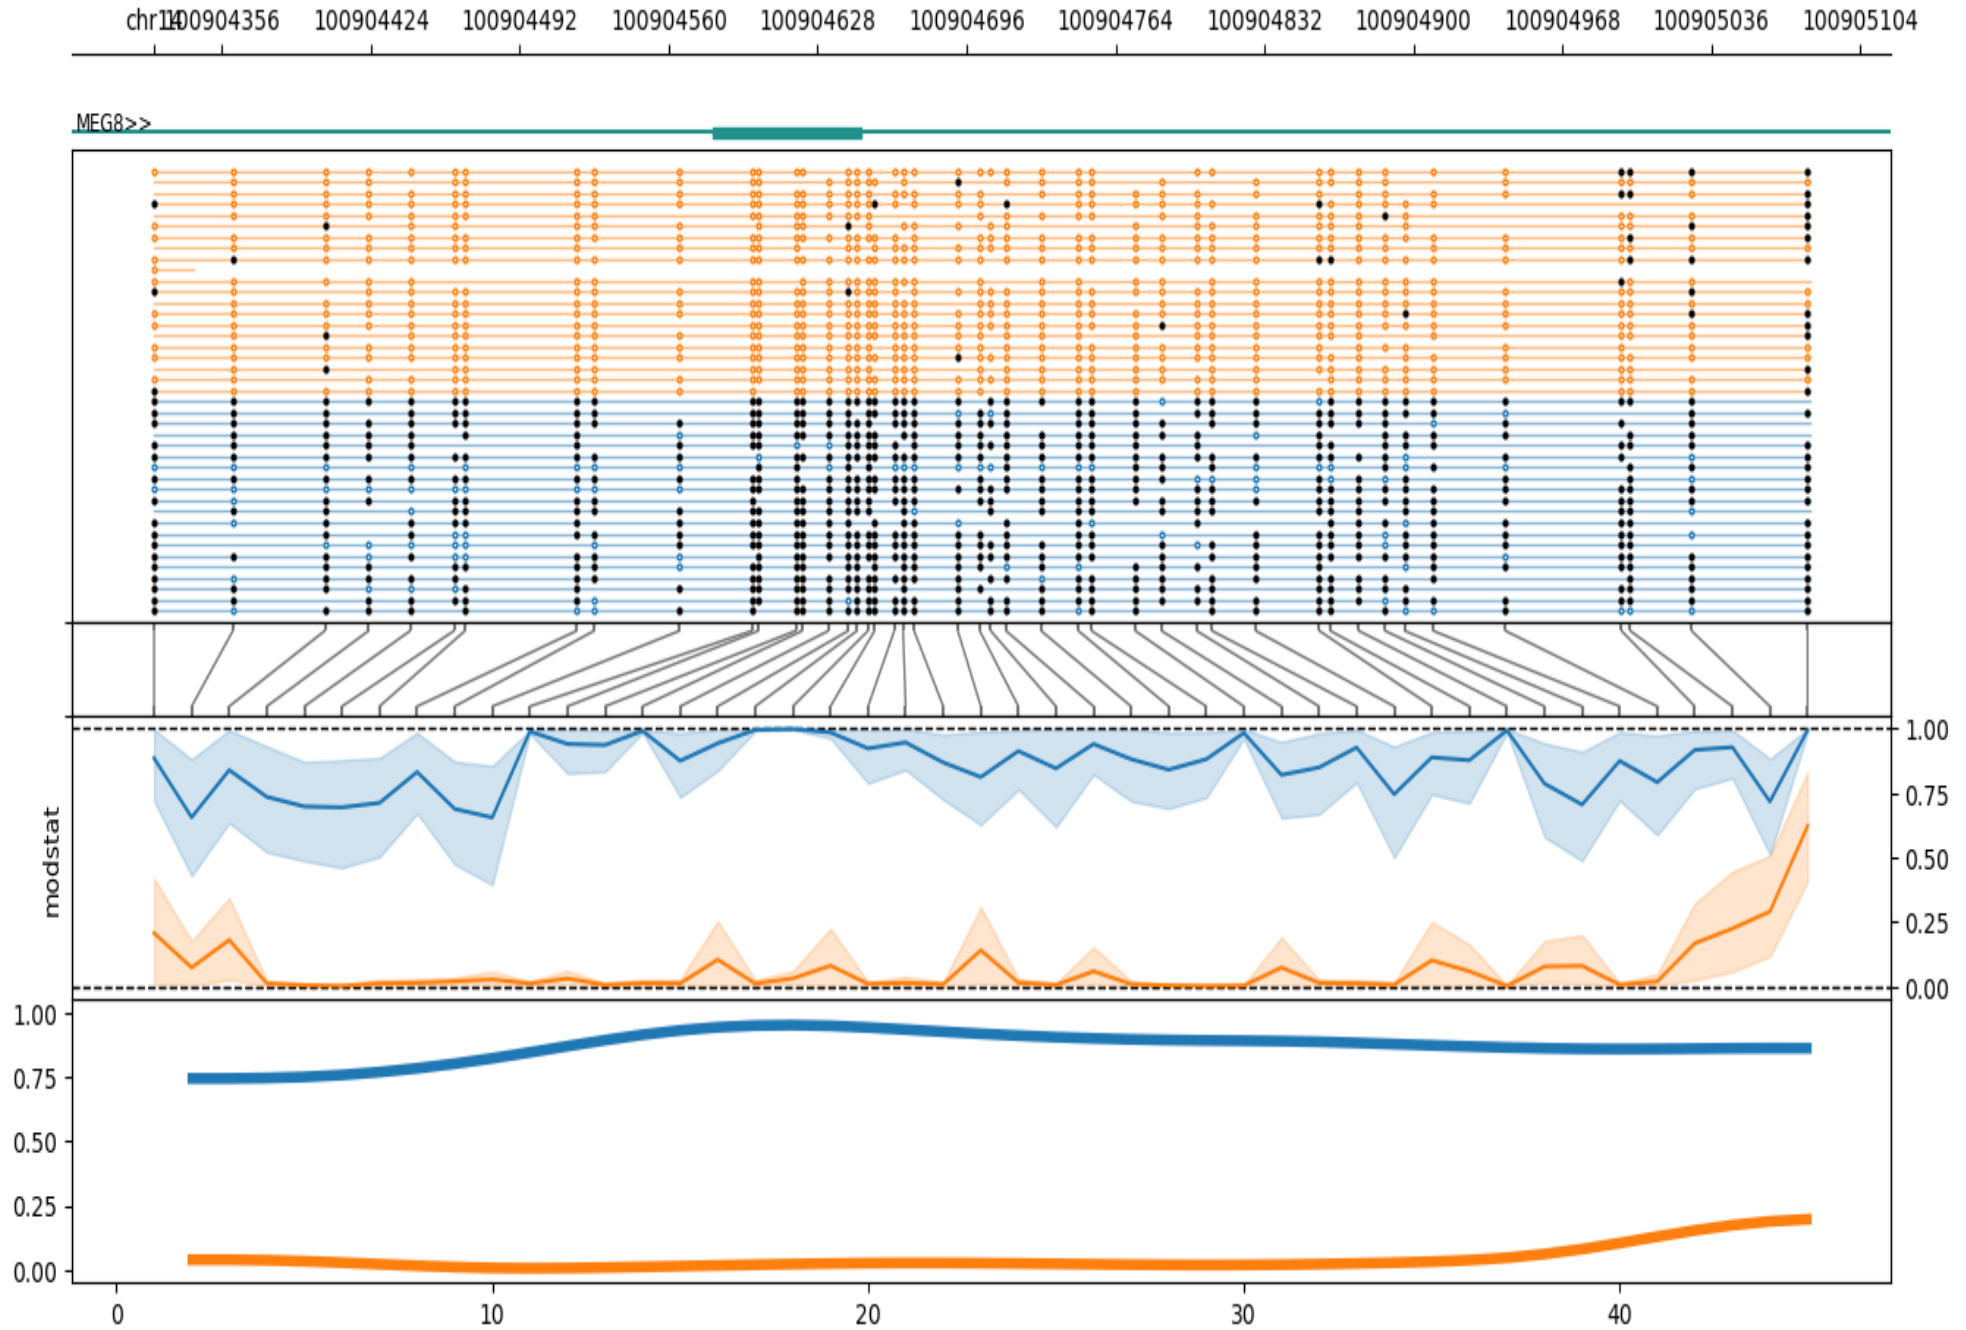



# EPI\_13\_hg38\_phased\_chr15\_23647178\_23648424

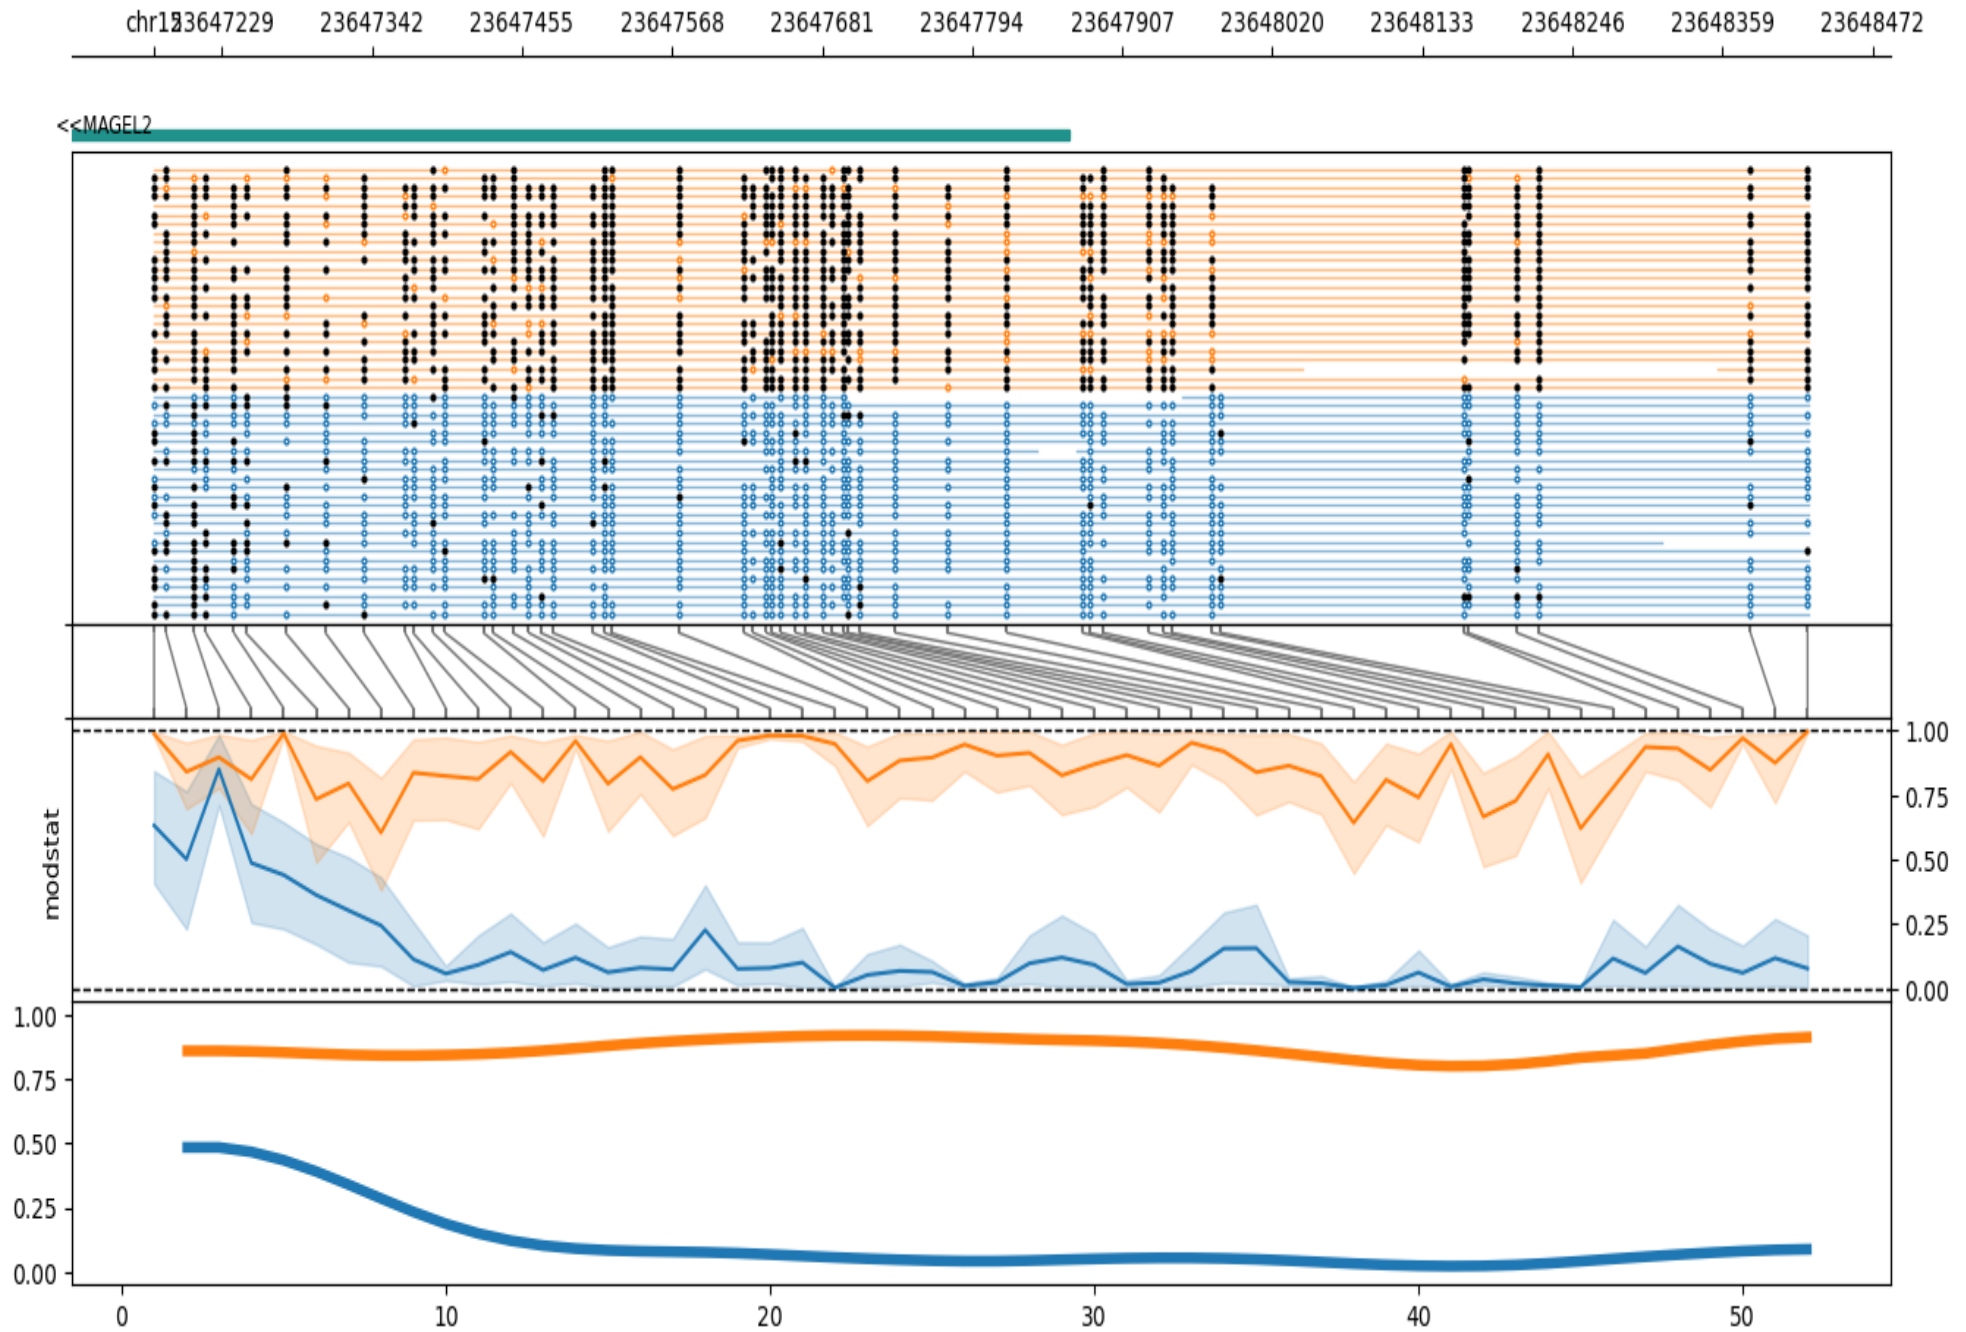

# EPI\_13\_hg38\_phased\_chromosome15\_24954564\_24956828

chr15 24954657 24954862 24955067 24955272 24955477 24955682 24955887 24956092 24956297 24956502 24956707 24956912

SNRPN>>

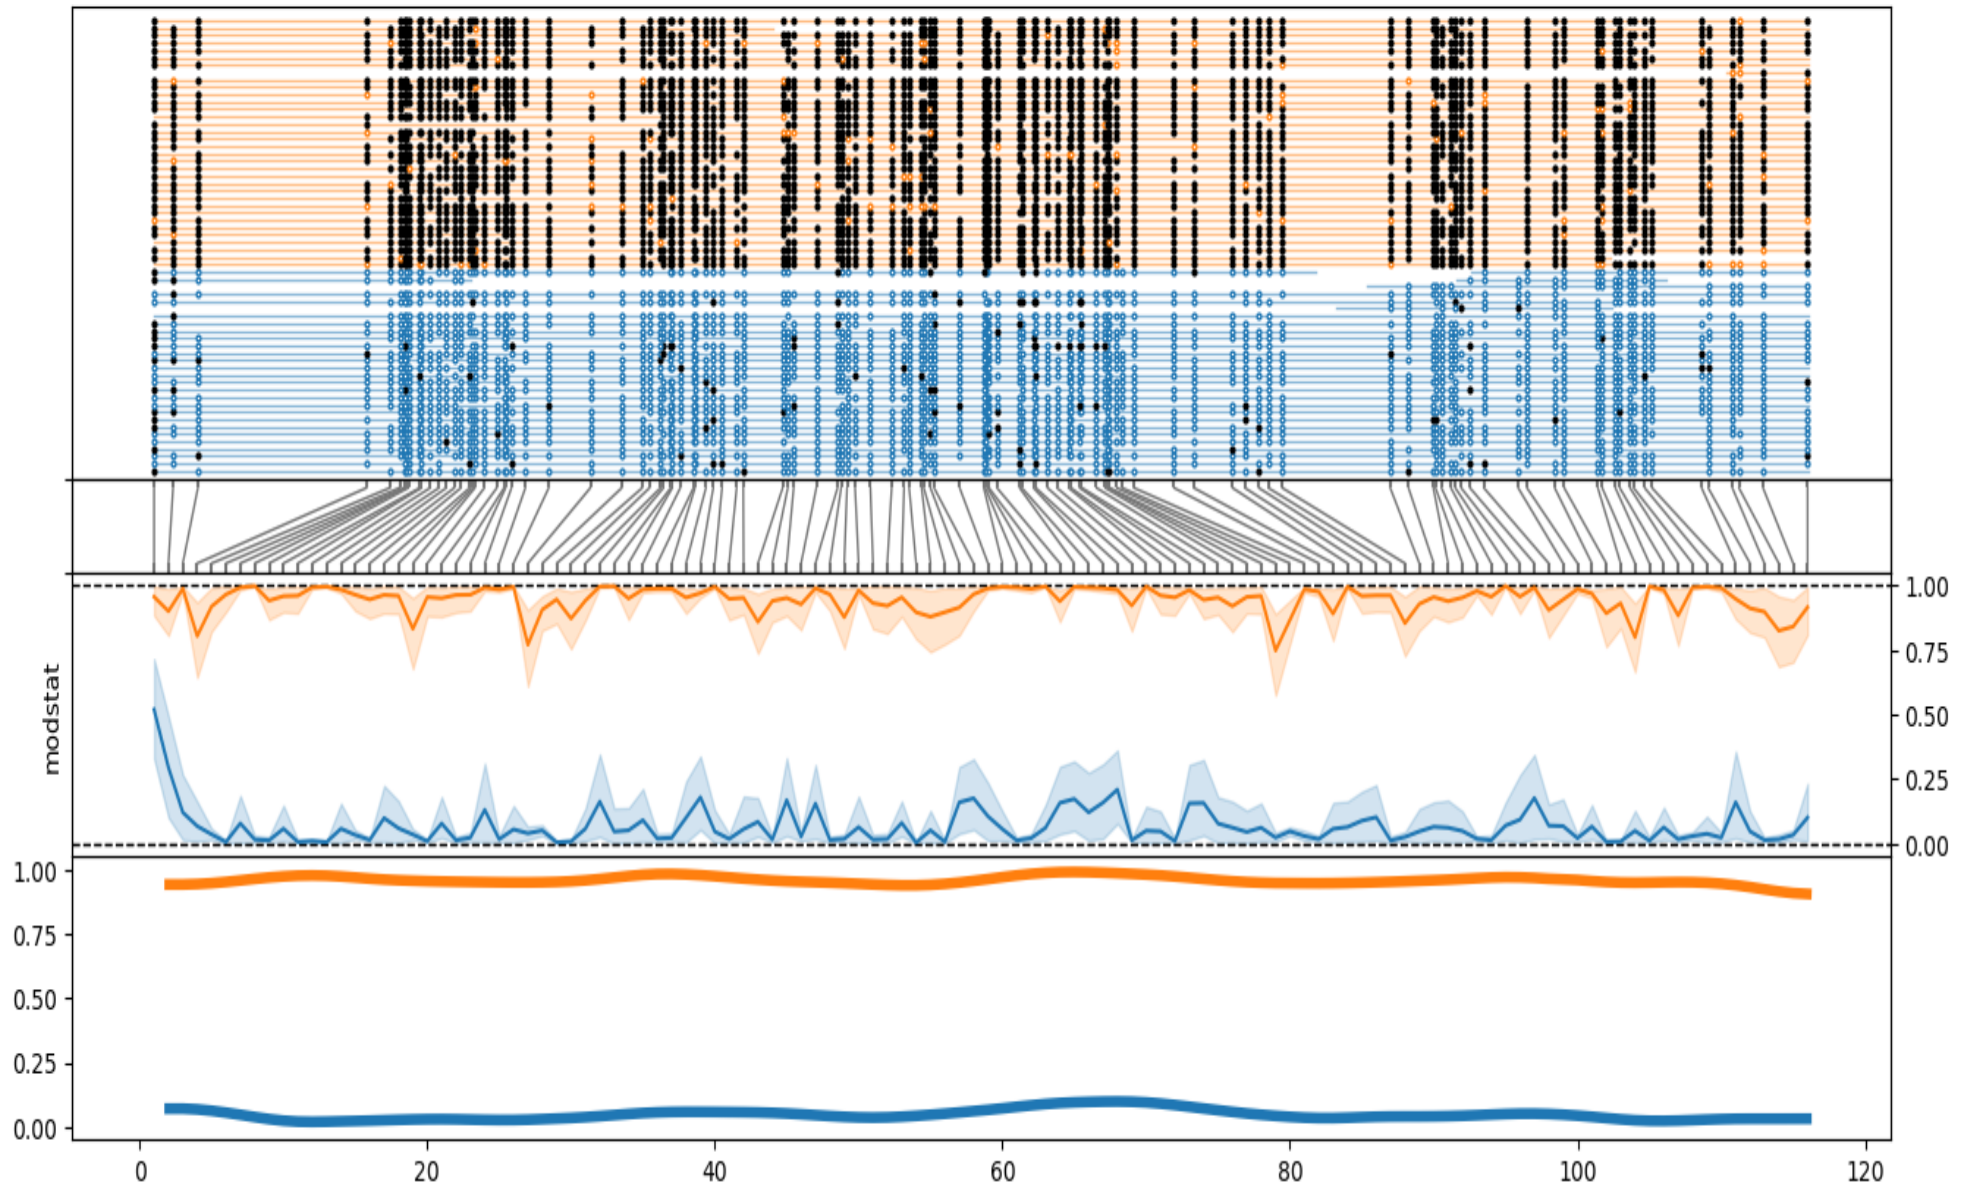

# EPI\_13\_hg38\_phased\_chrX\_134372110\_134374891

chrX 134372223 134372475 134372727 134372979 134373231 134373483 134373735 134373987 134374239 134374491 134374743 134374995

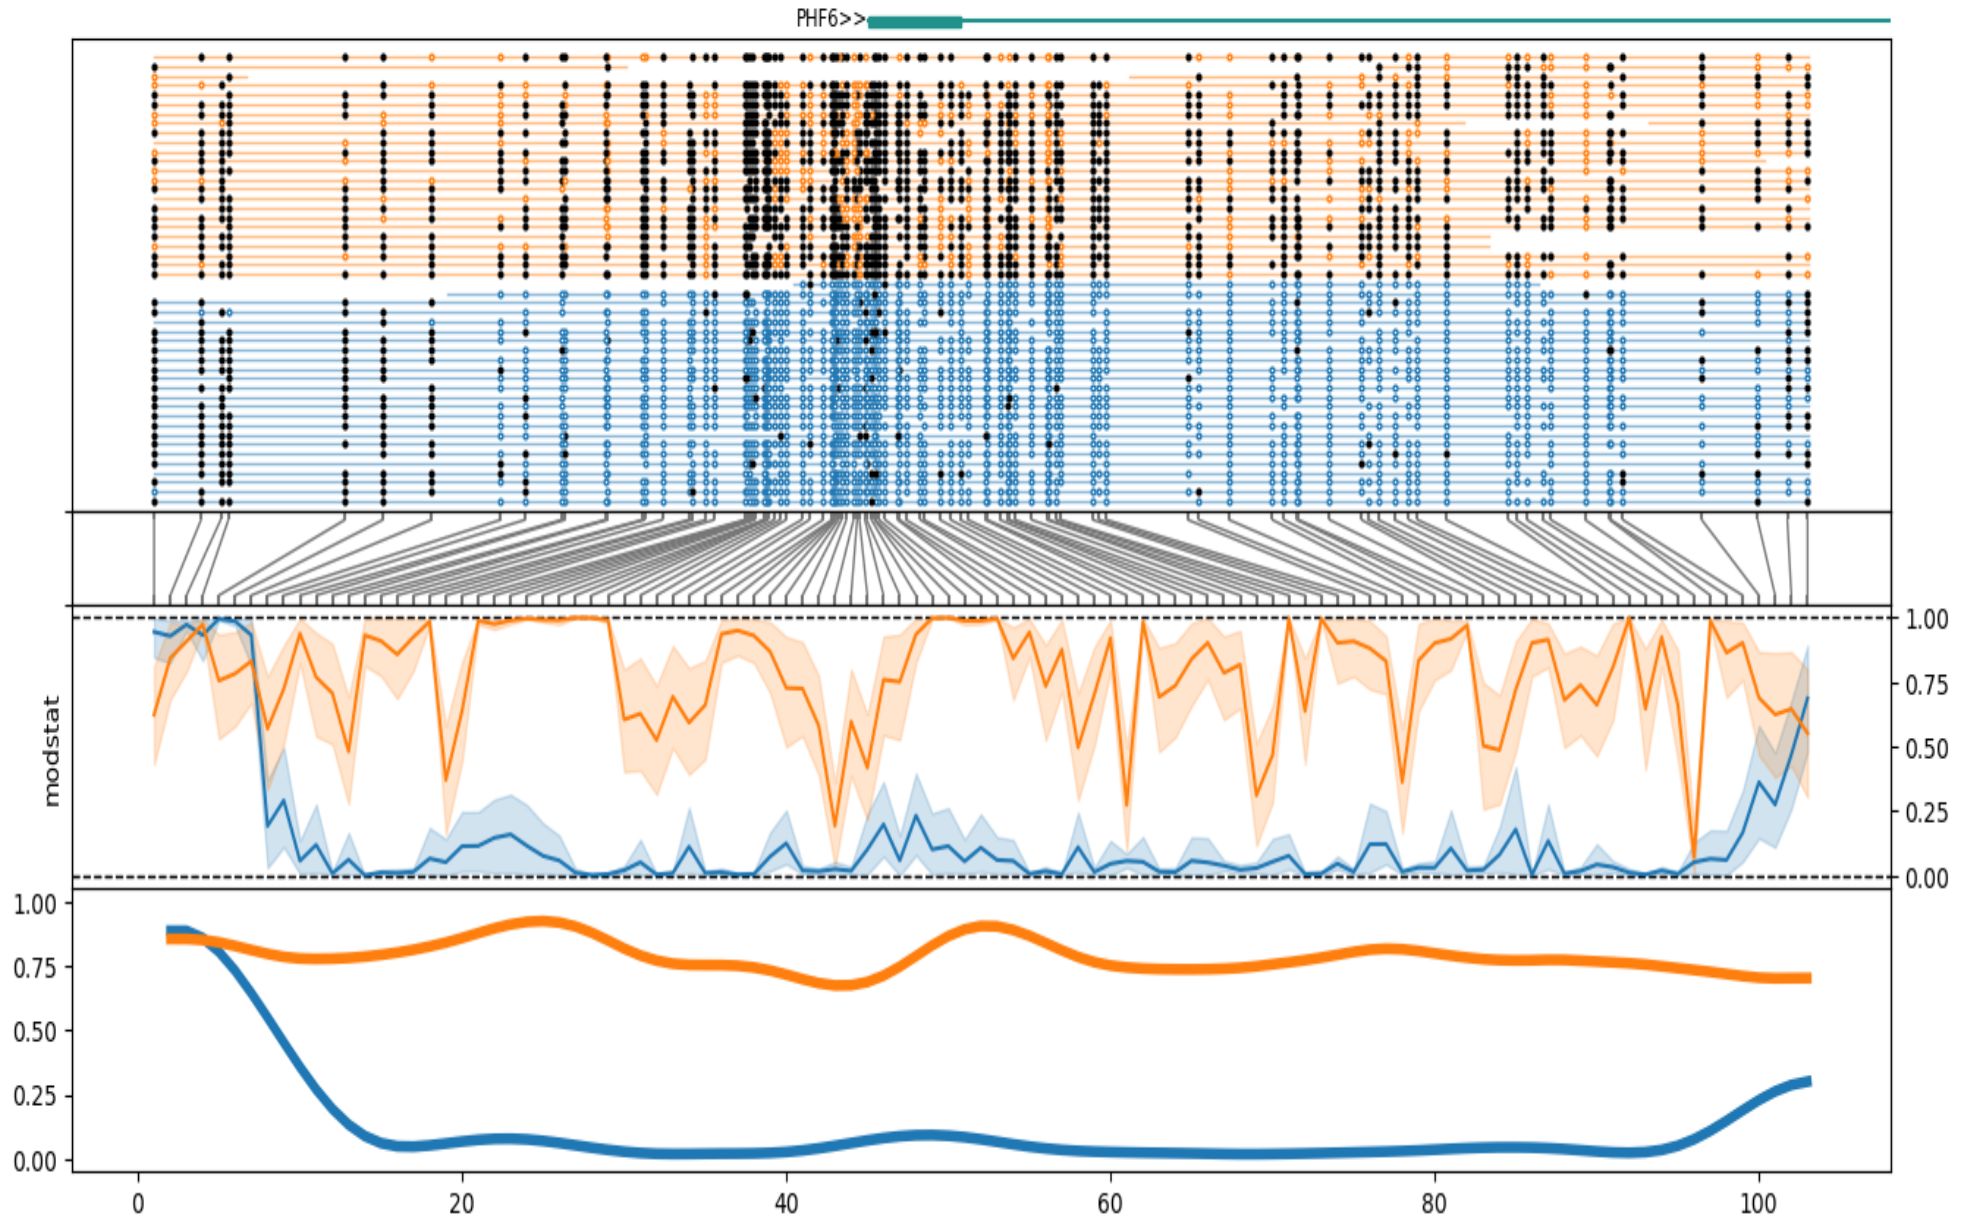



# EPI\_13\_hg38\_phased\_chrX\_46836539\_46837273

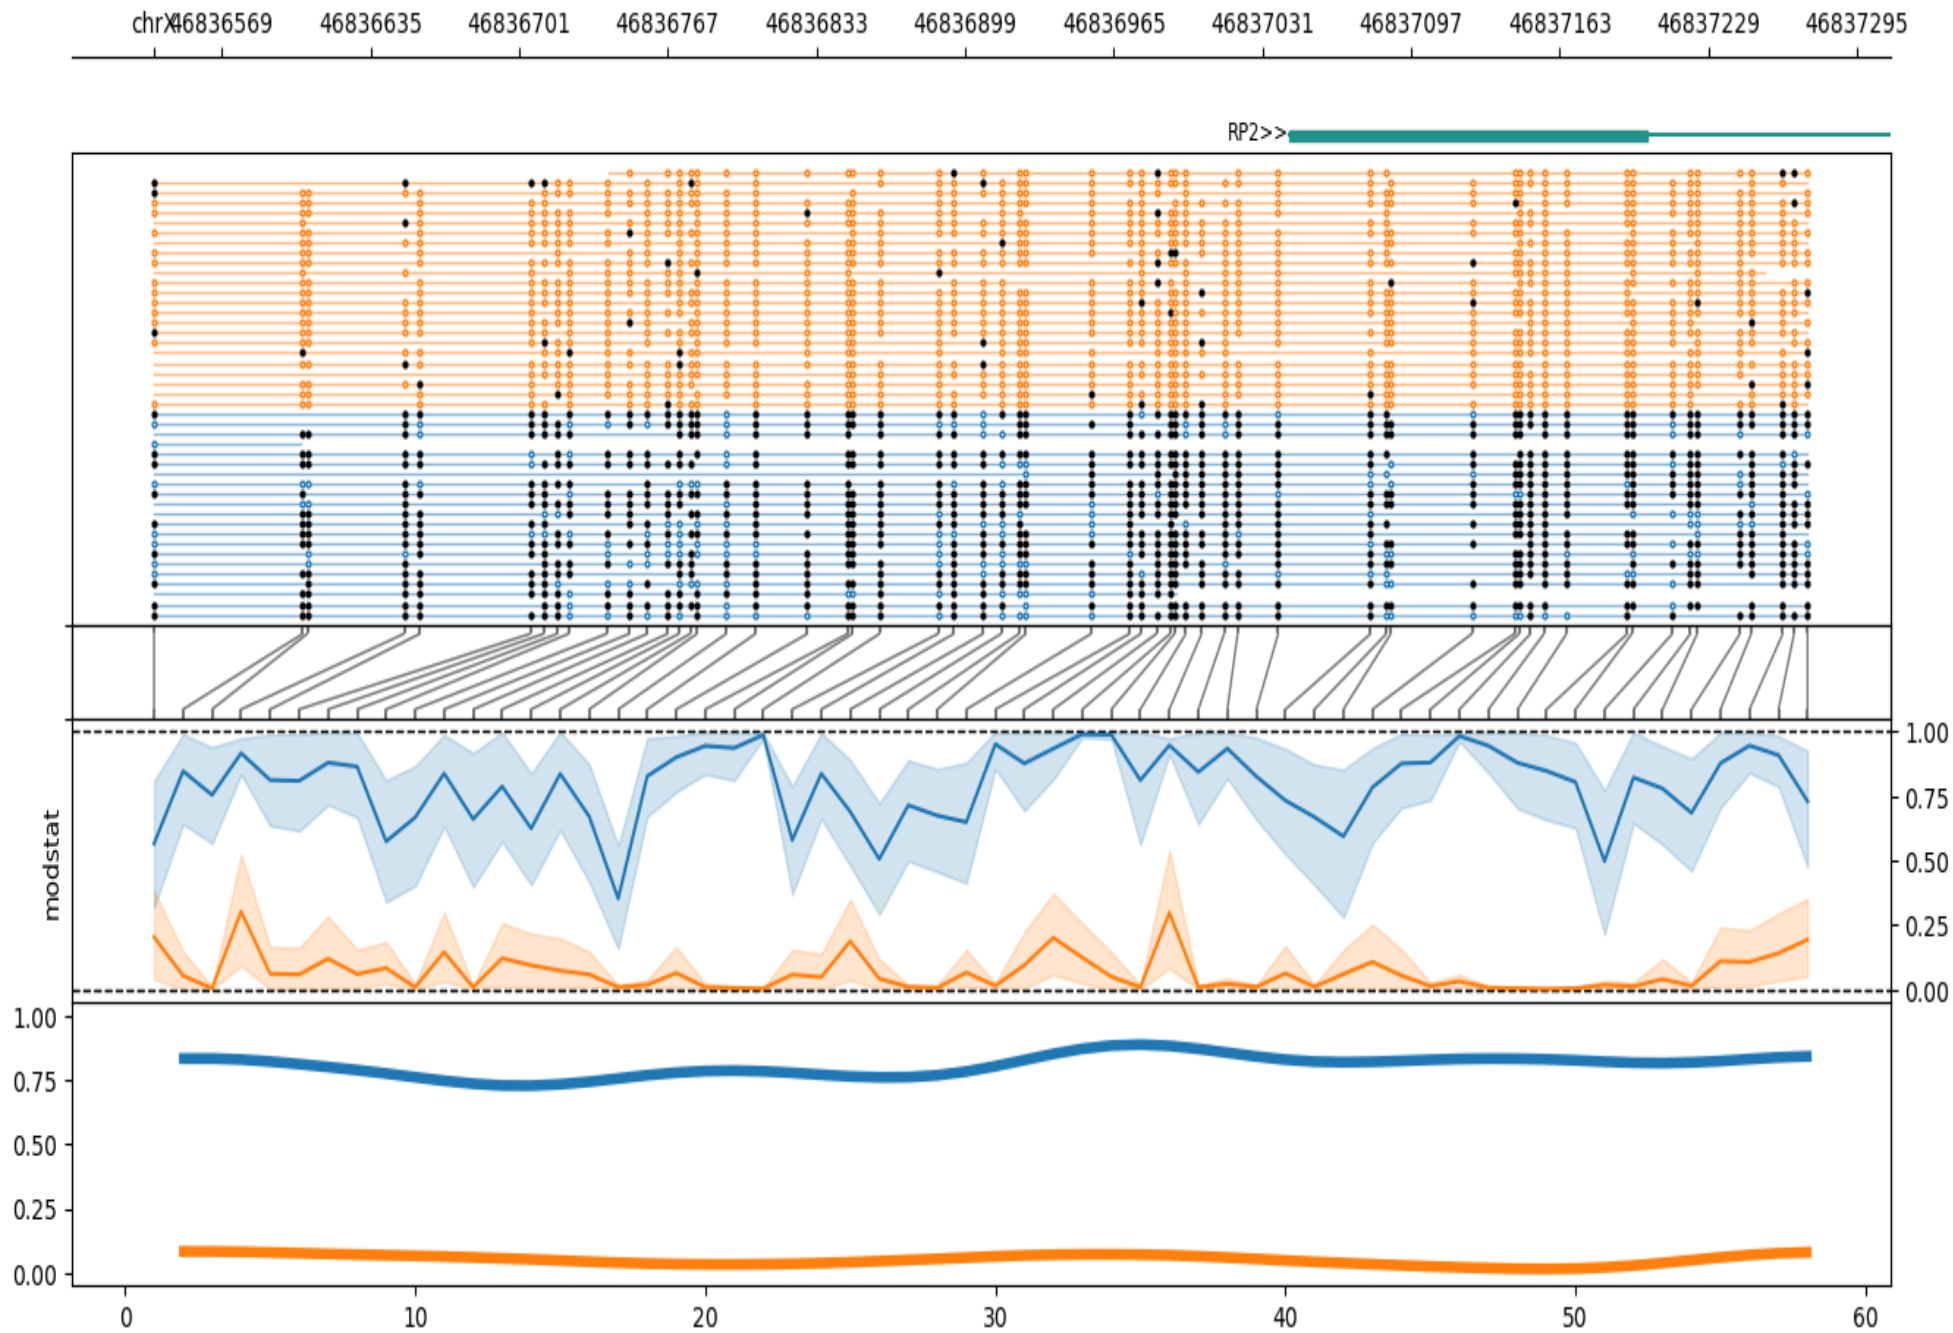



# EPI\_13\_hg38\_phased\_chrX\_67543761\_67546170

chr67543860 67544079 67544298 67544517 67544736 67544955 67545174 67545393 67545612 67545831 67546050 67546269

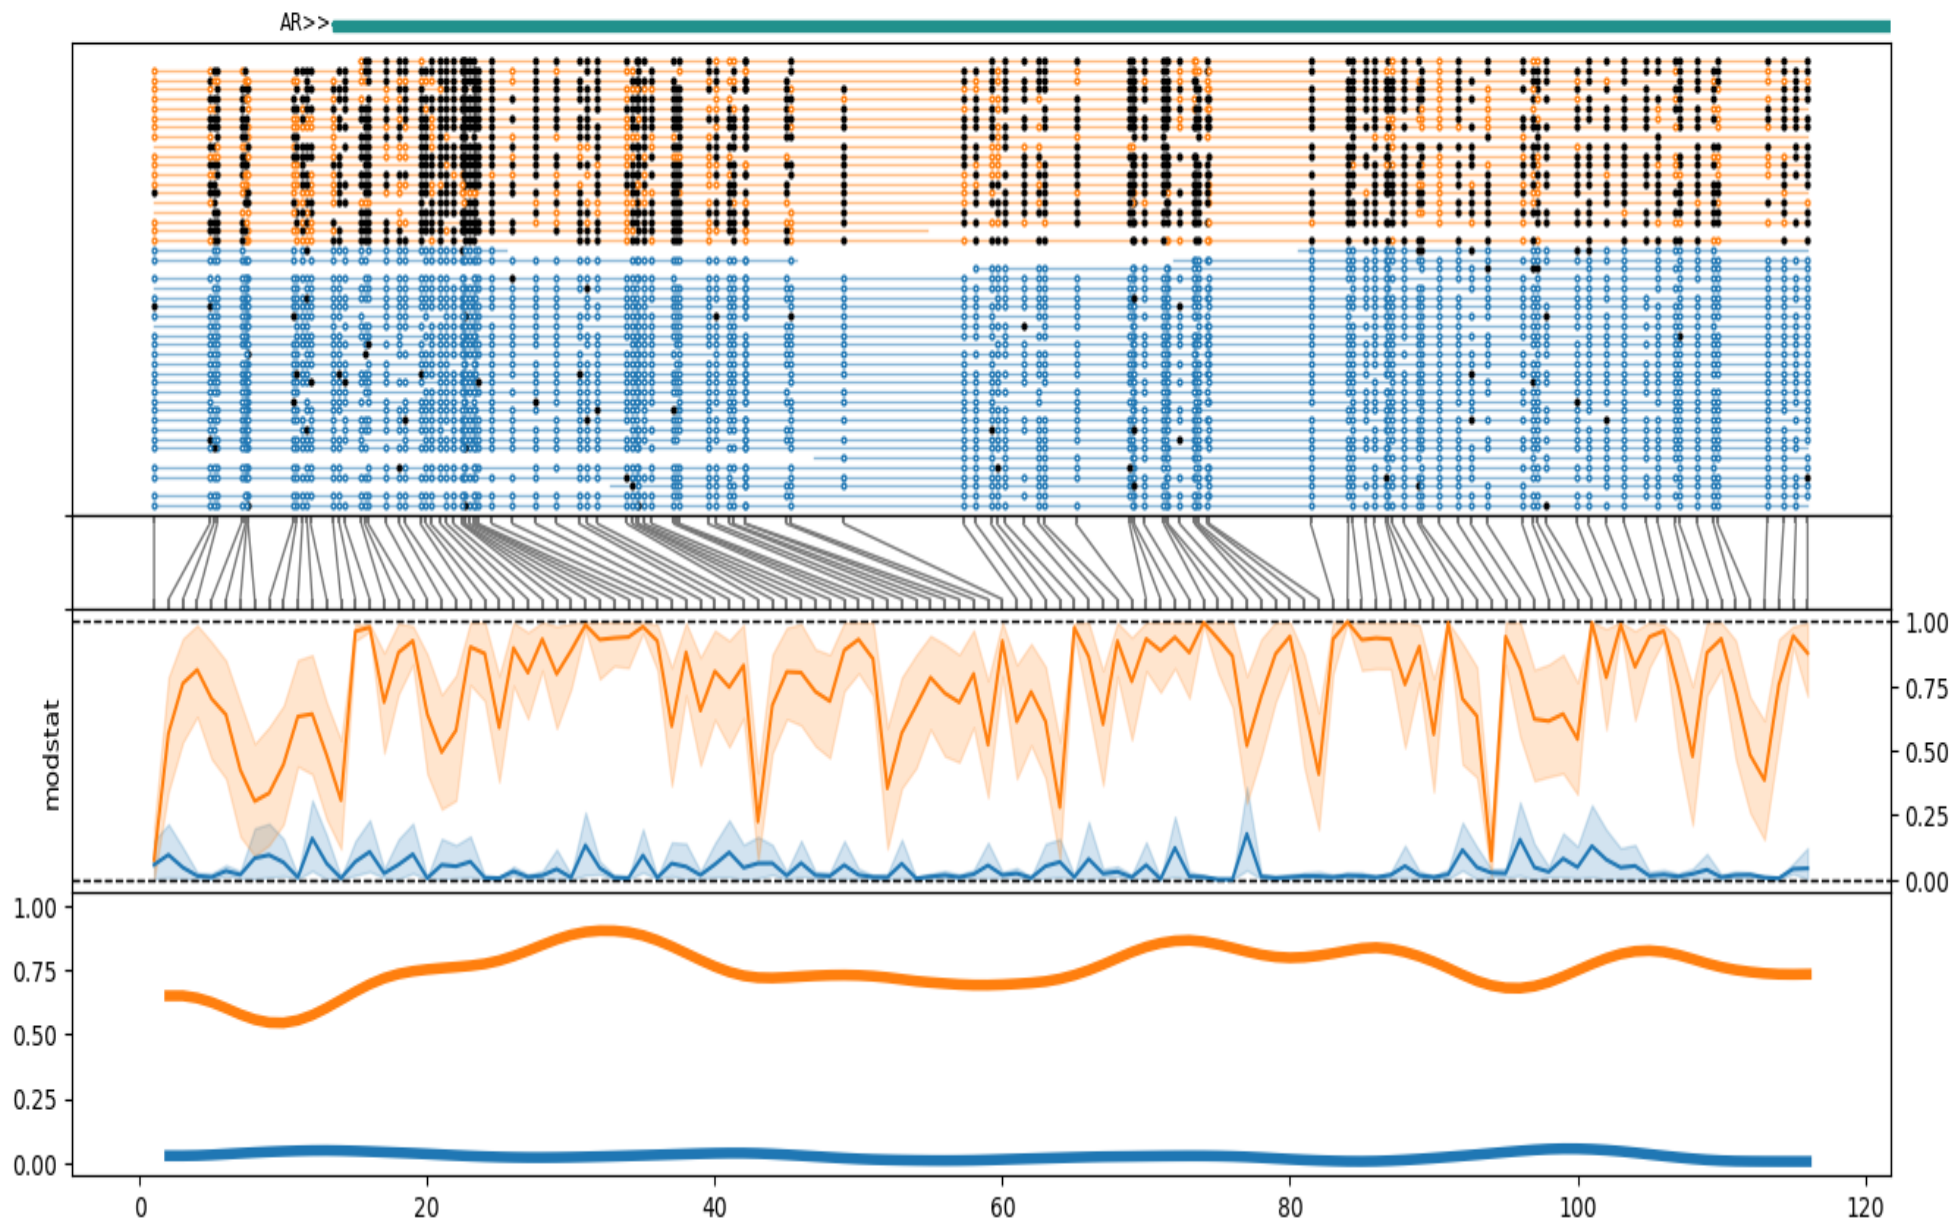

# EPI\_13\_urine\_hg38\_phased\_chrX\_134372110\_134374891

chrX134372223 134372475 134372727 134372979 134373231 134373483 134373735 134373987 134374239 134374491 134374743 134374995

PHF6>>

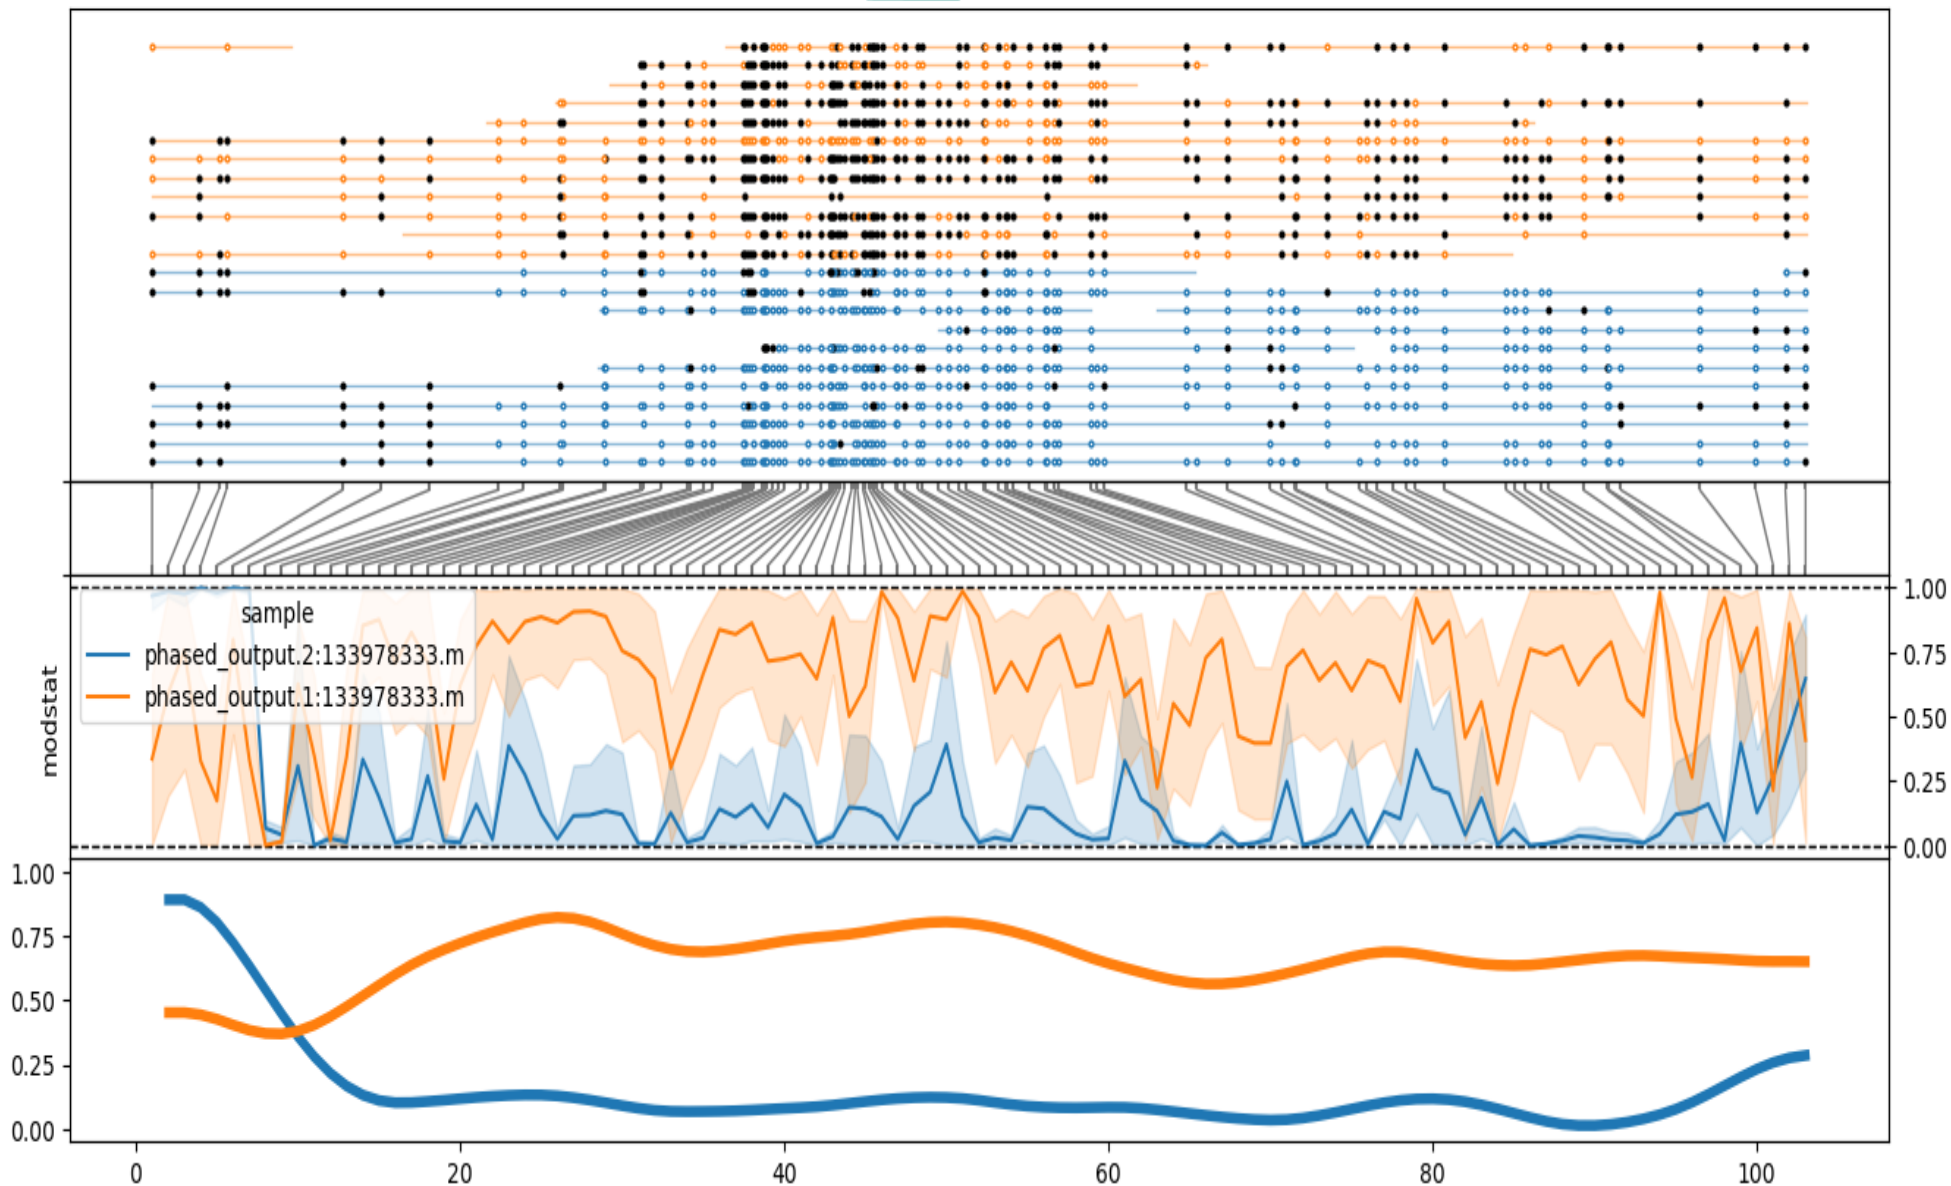

# EPI\_13\_urine\_hg38\_phased\_chrX\_46836539\_46837273

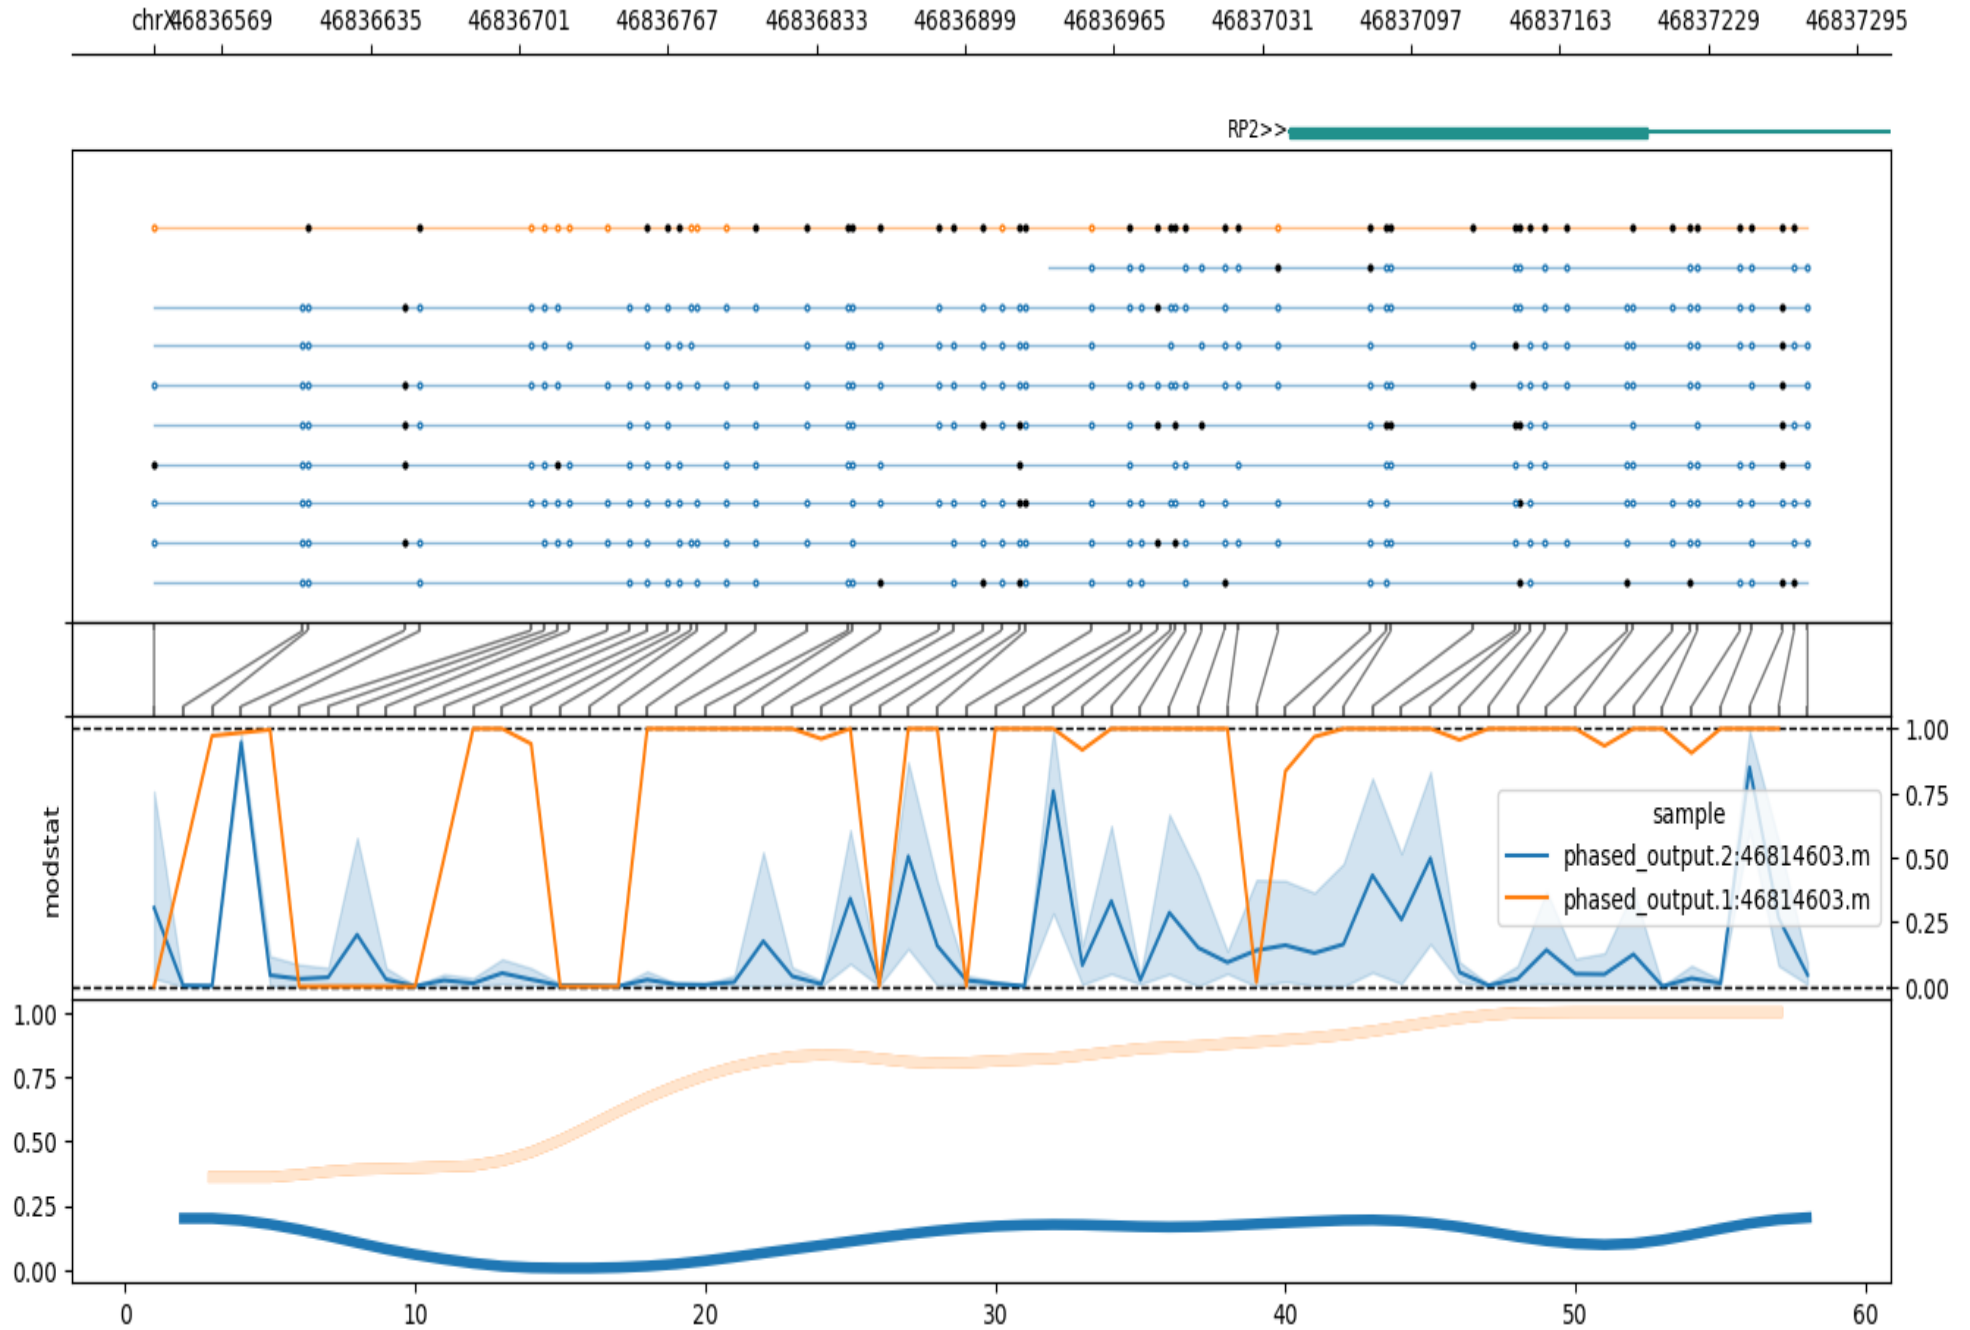

# EPI\_13\_urine\_hg38\_phased\_chrX\_67543761\_67546170

chr67543860 67544079 67544298 67544517 67544736 67544955 67545174 67545393 67545612 67545831 67546050 67546269

AR>>

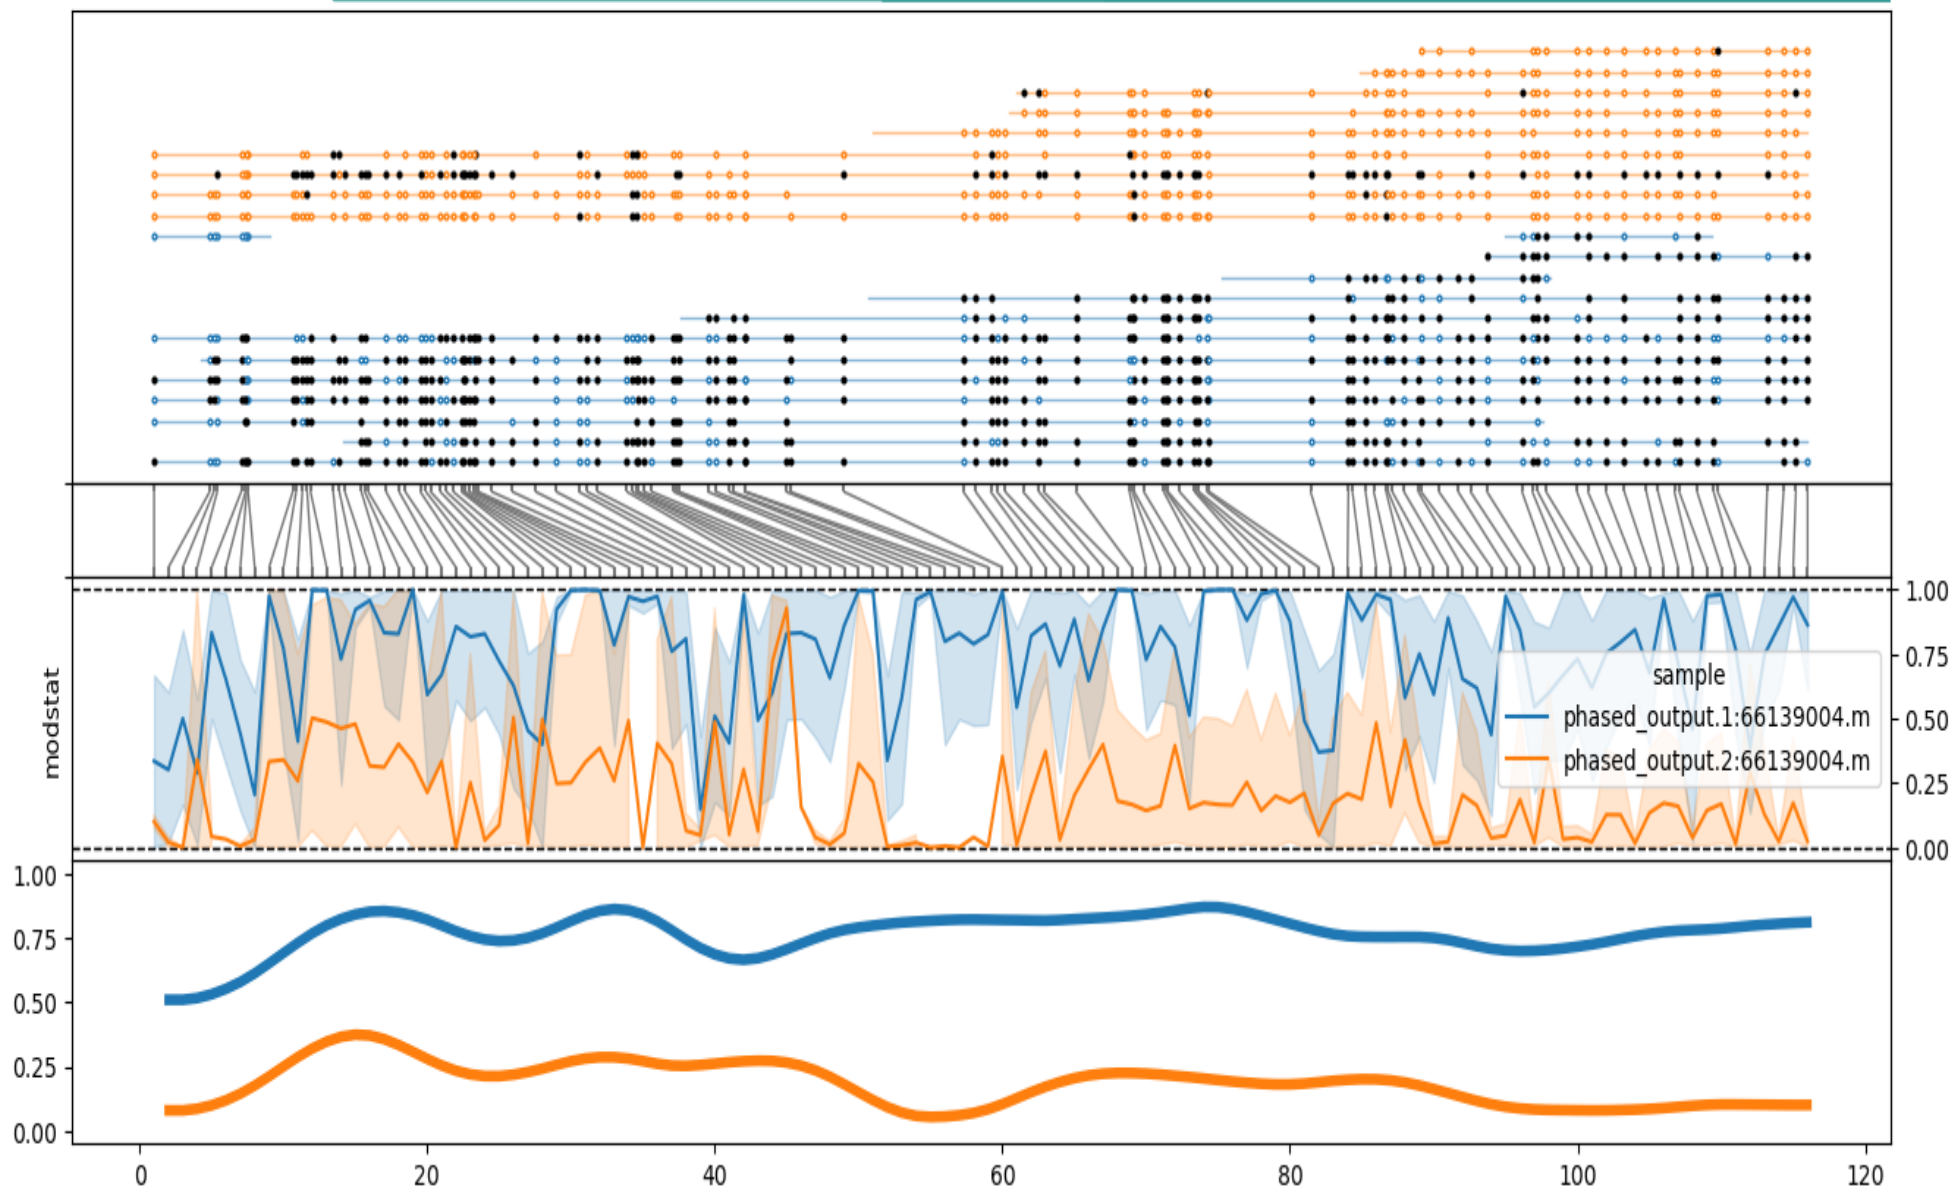



# EPI\_14\_hg38\_phased\_chr11\_1997509\_2003349

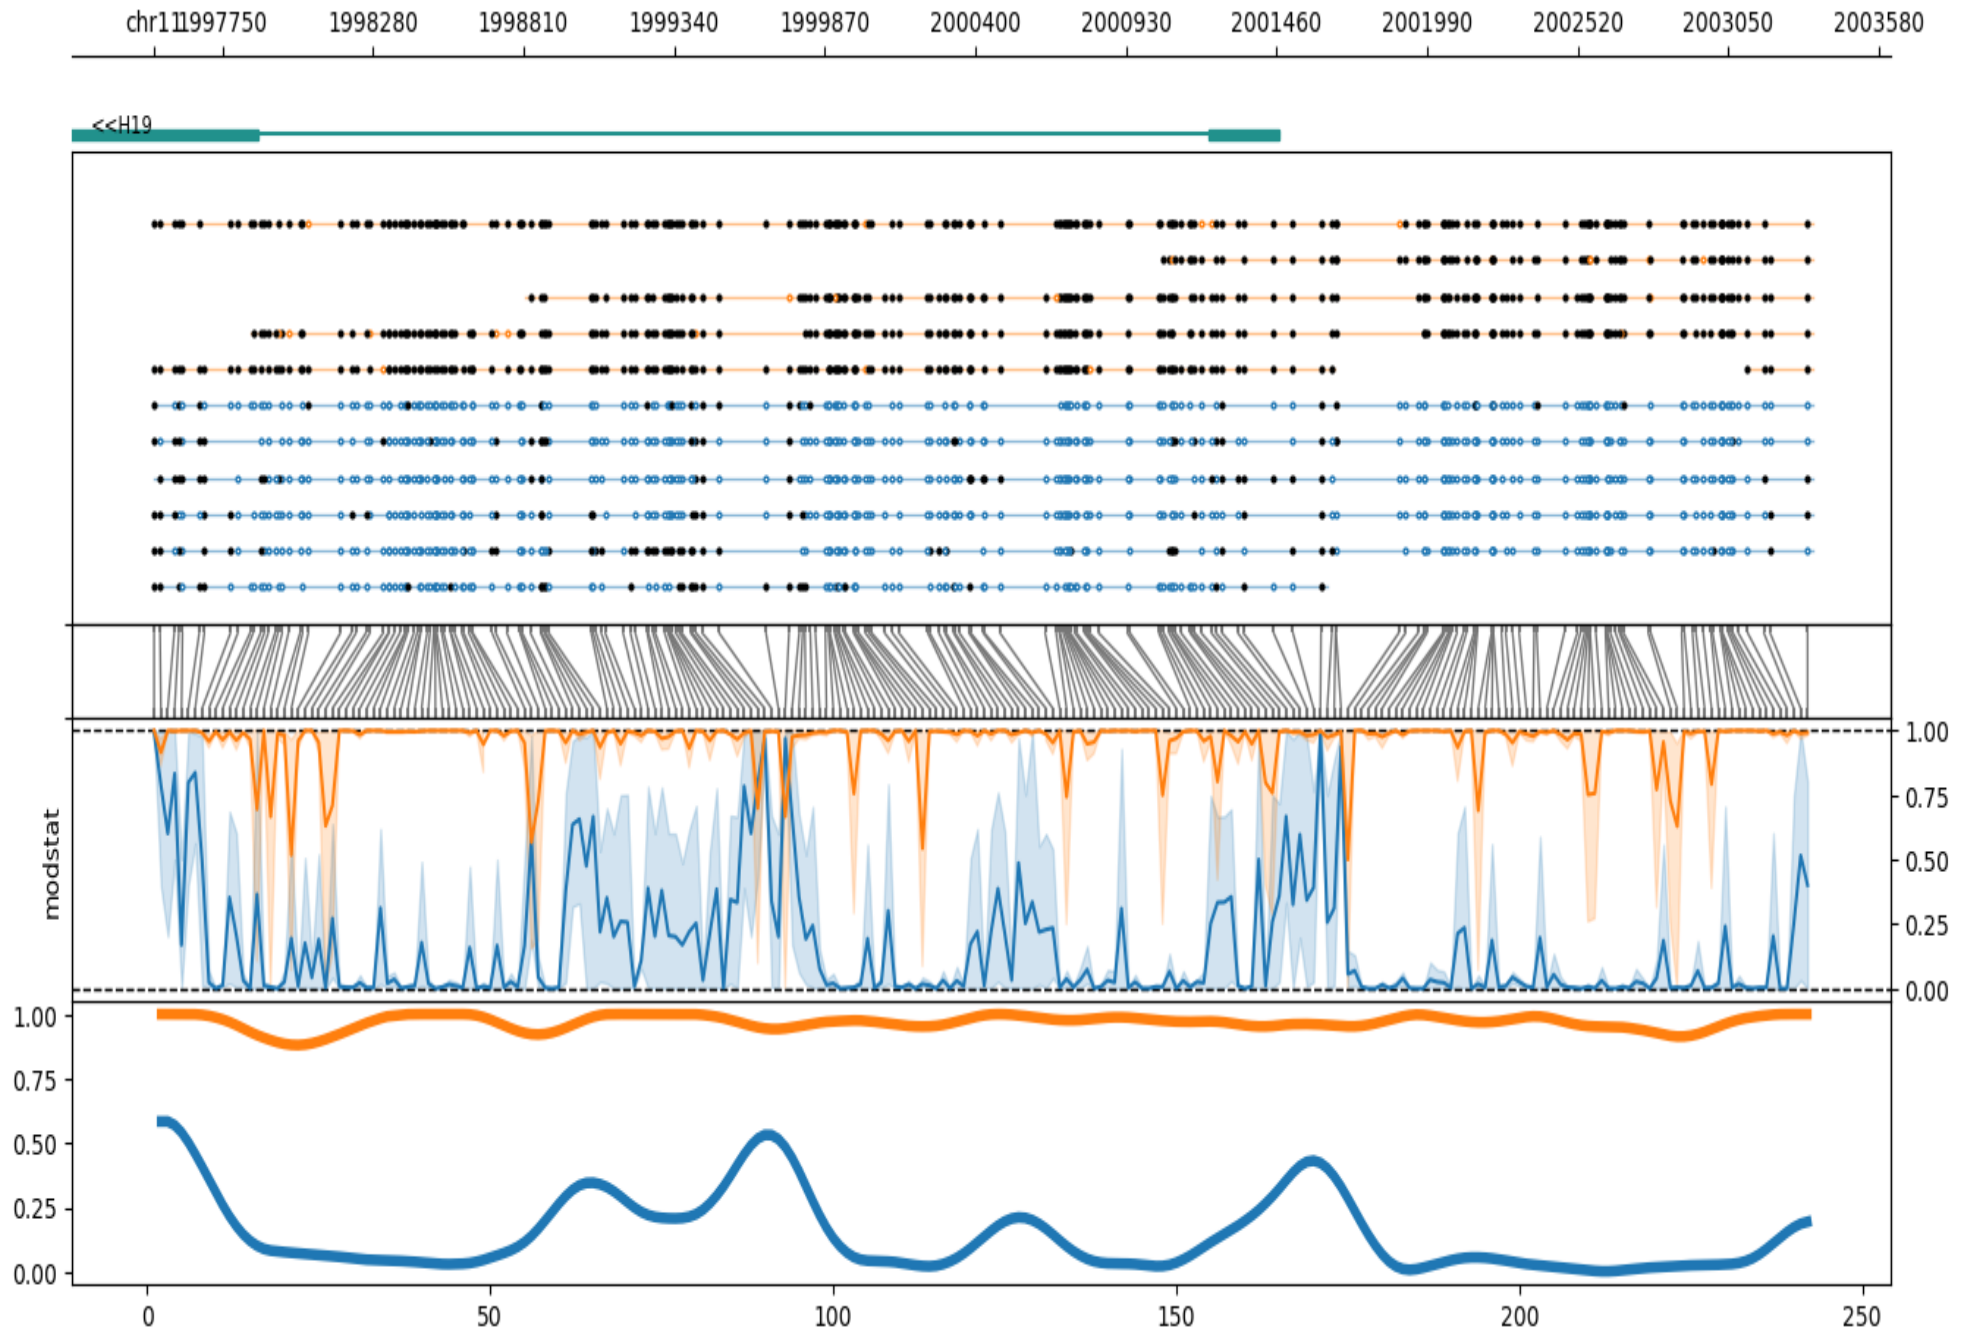

# EPI\_14\_hg38\_phased\_chr11\_2698155\_2701028

chr11 2698274 2698535 2698796 2699057 2699318 2699579 2699840 2700101 2700362 2700623 2700884 2701145

KCNQ1>>

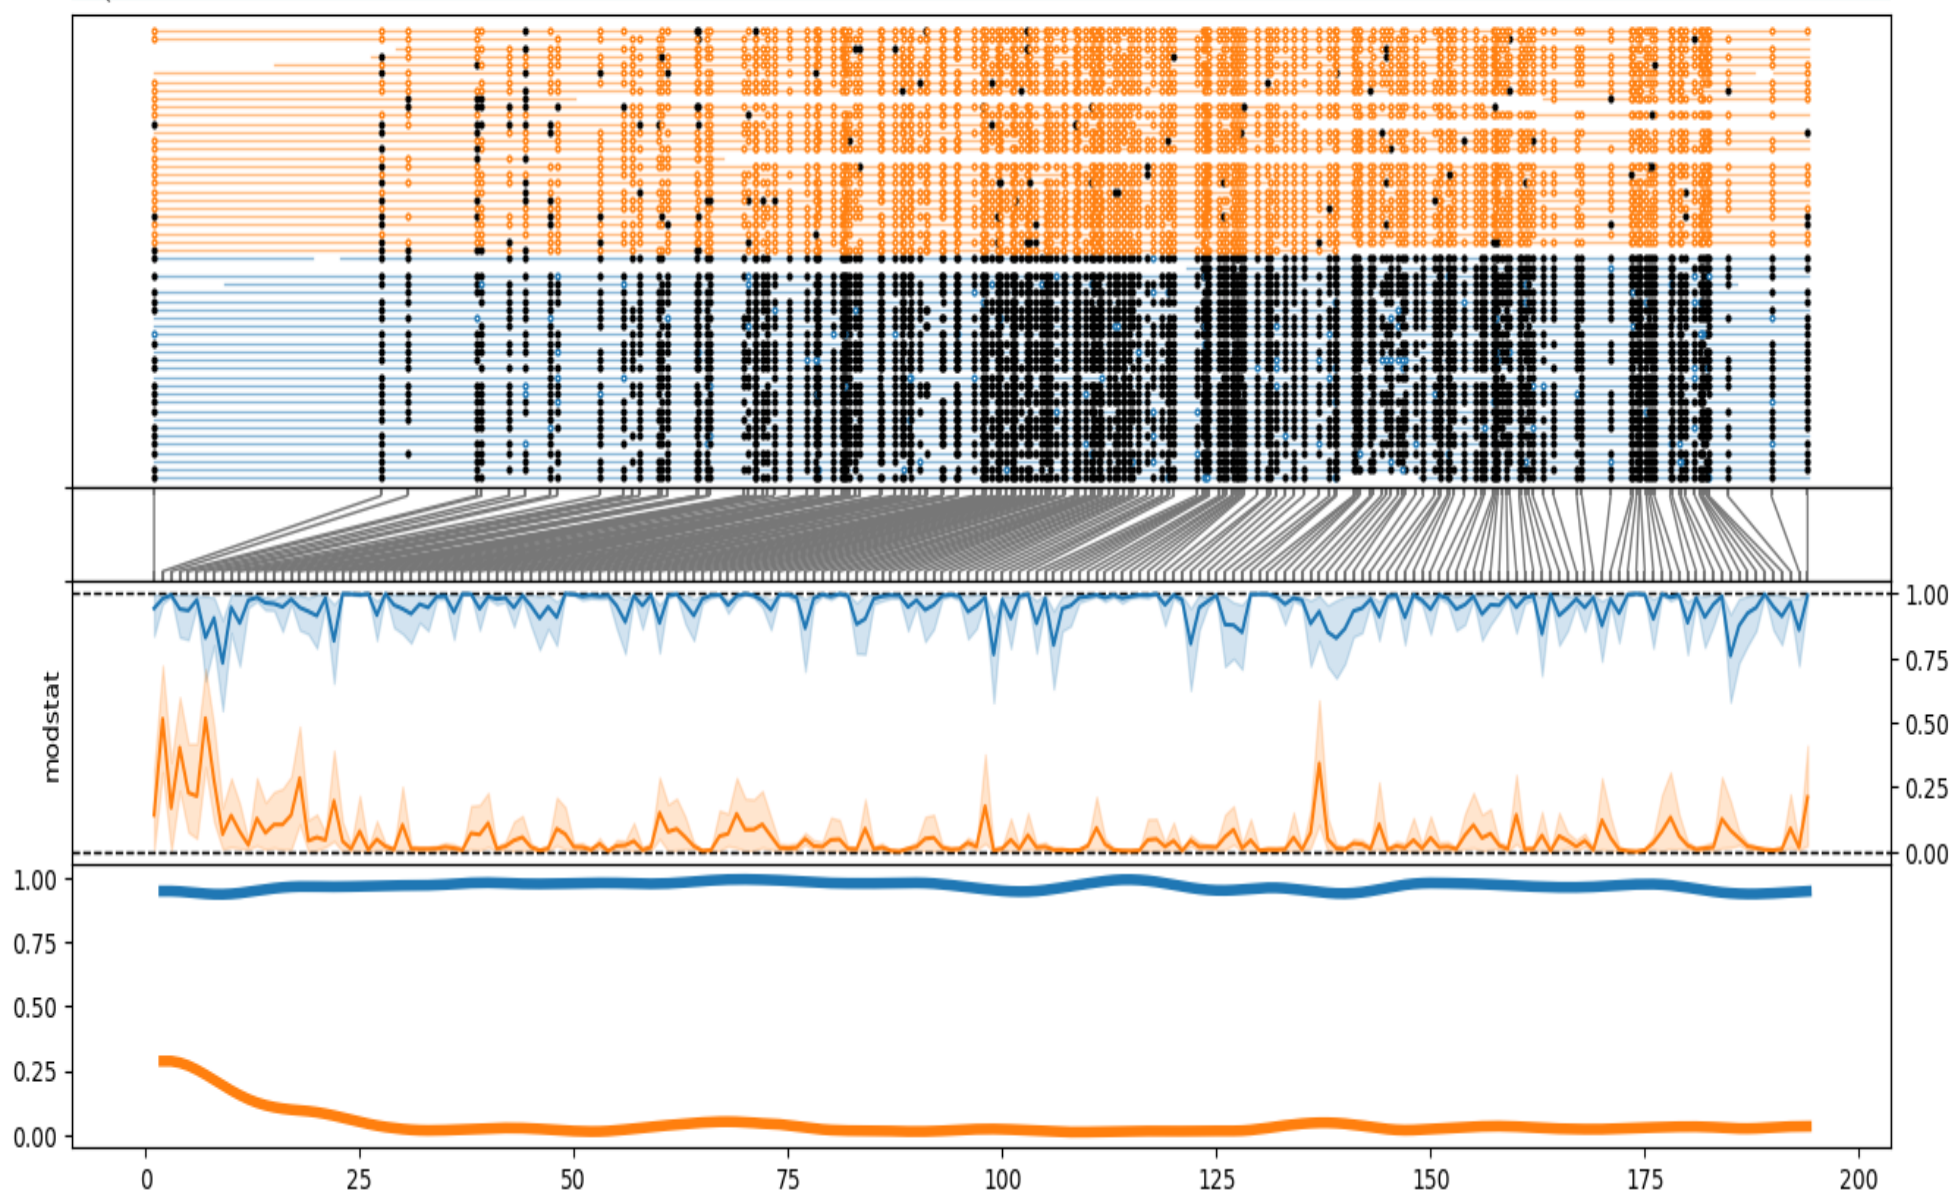

# EPI\_14\_hg38\_phased\_chr14\_100824185\_100827640

chr14 100824328 100824642 100824956 100825270 100825584 100825898 100826212 100826526 100826840 100827154 100827468 100827782

MEG3>>

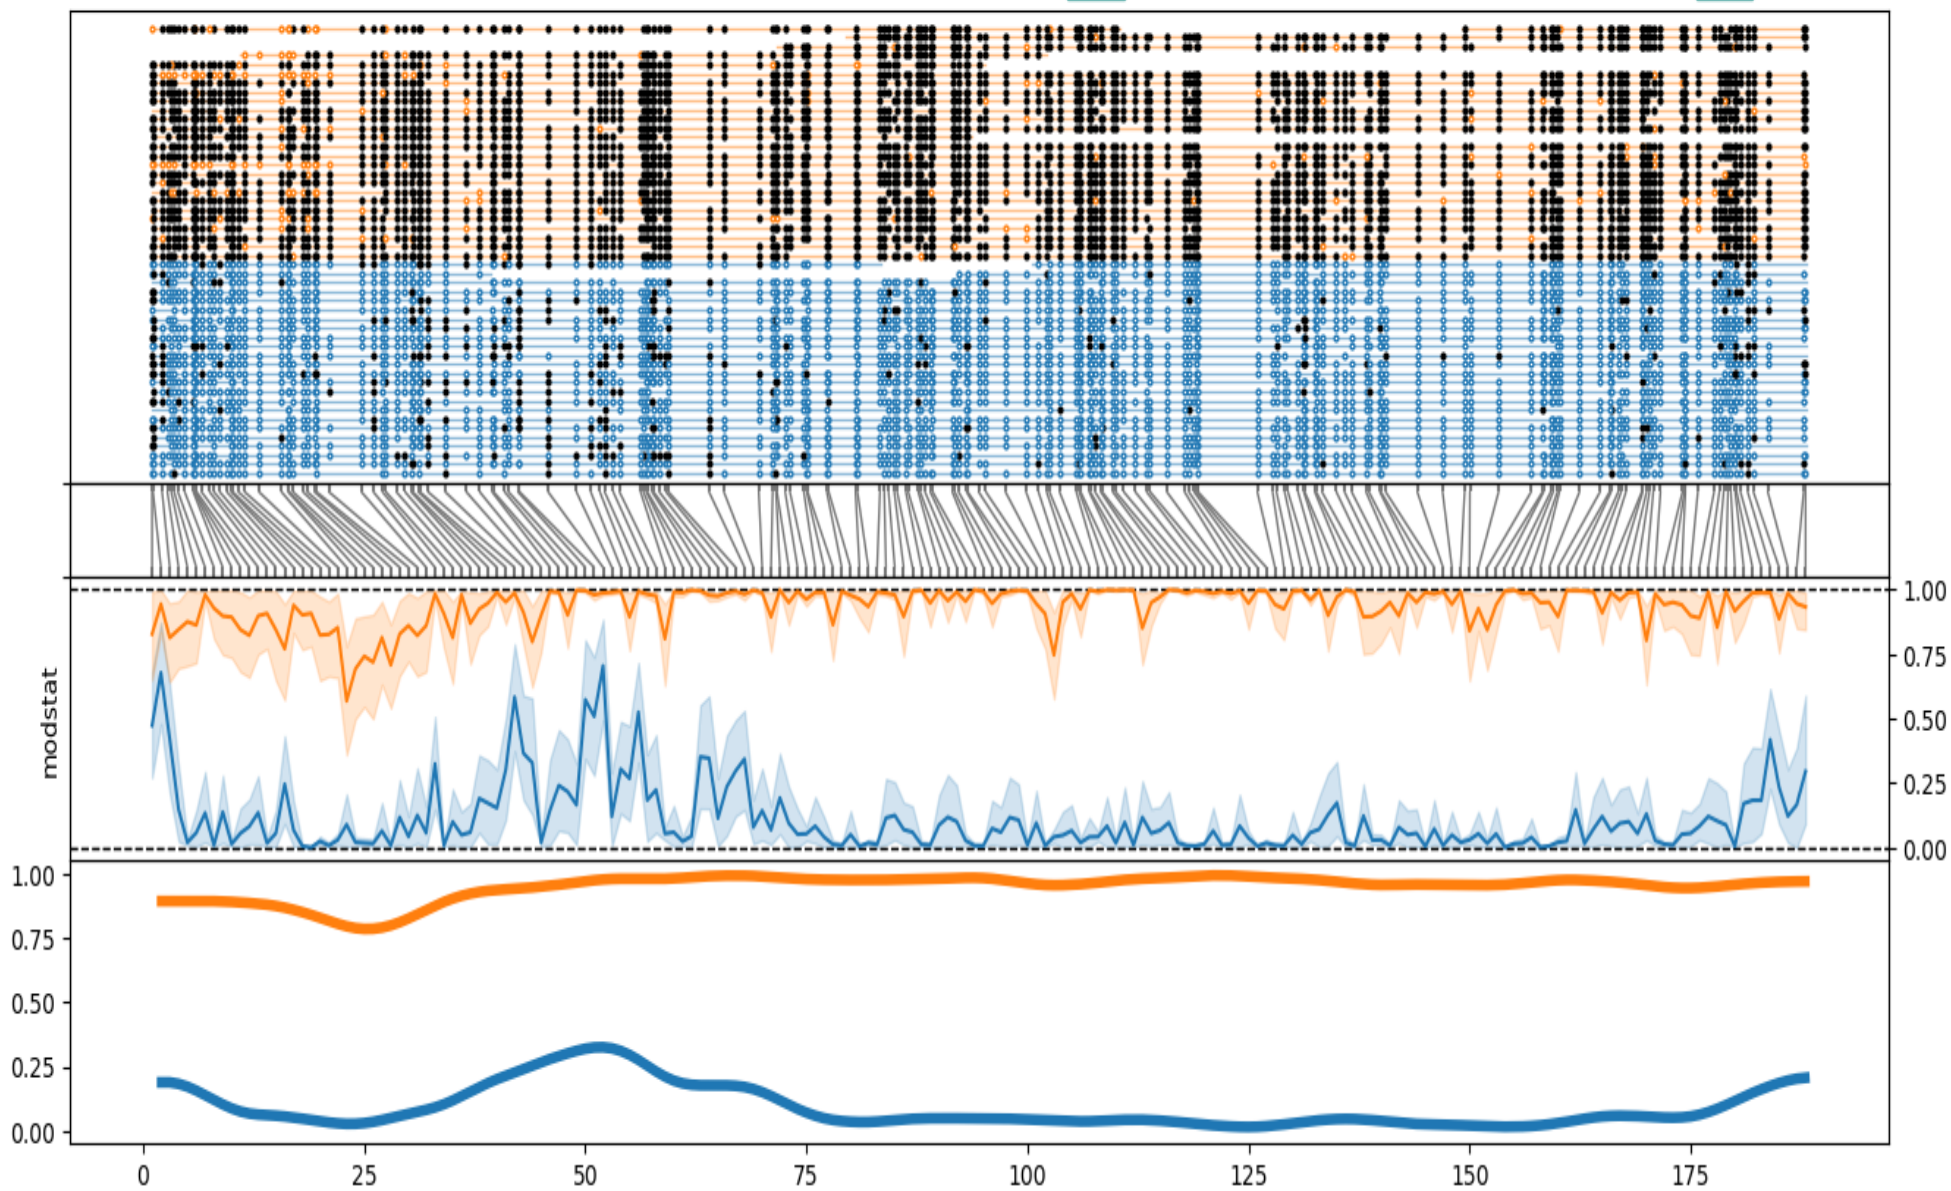



# EPI\_14\_hg38\_phased\_chr14\_100904325\_100905081

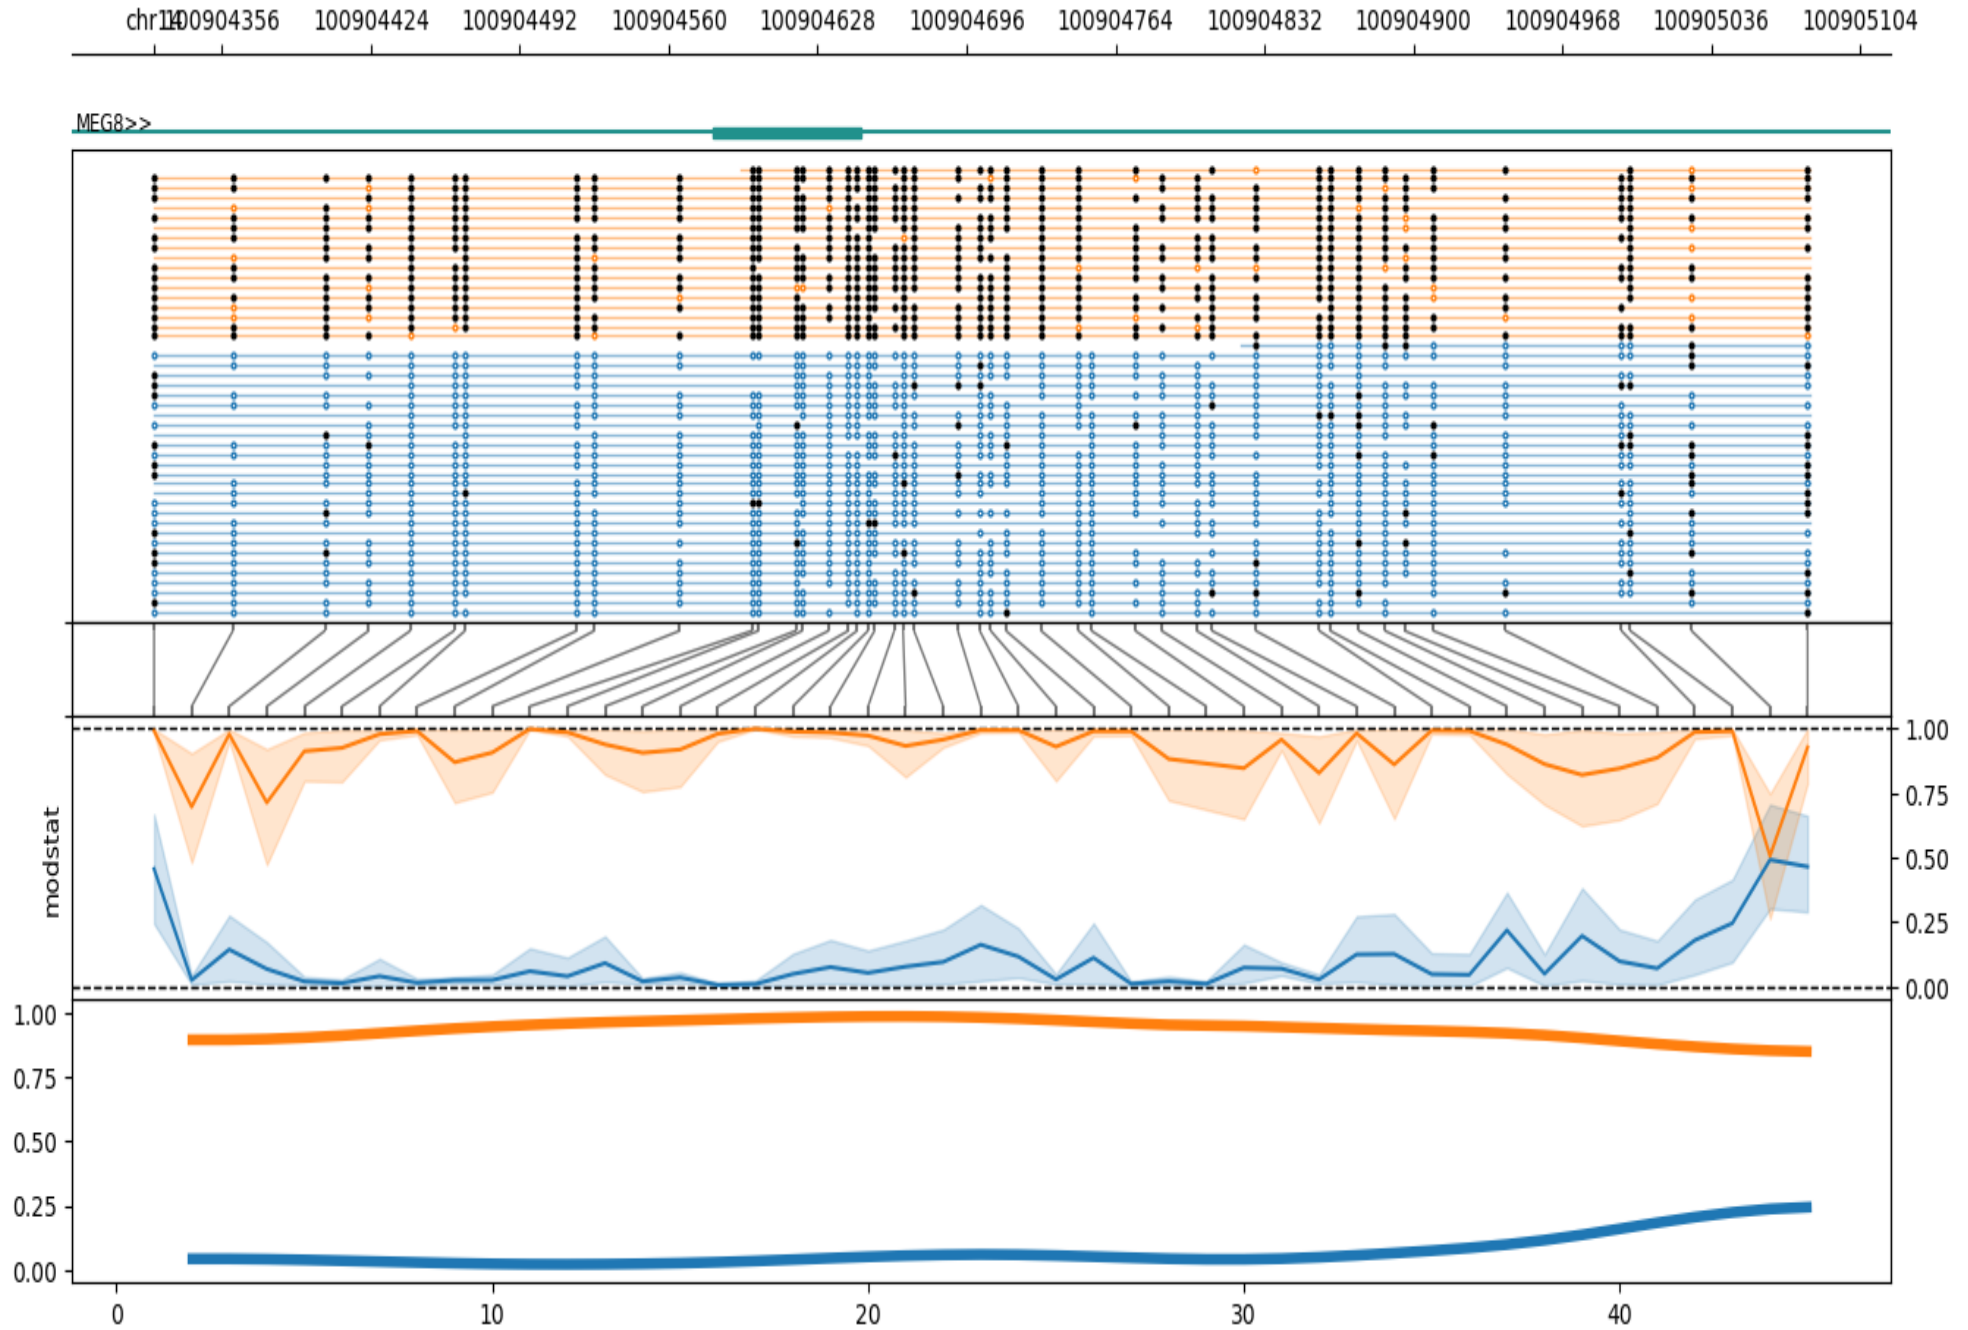



# EPI\_14\_hg38\_phased\_chromosome15\_23647178\_23648424

chr15:23647229 23647342 23647455 23647568 23647681 23647794 23647907 23648020 23648133 23648246 23648359 23648472

<<MAGEL2

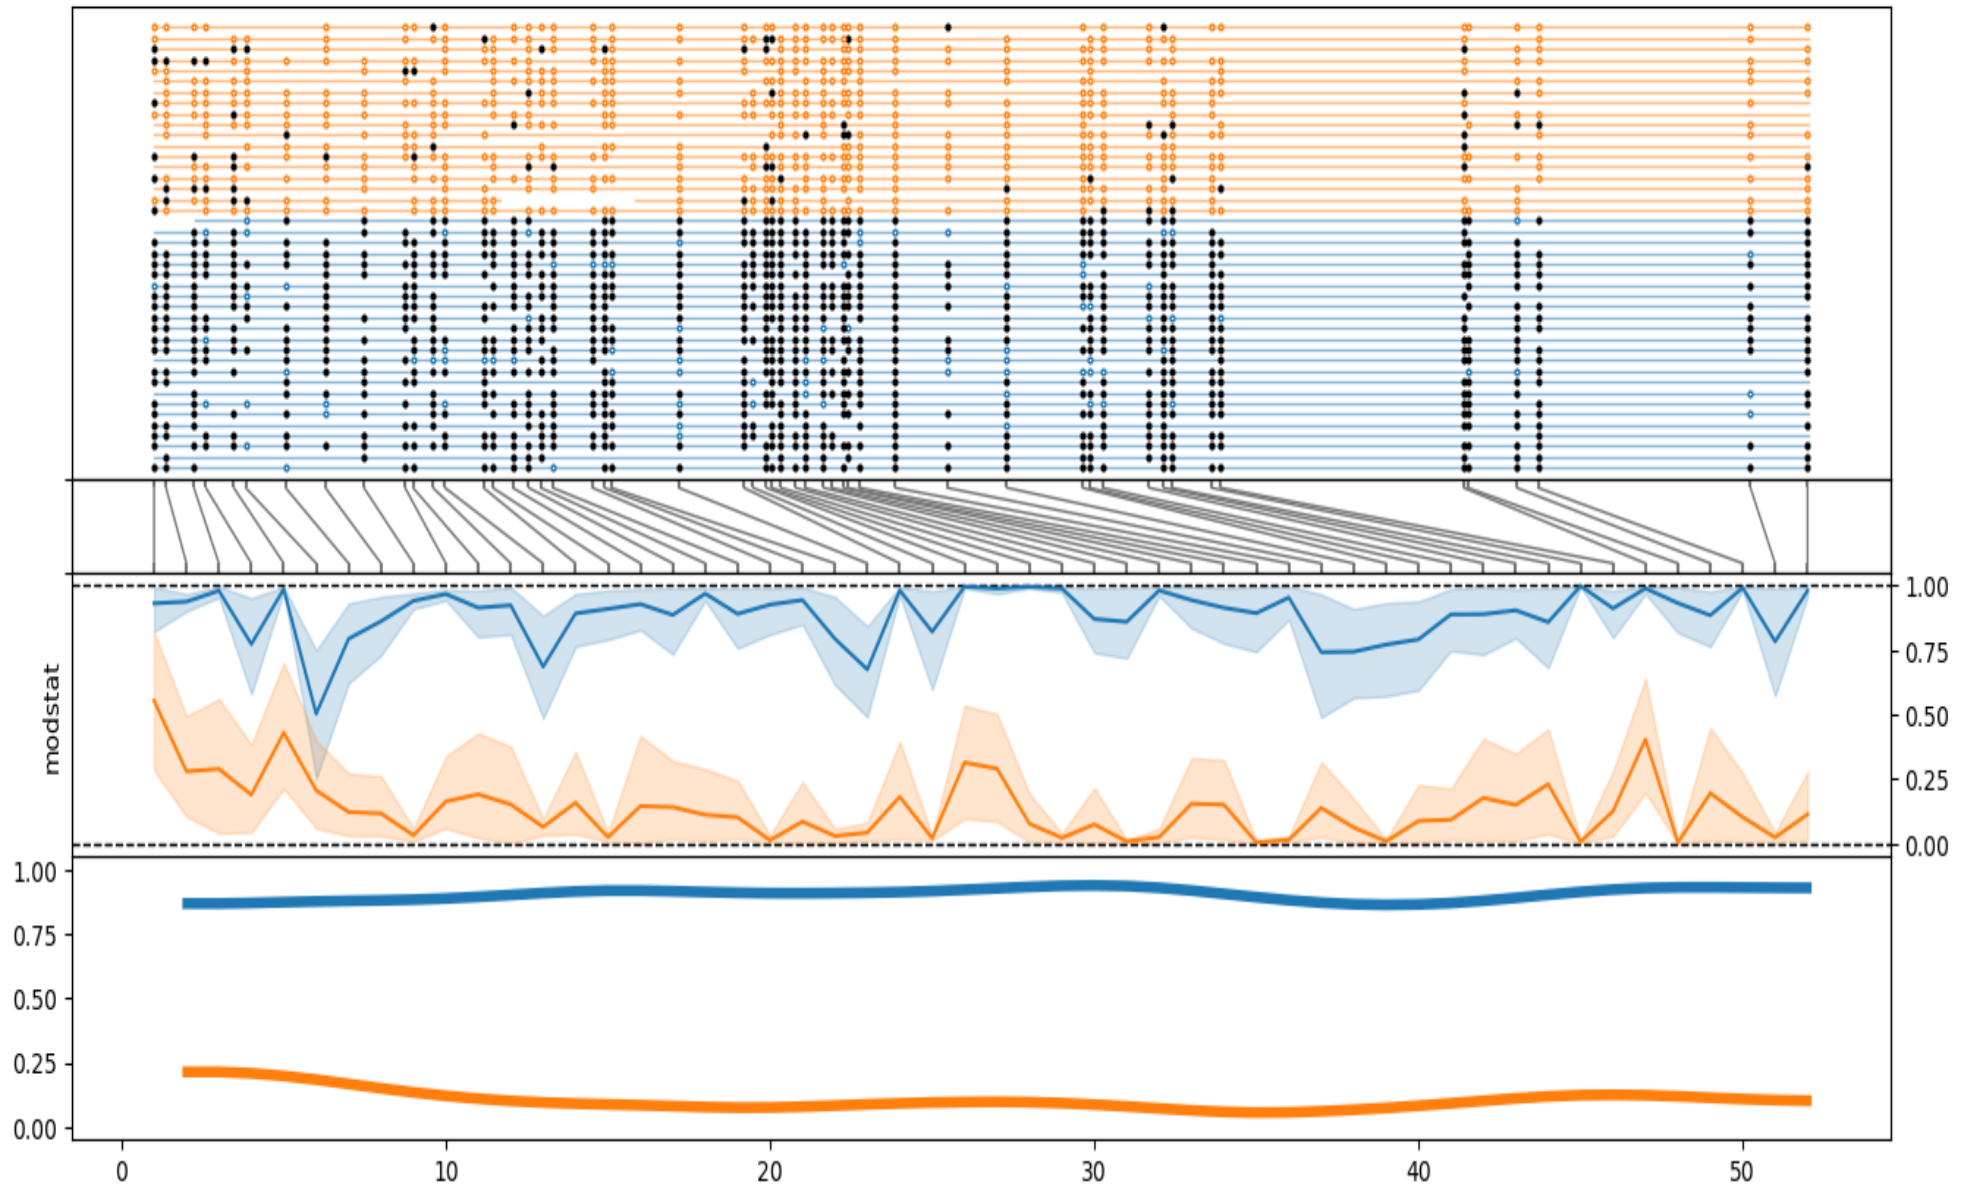

# EPI\_14\_hg38\_phased\_chromosome15\_24954564\_24956828

chr15:24954657 24954862 24955067 24955272 24955477 24955682 24955887 24956092 24956297 24956502 24956707 24956912

SNRPN>>

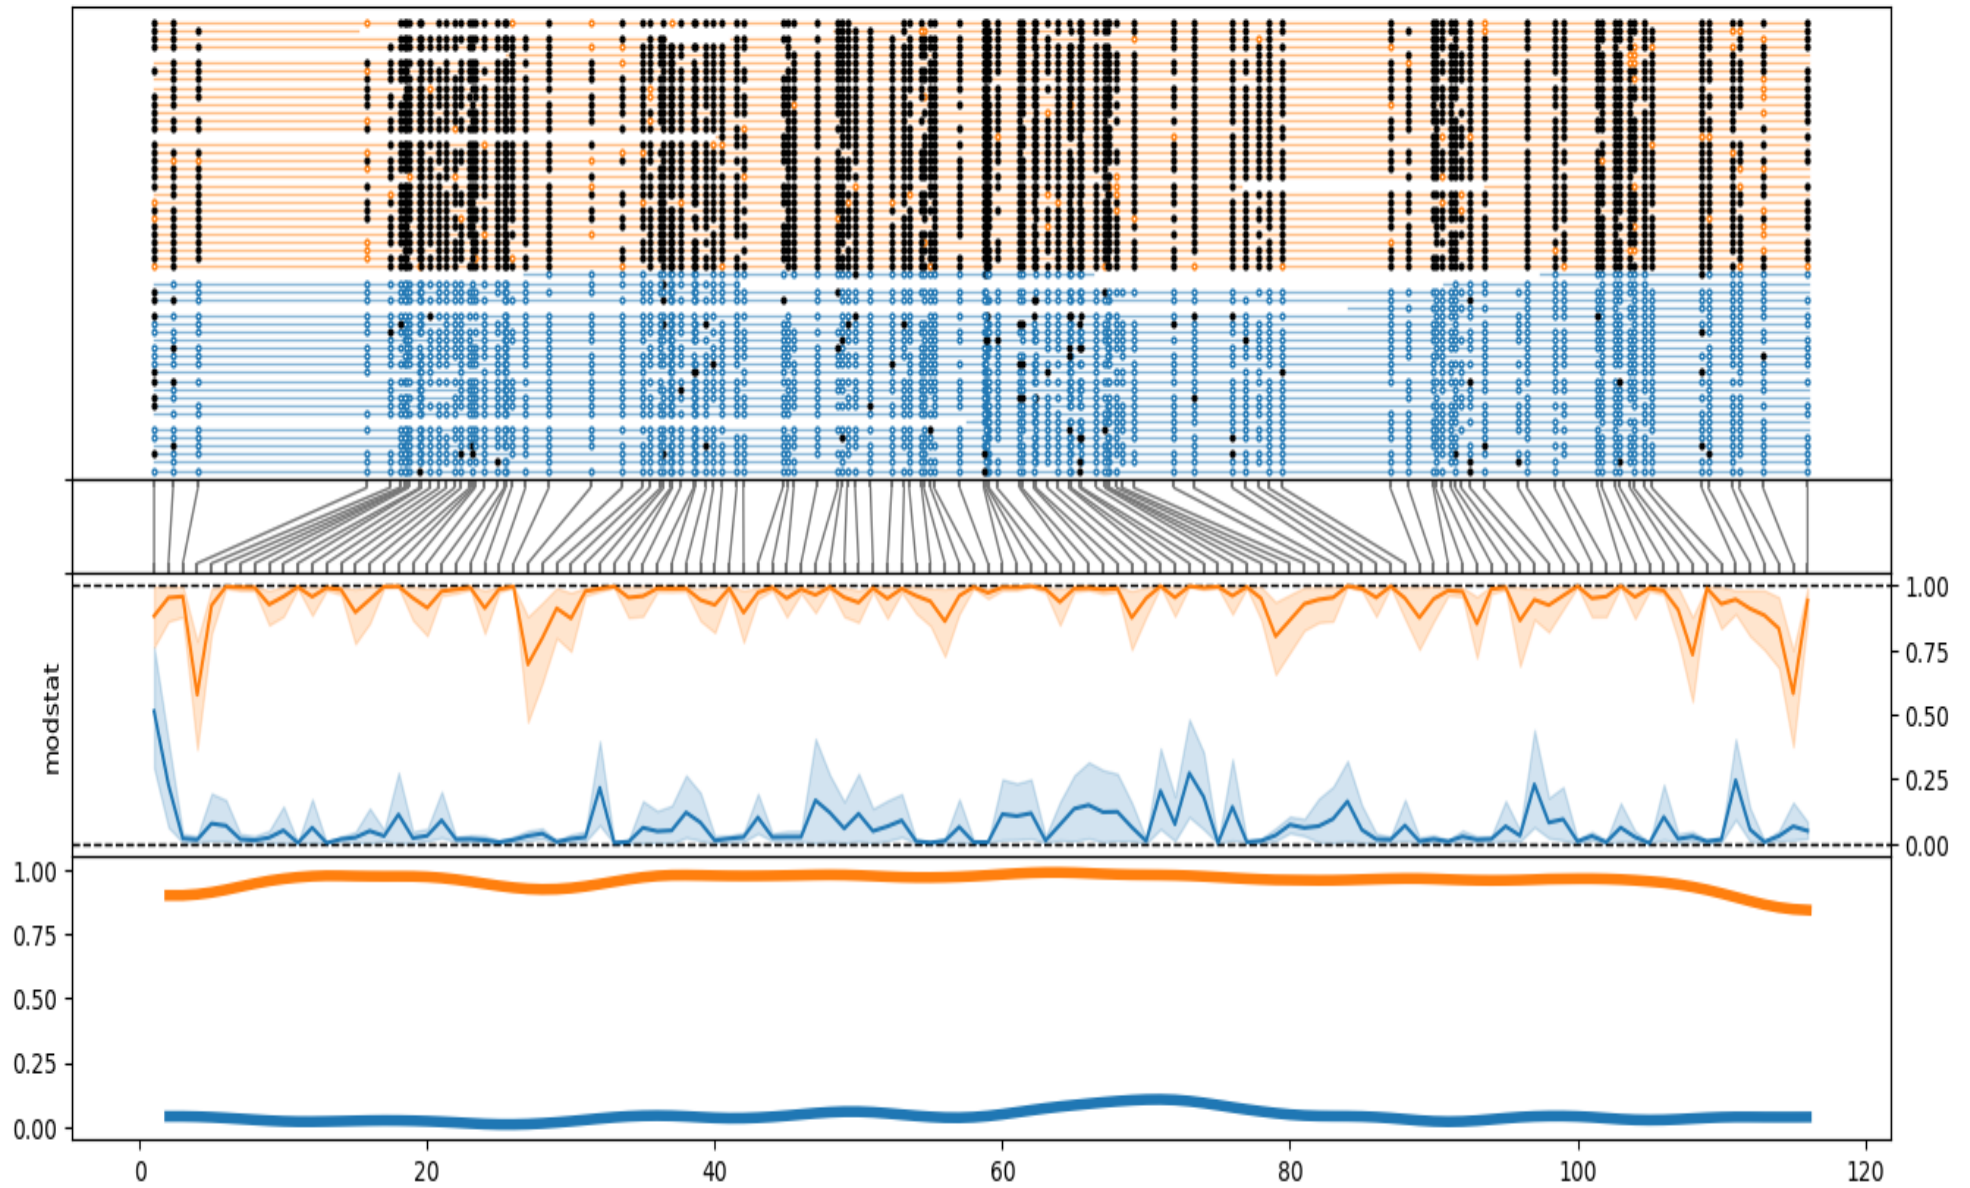

# EPI\_14\_hg38\_phased\_chrX\_134372110\_134374891

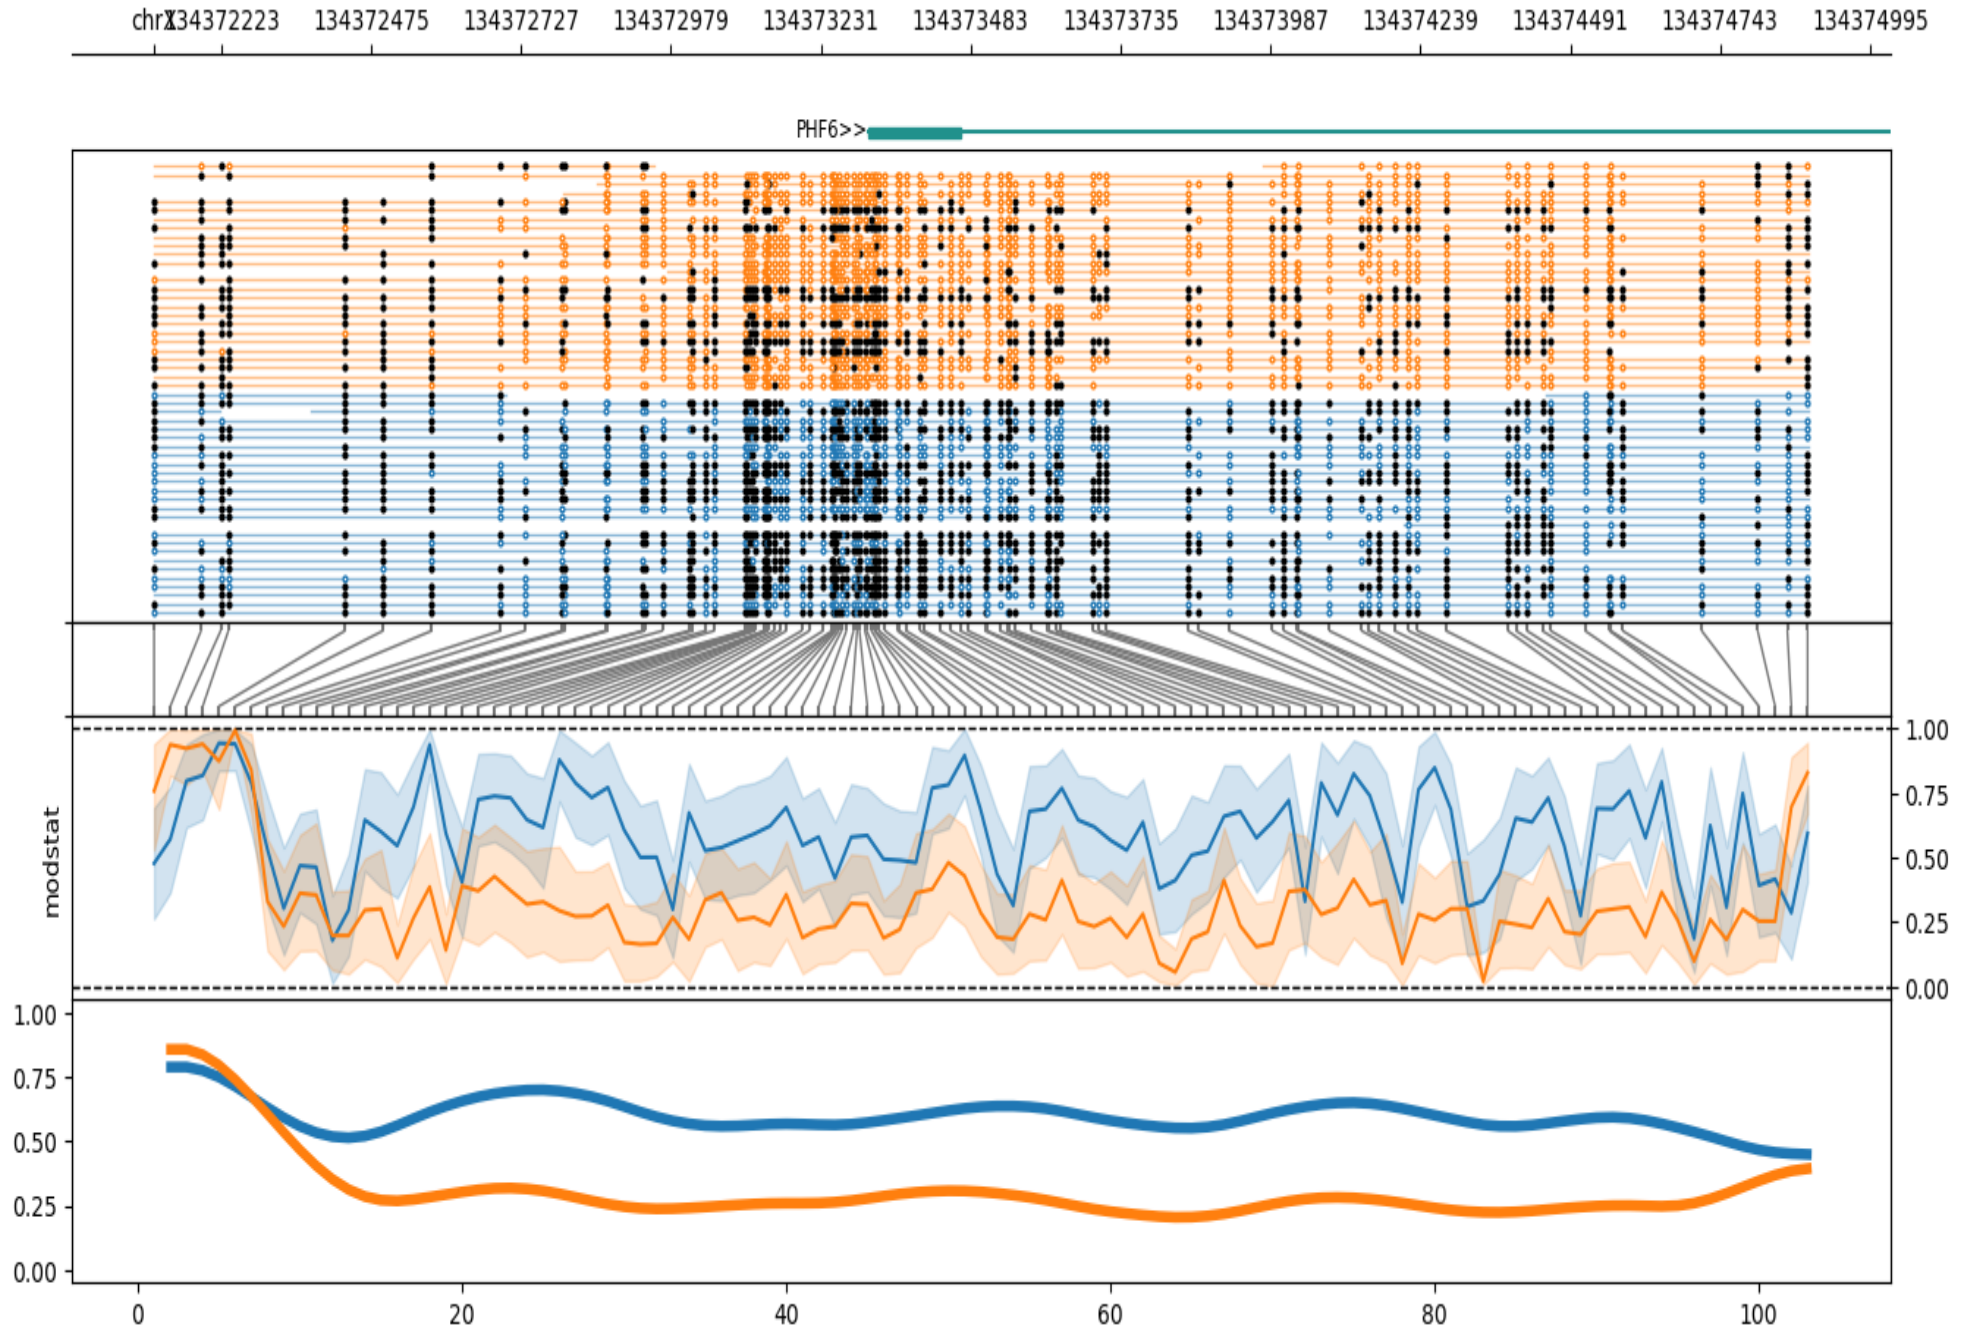



# EPI\_14\_hg38\_phased\_chrX\_46836539\_46837273

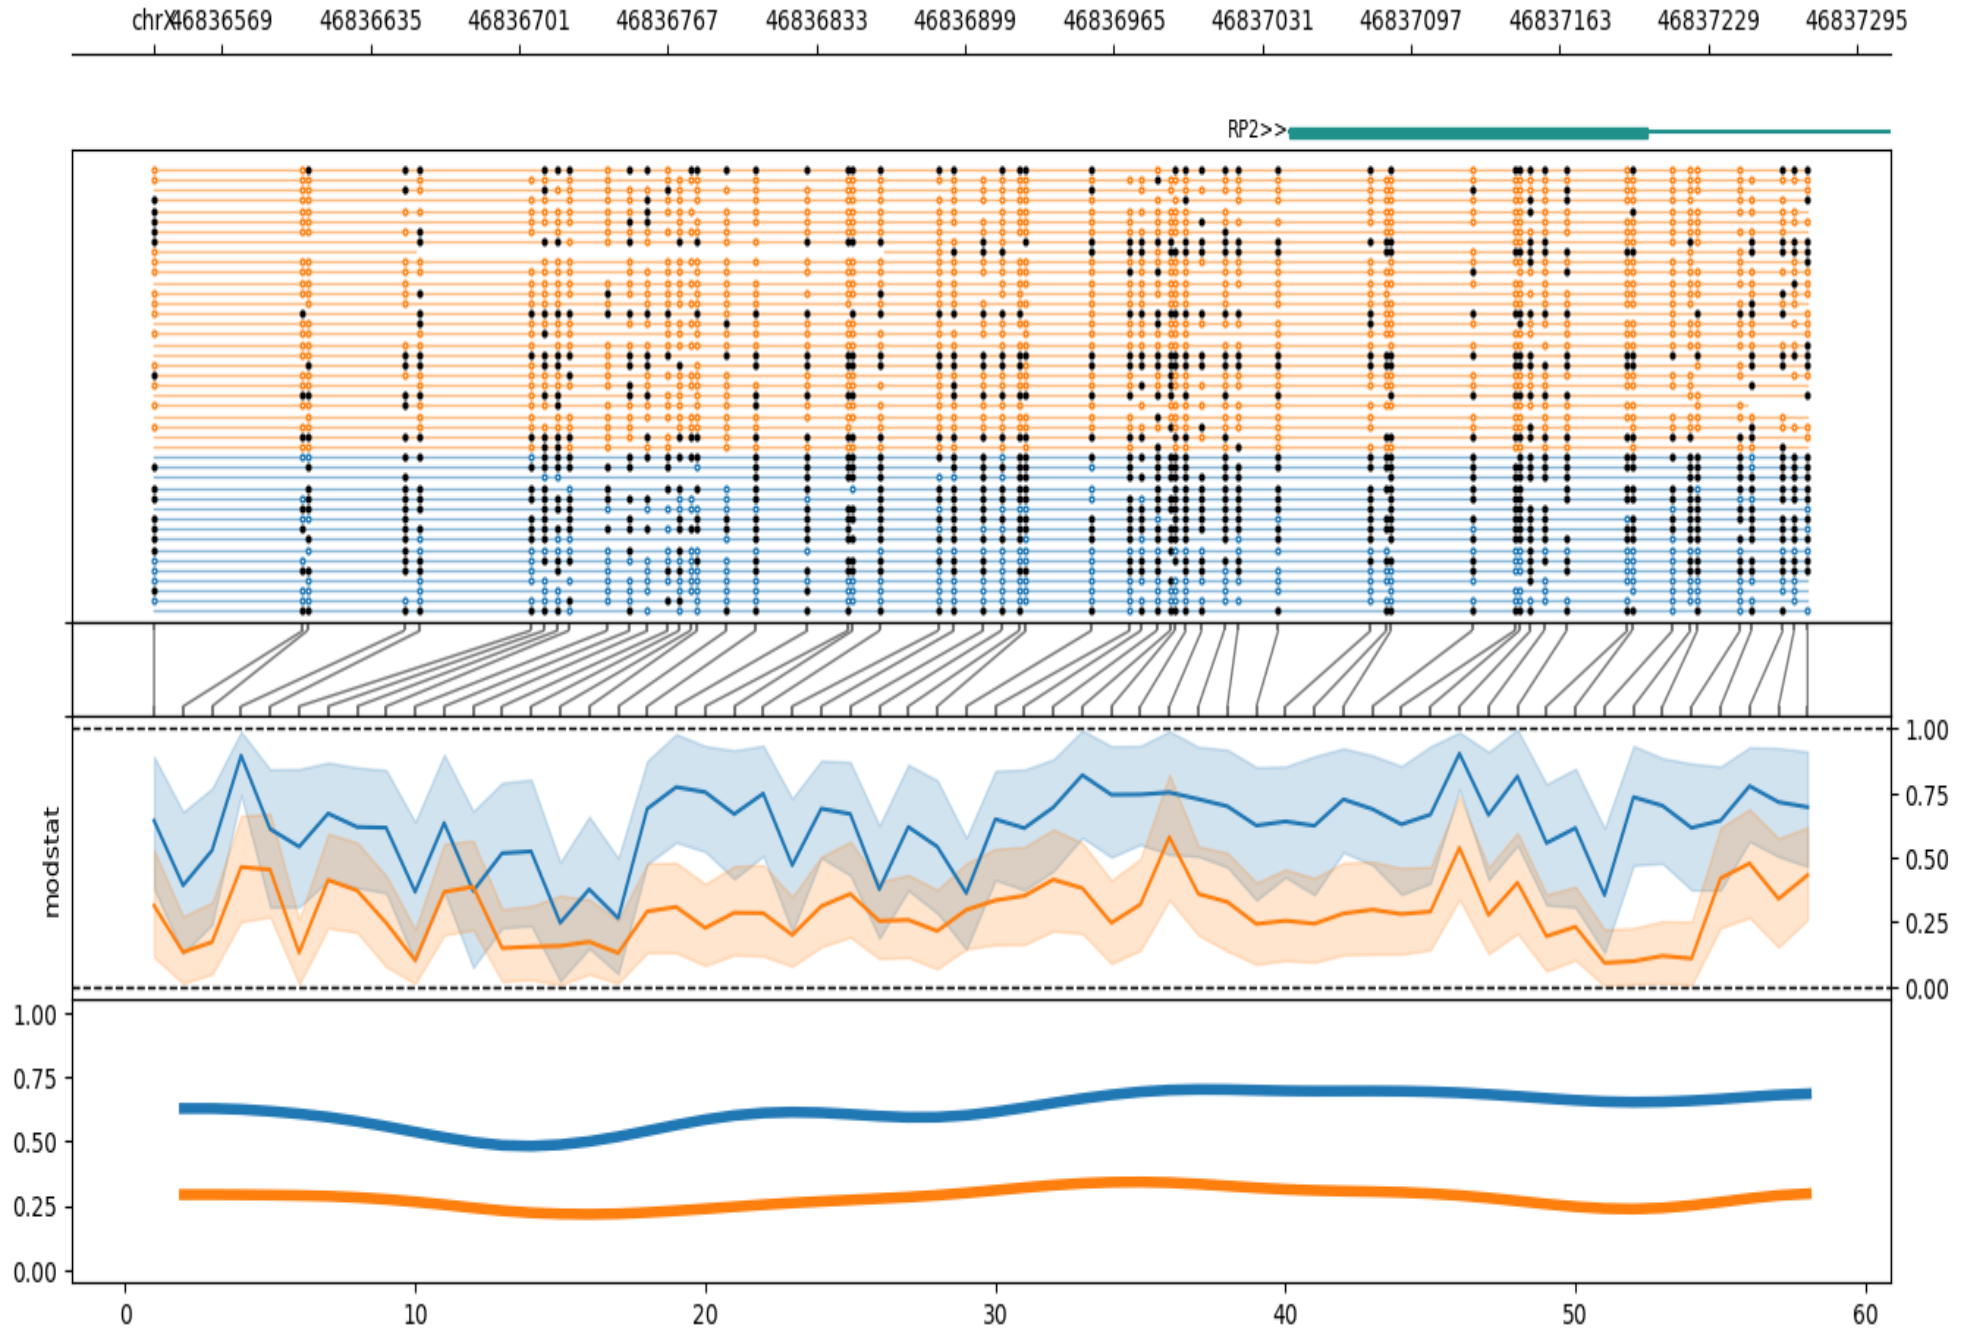



# EPI\_14\_hg38\_phased\_chrX\_67543761\_67546170

chr67543860 67544079 67544298 67544517 67544736 67544955 67545174 67545393 67545612 67545831 67546050 67546269

AR>>

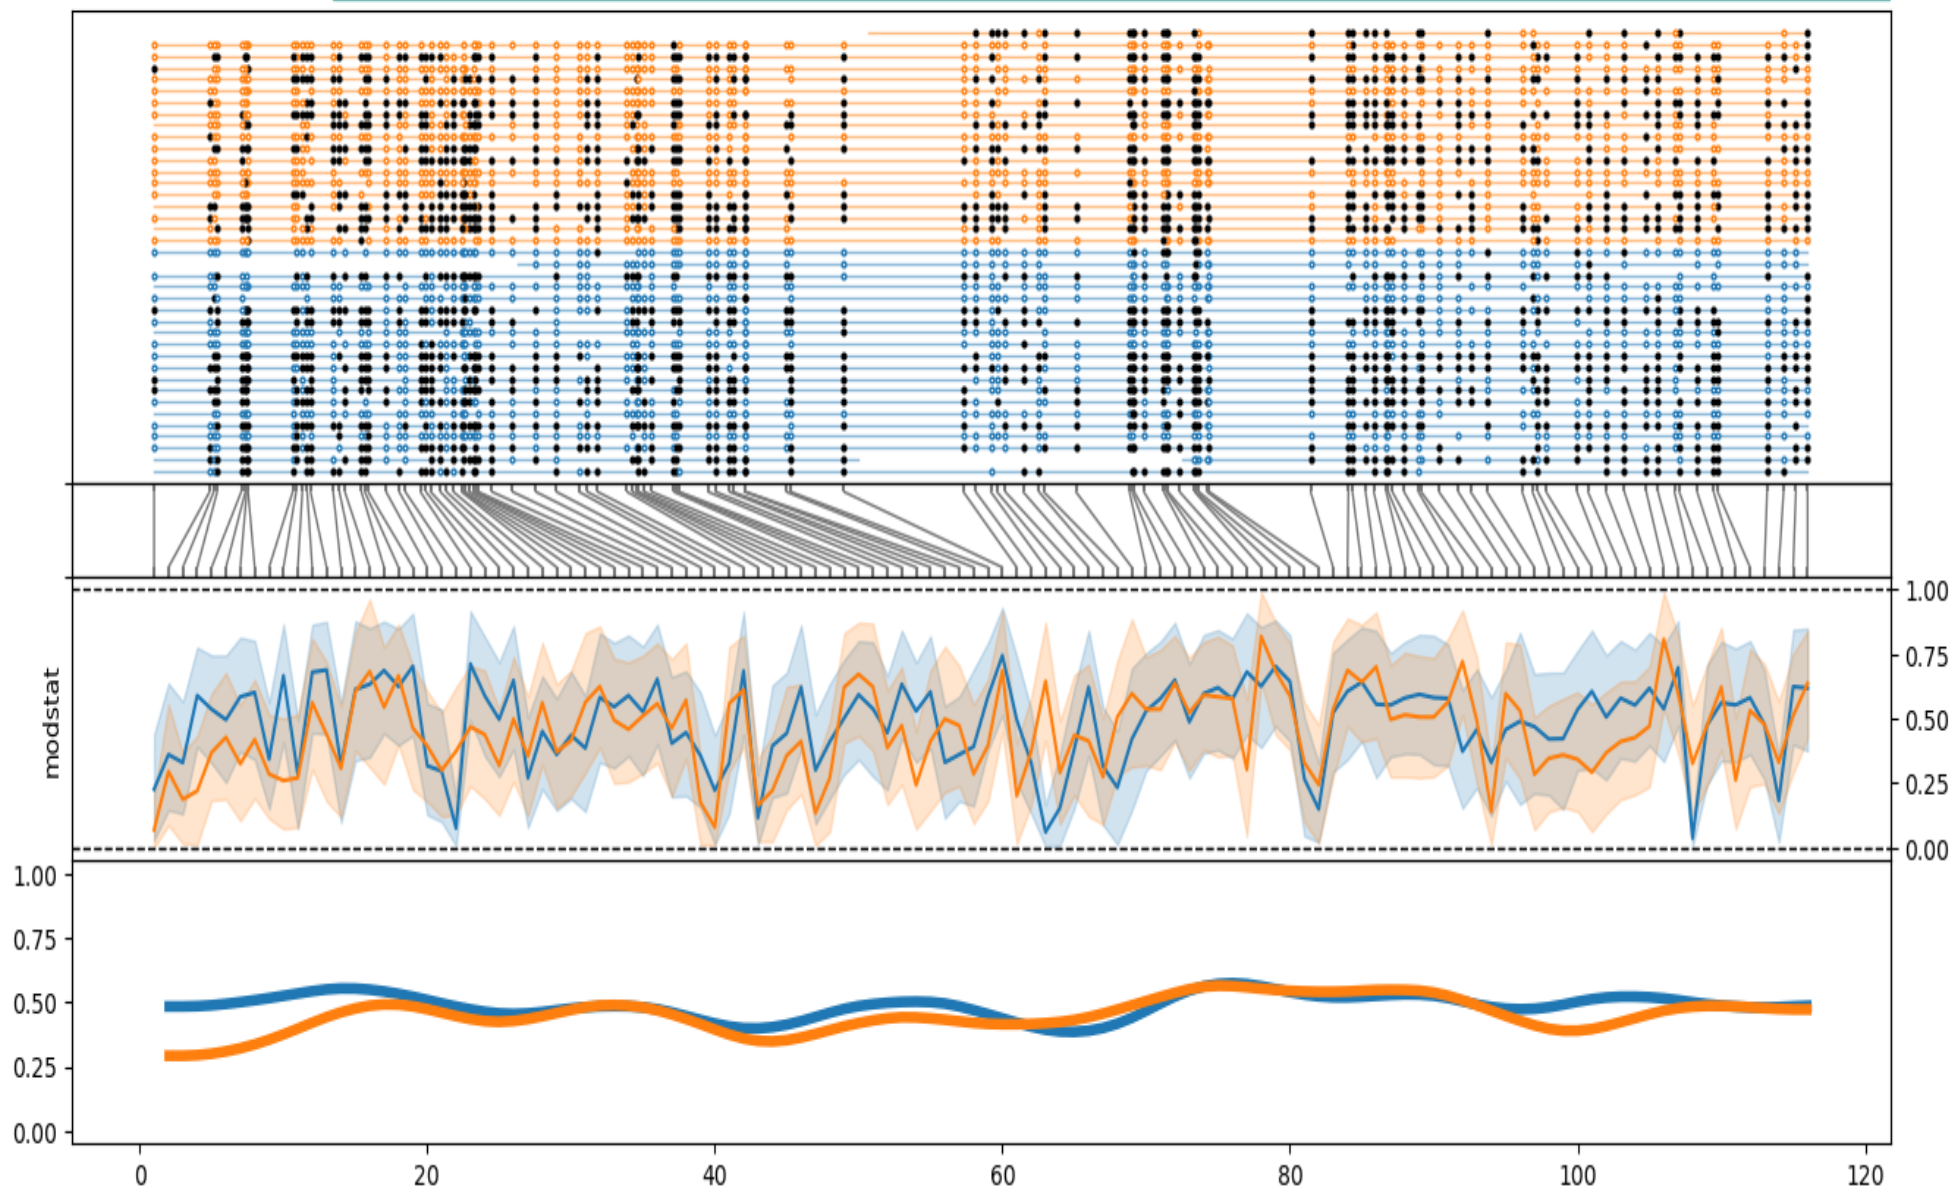

# EPI\_15\_hg38\_phased\_chr11\_1997509\_2003349

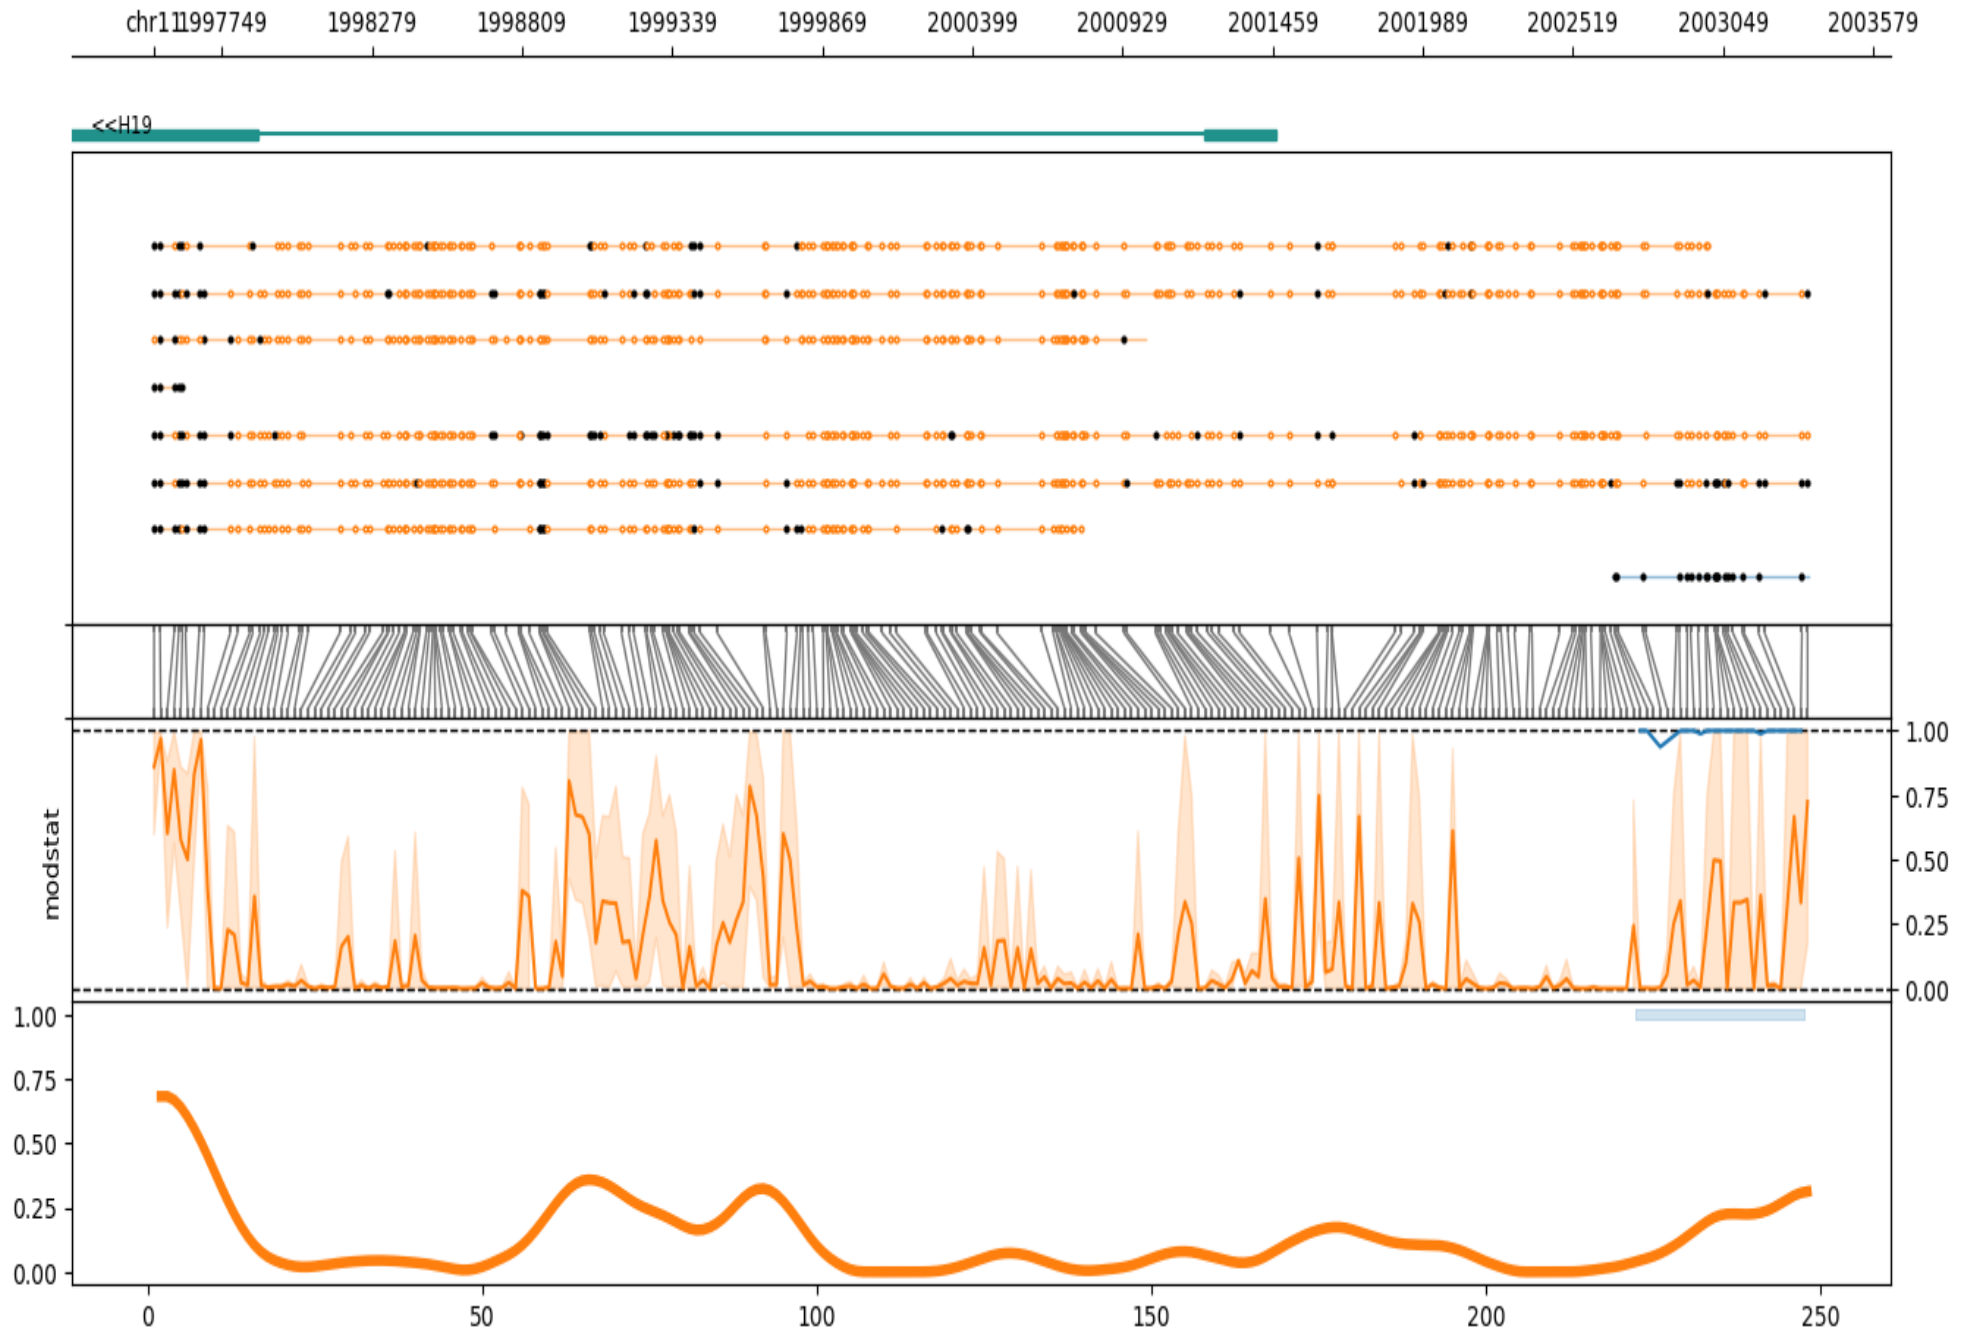

# EPI\_15\_hg38\_phased\_chr11\_2698155\_2701028

chr11 2698274 2698535 2698796 2699057 2699318 2699579 2699840 2700101 2700362 2700623 2700884 2701145

KCNQ1>>

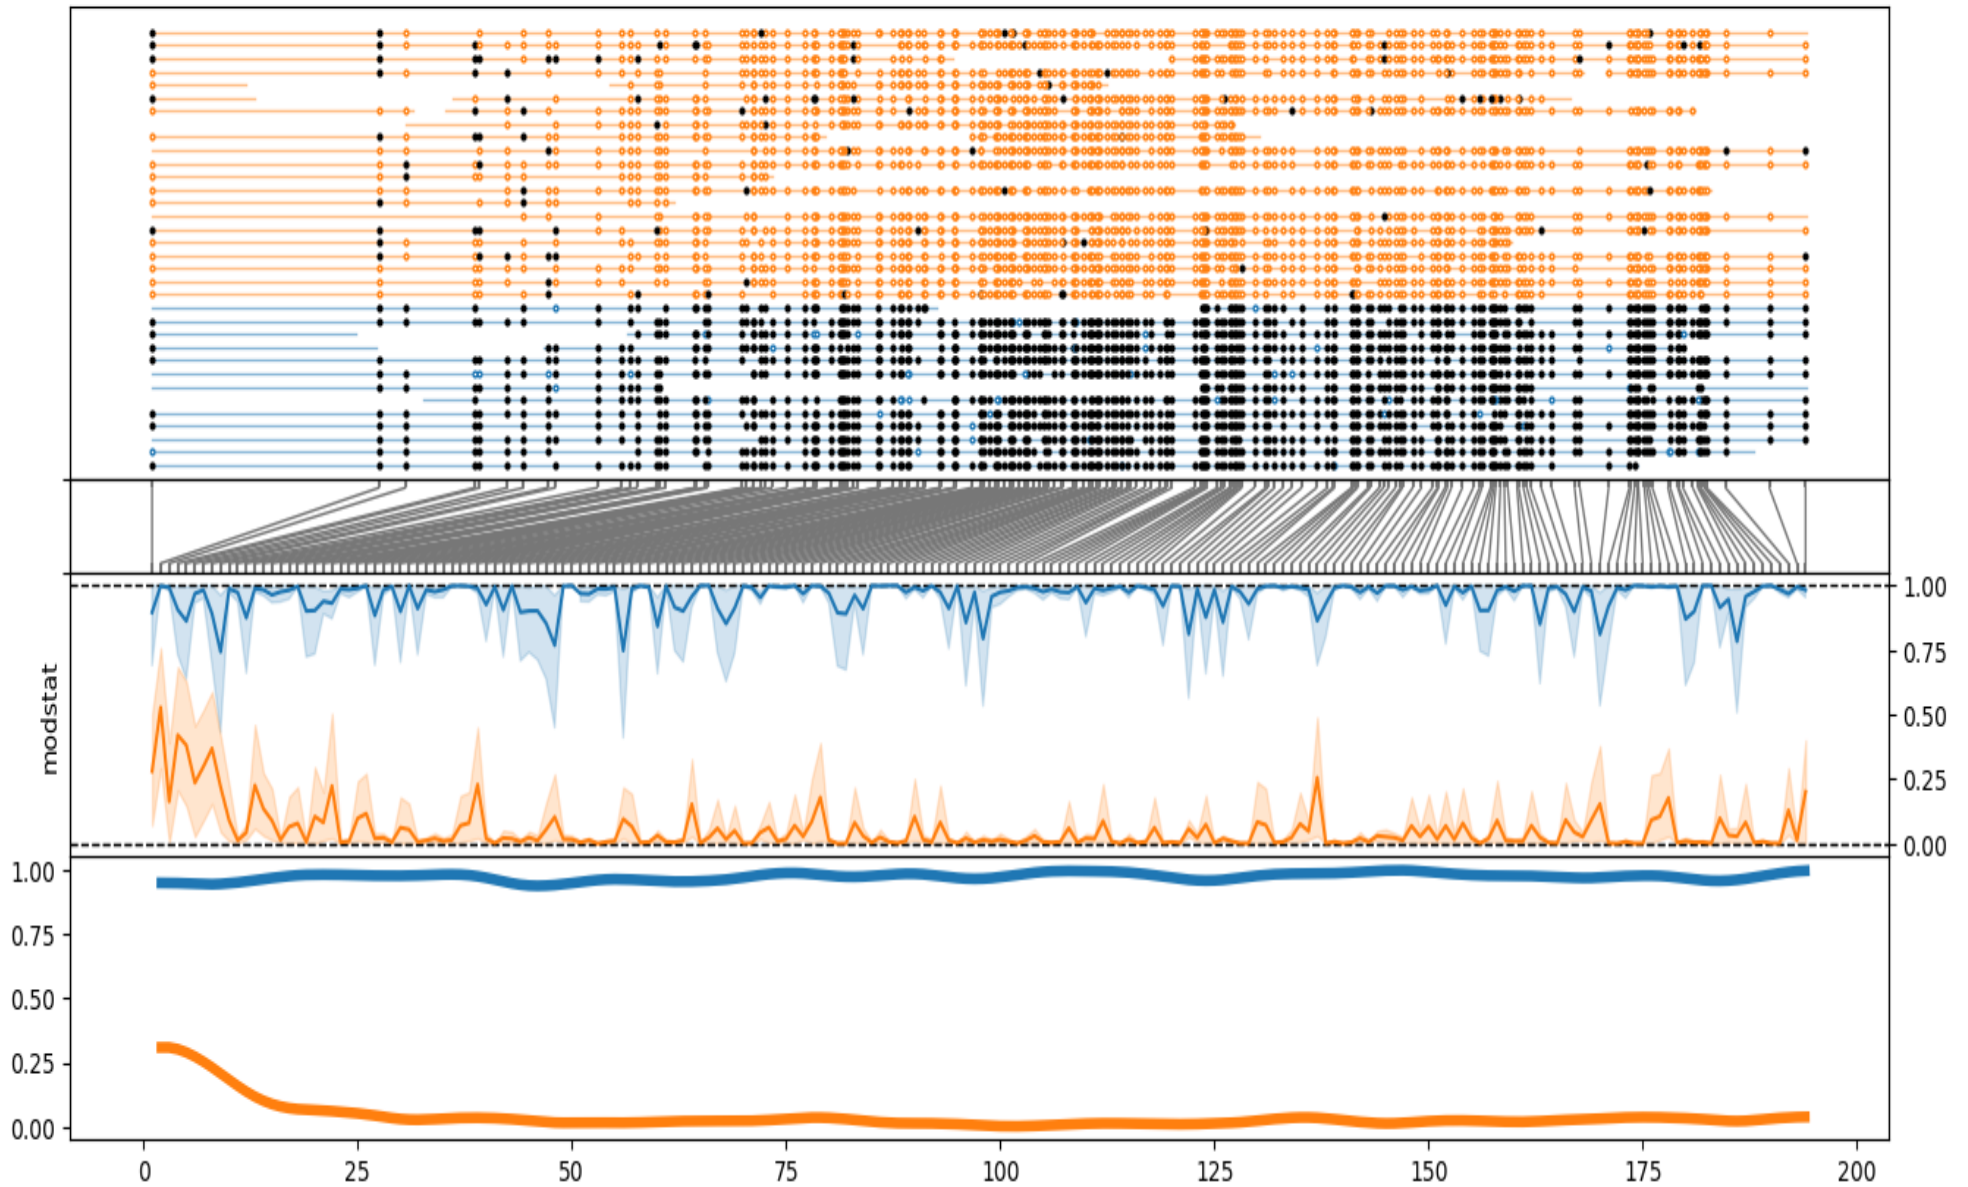

# EPI\_15\_hg38\_phased\_chrom14\_100824185\_100827640

chr14 100824328 100824642 100824956 100825270 100825584 100825898 100826212 100826526 100826840 100827154 100827468 100827782

MEG3>>

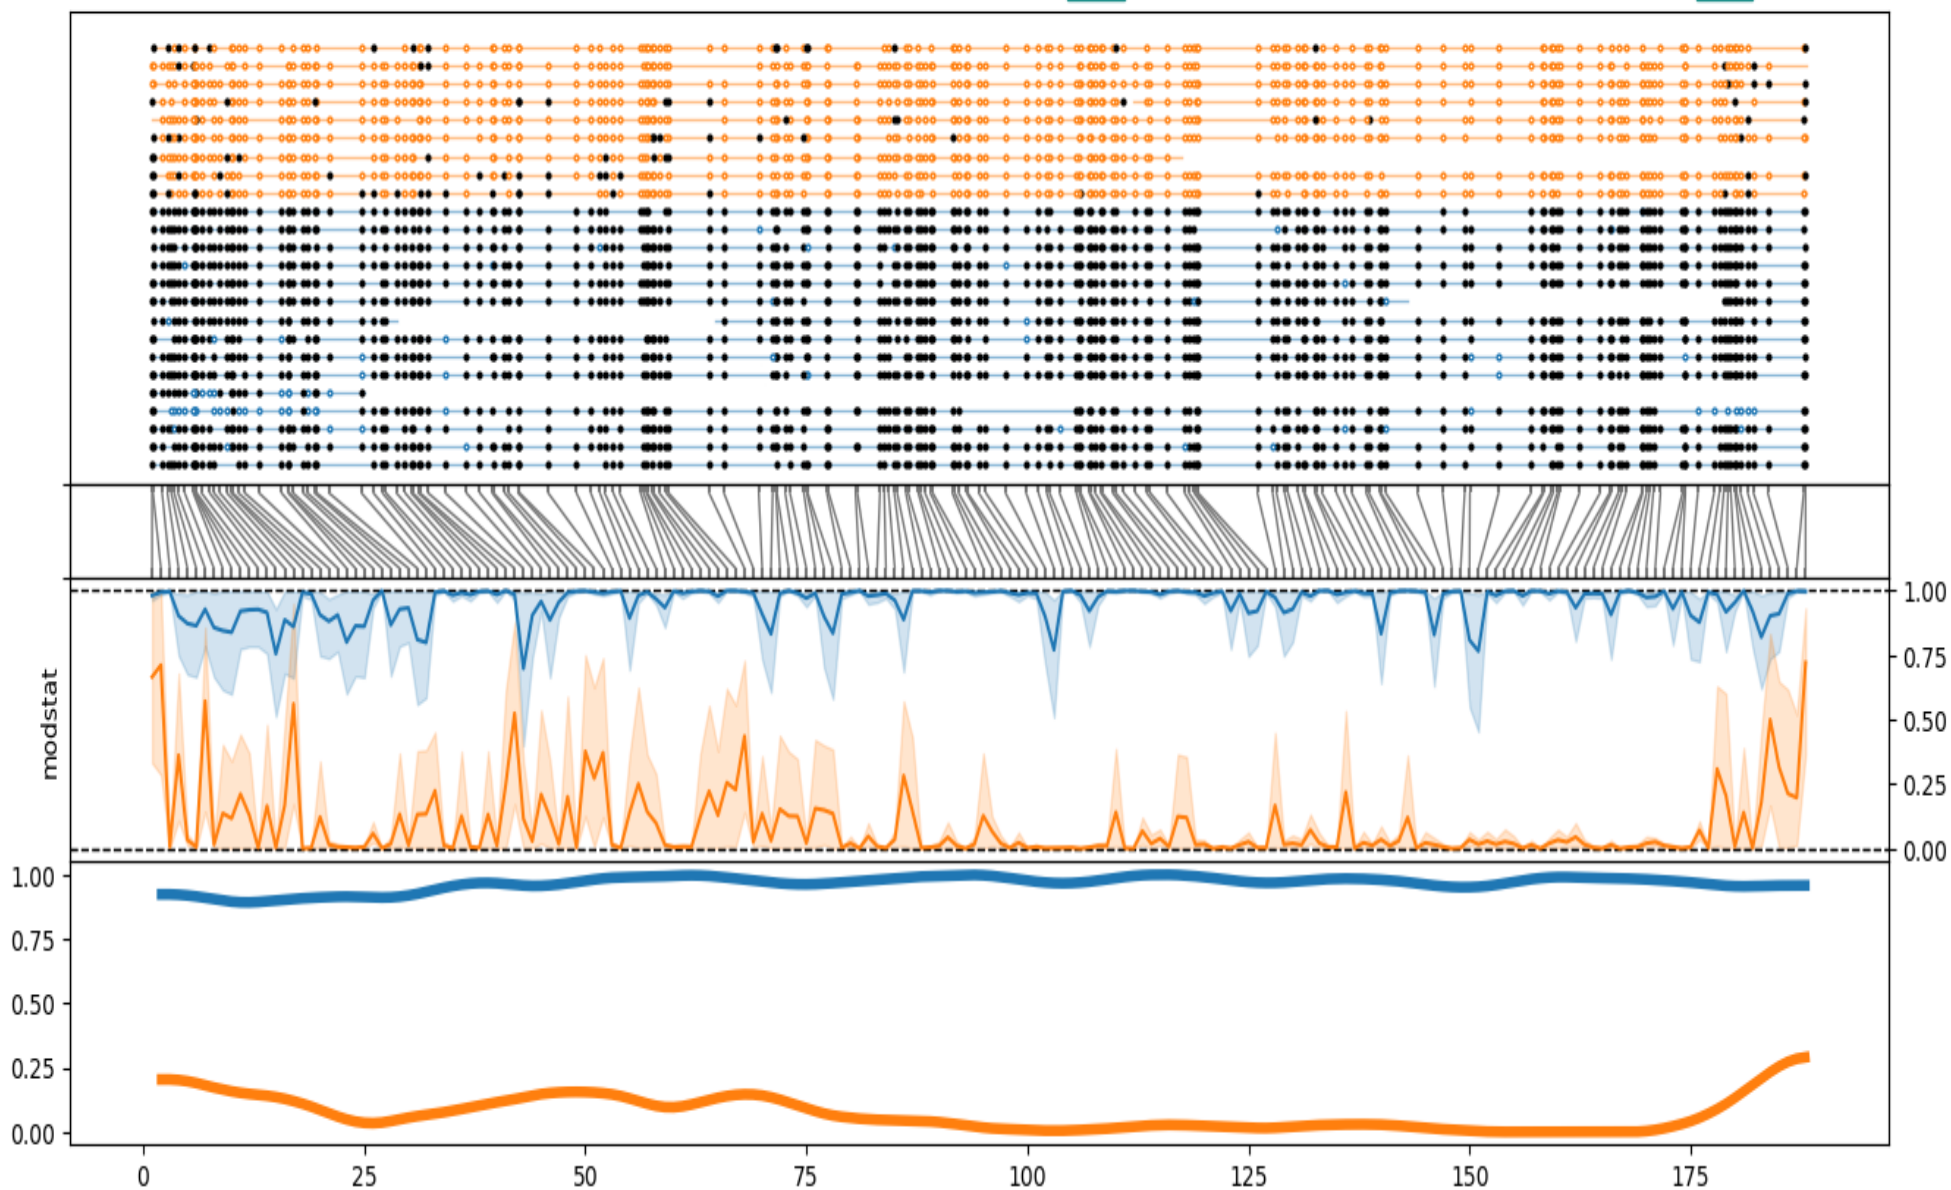



# EPI\_15\_hg38\_phased\_chr14\_100904325\_100905081

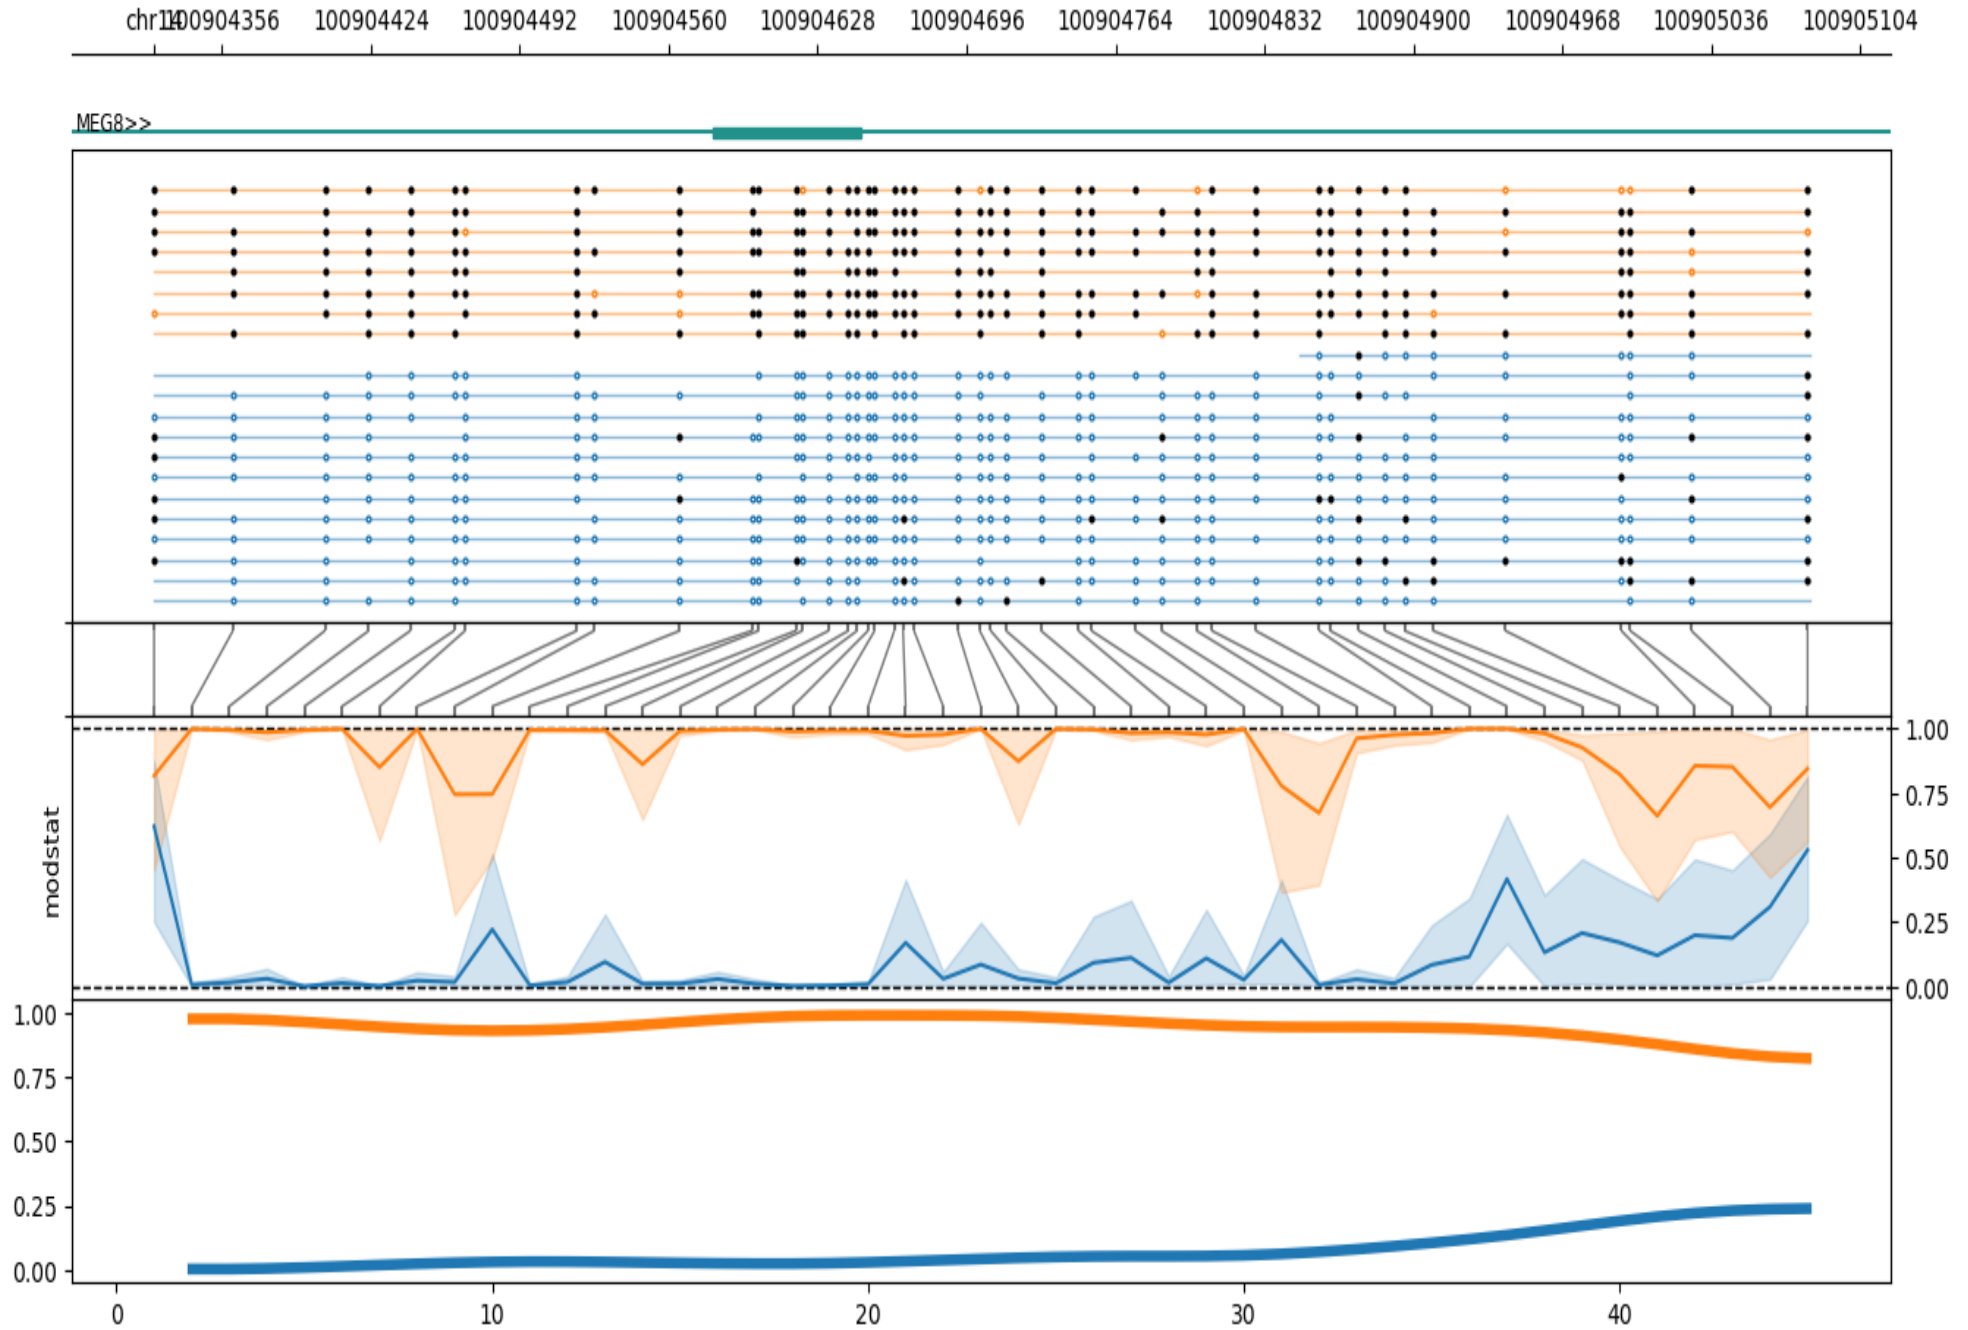

# EPI\_15\_hg38\_phased\_chr15\_23647178\_23648424

chr15:23647229 23647342 23647455 23647568 23647681 23647794 23647907 23648020 23648133 23648246 23648359 23648472

<<MAGEL2

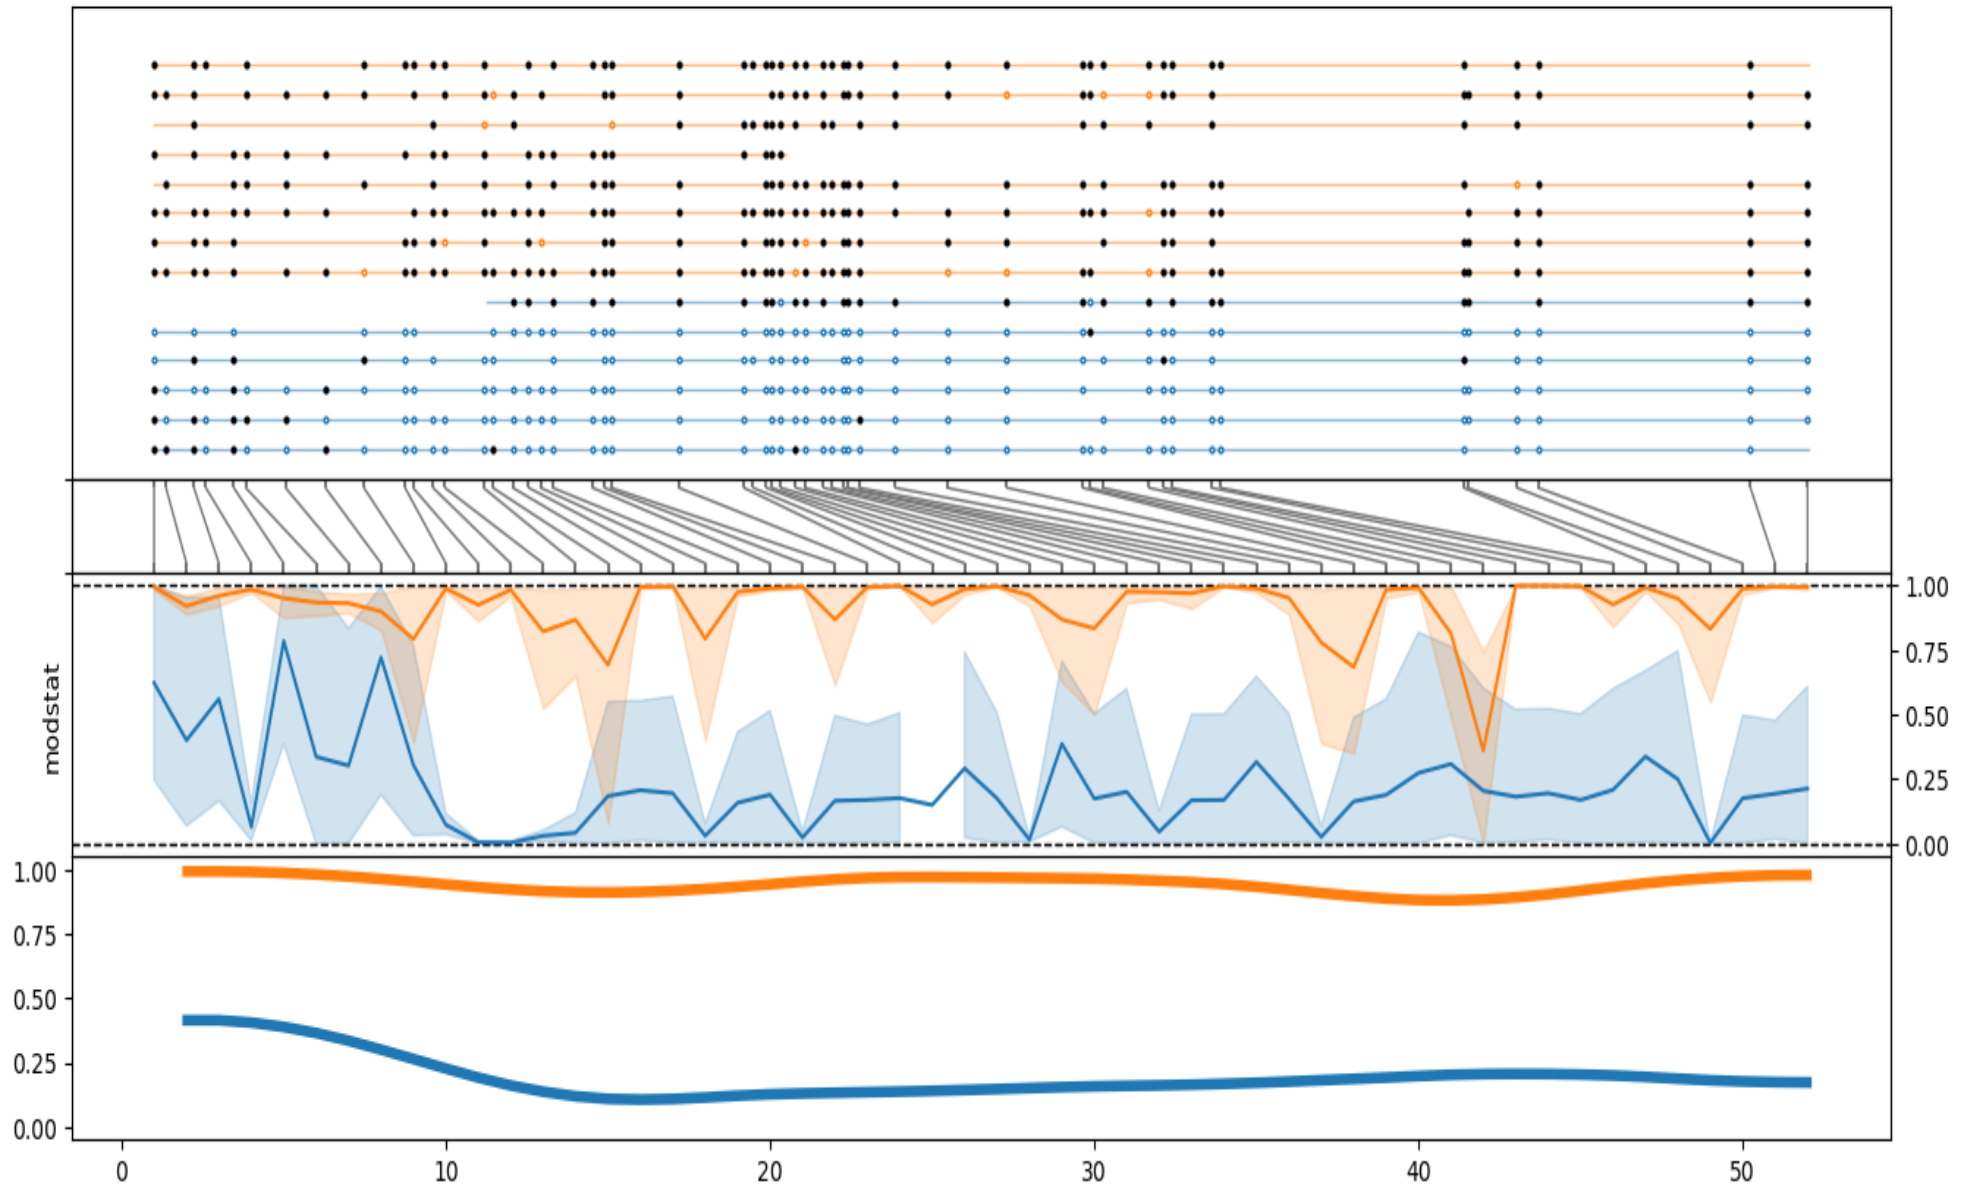

# EPI\_15\_hg38\_phased\_chr15\_24954564\_24956828

chr15 24954657 24954862 24955067 24955272 24955477 24955682 24955887 24956092 24956297 24956502 24956707 24956912

SNRPN>>

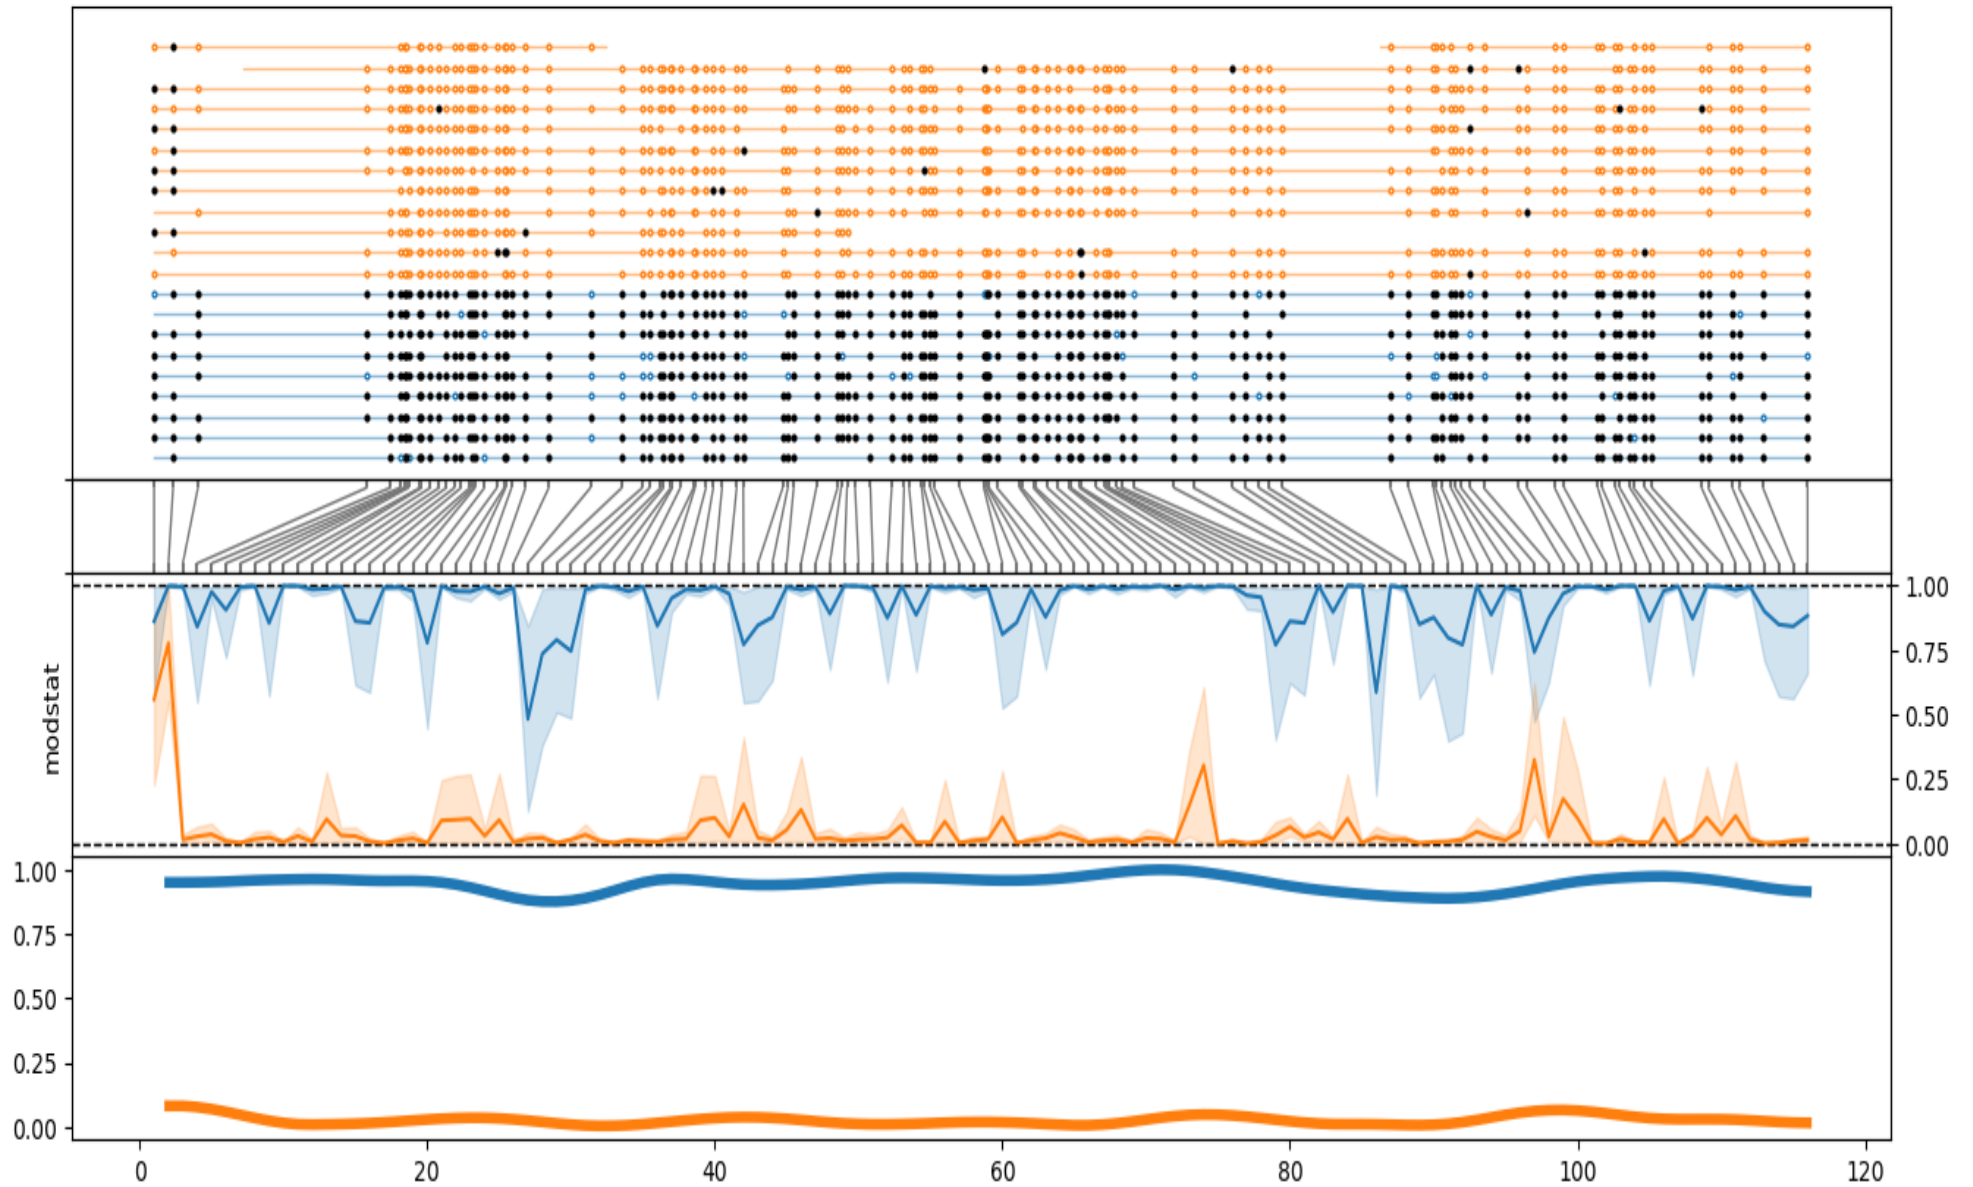

# EPI\_16\_hg38\_phased\_chr11\_1997509\_2003349

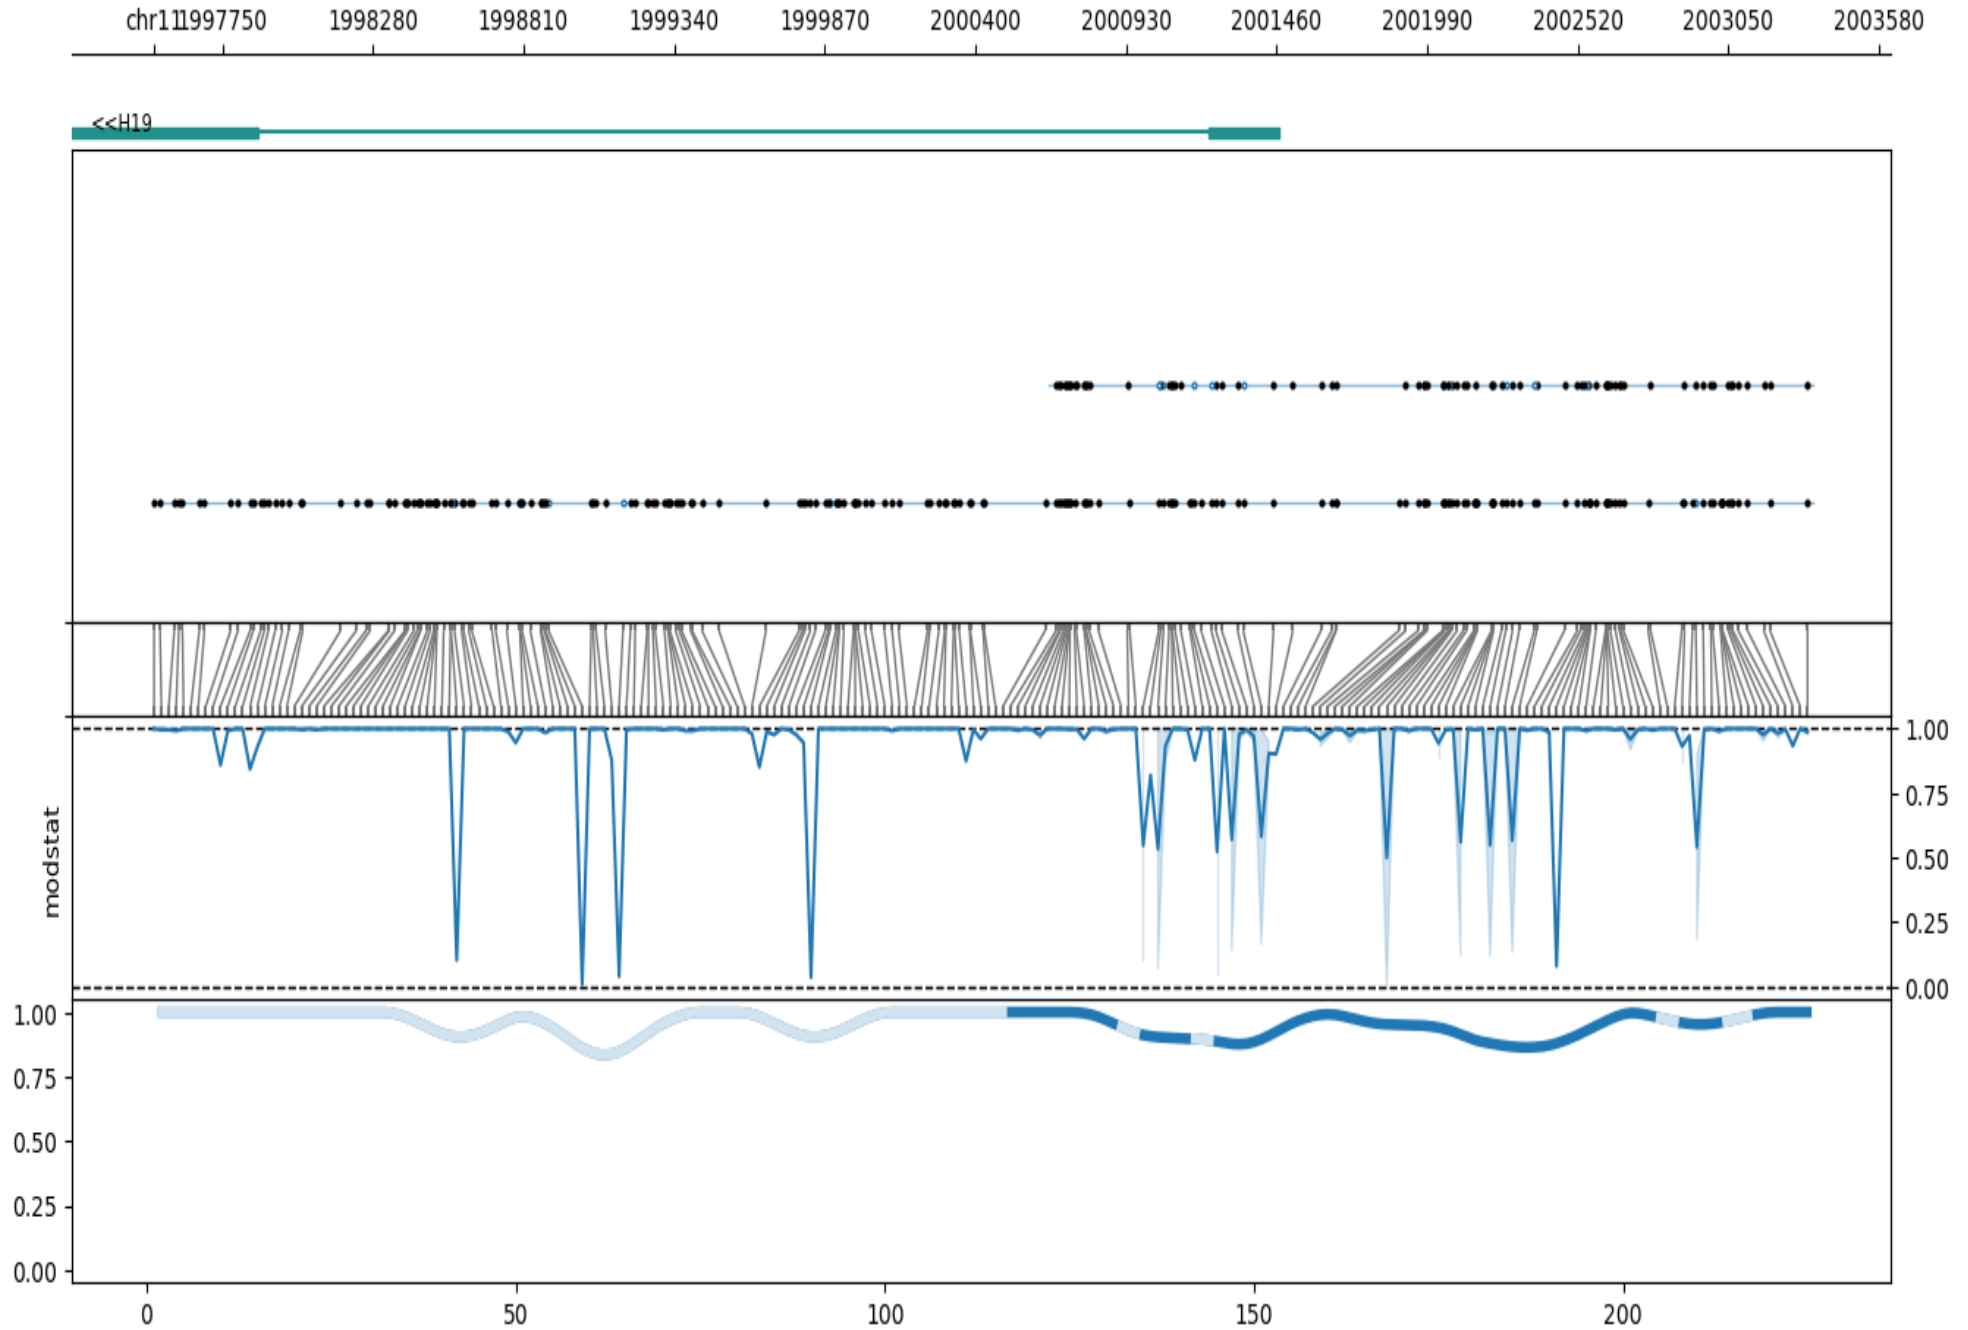



# EPI\_16\_hg38\_phased\_chr11\_2698155\_2701028

chr11 2698274 2698535 2698796 2699057 2699318 2699579 2699840 2700101 2700362 2700623 2700884 2701145

KCNQ1>>

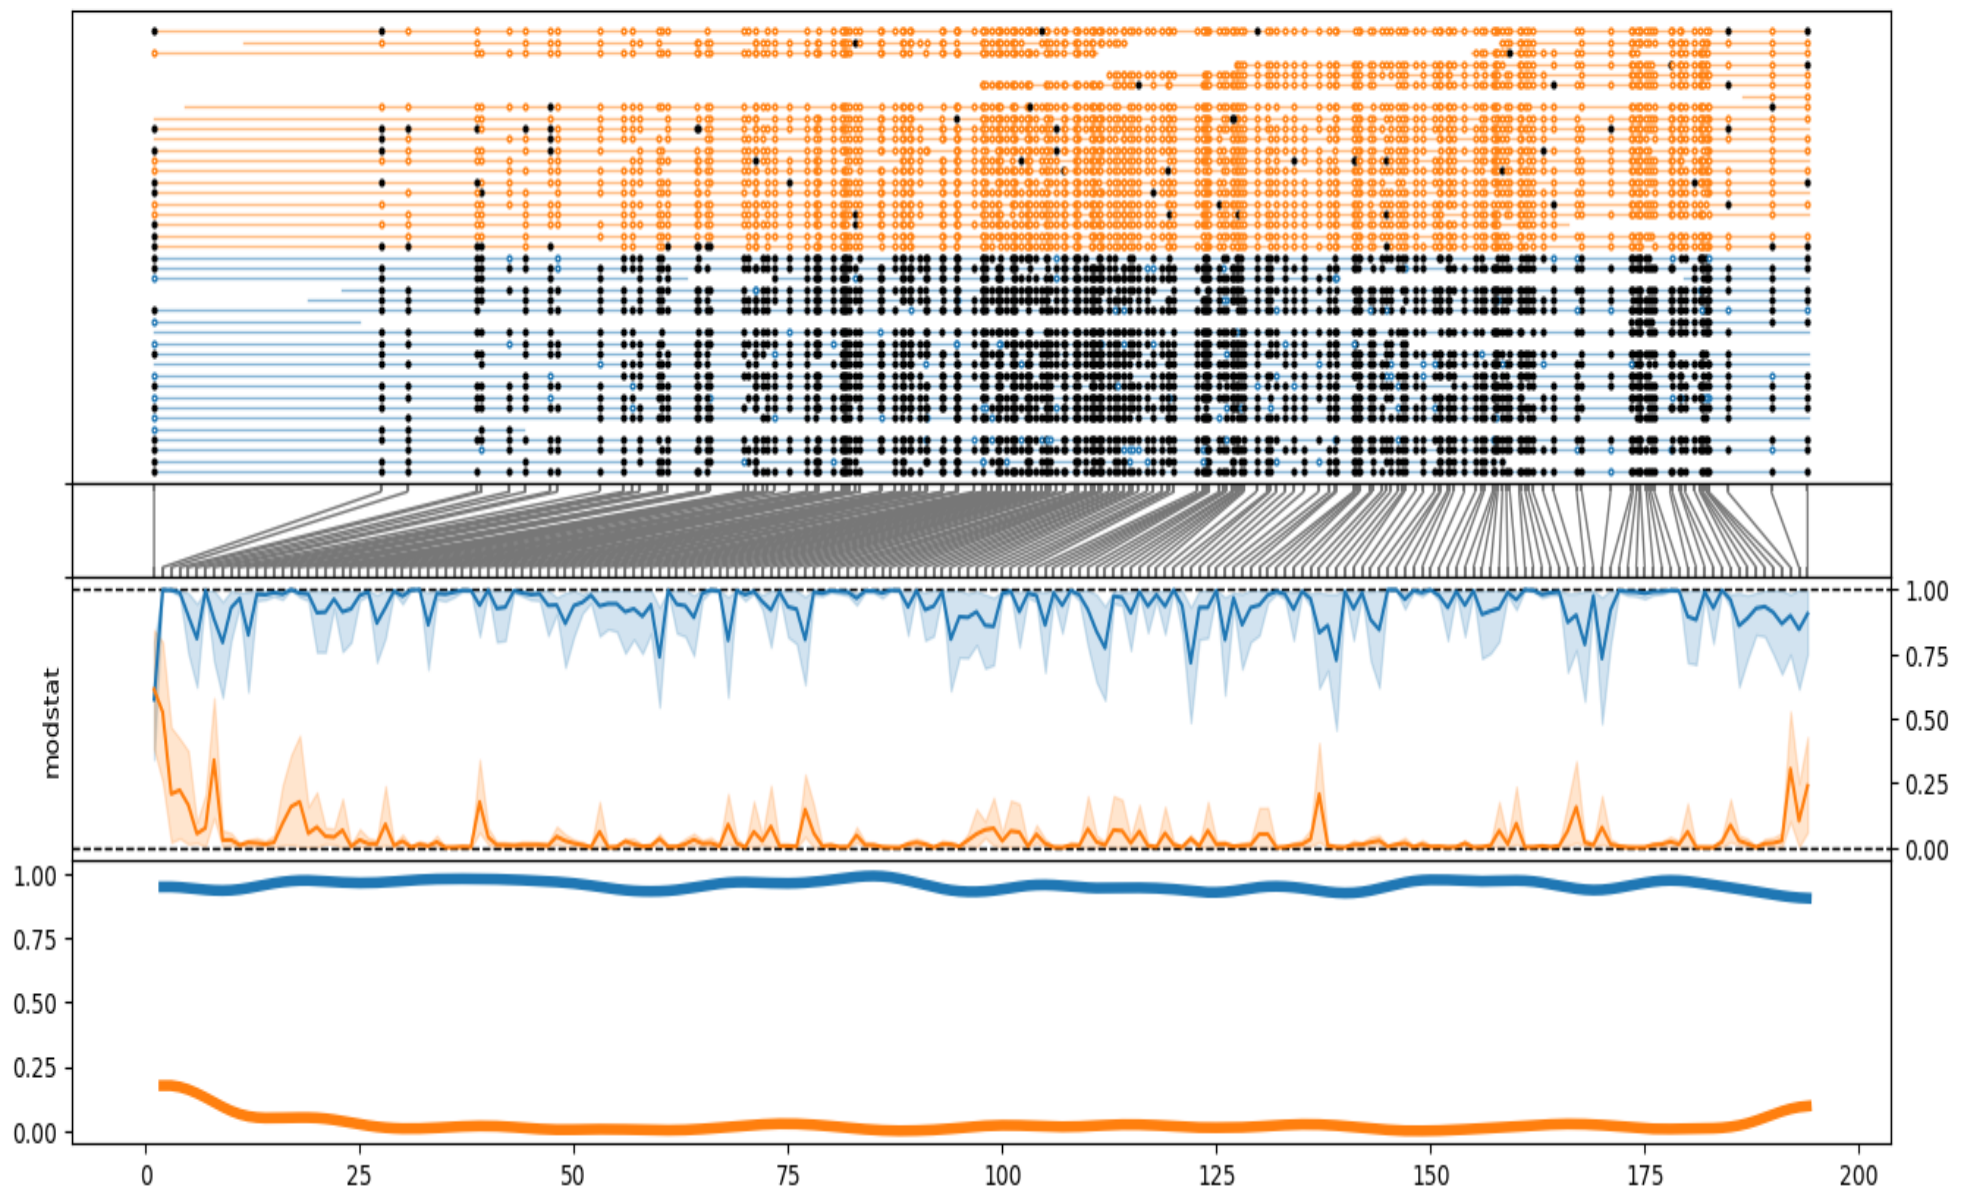

# EPI\_16\_hg38\_phased\_chr14\_100824185\_100827640

chr14 100824328 100824642 100824956 100825270 100825584 100825898 100826212 100826526 100826840 100827154 100827468 100827782

MEG3>>

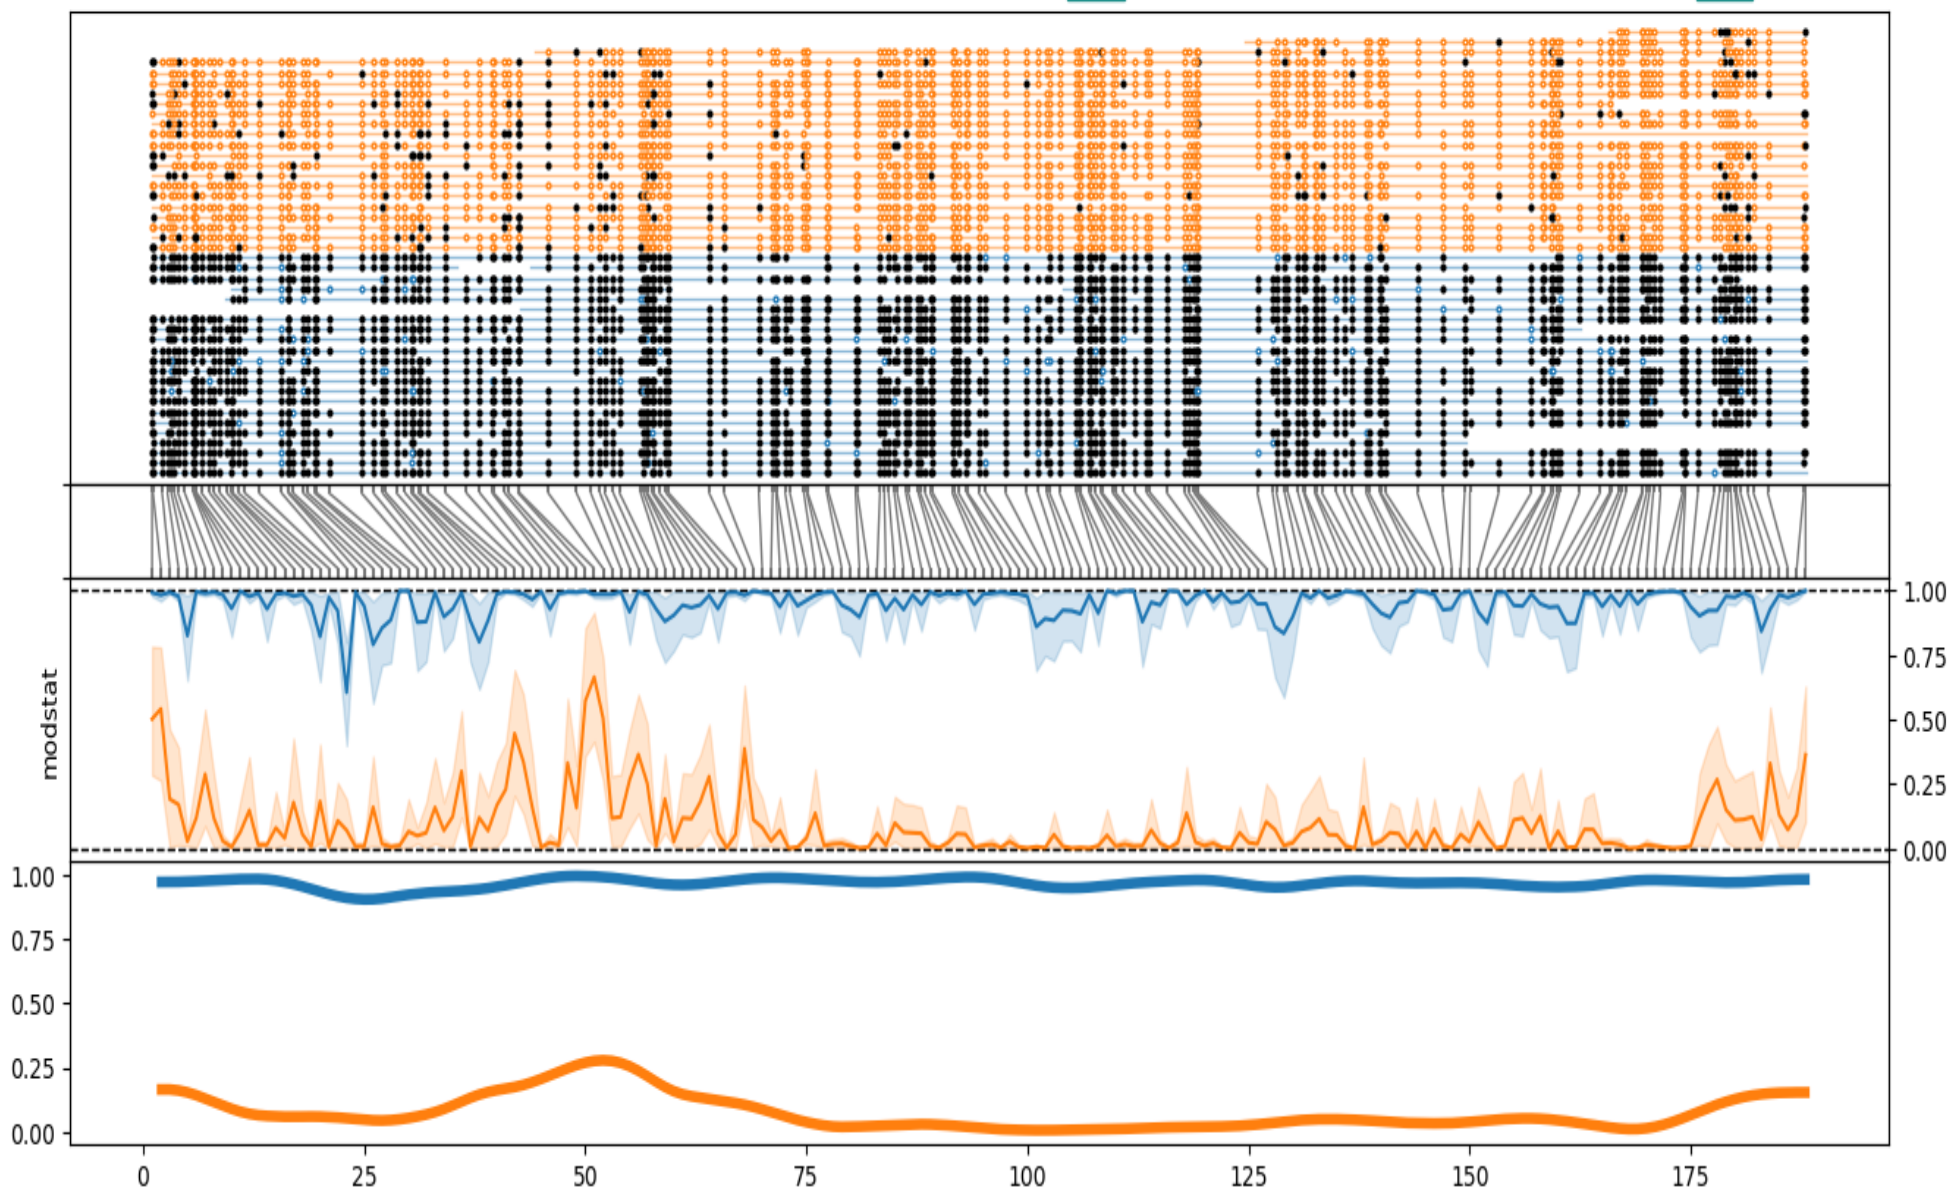

# EPI\_16\_hg38\_phased\_chr14\_100904325\_100905081

chr14 100904356 100904424 100904492 100904560 100904628 100904696 100904764 100904832 100904900 100904968 100905036 100905104

MEG8>>

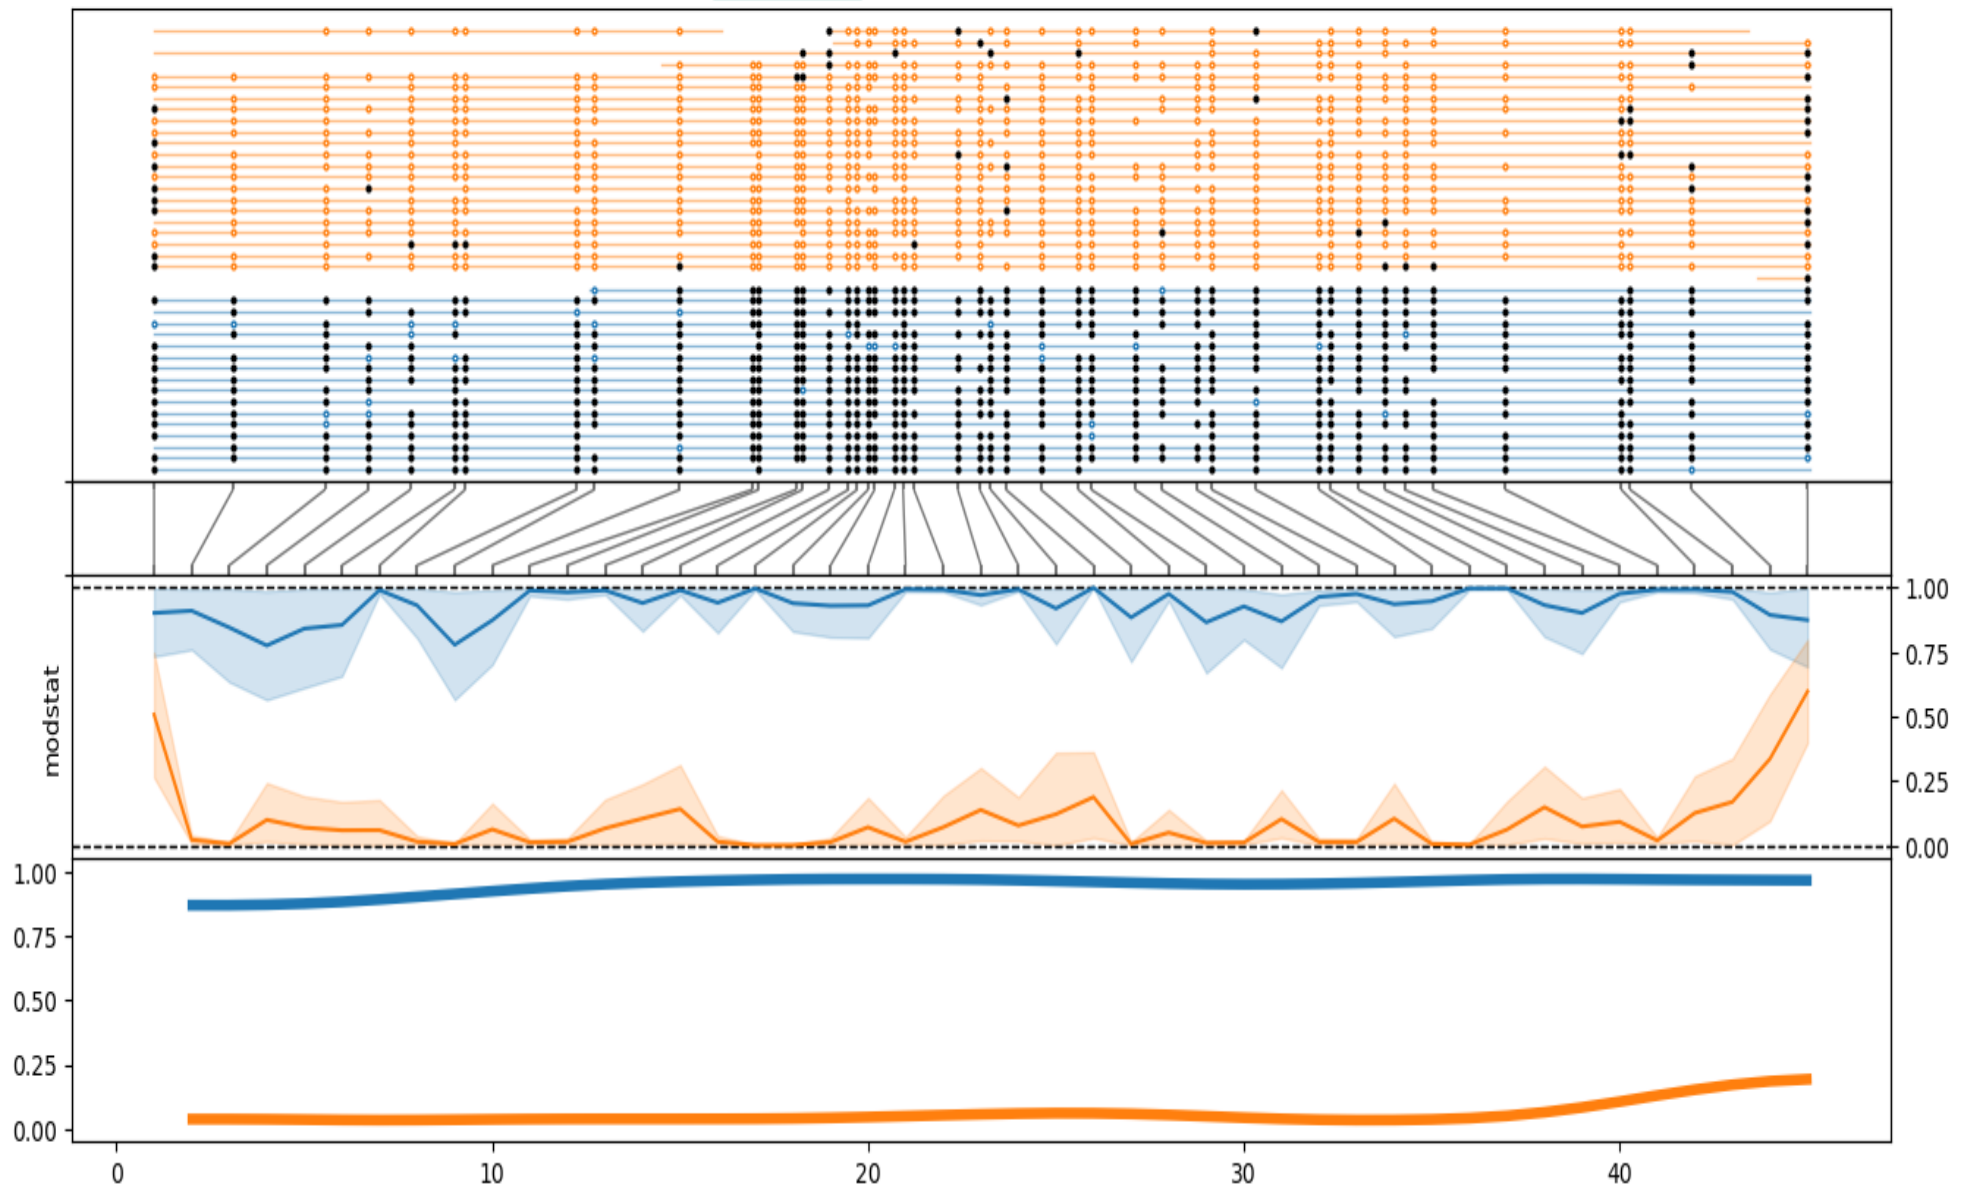

# EPI\_16\_hg38\_phased\_chr15\_23647178\_23648424

chr15 23647229 23647342 23647455 23647568 23647681 23647794 23647907 23648020 23648133 23648246 23648359 23648472

<<MAGEL2

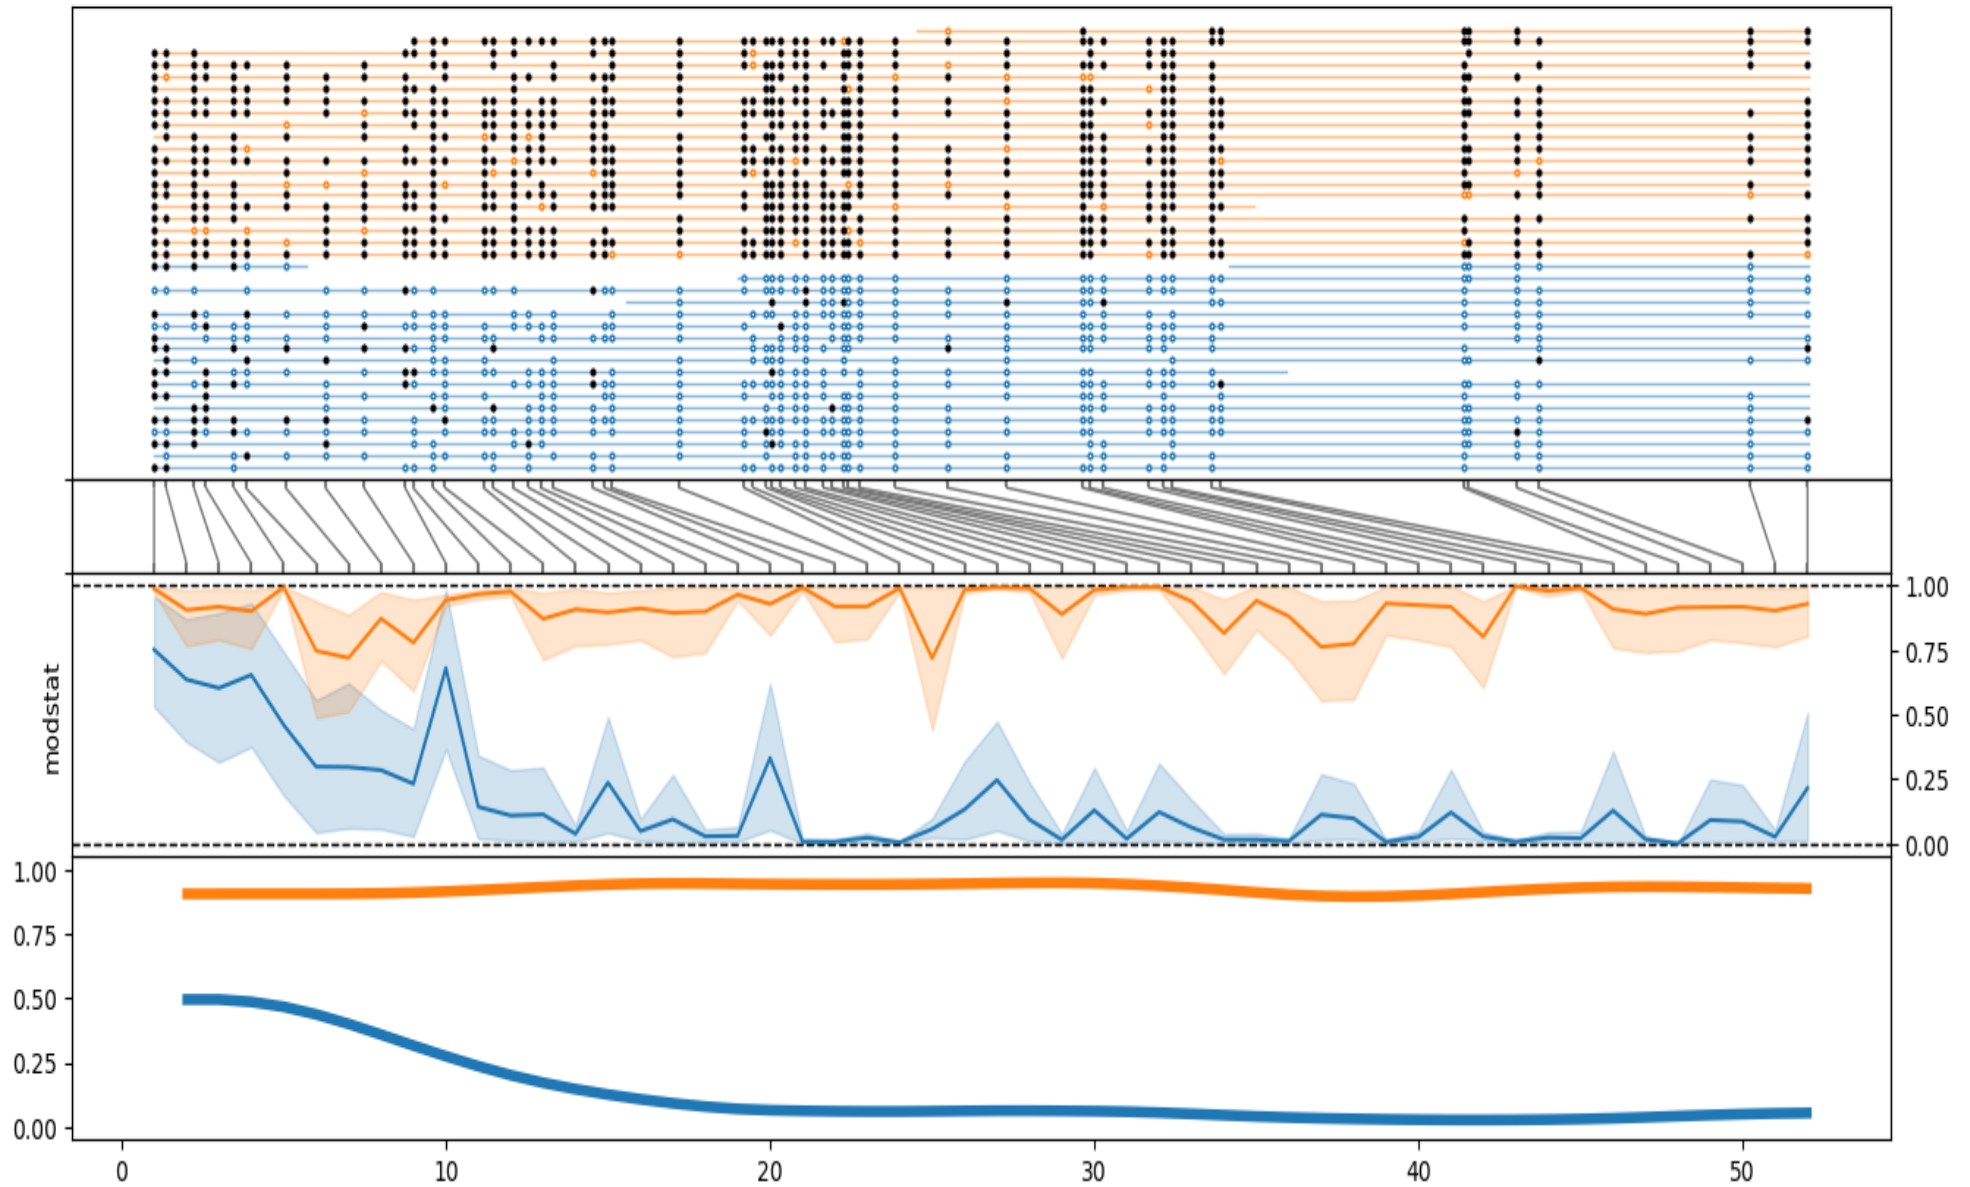



# EPI\_16\_hg38\_phased\_chr15\_24954564\_24956828

chr15:24954657 24954862 24955067 24955272 24955477 24955682 24955887 24956092 24956297 24956502 24956707 24956912

SNRPN>>

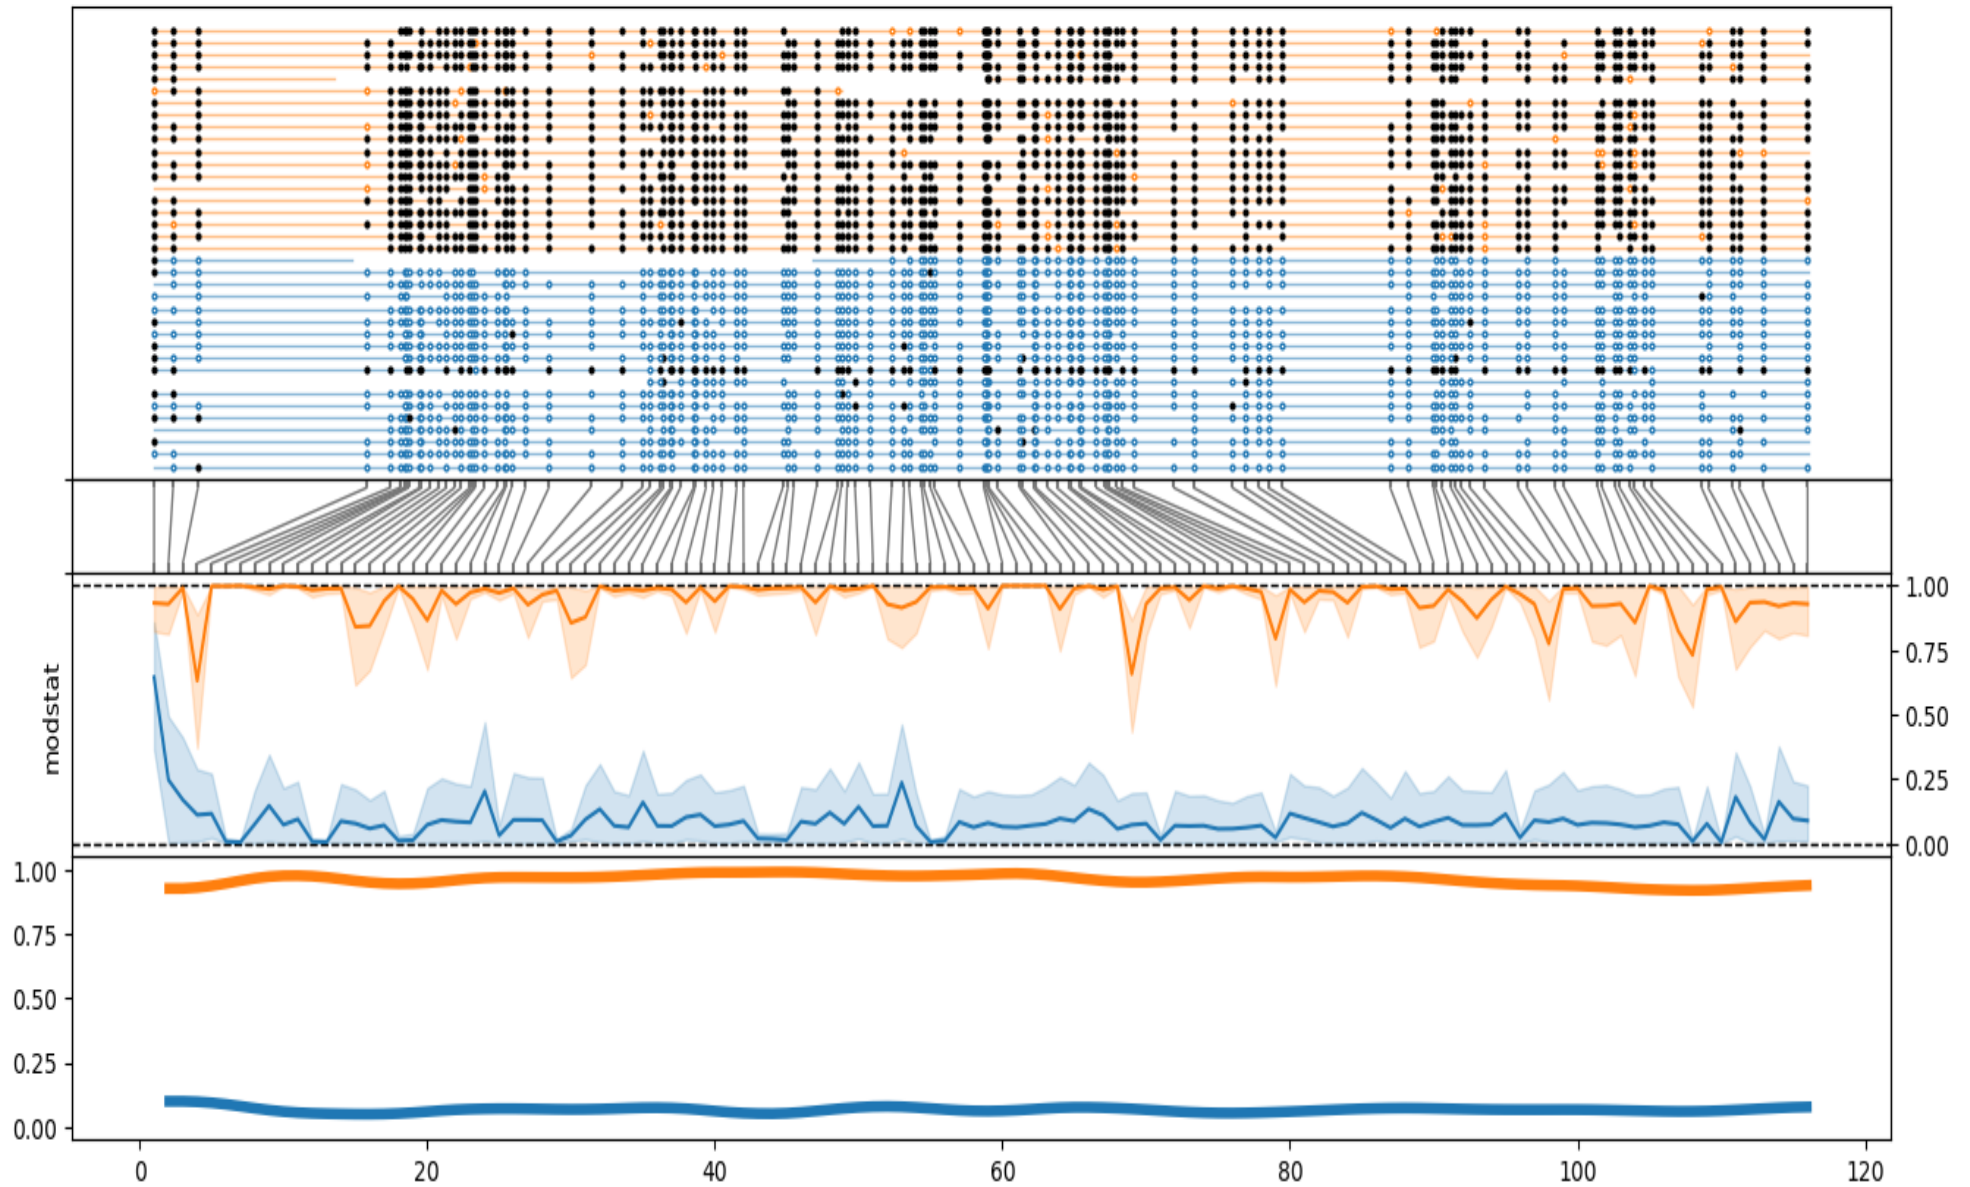

# EPI\_17\_hg38\_phased\_chr11\_1997509\_2003349

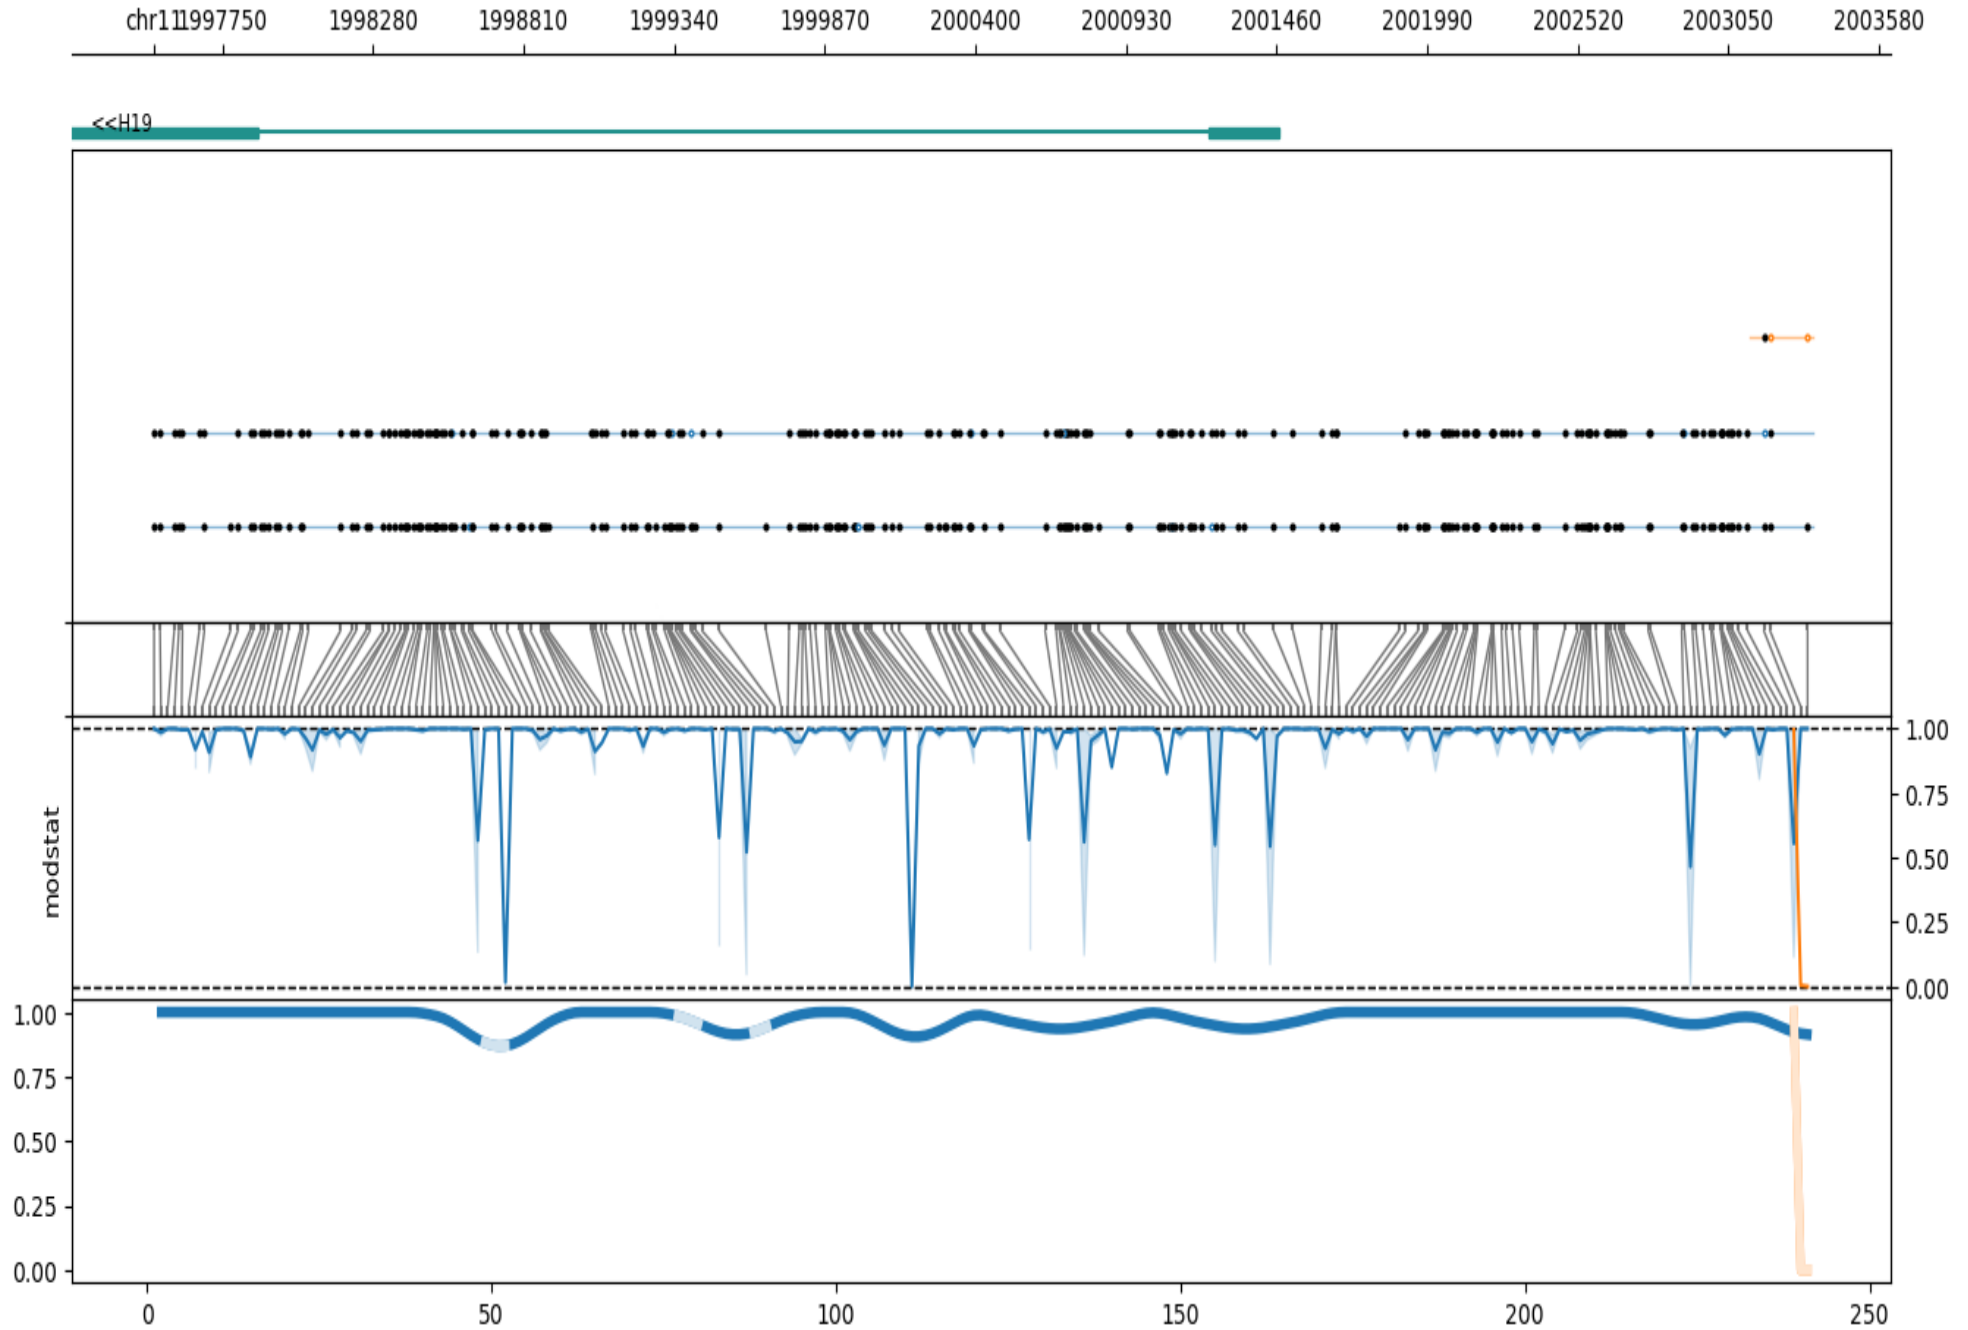

# EPI\_17\_hg38\_phased\_chr11\_2698155\_2701028

chr11:2698274 2698535 2698796 2699057 2699318 2699579 2699840 2700101 2700362 2700623 2700884 2701145

KCNQ1>>

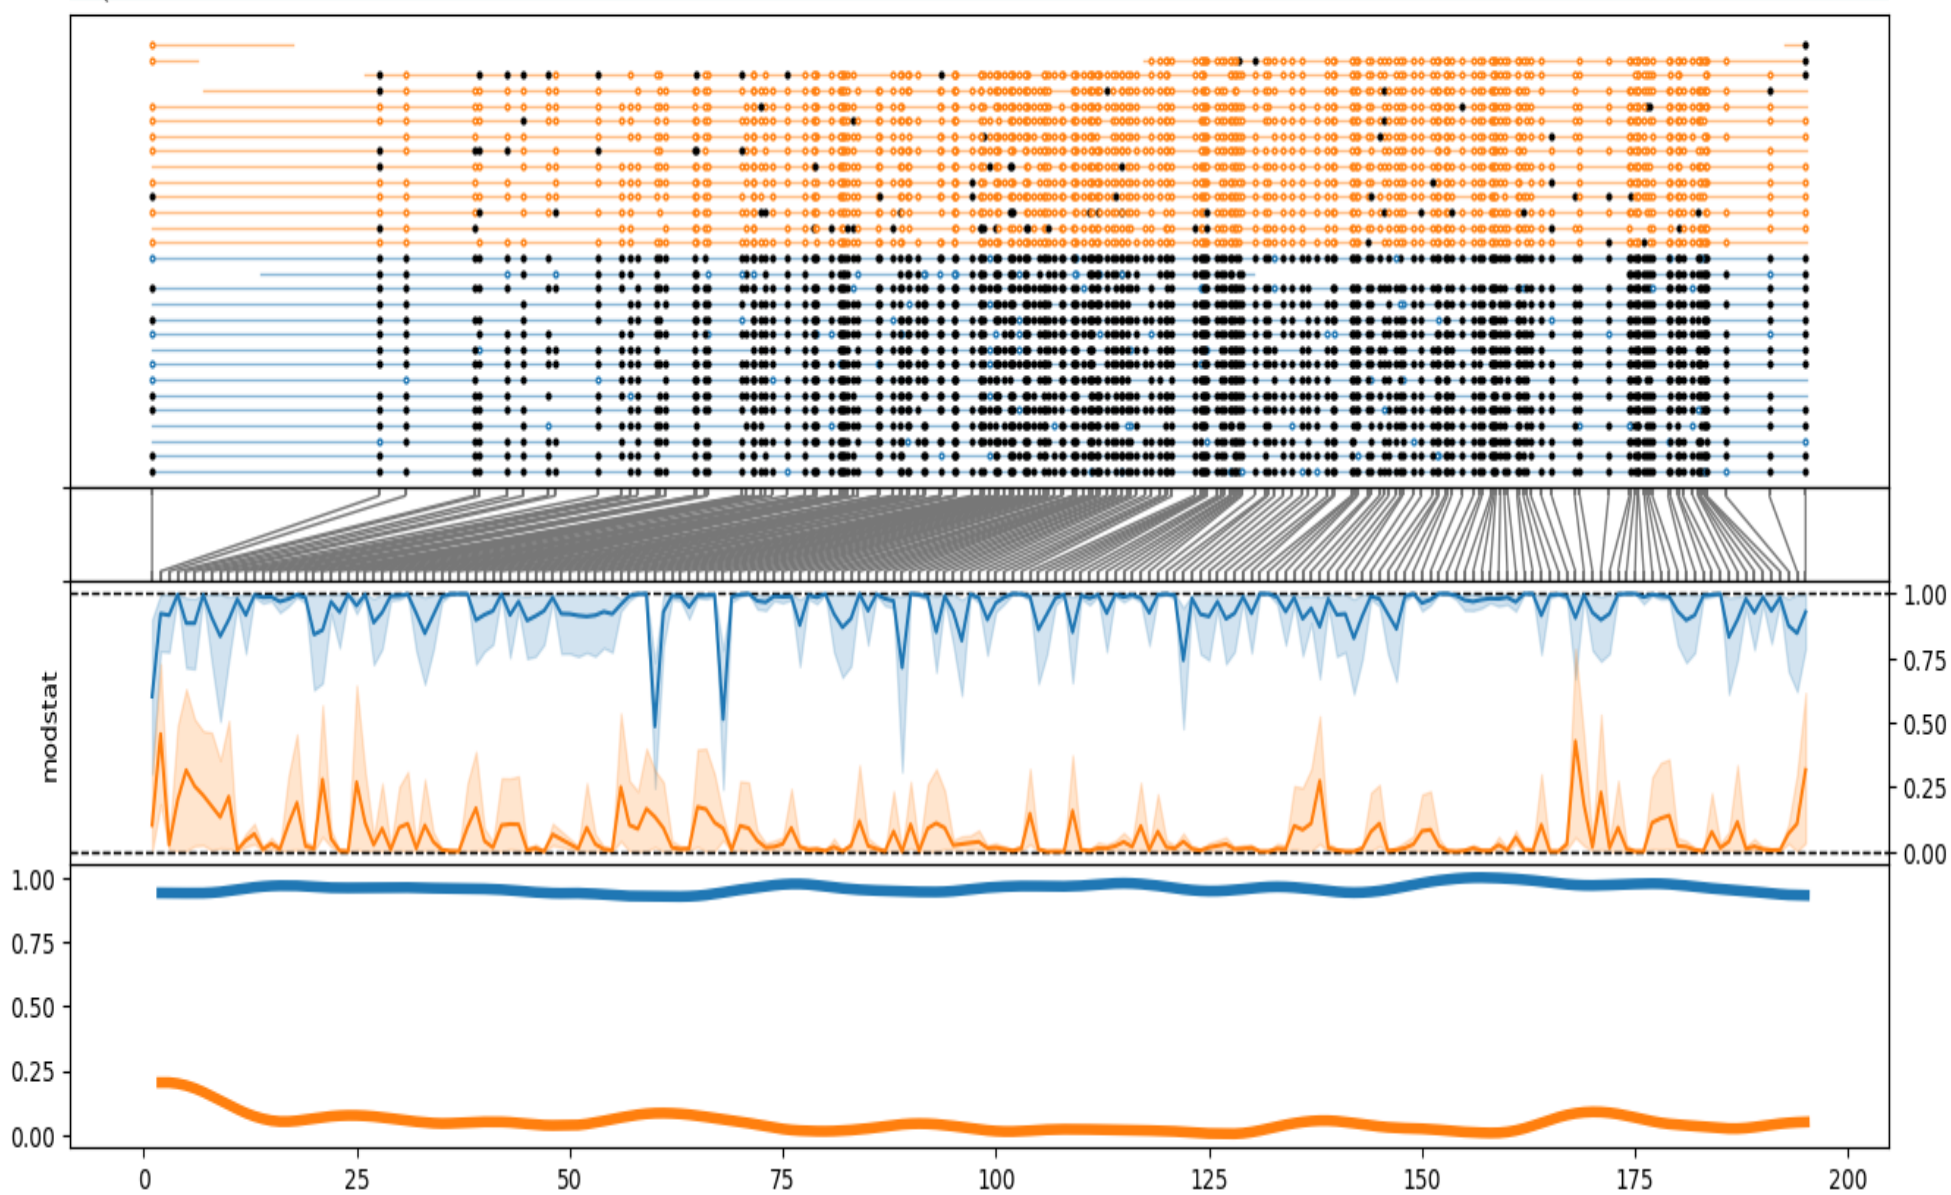

# EPI\_17\_hg38\_phased\_chr14\_100824185\_100827640

chr14 100824328 100824642 100824956 100825270 100825584 100825898 100826212 100826526 100826840 100827154 100827468 100827782

MEG3>>

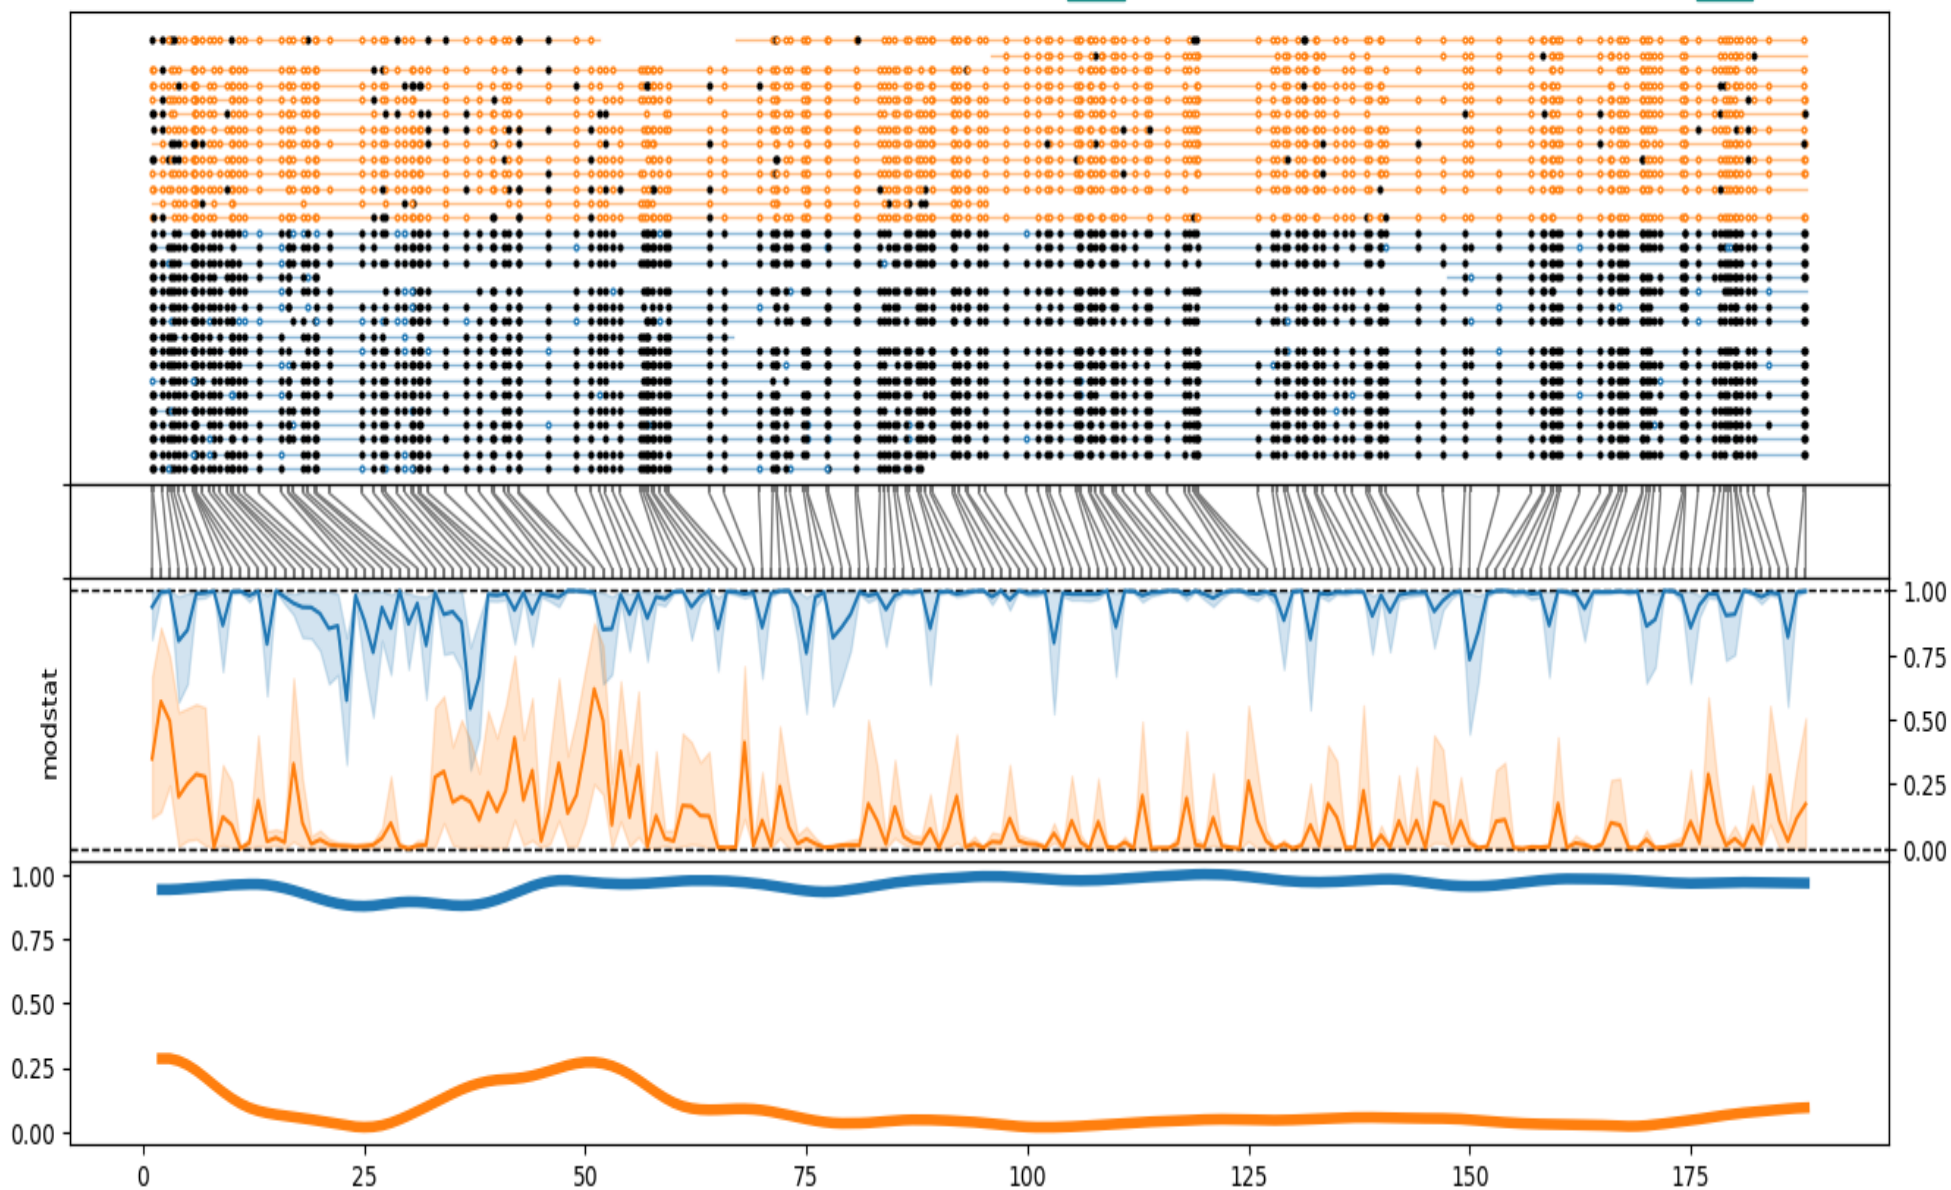



# EPI\_17\_hg38\_phased\_chr14\_100904325\_100905081

chr14 100904356 100904424 100904492 100904560 100904628 100904696 100904764 100904832 100904900 100904968 100905036 100905104

MEG8>>

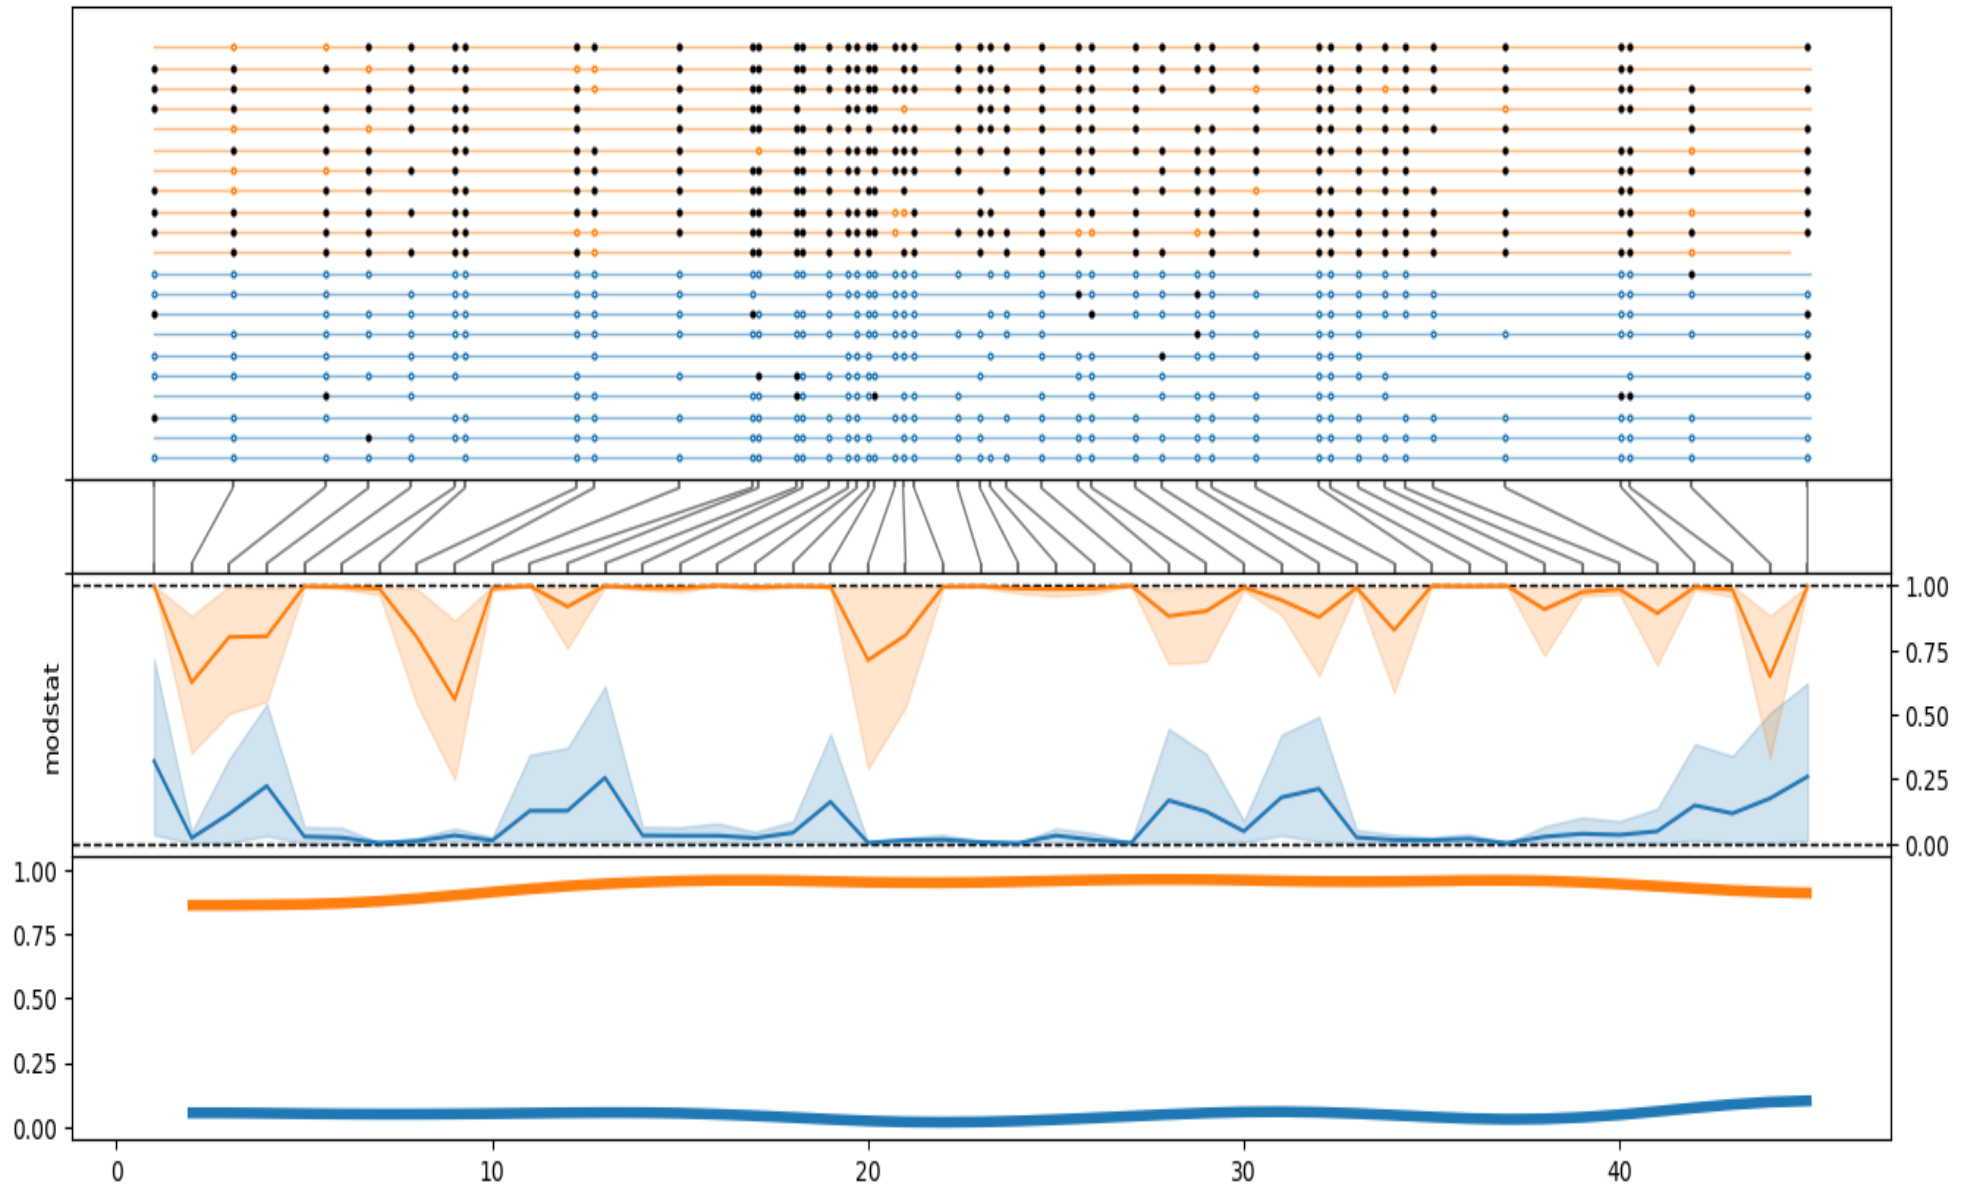

# EPI\_17\_hg38\_phased\_chr15\_23647178\_23648424

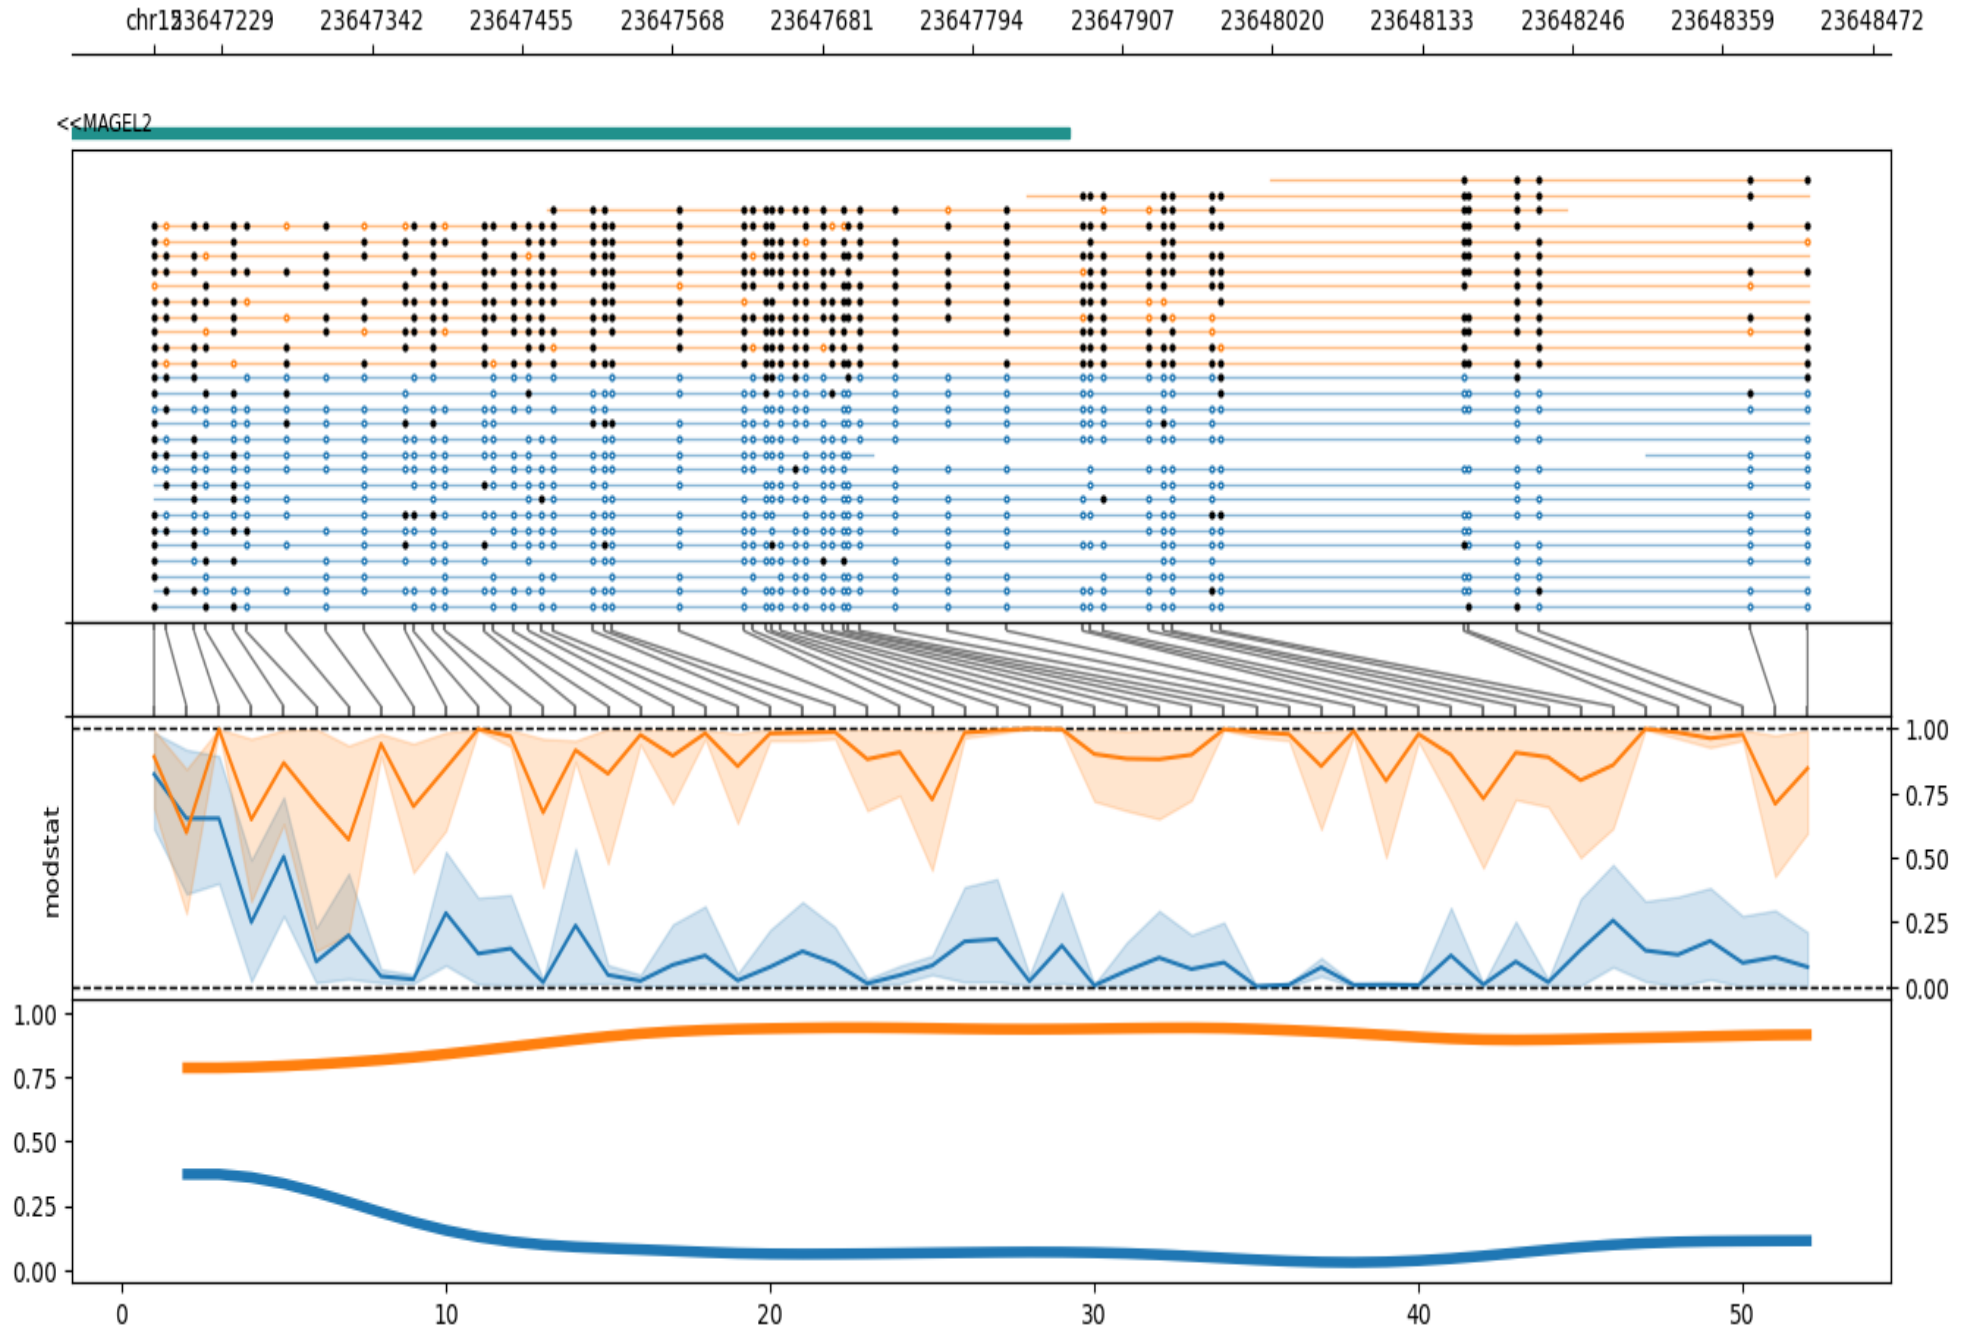

# EPI\_17\_hg38\_phased\_chr15\_24954564\_24956828

chr15:24954657 24954862 24955067 24955272 24955477 24955682 24955887 24956092 24956297 24956502 24956707 24956912

SNRPN>>

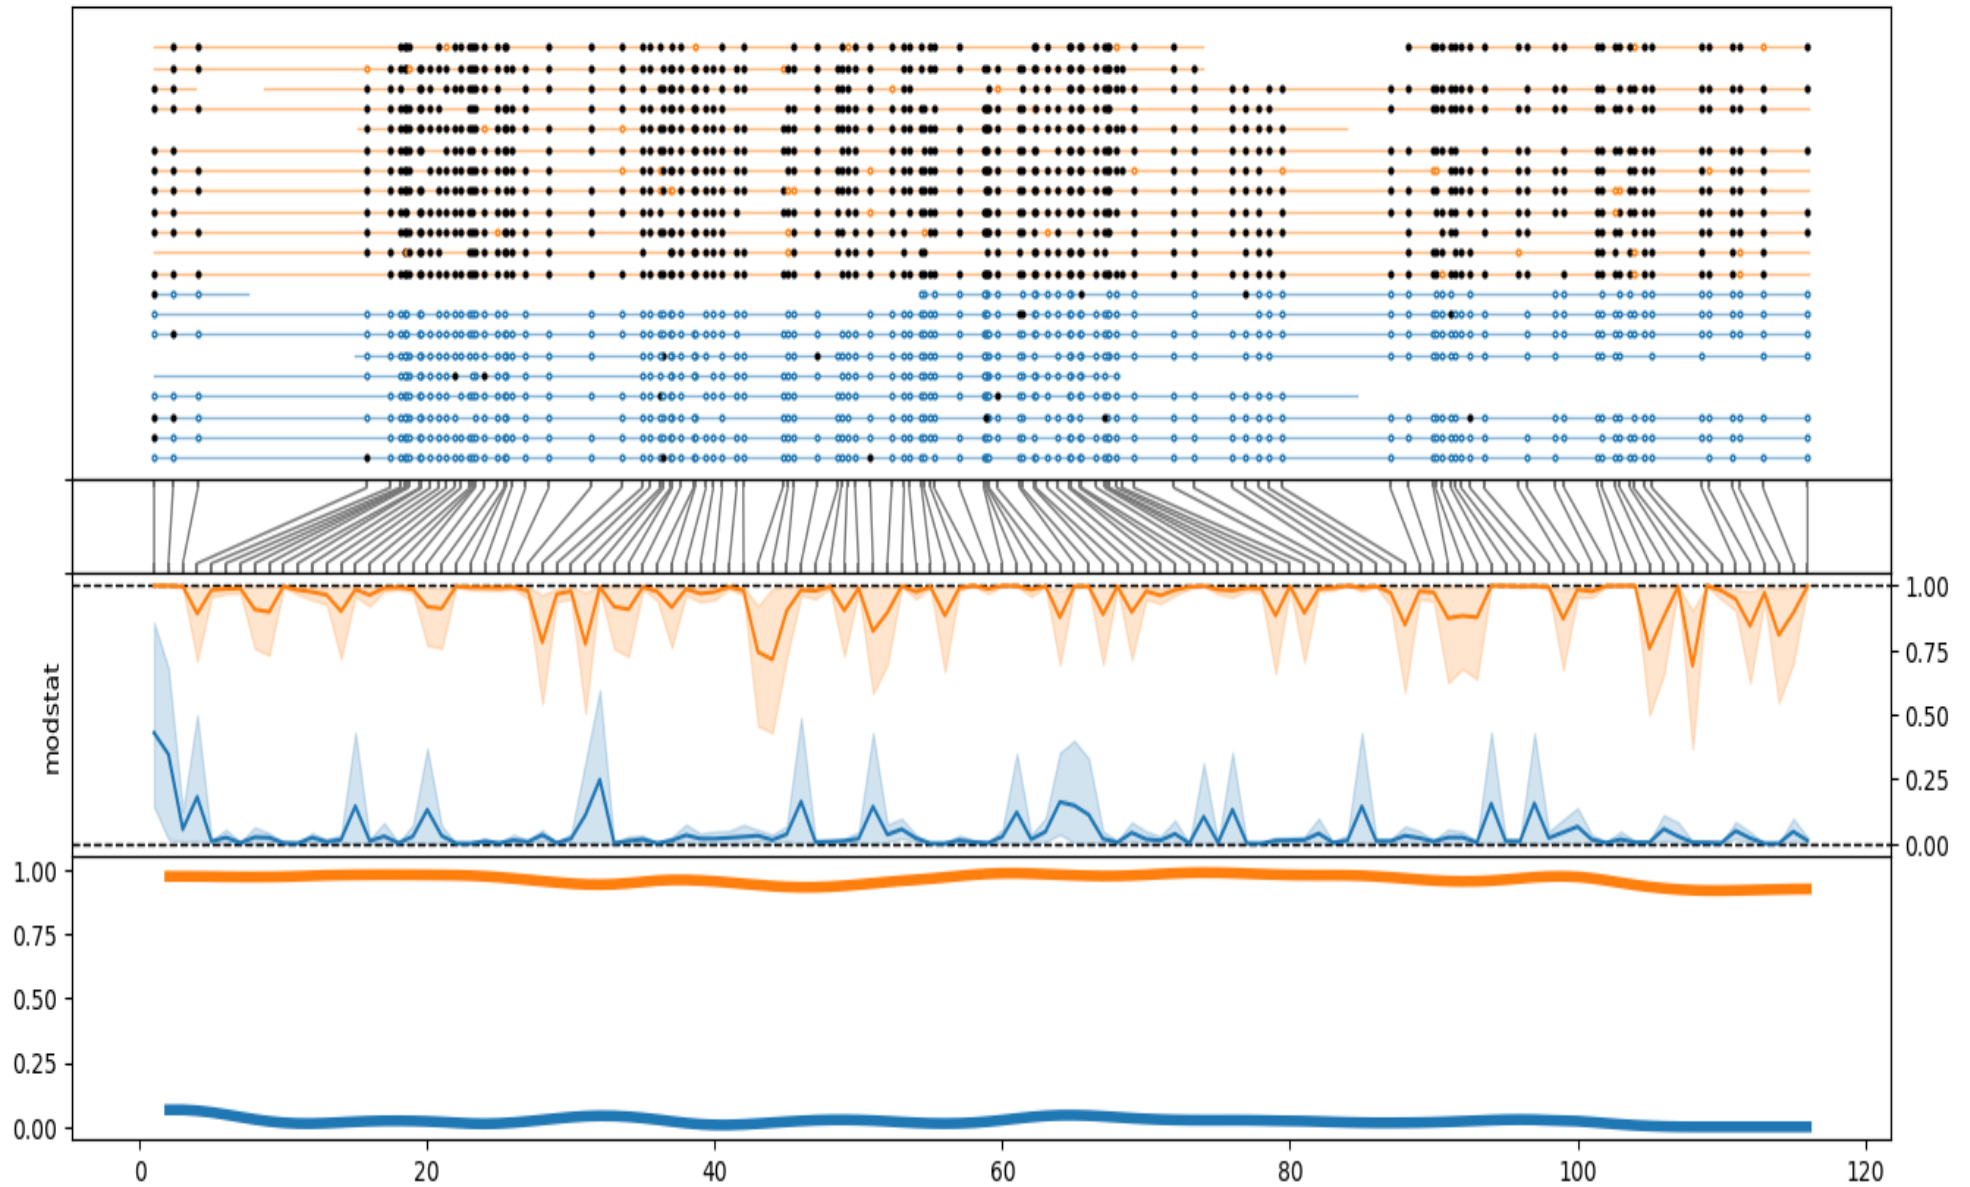

# EPI\_18\_hg38\_phased\_chr11\_1997509\_2003349

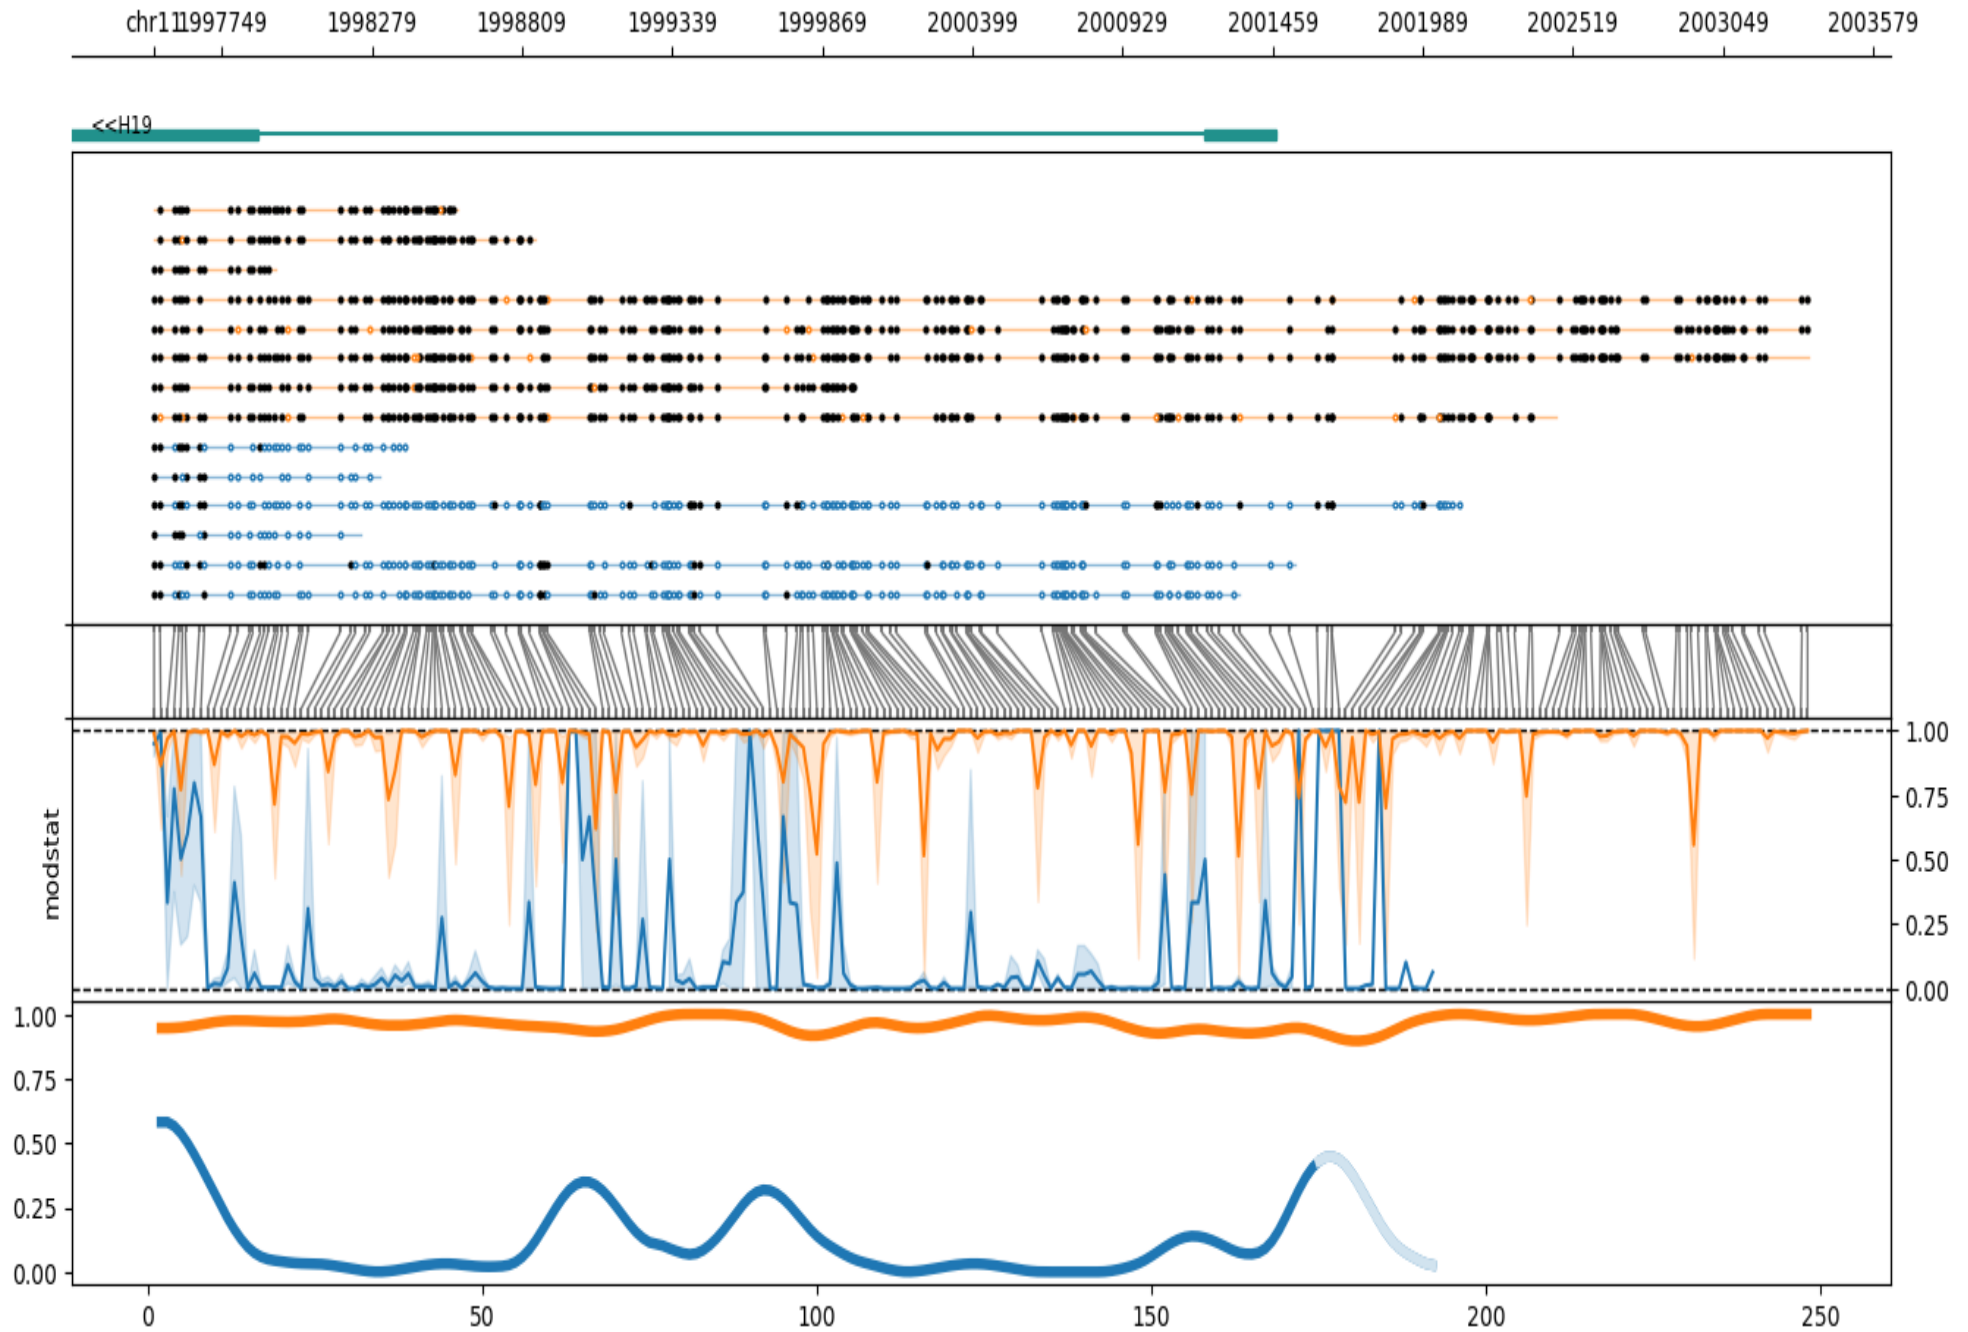



# EPI\_18\_hg38\_phased\_chr11\_2698155\_2701028

chr11 2698274 2698535 2698796 2699057 2699318 2699579 2699840 2700101 2700362 2700623 2700884 2701145

KCNQ1>>

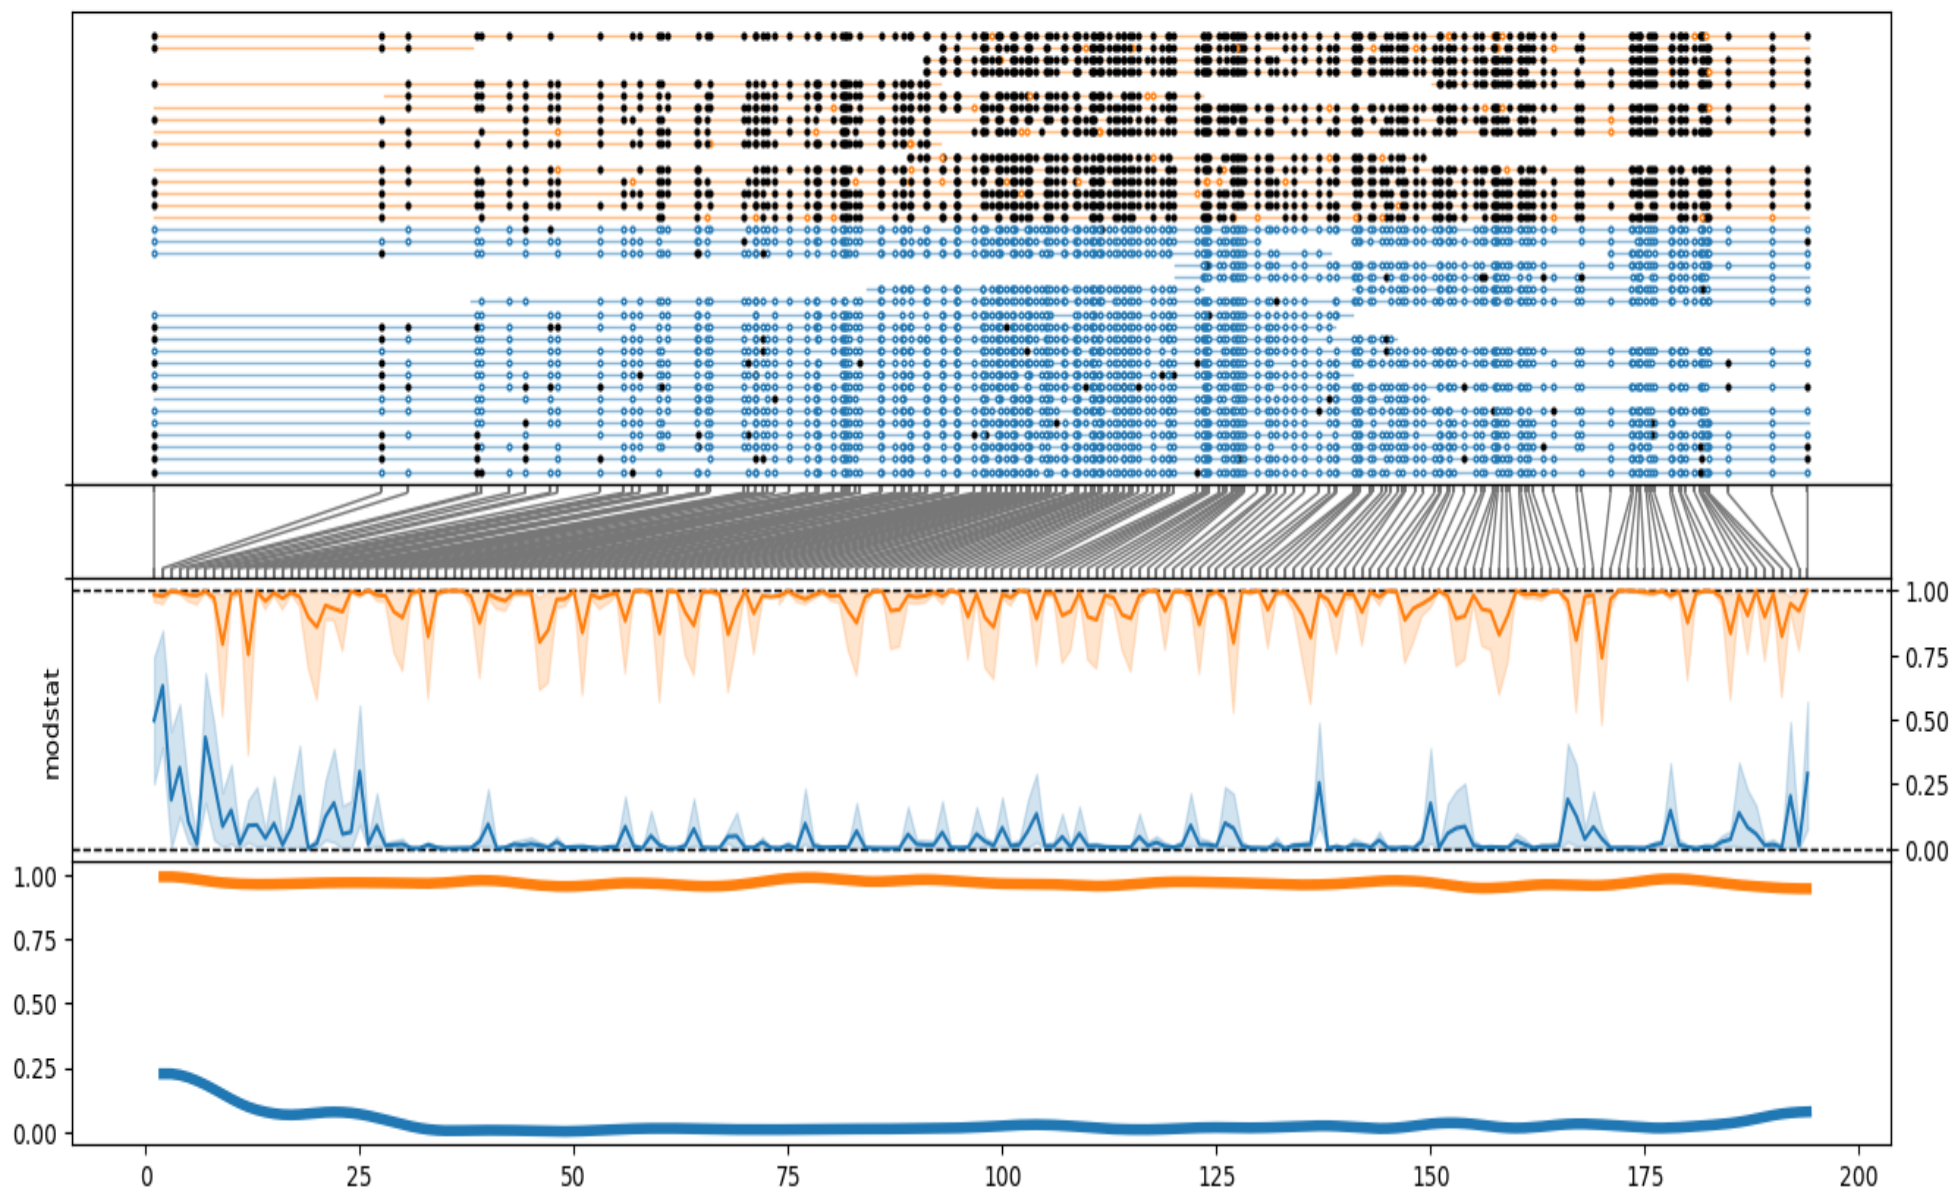

# EPI\_18\_hg38\_phased\_chr14\_100824185\_100827640

chr14 100824328 100824642 100824956 100825270 100825584 100825898 100826212 100826526 100826840 100827154 100827468 100827782

MEG3>>

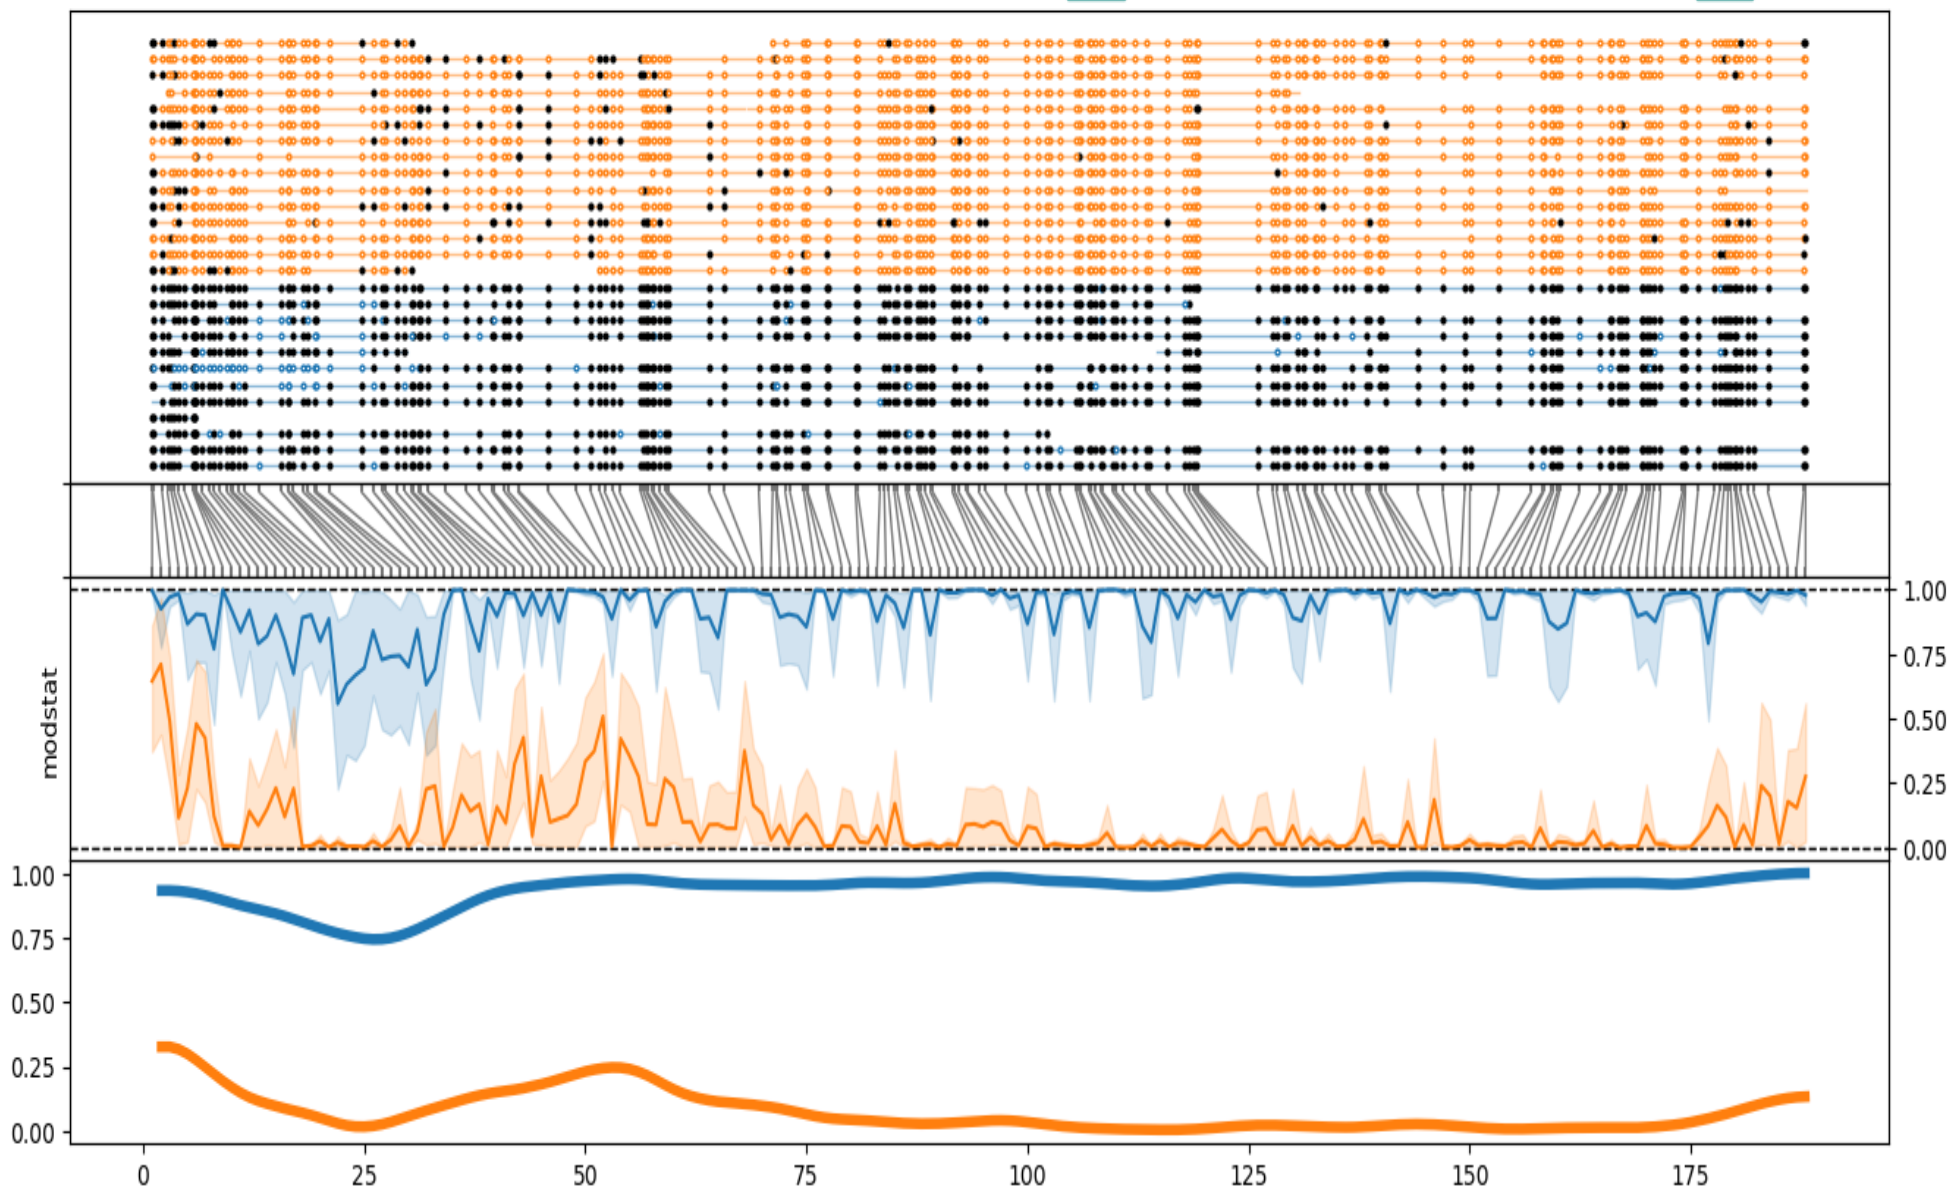

# EPI\_18\_hg38\_phased\_chr14\_100904325\_100905081

chr14 100904356 100904424 100904492 100904560 100904628 100904696 100904764 100904832 100904900 100904968 100905036 100905104

MEG8>>

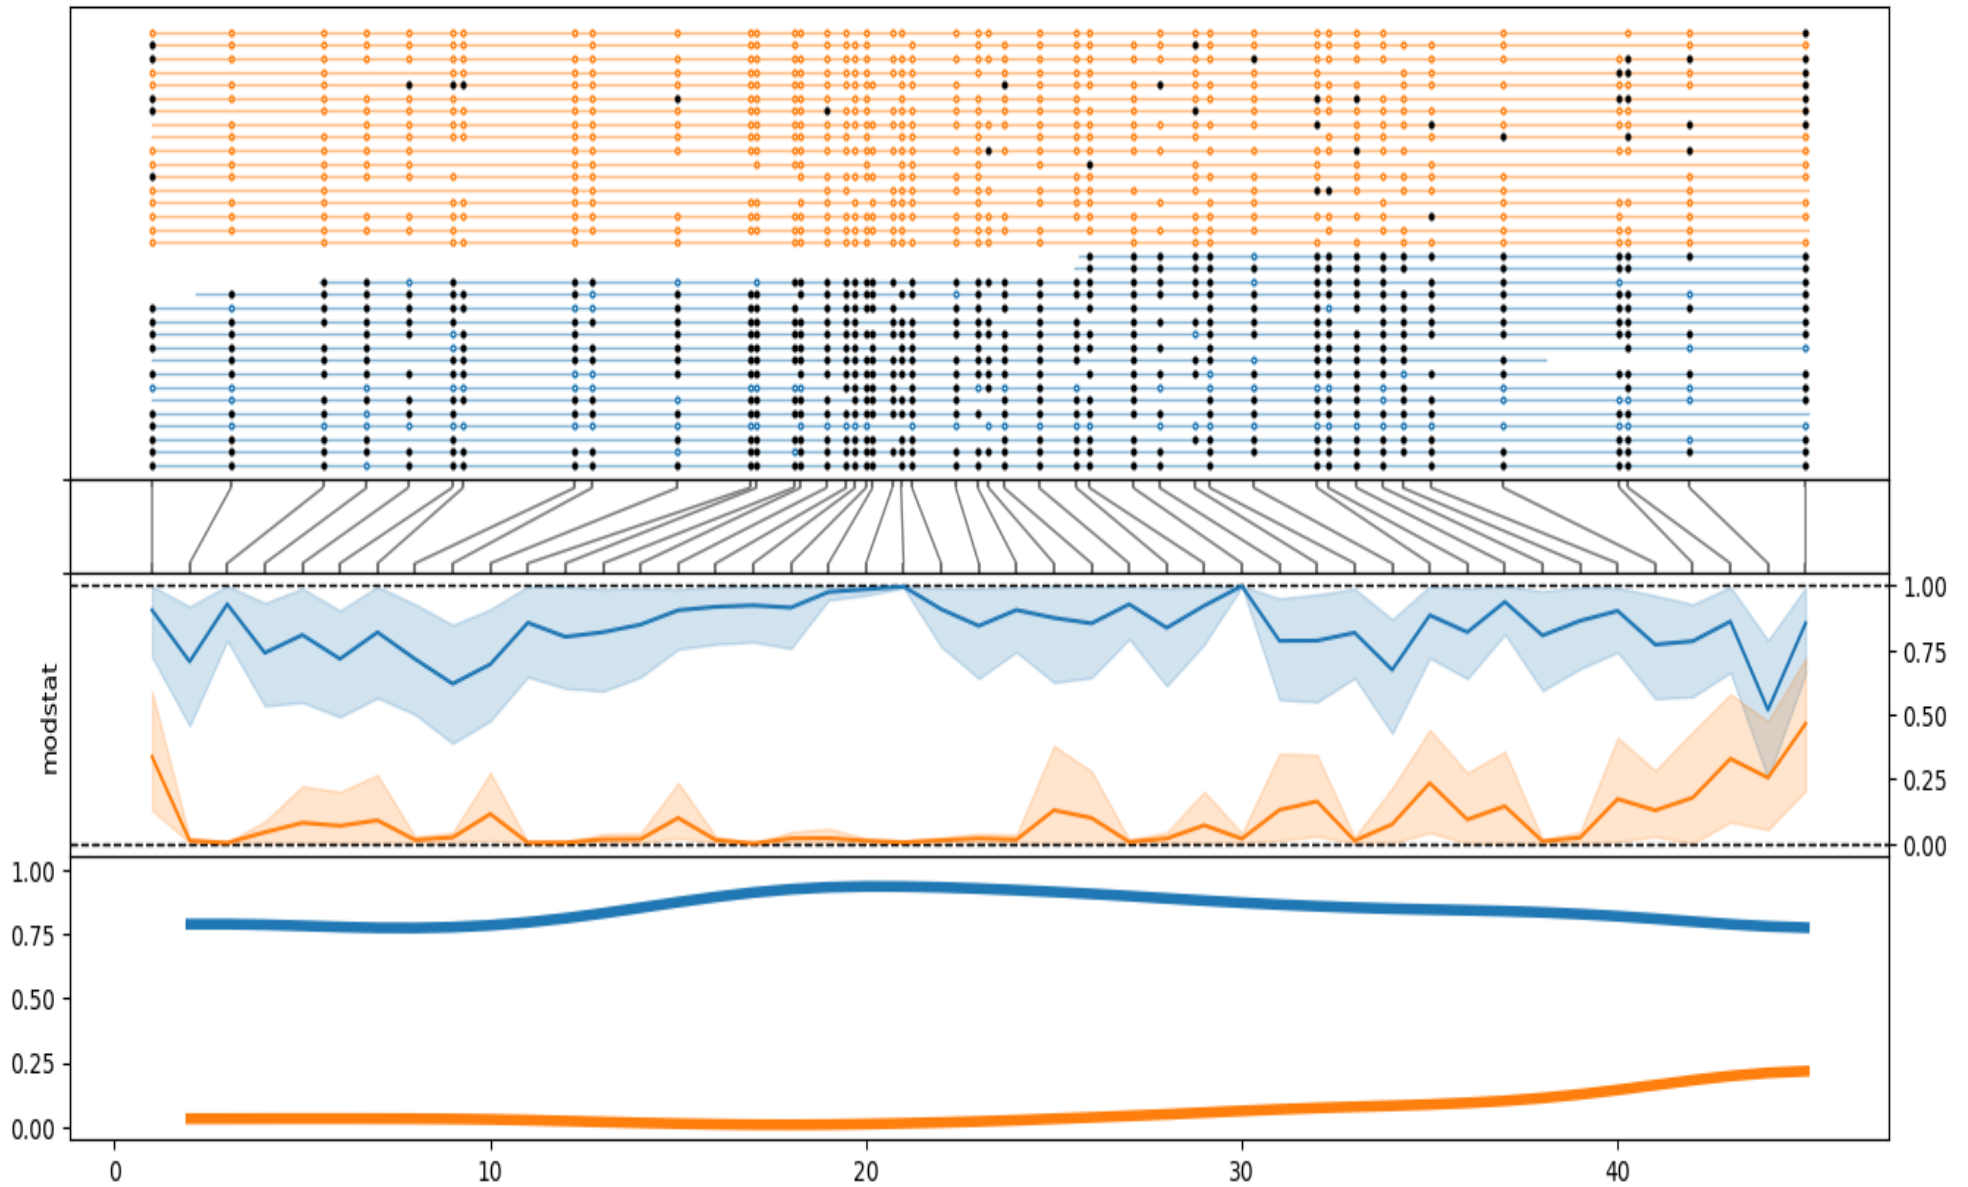

# EPI\_18\_hg38\_phased\_chr15\_23647178\_23648424

chr15:23647229 23647342 23647455 23647568 23647681 23647794 23647907 23648020 23648133 23648246 23648359 23648472

<<MAGEL2

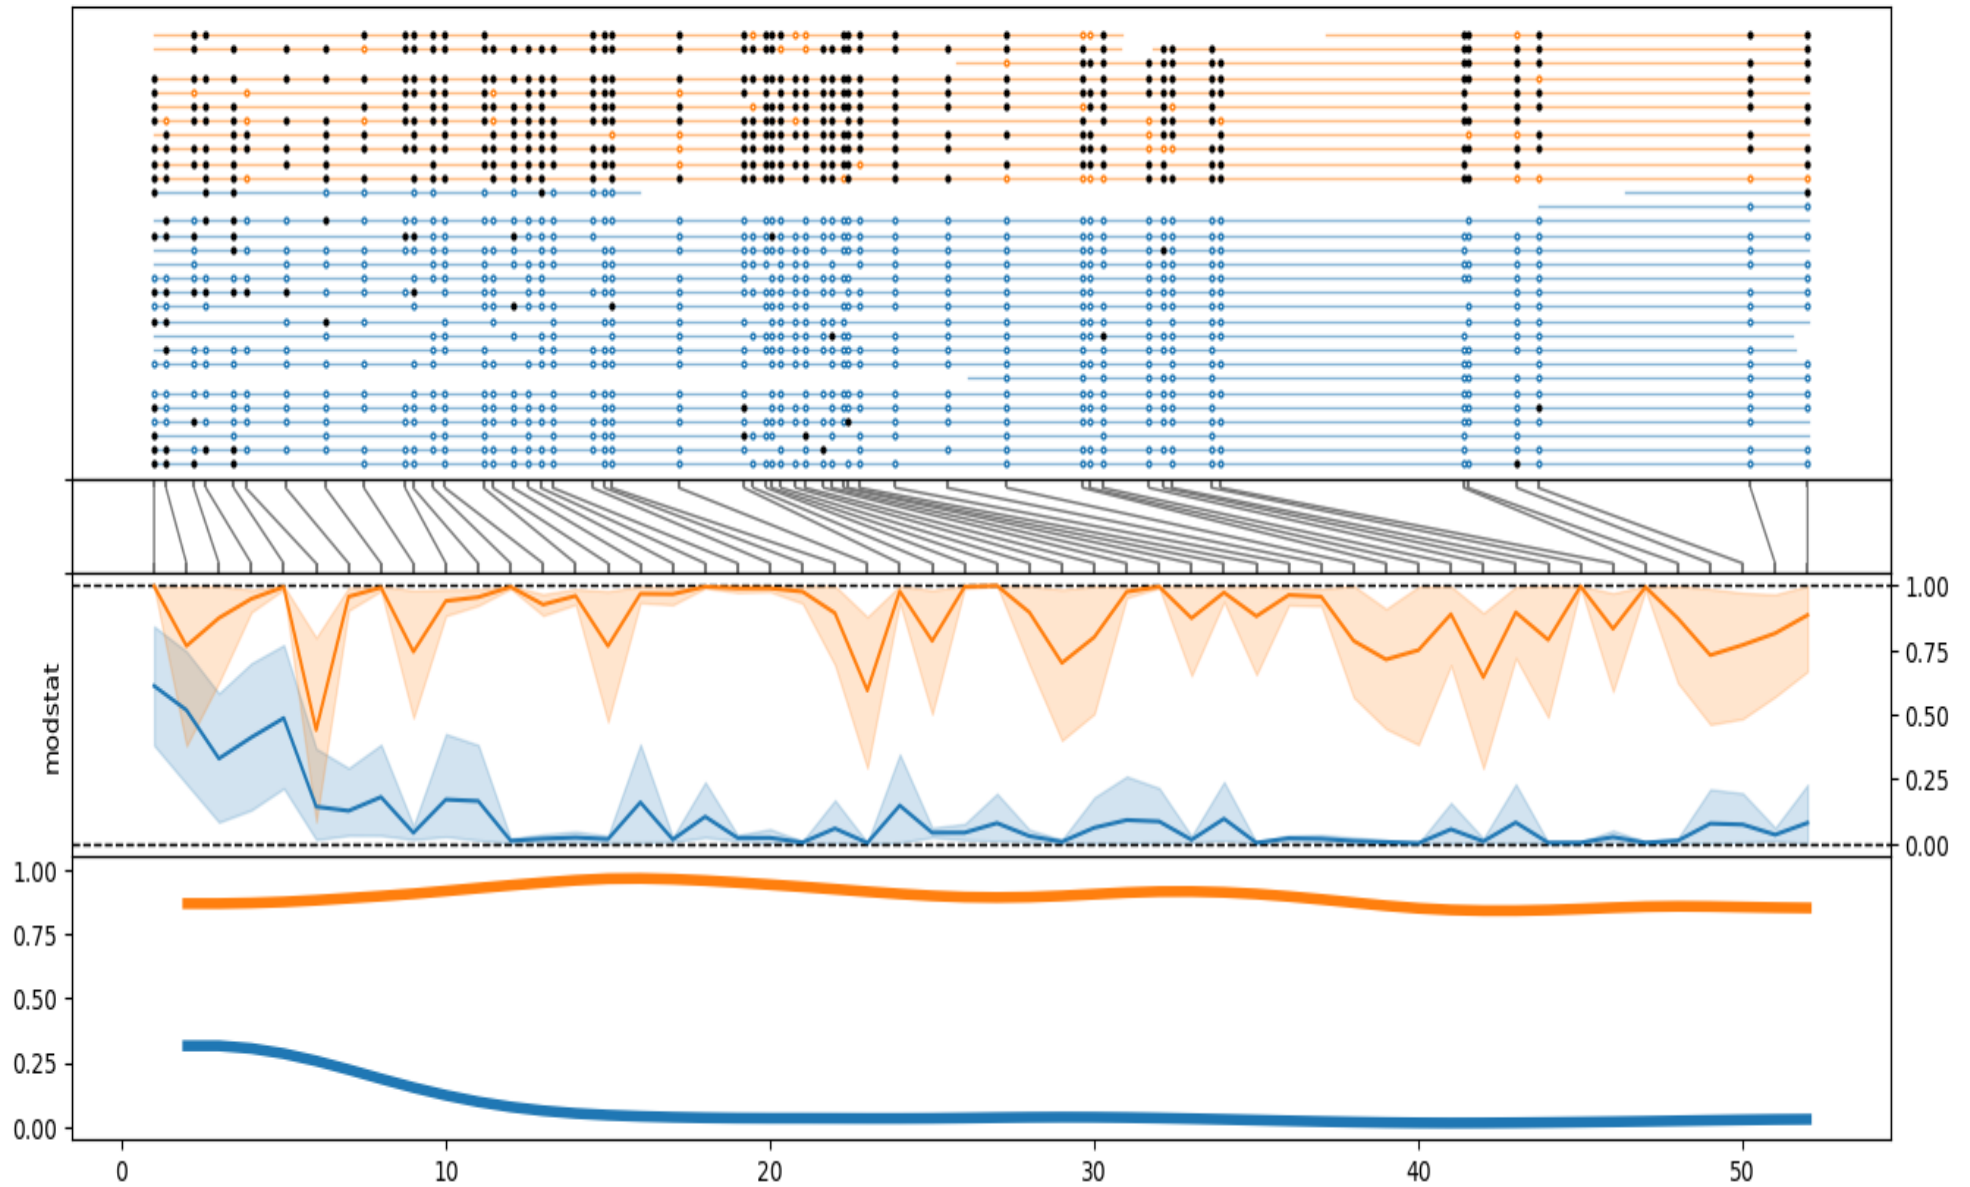



# EPI\_18\_hg38\_phased\_chr15\_24954564\_24956828

chr15:24954657 24954862 24955067 24955272 24955477 24955682 24955887 24956092 24956297 24956502 24956707 24956912

SNRPN>>

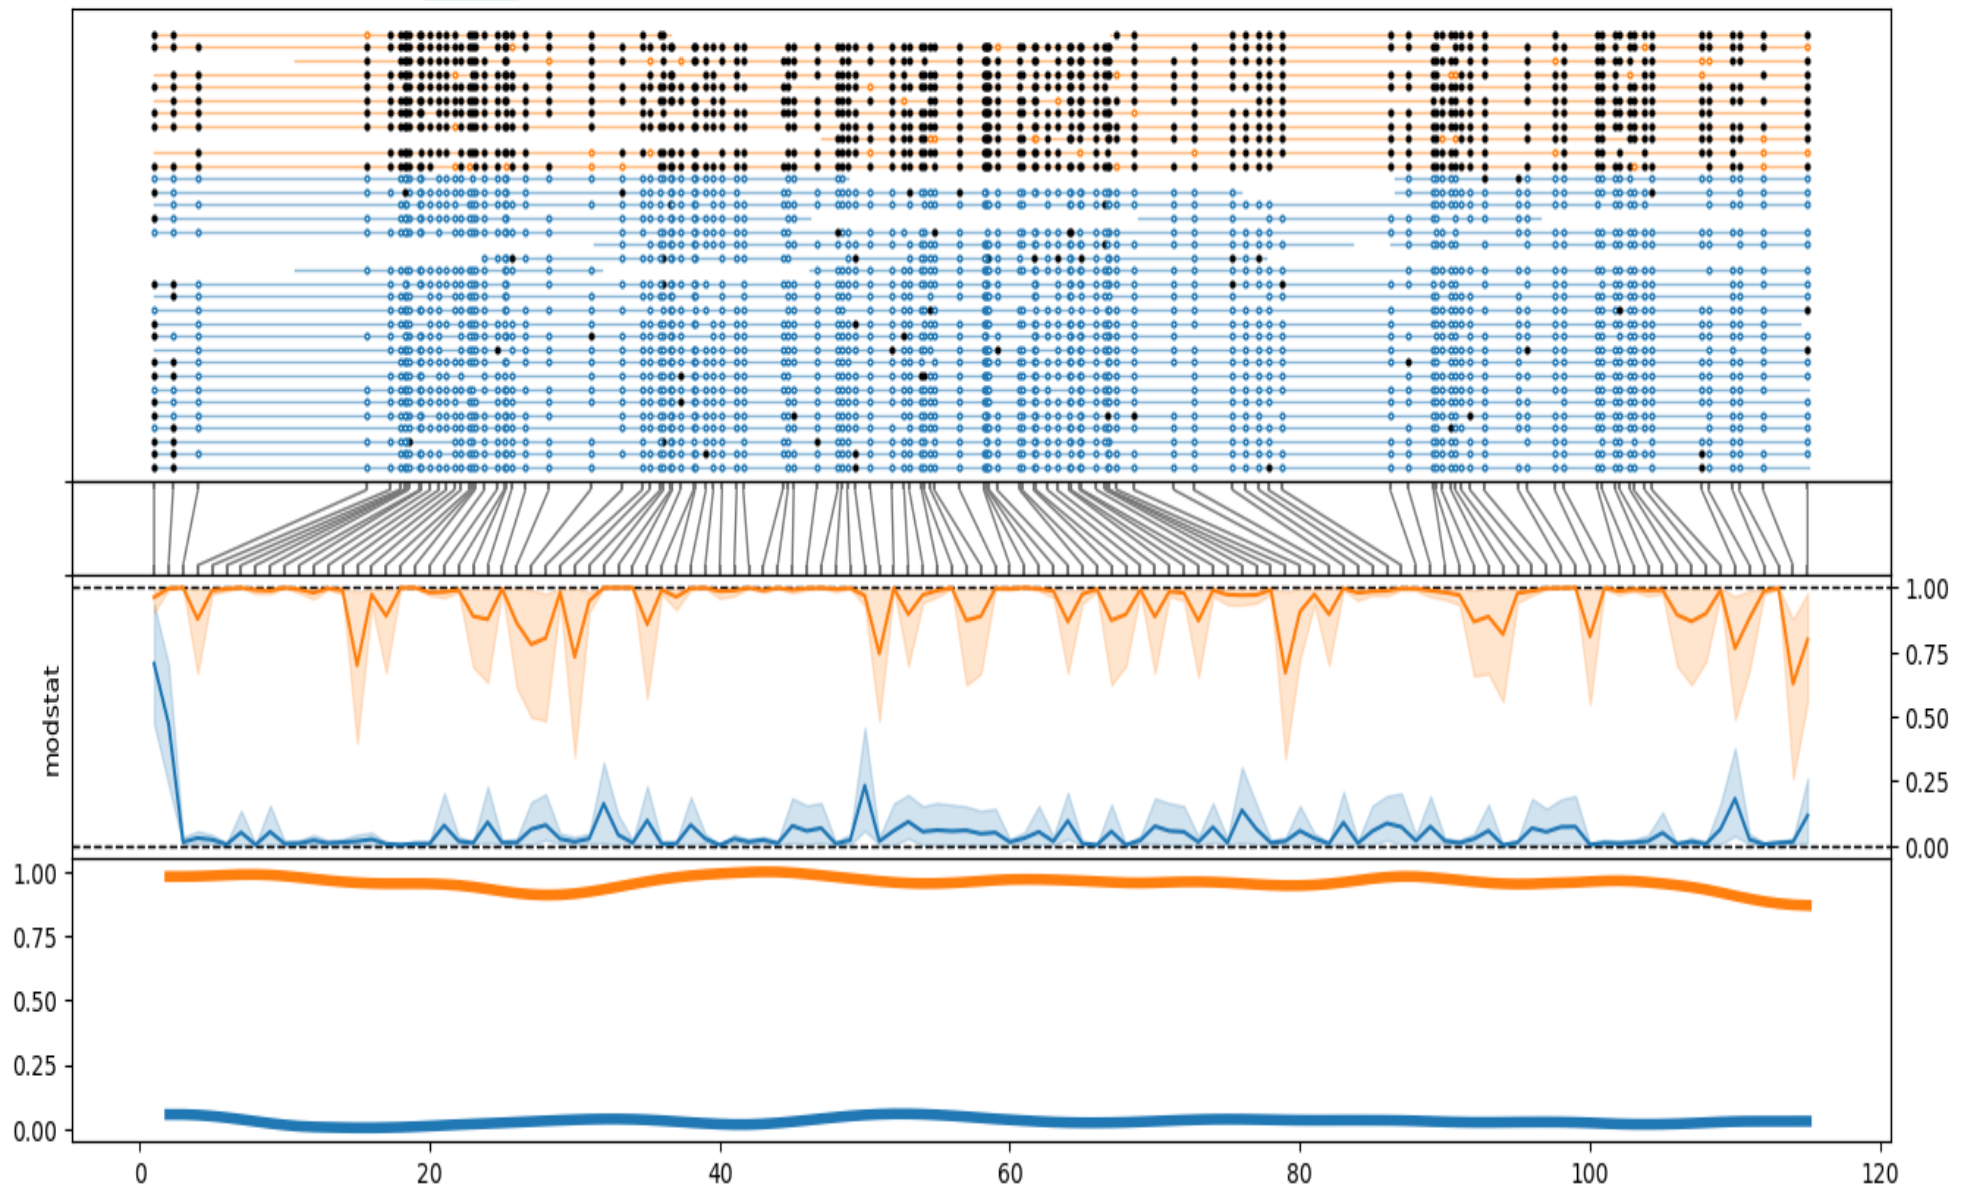

# EPI\_19\_hg38\_phased\_chr11\_2698155\_2701028

chr11 2698274 2698535 2698796 2699057 2699318 2699579 2699840 2700101 2700362 2700623 2700884 2701145

KCNQ1>>

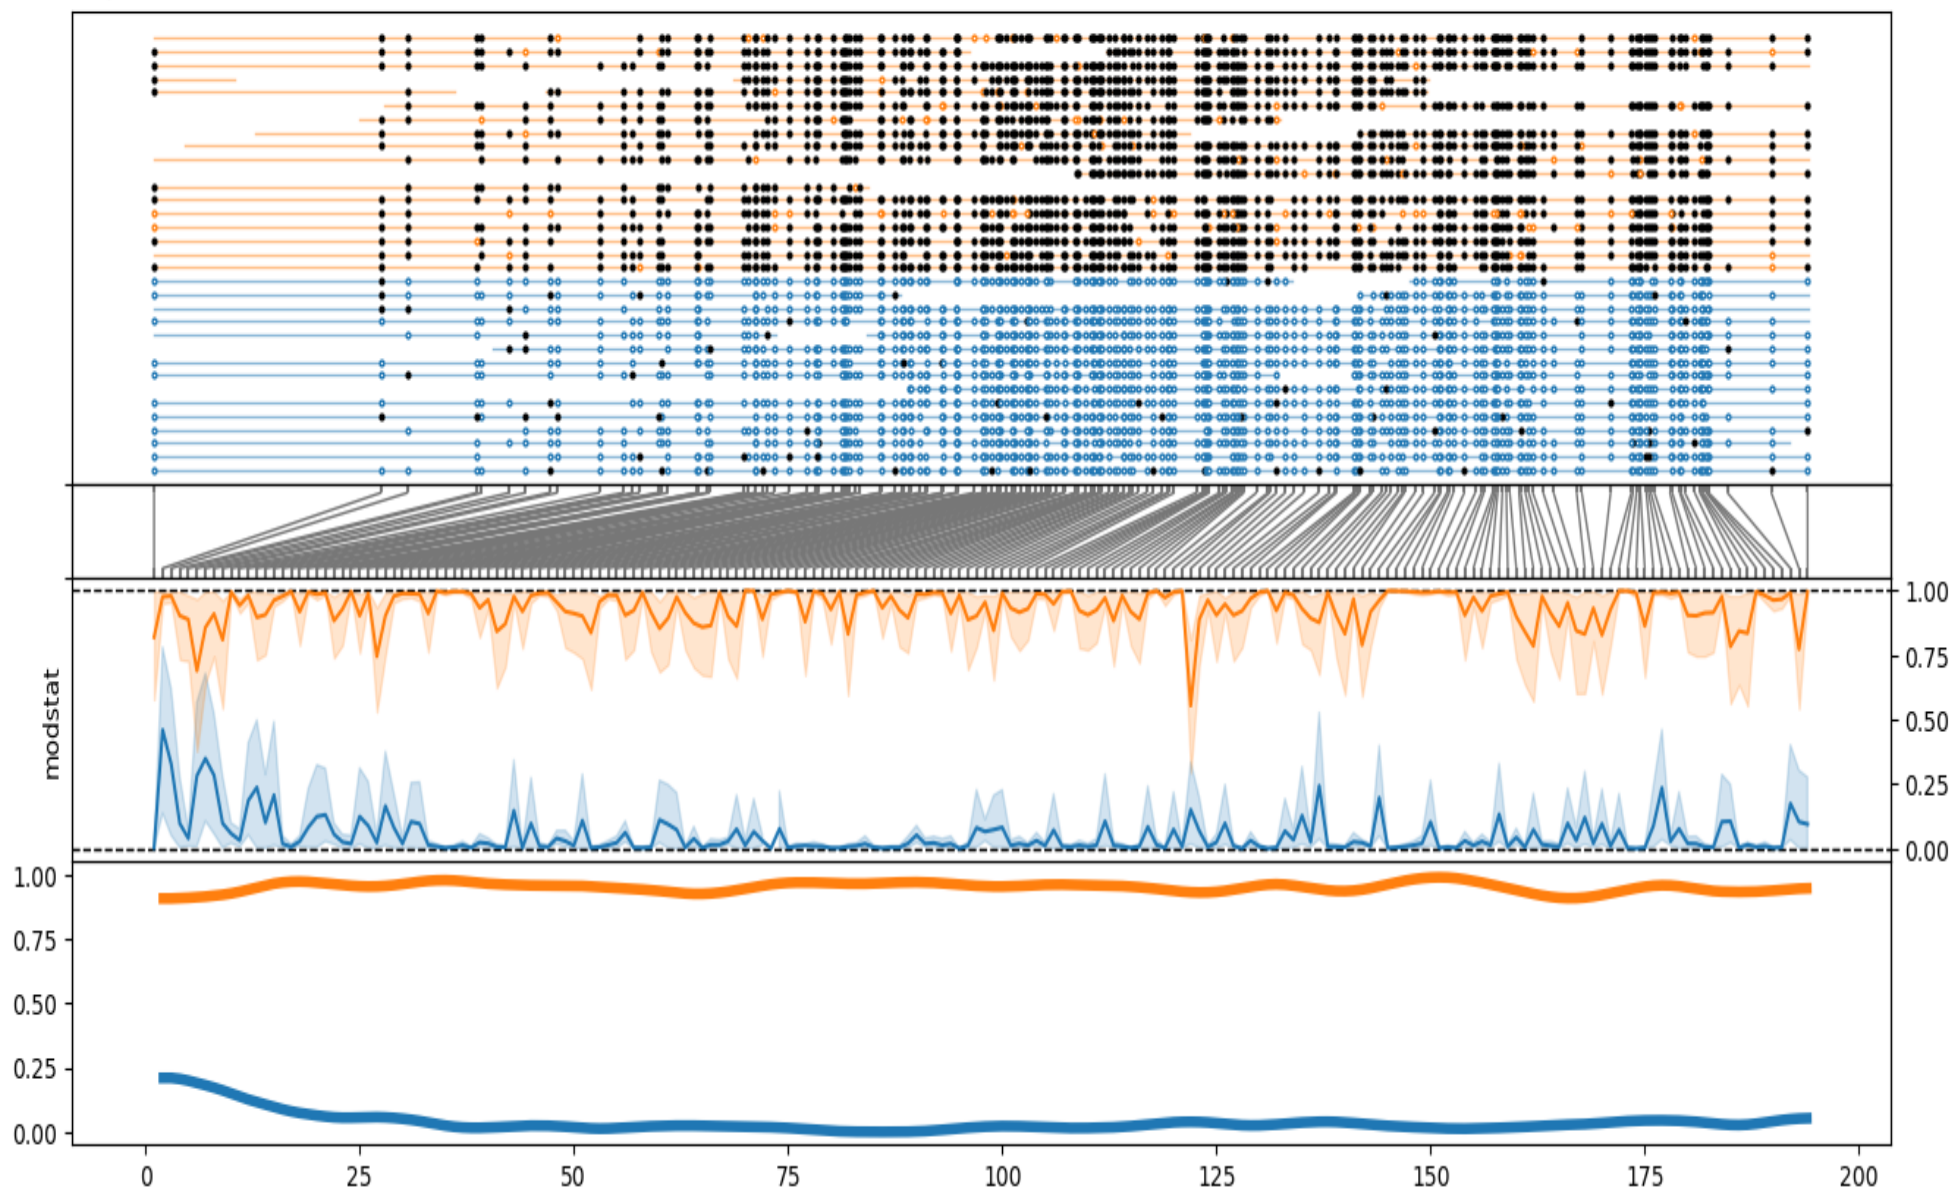

# EPI\_19\_hg38\_phased\_chr14\_100824185\_100827640

chr14 100824328 100824642 100824956 100825270 100825584 100825898 100826212 100826526 100826840 100827154 100827468 100827782

MEG3>>

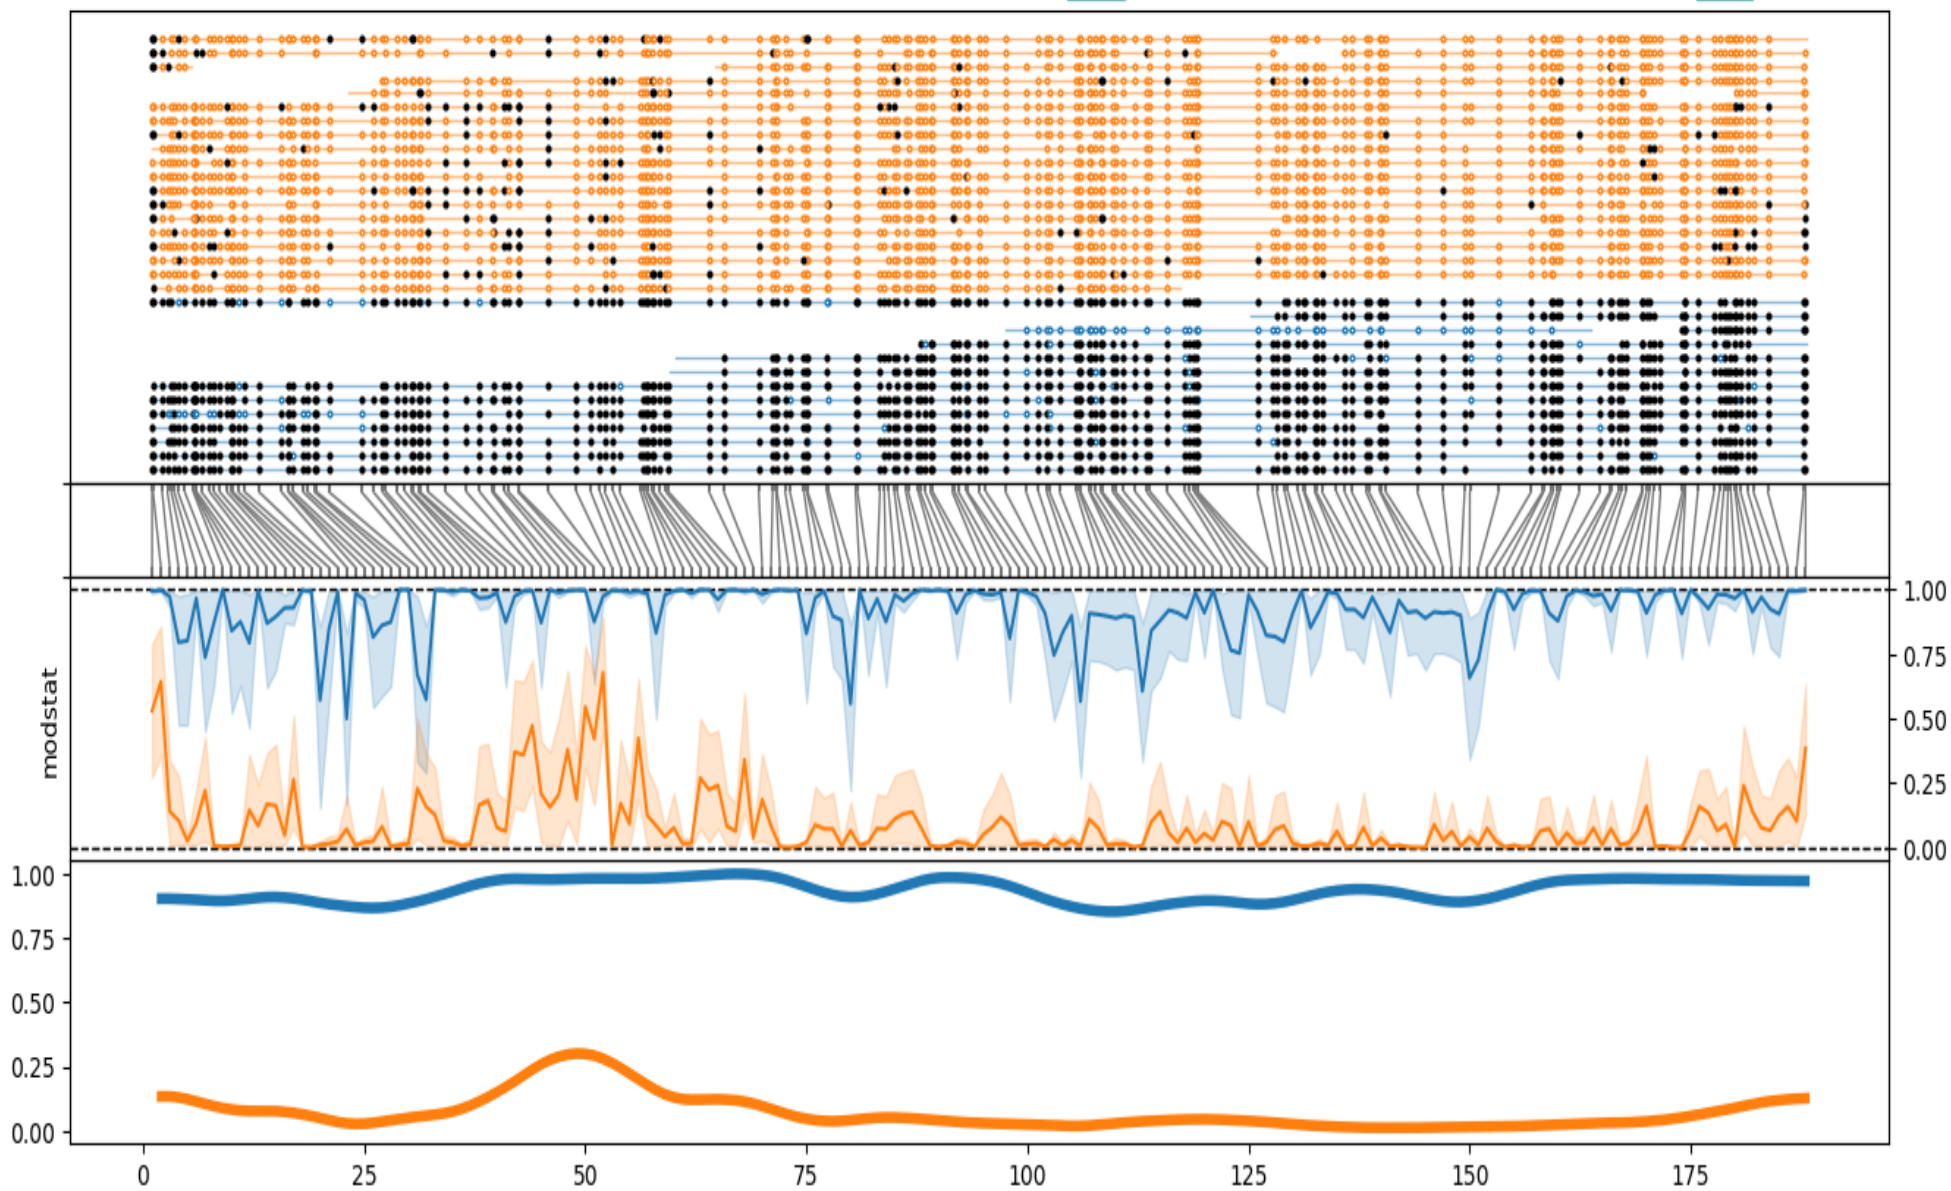



# EPI\_19\_hg38\_phased\_chr14\_100904325\_100905081

chr14 100904356 100904424 100904492 100904560 100904628 100904696 100904764 100904832 100904900 100904968 100905036 100905104

MEG8>>

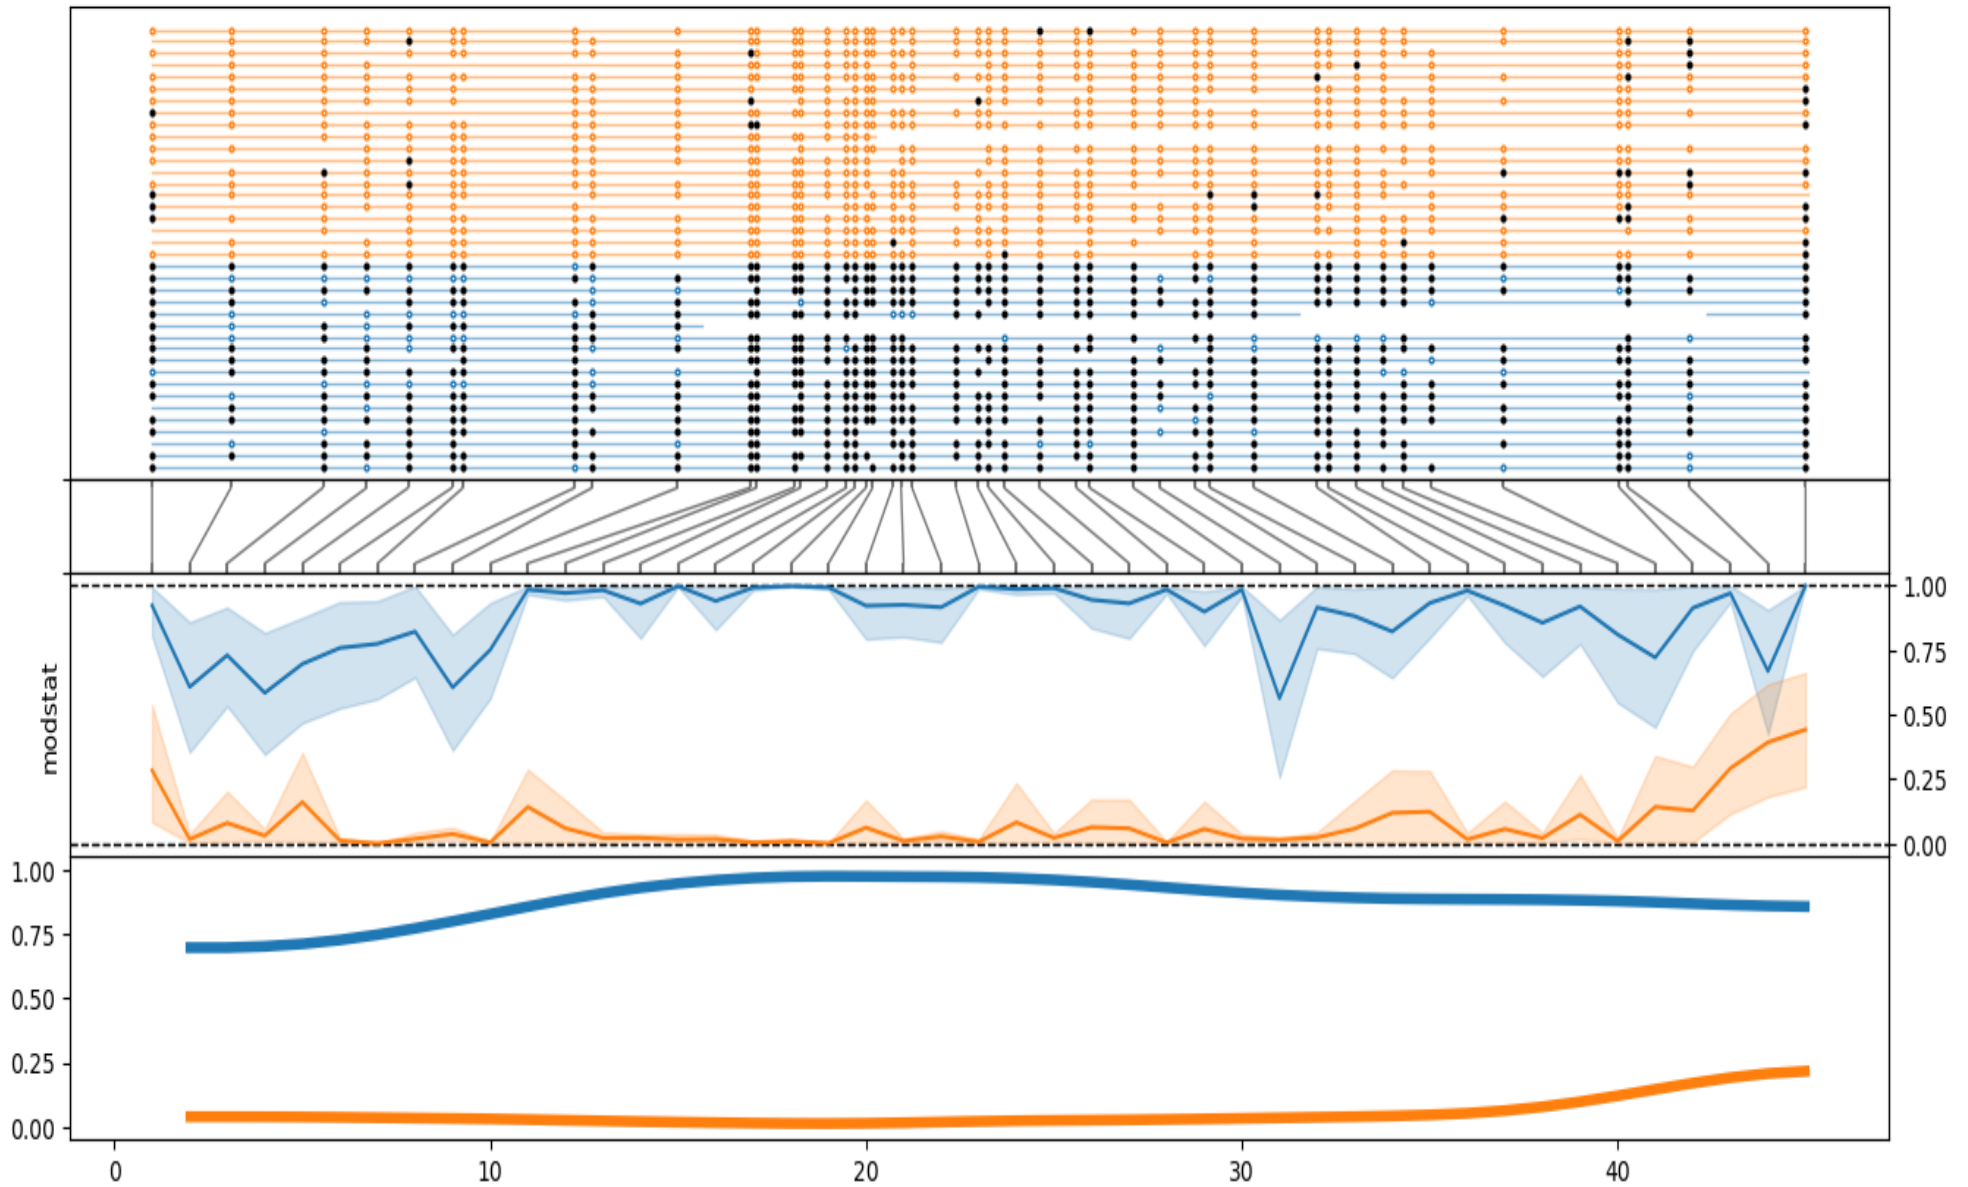



# EPI\_19\_hg38\_phased\_chr15\_23647178\_23648424

chr15:23647229 23647342 23647455 23647568 23647681 23647794 23647907 23648020 23648133 23648246 23648359 23648472

<<MAGEL2

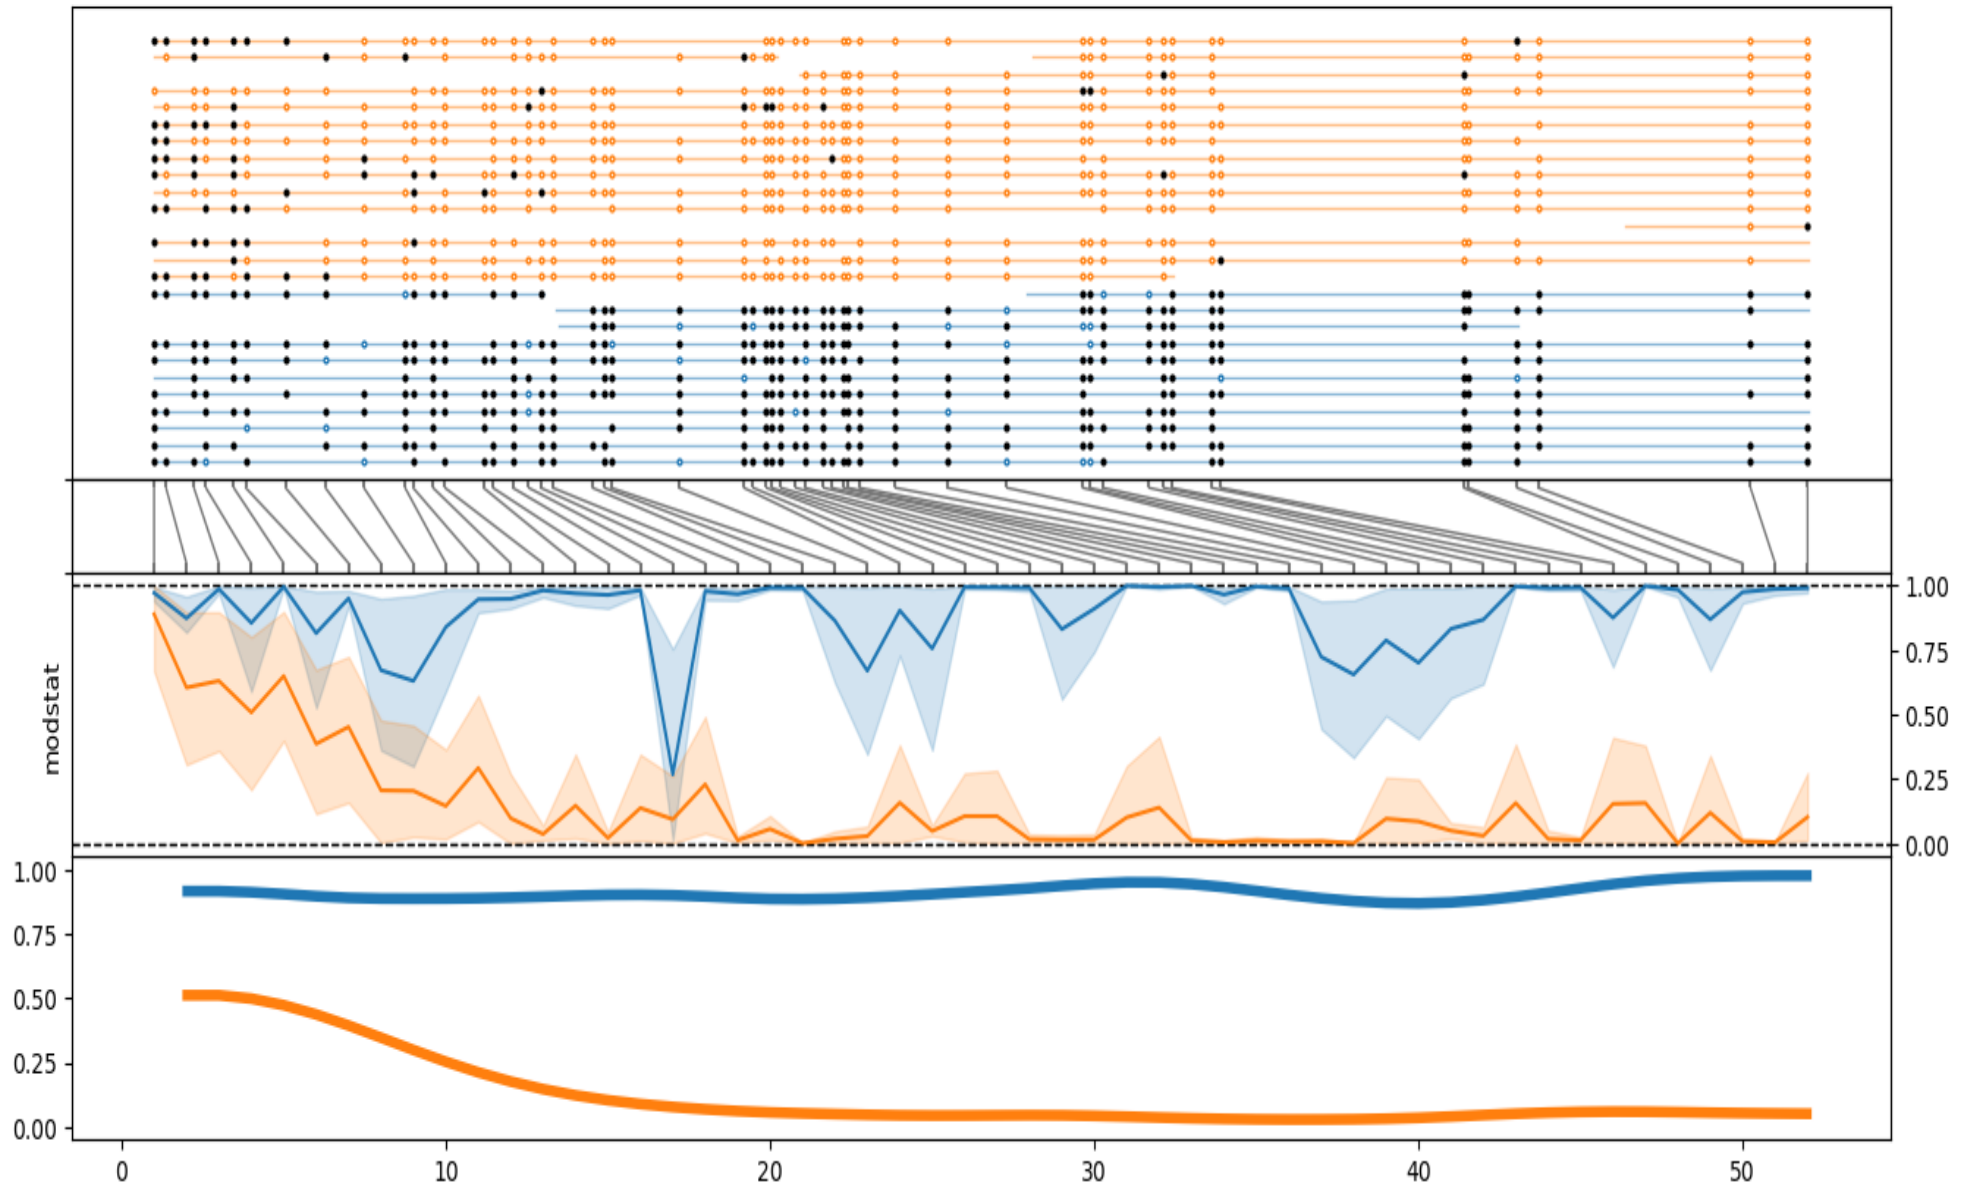

# EPI\_19\_hg38\_phased\_chr15\_24954564\_24956828

chr15:24954657 24954862 24955067 24955272 24955477 24955682 24955887 24956092 24956297 24956502 24956707 24956912

SNRPN>>

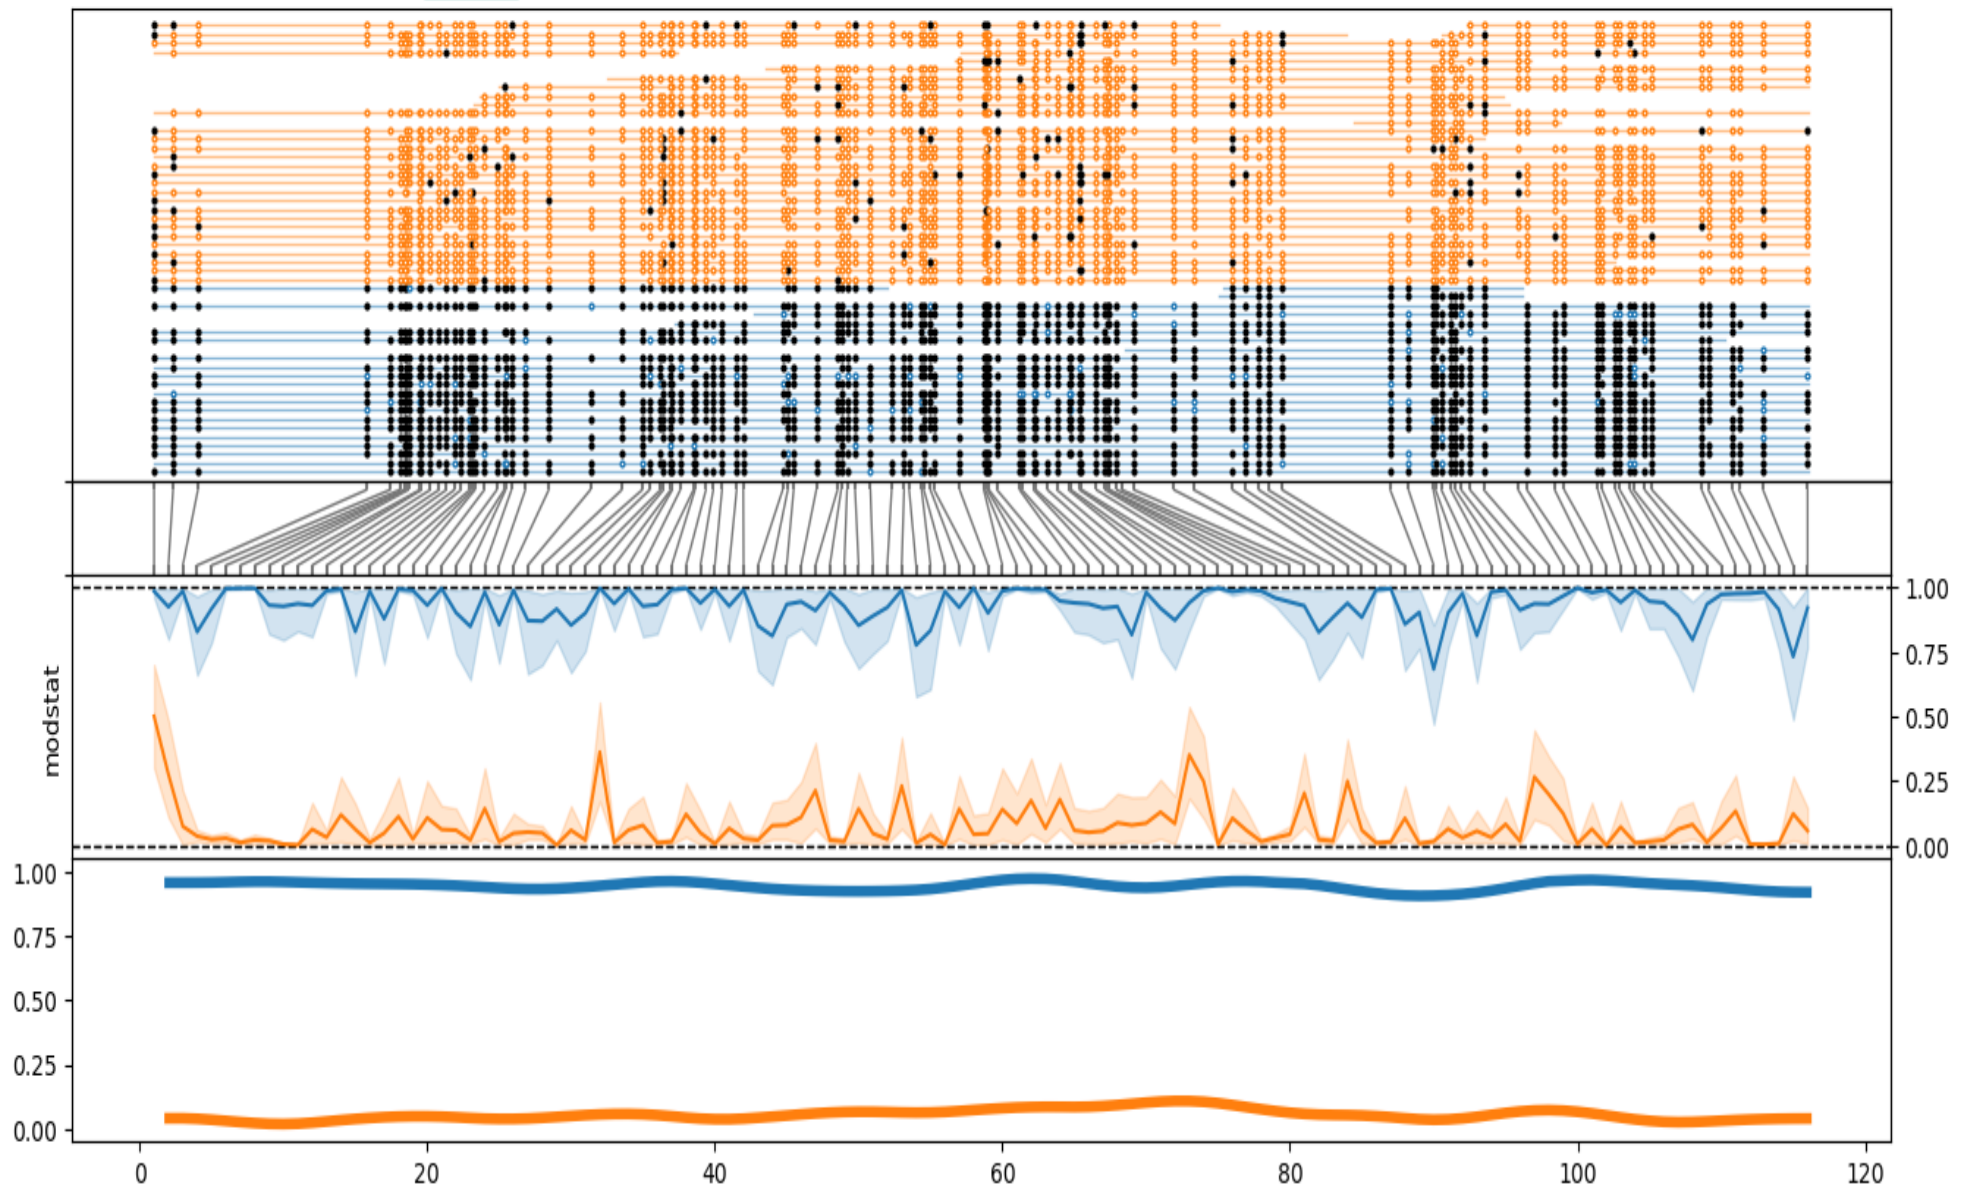

# EPI\_20\_hg38\_phased\_chr11\_1997509\_2003349

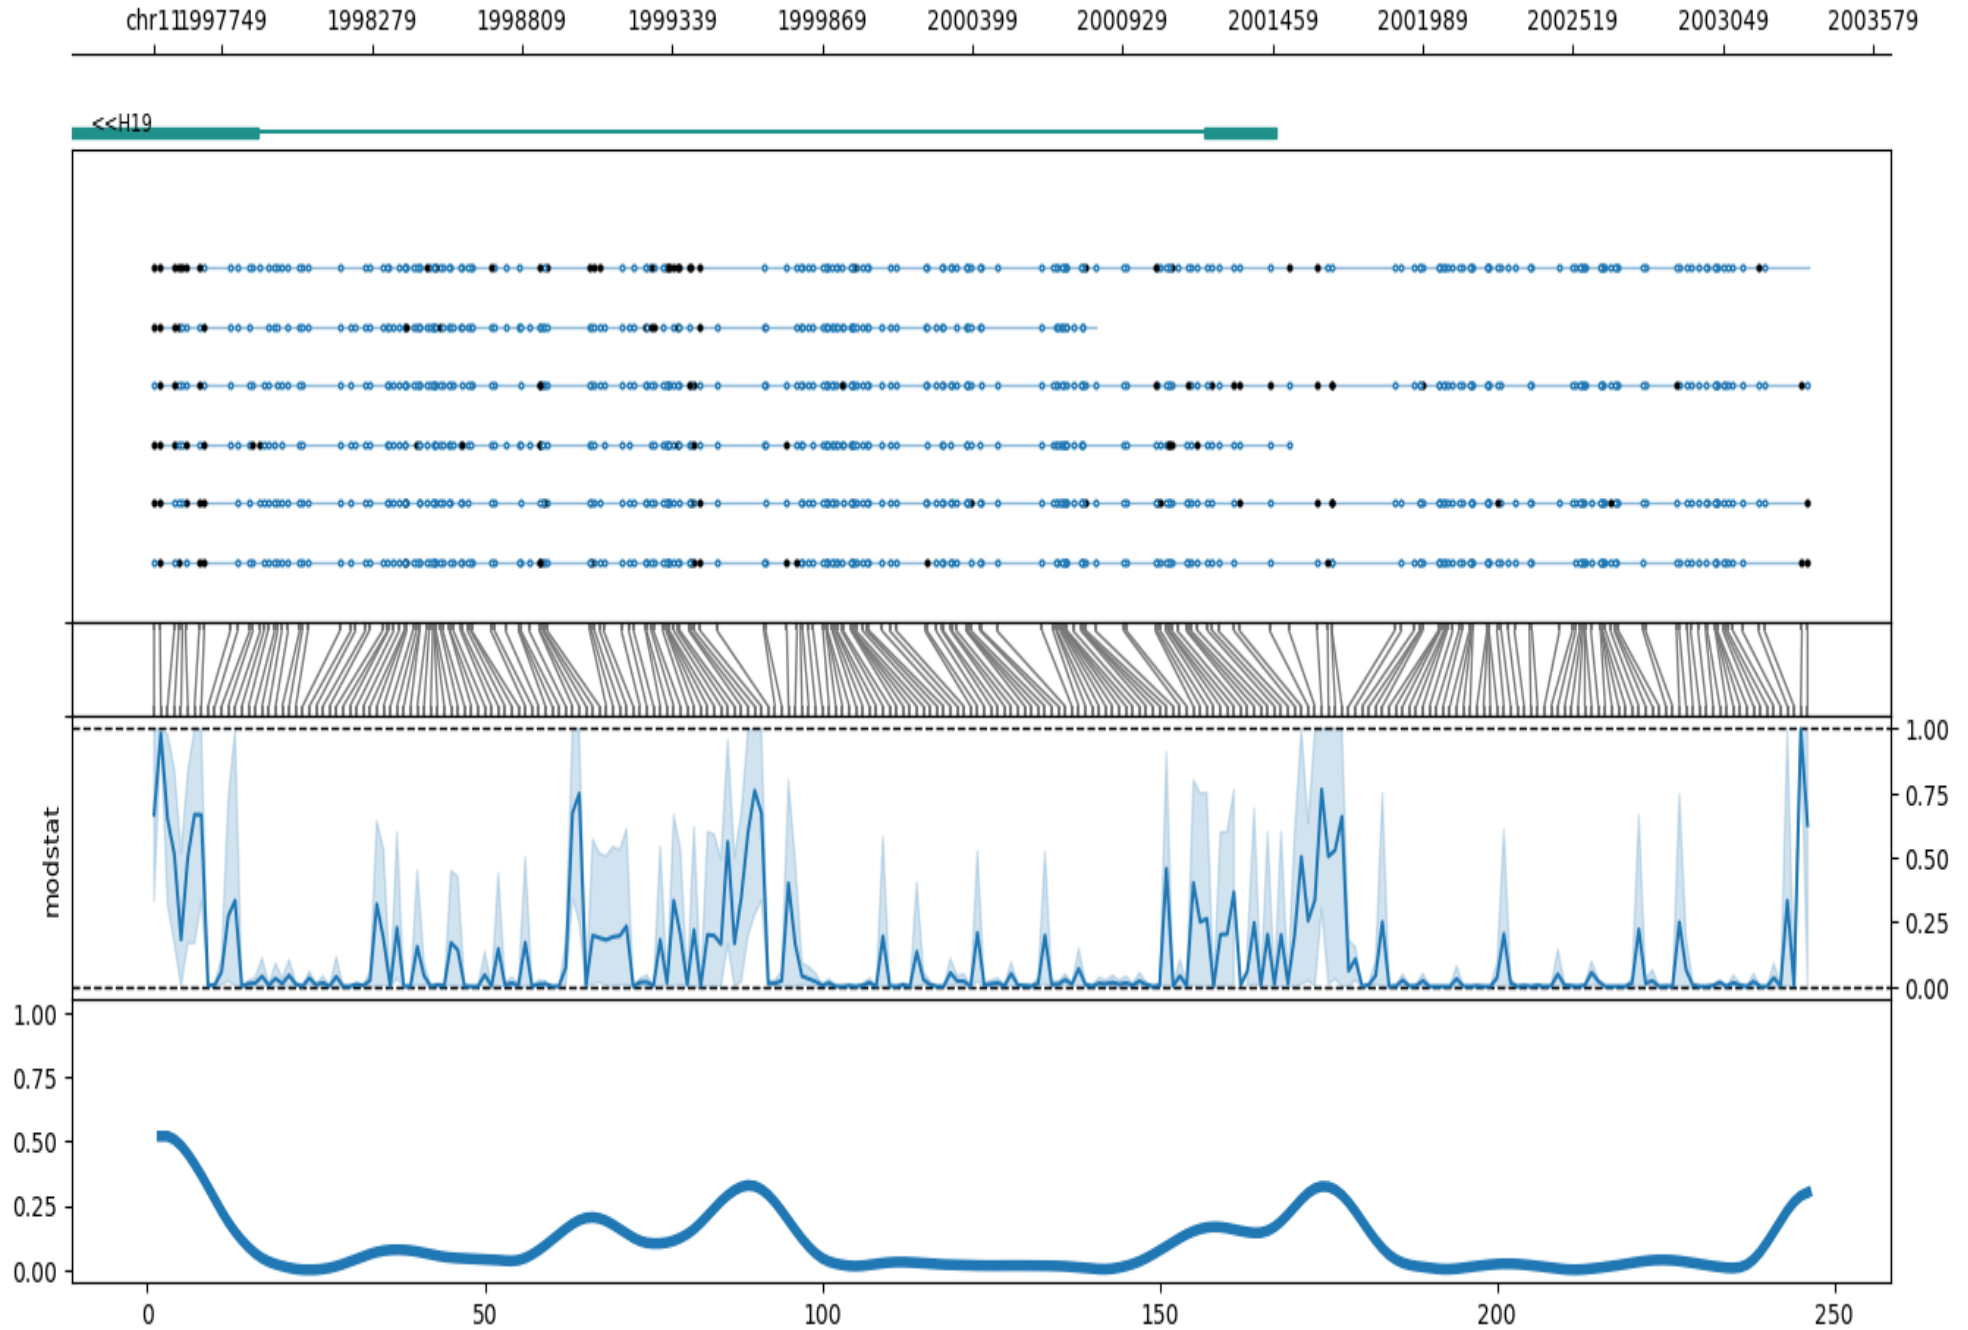

# EPI\_20\_hg38\_phased\_chr11\_2698155\_2701028

chr11 2698274 2698535 2698796 2699057 2699318 2699579 2699840 2700101 2700362 2700623 2700884 2701145

KCNQ1>>

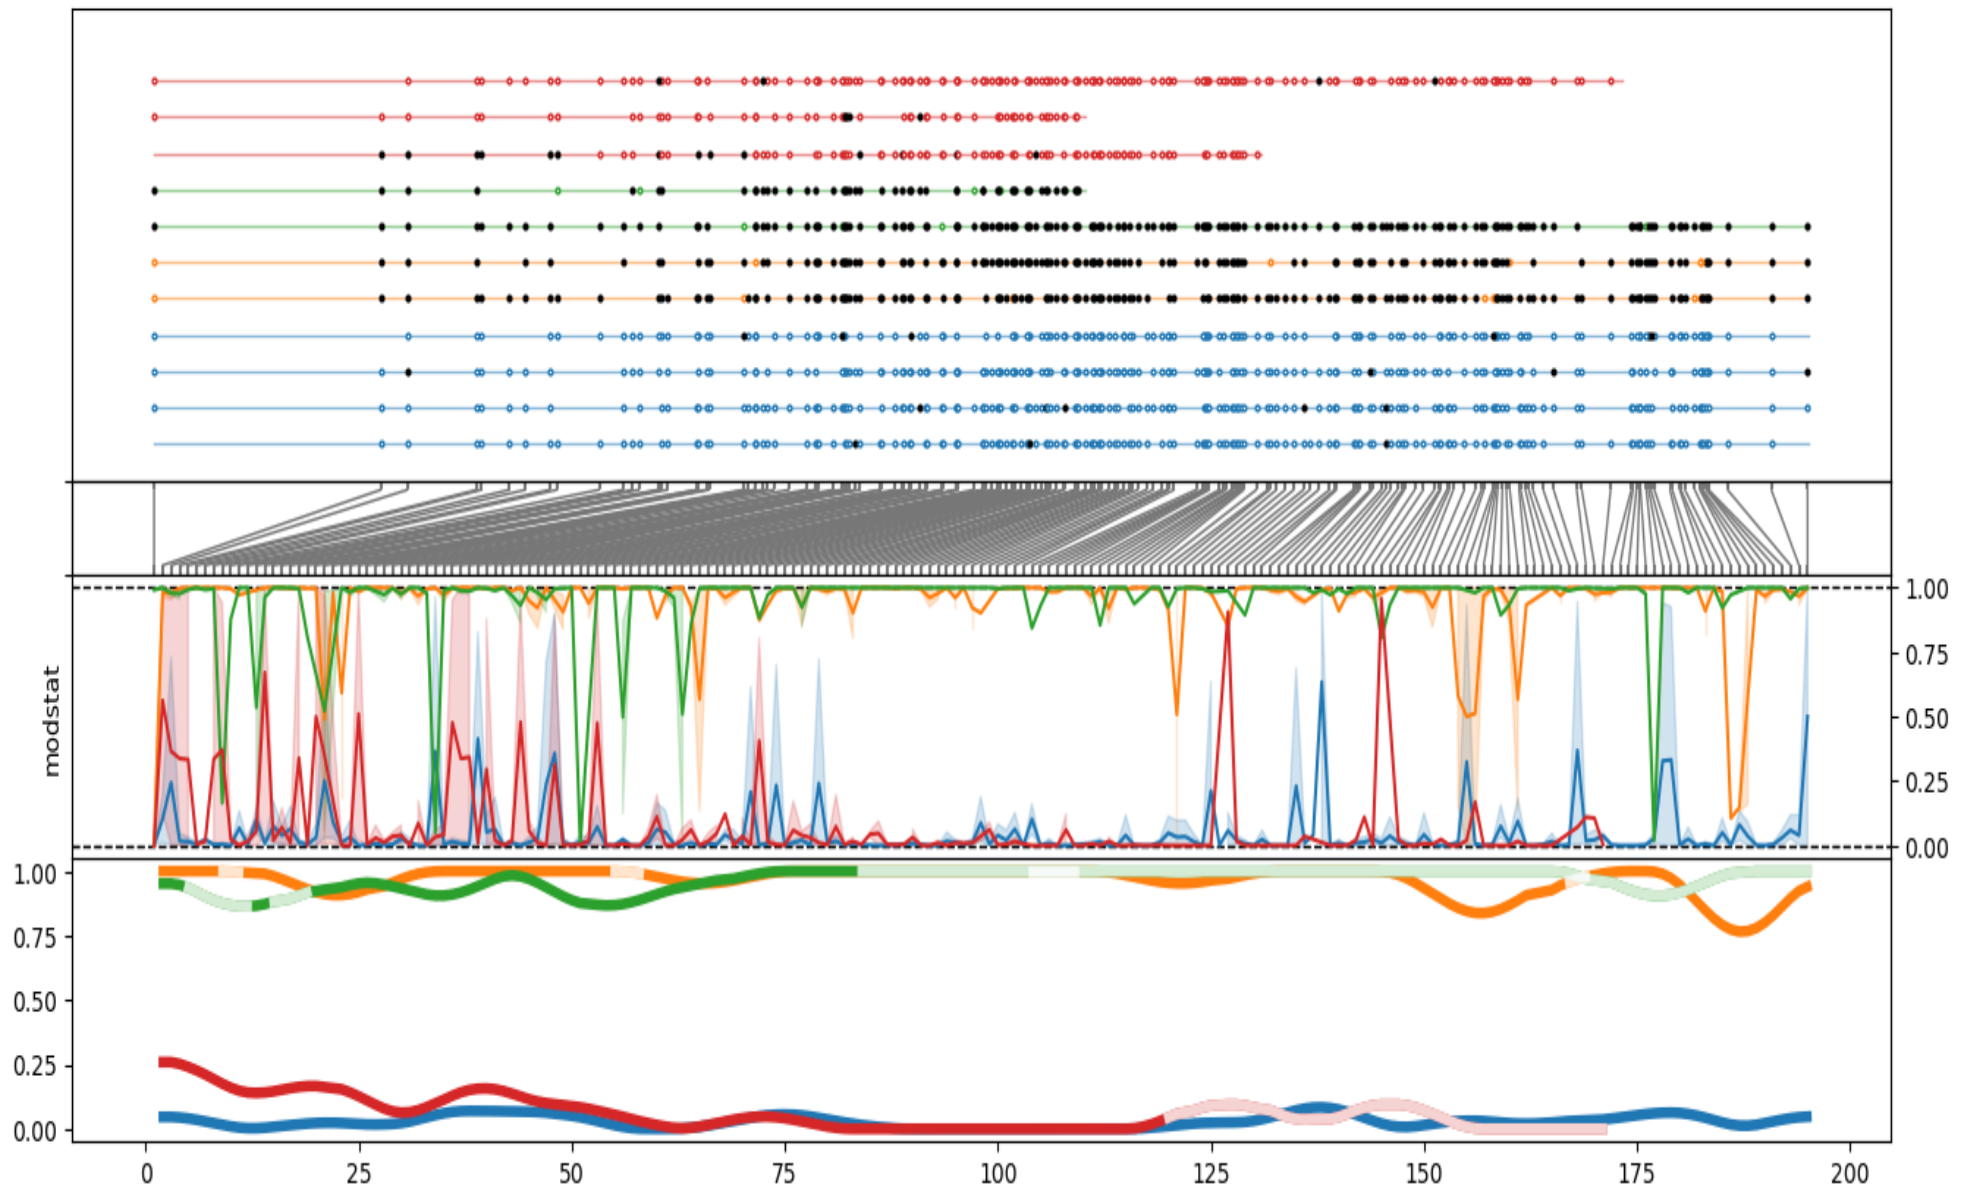



# EPI\_20\_hg38\_phased\_chr14\_100824185\_100827640

chr14 100824328 100824642 100824956 100825270 100825584 100825898 100826212 100826526 100826840 100827154 100827468 100827782

MEG3>>

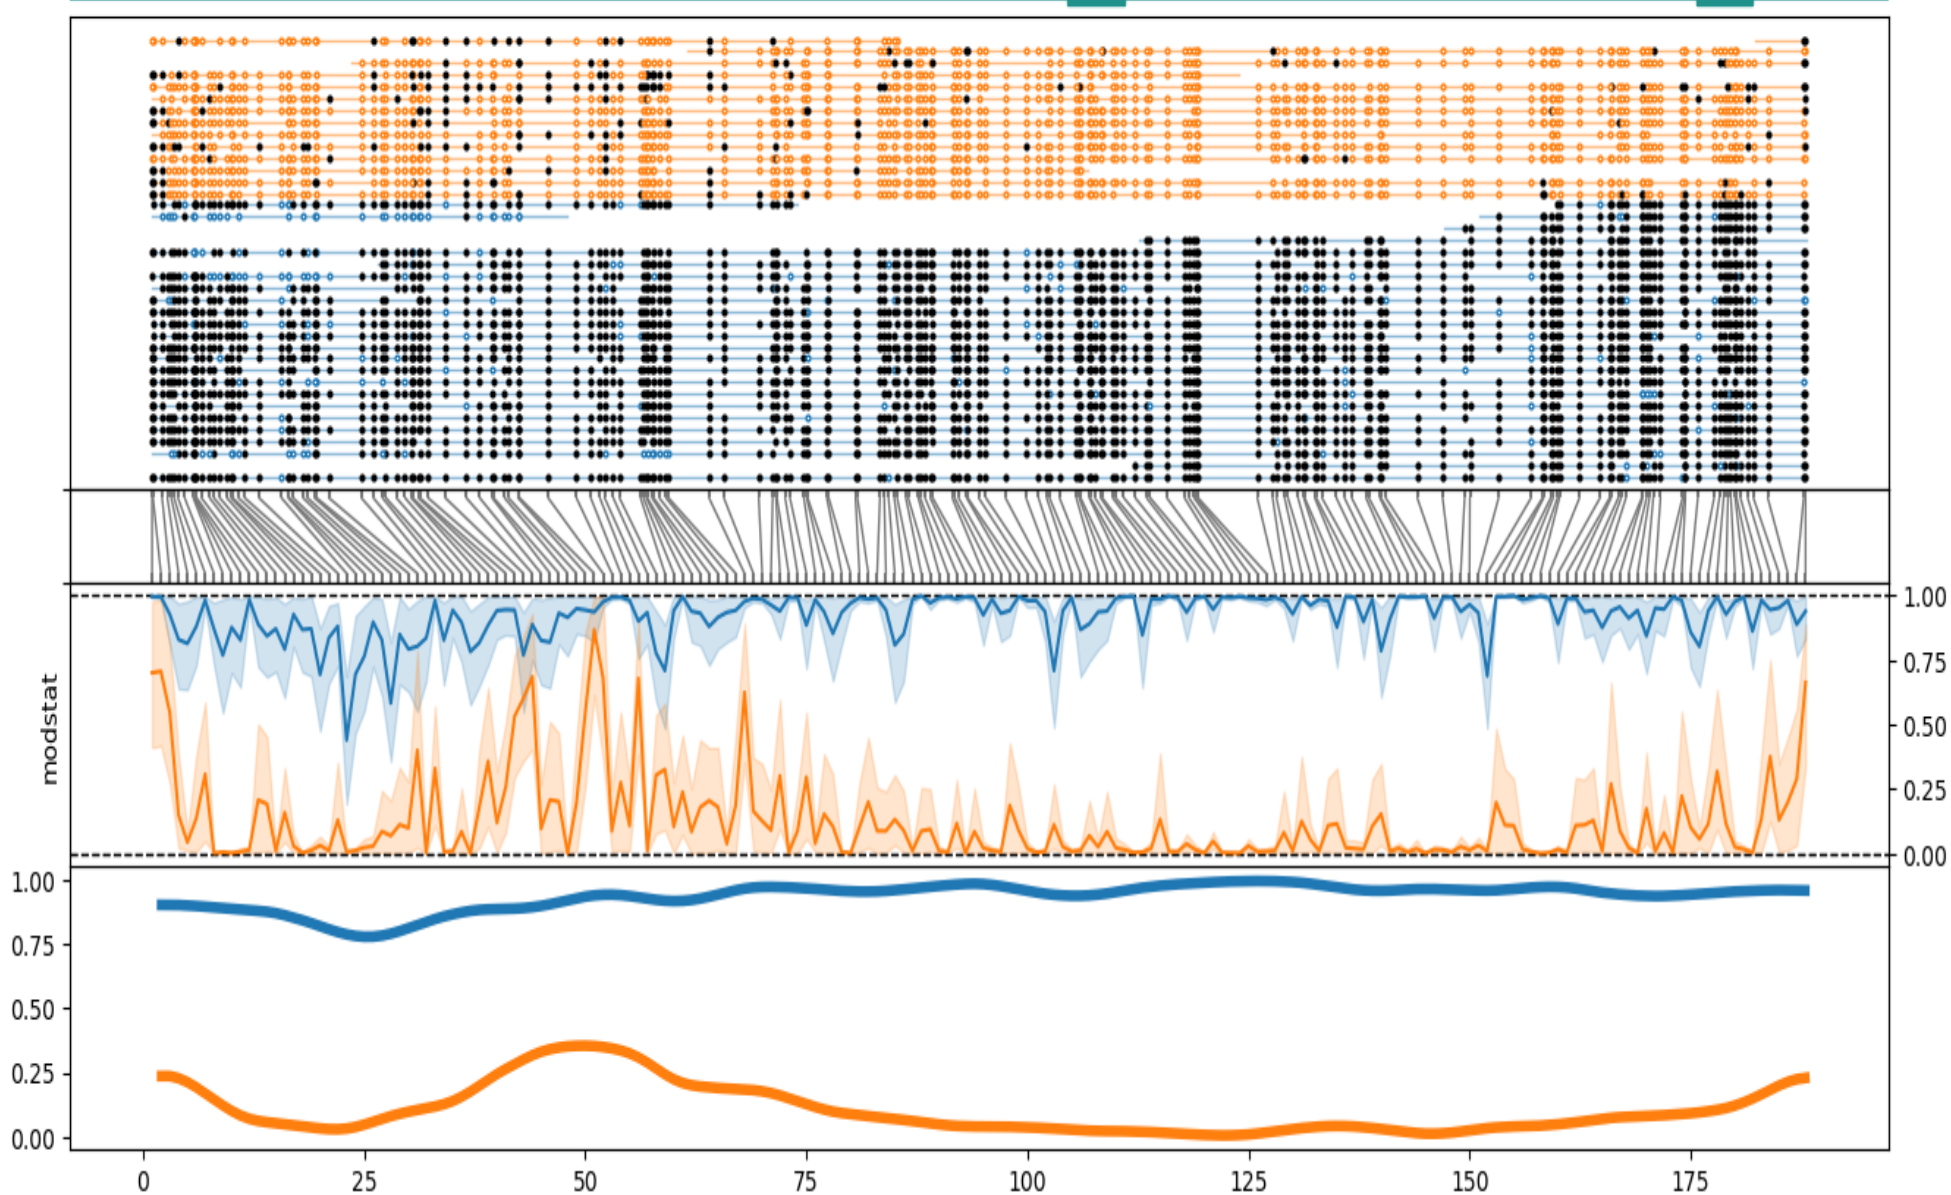

# EPI\_20\_hg38\_phased\_chr14\_100904325\_100905081

chr14 100904356 100904424 100904492 100904560 100904628 100904696 100904764 100904832 100904900 100904968 100905036 100905104

MEG8>>

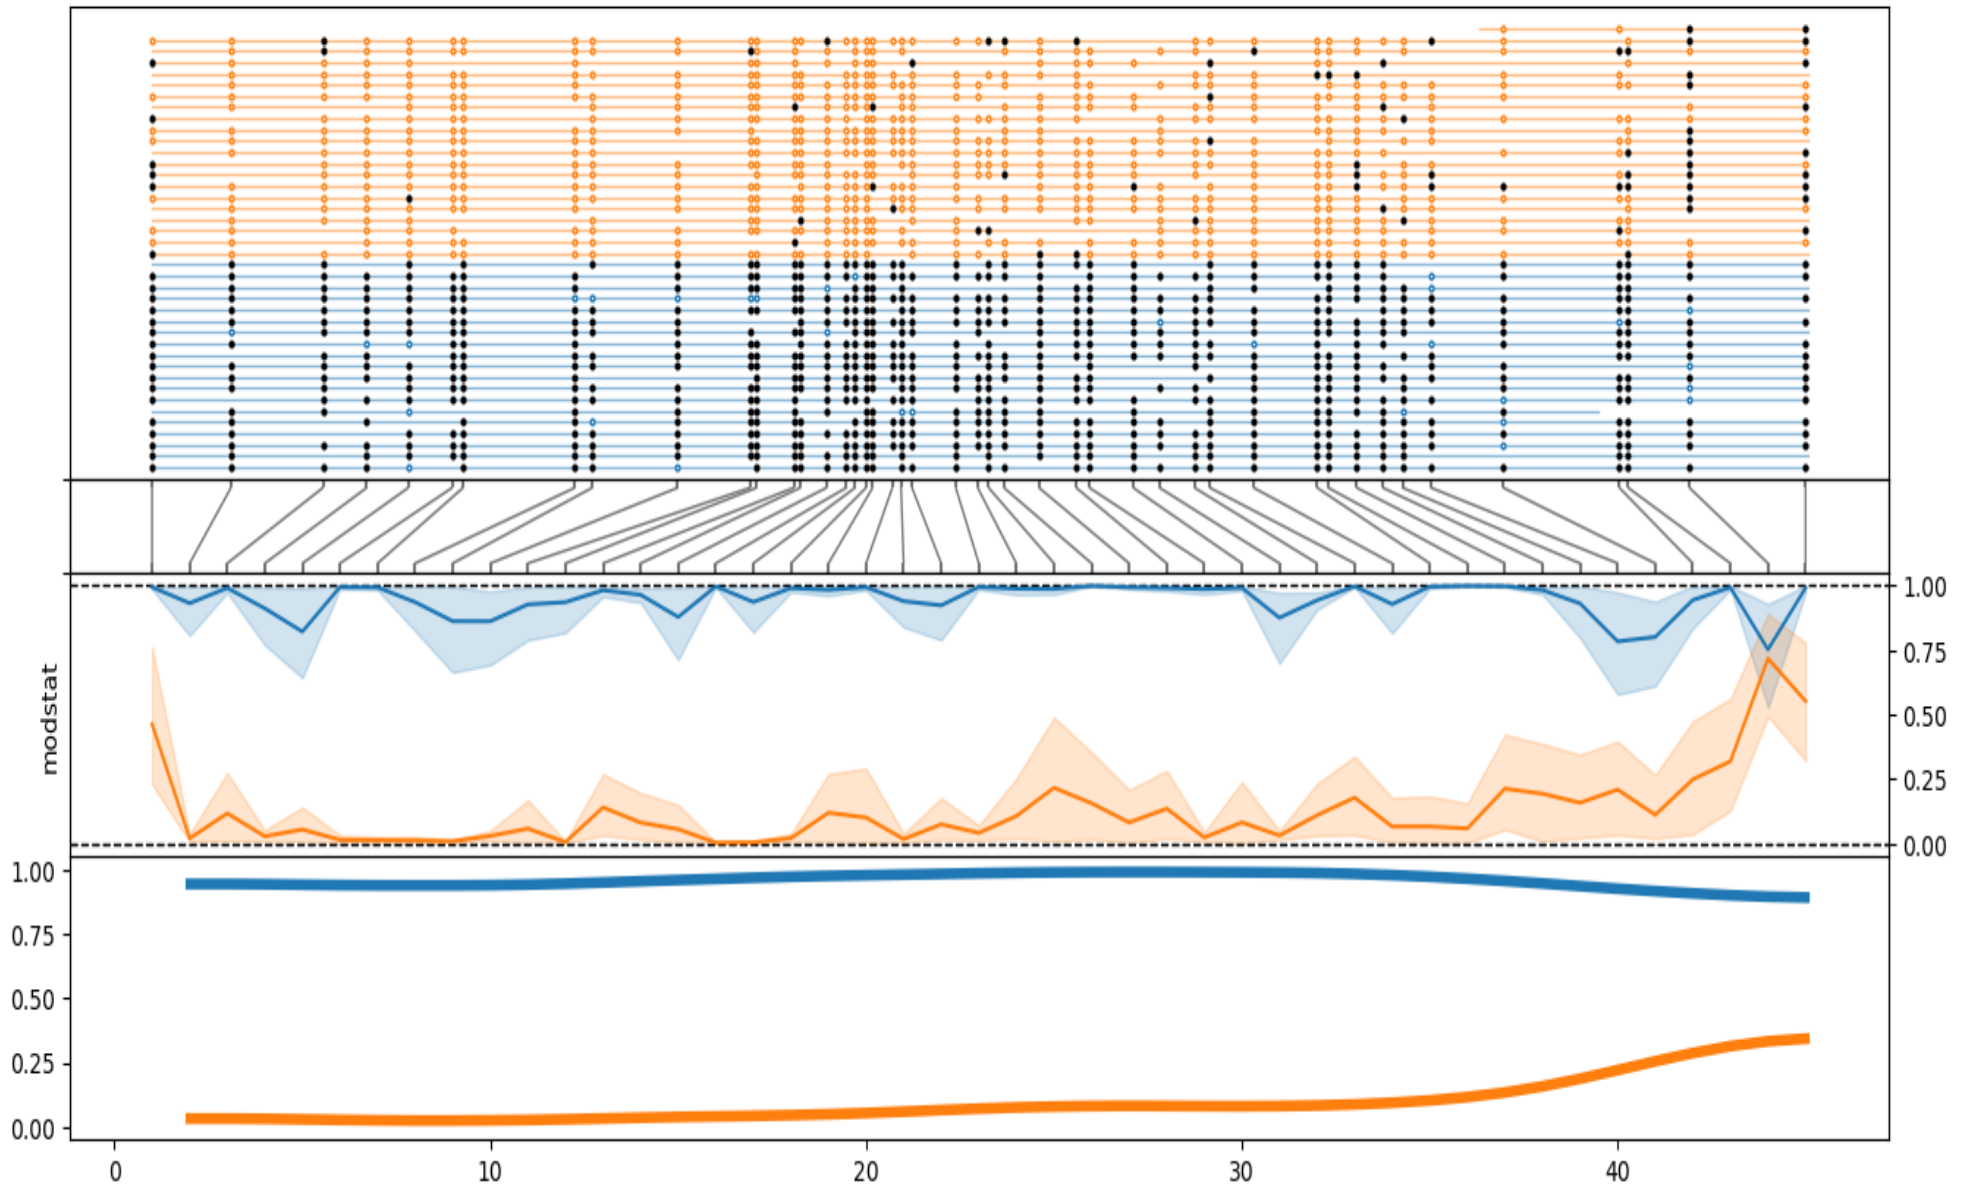

# EPI\_20\_hg38\_phased\_chr15\_23647178\_23648424

chr15:23647229 23647342 23647455 23647568 23647681 23647794 23647907 23648020 23648133 23648246 23648359 23648472

<<MAGEL2

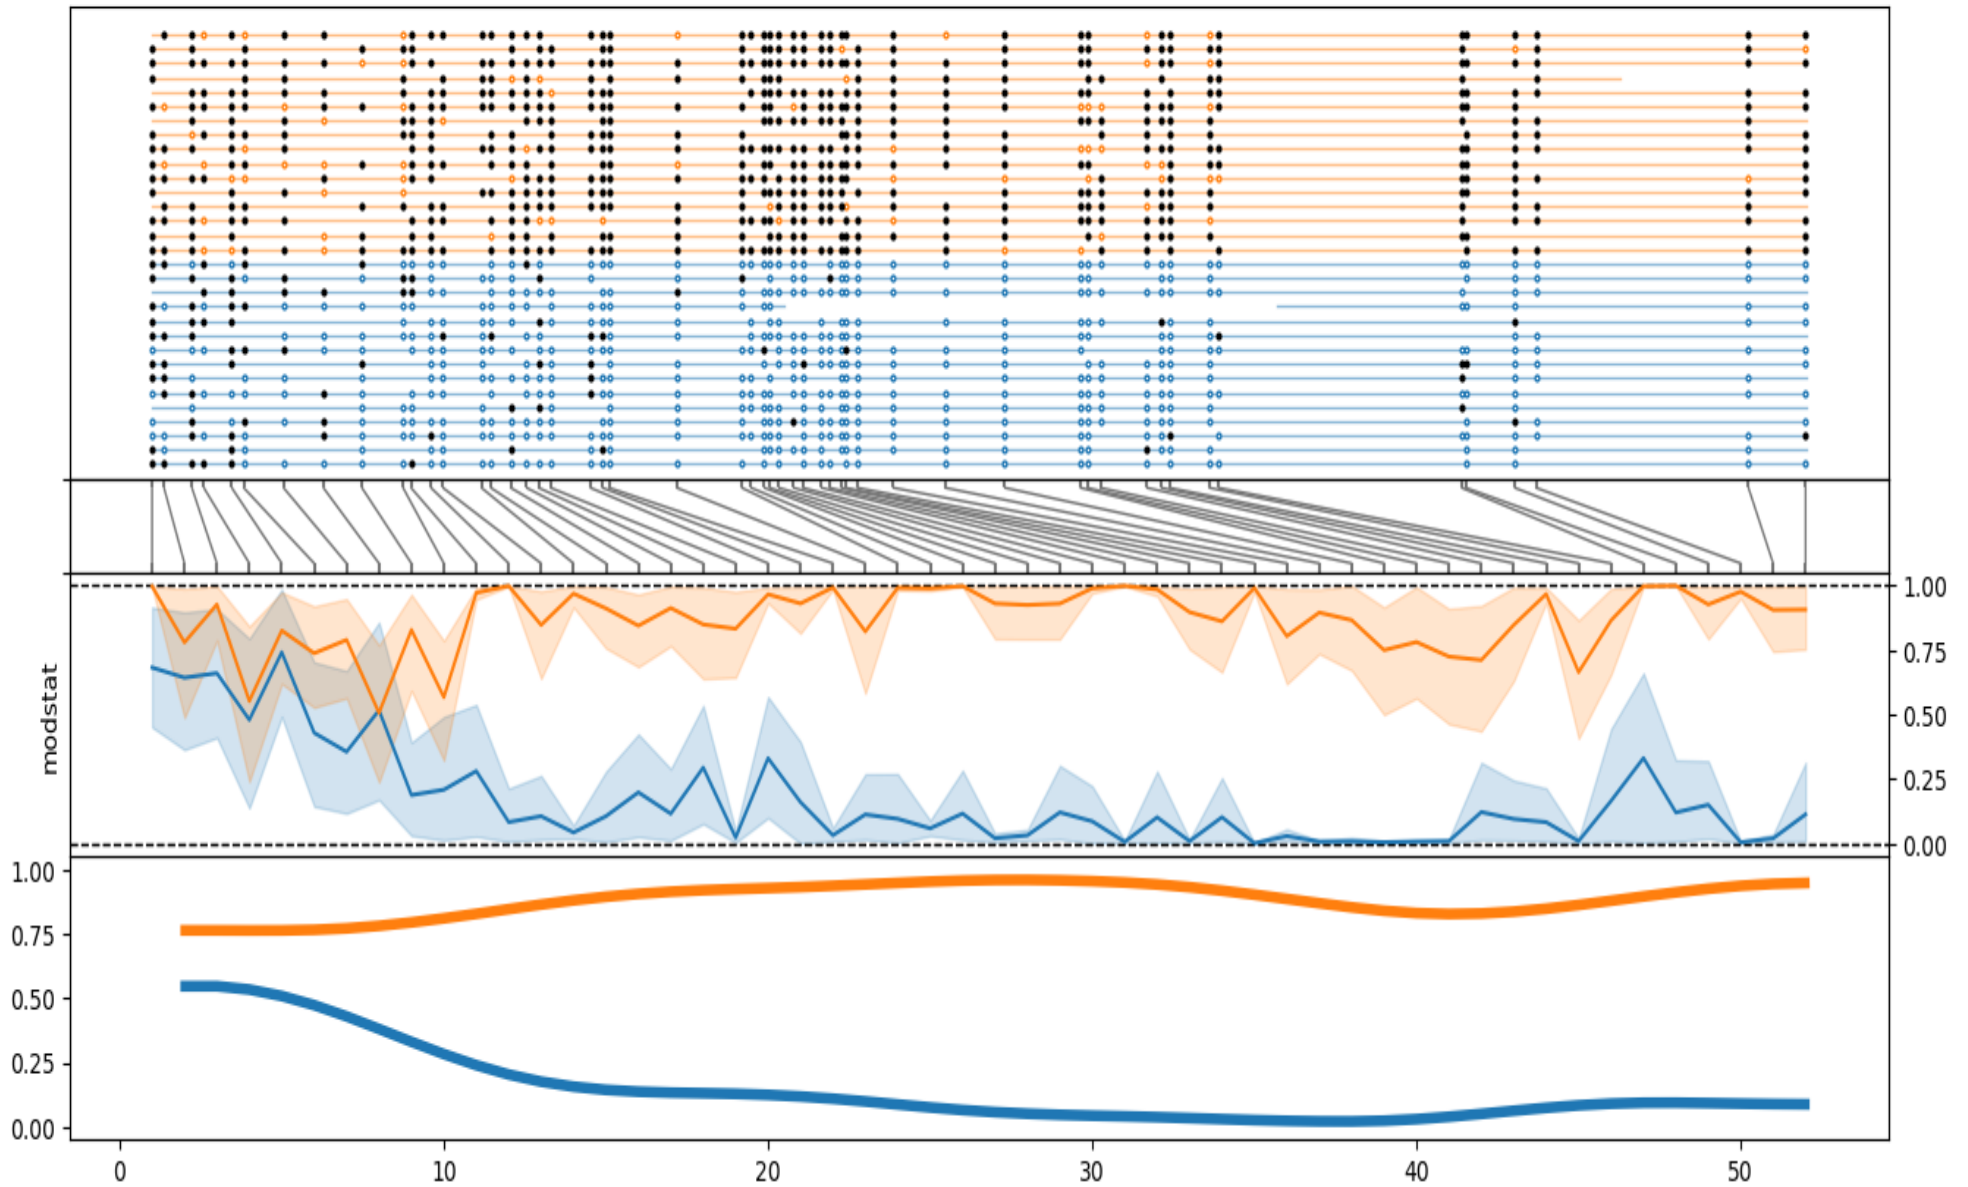

# EPI\_20\_hg38\_phased\_chr15\_24954564\_24956828

chr15:24954657 24954862 24955067 24955272 24955477 24955682 24955887 24956092 24956297 24956502 24956707 24956912

SNRPN>>

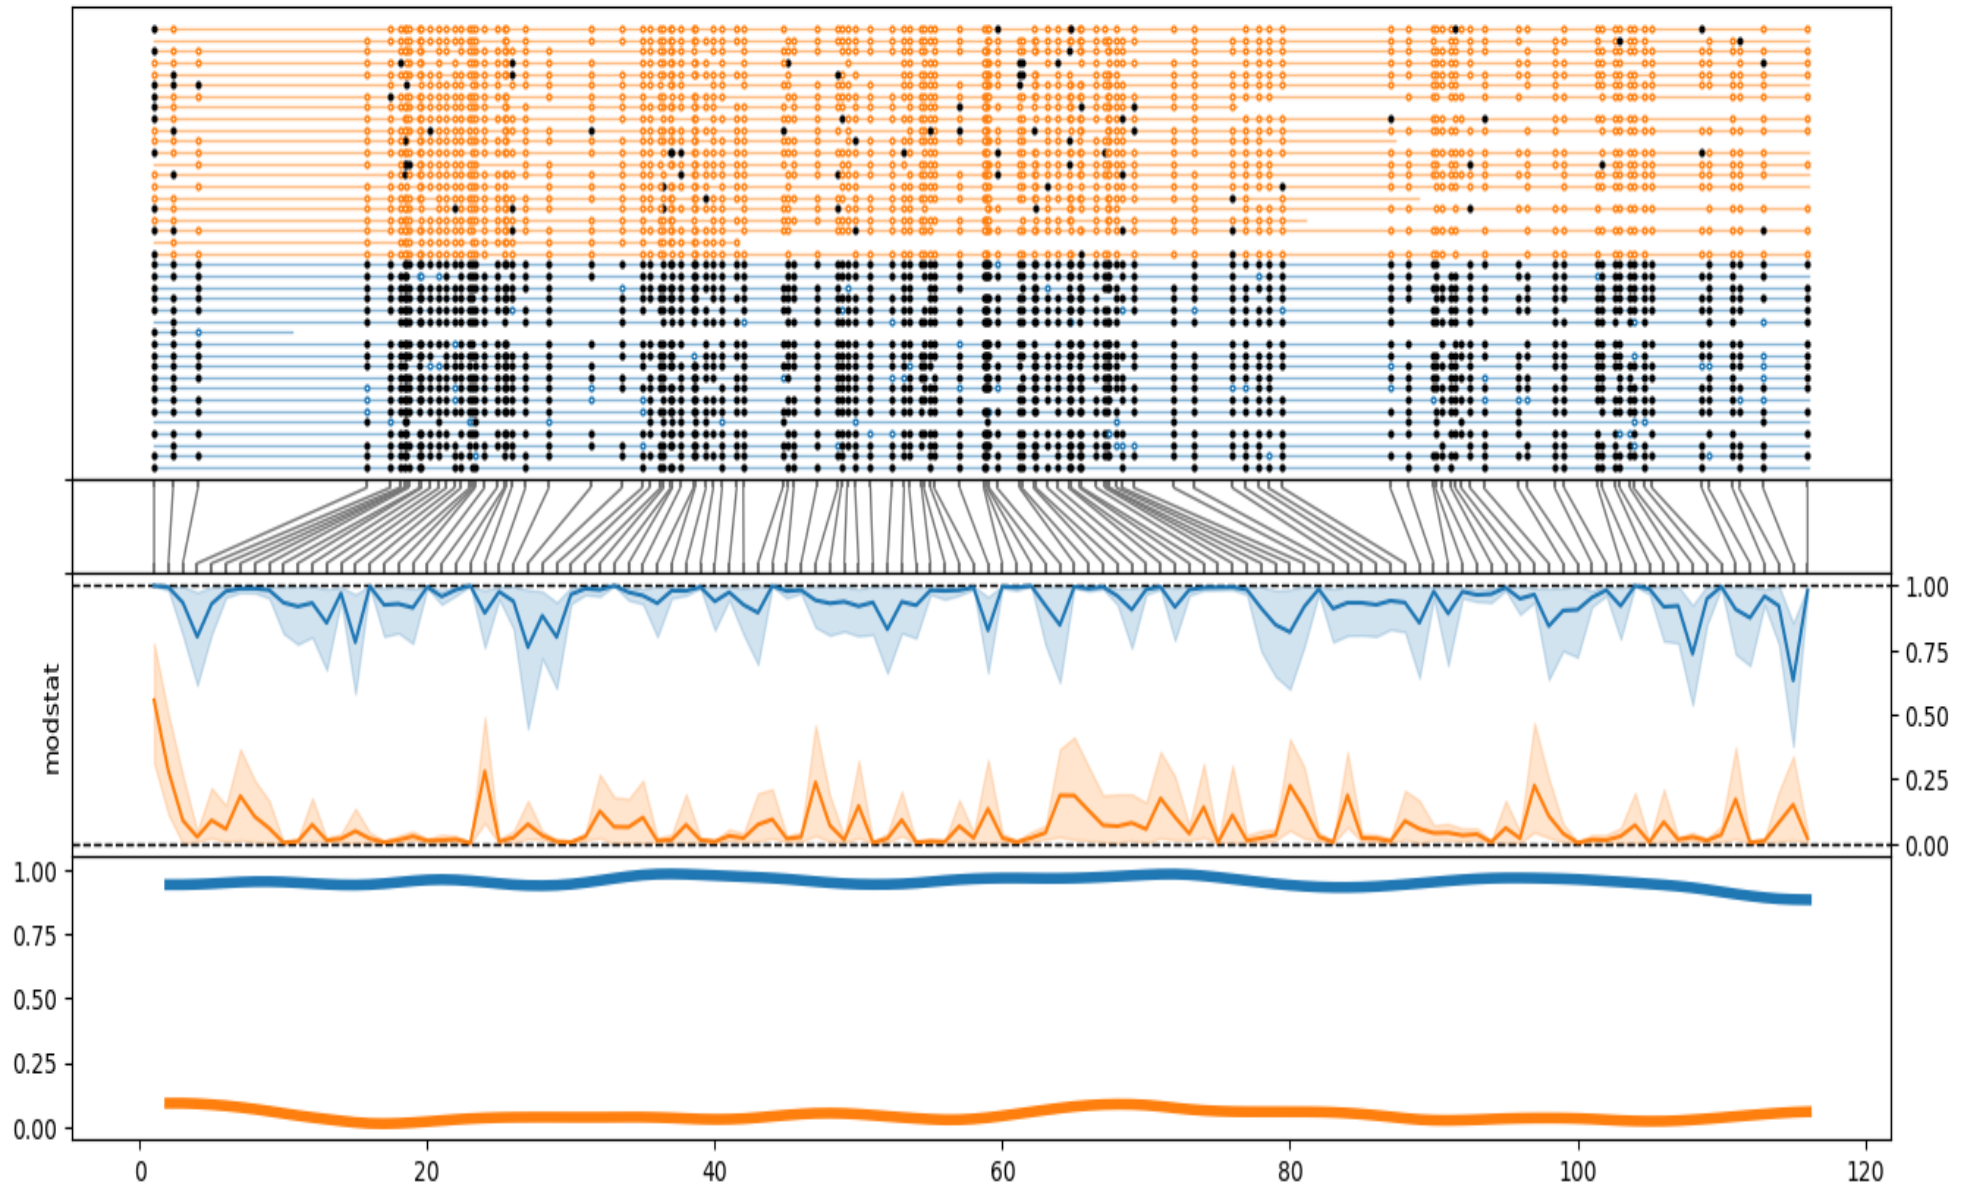

Supplement: 13073_2024_1419_MOESM4_ESM.pdf [file 13073_2024_1419_MOESM4_ESM.pdf]
