# Supplementary material for: Clinical evaluation of long-read sequencing-based episignature detection in developmental disorders
Source: PubMed Central journal article supplement — Genome Med. 2025 Jan 10;17:1. doi: 10.1186/s13073-024-01419-z (PMC11721592; doi:10.1186/s13073-024-01419-z), 2025-01-10

### Additional file 7: Fig. S3

#### Phasing of methylome and genome variation.

Screenshots of the visualization of EPI\_13's Oxford Nanopore long read sequencing BAM files in IGV [19] at the *AR* gene locus. We observe a paternally inherited SNV in *cis* with unmethylation of the promotor region of the gene, confirming the inactivation of the maternal allele showed in Fig. 4.

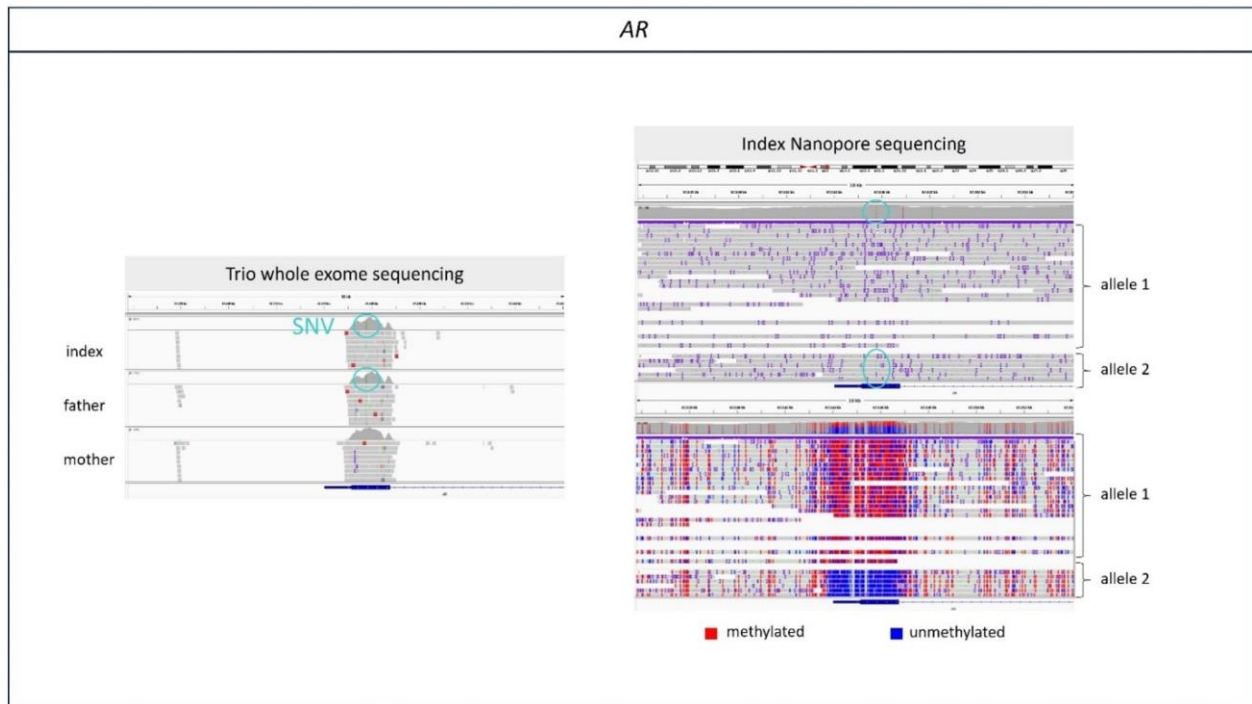

Supplement: 13073_2024_1419_MOESM7_ESM.pdf [file 13073_2024_1419_MOESM7_ESM.pdf]
